# Supplementary material for: Sulfur-controlled and rhodium-catalyzed formal (3 + 3) transannulation of thioacyl carbenes with alk-2-enals and mechanistic insights
Source: Royal Society of Chemistry journal article supplement (doi:10.1039/d1ob00116g), 2021-01-01

# Sulfur-Controlled and Rhodium-Catalyzed Formal (3 + 3) Transannulation of Thioacyl Carbenes with Alk-2-enals and Mechanistic Insights

Qiuyue Wu, Ziyang Dong, Jiayi Xu\* and Zhanhui Yang\*

Department of Organic Chemistry, College of Chemistry, Beijing University of Chemical  
Technology, Beijing 100029, P. R. China.

**Email:** [jxxu@mail.buct.edu.cn](mailto:jxxu@mail.buct.edu.cn) (J.X.); [zhyang@mail.buct.edu.cn](mailto:zhyang@mail.buct.edu.cn) (Z.Y.)

## Contents

|                                                                                                                                             |     |
|---------------------------------------------------------------------------------------------------------------------------------------------|-----|
| 1. General Information .....                                                                                                                | 2   |
| 2. Detailed Optimizations on the Reaction Conditions .....                                                                                  | 3   |
| 3. Crystal Data and Structure of Ethyl 2,2-Dimethyl-4-oxo-6-phenyl-3,4-dihydro-2 <i>H</i> -<br>thiopyran-5-carboxylate ( <b>3aa</b> ) ..... | 4   |
| 4. General procedure for the synthesis of thiadiazoles <b>1</b> .....                                                                       | 6   |
| 5. General procedure for the synthesis of alk-2-enals <b>2</b> .....                                                                        | 9   |
| 6. General procedure for the synthesis of ethyl 4-oxo-3,4-dihydro-2 <i>H</i> -thiopyran-5-<br>carboxylates <b>3</b> and <b>13</b> .....     | 13  |
| 7. Intermediate Probing Experiments .....                                                                                                   | 22  |
| 8. Isotope Tracing Experiments .....                                                                                                        | 23  |
| 9. KIE Studies .....                                                                                                                        | 24  |
| 10. Gram-scale reaction .....                                                                                                               | 24  |
| 11. Trials on asymmetric catalysis .....                                                                                                    | 25  |
| 12. Reference .....                                                                                                                         | 28  |
| 13. Copies of Spectra of Materials, Intermediates, and Products .....                                                                       | 30  |
| 14. Copies of NMR Spectra of the Crude Reaction Mixtures in KIE Studies .....                                                               | 142 |

## 1. General Information

Unless otherwise noted, all starting materials were purchased from commercial suppliers. Chlorobenzene and acetonitrile were refluxed over CaH<sub>2</sub> and freshly distilled prior to use. Tetrahydrofuran was refluxed over LiAlH<sub>4</sub> and freshly distilled prior to use. Toluene was refluxed over Na and freshly distilled prior to use. Column chromatography was performed using silica gel (normal phase, 200–300 mesh) from branch of Anhui Liangchen Silicon Material Co. Ltd, with petroleum ether (60–90 °C fraction), hexane, methylene chloride and ethyl acetate as eluents. Reactions were monitored by thin-layer chromatography (TLC) on GF254 silica gel plates (0.2 mm) from Anhui Liangchen Silicon Material Co. Ltd. The plates were visualized under UV light, as well as other TLC stains (1% potassium permanganate in water; 10 g of iodine absorbed on 30 g of silica gel; 12 g 2,4-dinitrophenylhydrazine dissolved in 60 mL of H<sub>2</sub>SO<sub>4</sub> and 80 mL H<sub>2</sub>O in 200 mL 95% EtOH.). <sup>1</sup>H, <sup>19</sup>F, and <sup>13</sup>C{<sup>1</sup>H} NMR spectra were recorded on a 400 MHz spectrometer, usually in CDCl<sub>3</sub> with TMS as an internal standard, and the chemical shifts ( $\delta$ ) are reported in parts per million (ppm). And multiplicities are indicated as s (singlet), d (doublet), t (triplet), q (quartet), dd (double doublet), m (multiplet). Coupling constants (*J*) are reported in Hertz (Hz). HRMS measurements were carried out on an LC/MSD TOF mass spectrometer. The IR spectra (film,  $\nu$  [cm<sup>-1</sup>]) were taken on an FT IR spectrometer. Melting points were obtained on a melting point apparatus and are uncorrected. Single crystal X-ray diffraction analysis (**3aa**) was performed on a single crystal X-ray diffractometer. The enantiomeric excesses were determined by chiral HPLC analysis using an Agilent 1260 LC instrument with Daicel Chiralpak AS-H column with a mixture of isopropyl alcohol and hexane as eluents. PE, EA, PhCl, DCM, MeOH, Et<sub>2</sub>O and THF are abbreviated for petroleum ether, ethyl acetate, chlorobenzene, methylene chloride, methanol, diethyl ether and tetrahydrofuran, respectively.

Compounds **3aa**, **3ag**, **3aq**, **3au**, **3av**, **3aw**, **3ax**, **3az**, **3aaa** and **3aab** were reported in our previous work.<sup>1</sup> For their analytical data and spectra, and those of the alkenals (**2q**, **2u**, **2v**, **2w**, **2x**, **2z**, **2aa**, and **2ab**), please see the supporting information of our previous publications.<sup>1</sup>

## 2. Detailed Optimizations on the Reaction Conditions

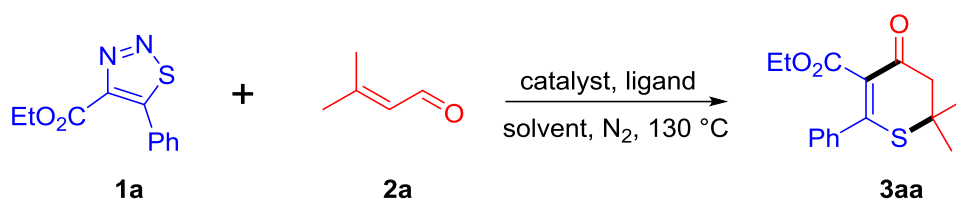

**Table S1. Optimization of reaction conditions<sup>a</sup>**

| Entry | Catalyst (mol%)              | Ligand (mol%)                                | Solvent | Yield <sup>b</sup> (%) |
|-------|------------------------------|----------------------------------------------|---------|------------------------|
| 1     | [Rh(COD)Cl] <sub>2</sub> (5) | DPPF (12)                                    | PhCl    | 72                     |
| 2     | [Rh(COD)Cl] <sub>2</sub> (5) | —                                            | PhCl    | trace                  |
| 3     | [Rh(COD)Cl] <sub>2</sub> (5) | DPPF (12)                                    | PhCl    | trace <sup>c</sup>     |
| 4     | [Rh(COD)Cl] <sub>2</sub> (5) | DPPF (12)                                    | PhCl    | 3 <sup>d</sup>         |
| 5     | [Rh(COD)Cl] <sub>2</sub> (5) | DPPM (12)                                    | PhCl    | trace                  |
| 6     | [Rh(COD)Cl] <sub>2</sub> (5) | DPPE (12)                                    | PhCl    | 6                      |
| 7     | [Rh(COD)Cl] <sub>2</sub> (5) | DPPP (12)                                    | PhCl    | 8                      |
| 8     | [Rh(COD)Cl] <sub>2</sub> (5) | DPPB (12)                                    | PhCl    | 15                     |
| 9     | [Rh(COD)Cl] <sub>2</sub> (5) | DPPPenta (12)                                | PhCl    | 3                      |
| 10    | [RhCp*Cl] <sub>2</sub> (5)   | DPPF (12)                                    | PhCl    | 63                     |
| 11    | [RhCp*Cl] <sub>2</sub> (5)   | DPPE (12)                                    | PhCl    | trace                  |
| 12    | [RhCp*Cl] <sub>2</sub> (5)   | DPPP (12)                                    | PhCl    | 8                      |
| 13    | [RhCp*Cl] <sub>2</sub> (5)   | DPPB (12)                                    | PhCl    | 7                      |
| 14    | [RhCp*Cl] <sub>2</sub> (5)   | DPPPenta (12)                                | PhCl    | 1                      |
| 15    | [Rh(COD)Cl] <sub>2</sub> (5) | PPh <sub>3</sub> (24)                        | PhCl    | trace                  |
| 16    | [Rh(COD)Cl] <sub>2</sub> (5) | Triphenyl phosphorus oxychloride (24)        | PhCl    | trace                  |
| 17    | [Rh(COD)Cl] <sub>2</sub> (5) | Triethyl phosphite (24)                      | PhCl    | trace                  |
| 18    | [Rh(COD)Cl] <sub>2</sub> (5) | Triphenyl phosphite (24)                     | PhCl    | trace                  |
| 19    | [Rh(COD)Cl] <sub>2</sub> (5) | Triphenyl phosphate (24)                     | PhCl    | trace                  |
| 20    | [Rh(COD)Cl] <sub>2</sub> (5) | Triethyl phosphate (24)                      | PhCl    | trace                  |
| 21    | [Rh(COD)Cl] <sub>2</sub> (5) | Tris(4-trifluoromethylphenyl) phosphine (24) | PhCl    | trace                  |
| 22    | [Rh(COD)Cl] <sub>2</sub> (5) | Tris(pentafluorophenyl)phosphine (24)        | PhCl    | trace                  |
| 23    | [Rh(COD)Cl] <sub>2</sub> (5) | DPPF (12)                                    | PhMe    | 54                     |

<sup>a</sup> Reaction was carried out with 1,2,3-thiadiazole **1a** (0.25 mmol) and 3-methyl-2-butenal (**2a**) (0.5 mmol) in the presence of 1.0 mL of solvent for 6 h.

<sup>b</sup> Yield of the isolated product.

<sup>c</sup> Reaction was carried out at 50 °C.

<sup>d</sup> Reaction was carried out at 100 °C.

### 3. Crystal Data and Structure of Ethyl 2,2-Dimethyl-4-oxo-6-phenyl-3,4-dihydro-2*H*-thiopyran-5-carboxylate (**3aa**)

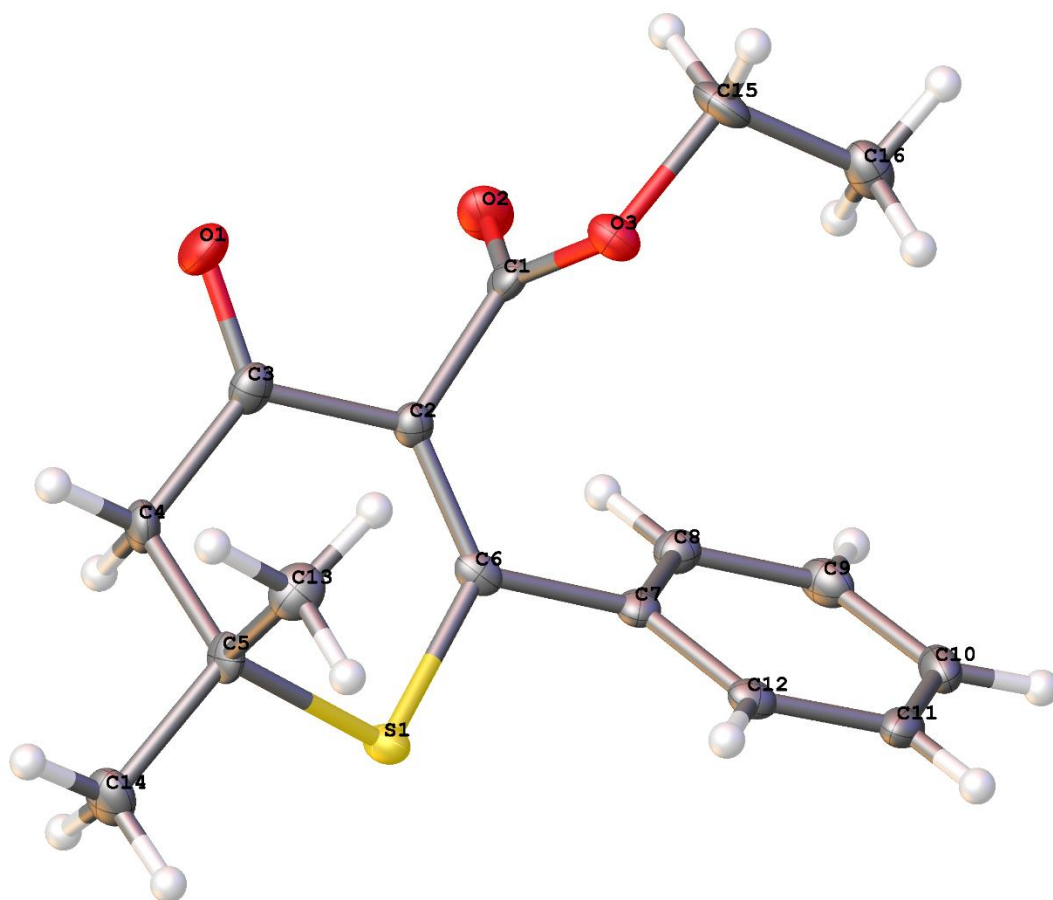

**Figure S1.** Thermal ellipsoid plot for the crystal structure of **3aa** (at 50% probability level)

#### Experimental

Single crystals of  $C_{16}H_{18}O_3S$  (**3aa**) were recrystallized from diethyl ether, mounted in inert oil, and transferred to the cold gas stream of the diffractometer.

The X-ray intensity data were measured at 105.6 K, on an Agilent Gemini E single crystal X-ray diffractometer. The crystal data of **3aa** has been deposited in CCDC with number 1919688.

#### Crystal structure determination of **3aa**

**Crystal Data.**  $C_{16}H_{18}O_3S$ ,  $M = 290.36$ , monoclinic,  $a = 17.860(3) \text{ \AA}$ ,  $b = 8.4885(4) \text{ \AA}$ ,  $c = 14.325(2) \text{ \AA}$ ,  $\beta = 136.68(3)^\circ$ ,  $U = 1489.9(7) \text{ \AA}^3$ ,  $T = 105.6$ , space group Cc (no. 9),  $Z = 4$ ,  $\mu$  (Cu K $\alpha$ ) = 1.968, 2624 reflections measured, 1579 unique ( $R_{\text{int}} = 0.0190$ ) which were used in all calculations. The final  $wR(F_2)$  was 0.0755 (all data).

**Table S2.** Crystal data and structure refinement for **3aa**

|                                                                         |                                                   |
|-------------------------------------------------------------------------|---------------------------------------------------|
| Identification code                                                     | exp_5184                                          |
| Empirical formula                                                       | C <sub>16</sub> H <sub>18</sub> O <sub>3</sub> S  |
| Formula weight                                                          | 290.36                                            |
| Temperature / K                                                         | 105.6                                             |
| Crystal system                                                          | monoclinic                                        |
| Space group                                                             | Cc                                                |
| a / Å, b / Å, c / Å                                                     | 17.860(3), 8.4885(4), 14.325(2)                   |
| α/°, β/°, γ/°                                                           | 90, 136.68(3), 90                                 |
| Volume / Å <sup>3</sup>                                                 | 1489.9(7)                                         |
| Z                                                                       | 4                                                 |
| ρ <sub>calc</sub> / mg mm <sup>-3</sup>                                 | 1.294                                             |
| μ / mm <sup>-1</sup>                                                    | 1.968                                             |
| F(000)                                                                  | 616                                               |
| Crystal size / mm <sup>3</sup>                                          | 0.150 × 0.140 × 0.130                             |
| 2θ range for data collection                                            | 12.138 to 142.142°                                |
| Index ranges                                                            | -19 ≤ h ≤ 21, -9 ≤ k ≤ 10, -16 ≤ l ≤ 17           |
| Reflections collected                                                   | 2624                                              |
| Independent reflections                                                 | 1579[R(int) = 0.0190 (inf-0.9Å)]                  |
| Data/restraints/parameters                                              | 1579/2/184                                        |
| Goodness-of-fit on F <sup>2</sup>                                       | 1.082                                             |
| Final R indexes [I > 2σ (I) i.e. F <sub>o</sub> > 4σ (F <sub>o</sub> )] | R <sub>1</sub> = 0.0287, wR <sub>2</sub> = 0.0753 |
| Final R indexes [all data]                                              | R <sub>1</sub> = 0.0289, wR <sub>2</sub> = 0.0755 |
| Largest diff. peak/hole / e Å <sup>-3</sup>                             | 0.227/-0.254                                      |
| Flack Parameters                                                        | 0.031(18)                                         |
| Completeness                                                            | 0.979                                             |

#### 4. General procedure for the synthesis of thiadiazoles **1**

Thiadiazoles **1a–1m** were prepared according to Gevorgyan's<sup>2</sup> and Lee's<sup>3</sup> published procedures.

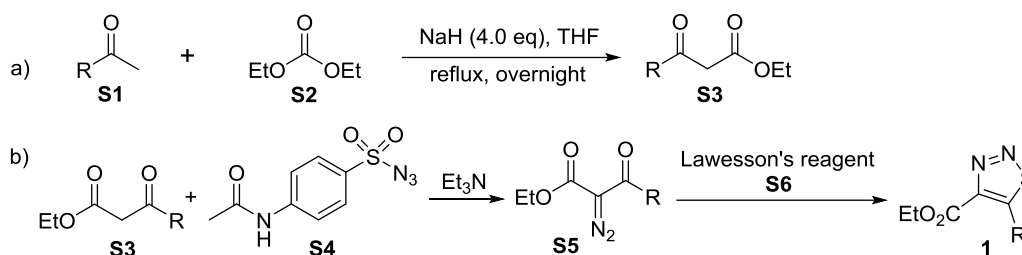

a) An oven-dried 100-mL flask were charged with a stirrer bar, NaH (60% in mineral oil, 1.60 g, 40 mmol), dry THF (25 mL), and diethyl carbonate (**S2**) (4.85 mL, 40 mmol) successively. To the mixture was added a solution of ketone **S1** (10 mmol) in dry THF (15 mL) in 5 min under stirring at 0 °C. After warming up to room temperature, a spherical condenser was put on the flask. The reaction mixture was refluxed overnight, then quenched with 1 M HCl (30 mL) under stirring at 0 °C. When there was no bubble released, solvent THF was removed in vacuo. The mixture was added water (20 mL), and then extracted with ethyl acetate (20 mL  $\times$  3). The combined organic layers were dried over  $\text{Na}_2\text{SO}_4$ . After removal of the solvent in vacuo, the residue was purified by flash chromatography (silica gel, PE:EA 20:1 to 5:1, v/v), affording the corresponding  $\beta$ -keto ester **S3**.

b) In a flask, the above prepared  $\beta$ -keto ester **S3** (10 mmol) and 4-acetamidobenzenesulfonyl azide (**S4**) (2.64 g, 11 mmol) were dissolved in acetonitrile (60 mL). Triethylamine (3.05 g, 30 mmol) was slowly added at 0 °C. The reaction mixture was stirred at room temperature overnight. After removal of the solvent by rotary evaporation, the resulting residue was purified by column chromatography (PE/EA = 3:1, v/v) to give ethyl 2-diazo-3-oxo-3-arylpropanoate **S5**. The diazo compound **S5** was then dissolved in toluene (50 mL), followed by addition of Lawesson's reagent (**S6**) (4.85 g, 12 mmol). The mixture was heated at reflux for 4 h. After the reaction was completed, the solvent was removed by rotary evaporation, and the resulting residue was purified by silica gel column chromatography (PE/EA = 10:1 to 20:1 or DCM/MeOH = 100:1, v/v) to afford ethyl 5-aryl-1,2,3-thiadiazole-4-carboxylate **1**.

All the thiadiazoles **1** are known compounds. For those without published spectra data, IR and HRMS data are also provided here.

Ethyl 5-phenyl-1,2,3-thiadiazole-4-carboxylate (**1a**)<sup>2,3</sup> [CAS No. 60474-27-3]

Yellow solid, 2.06 g, 88% yield over the last two steps, m.p. 36–37 °C,  $R_f$  = 0.45 (PE/EA = 5:1, v/v). <sup>1</sup>H NMR (400 MHz,  $\text{CDCl}_3$ )  $\delta$  7.55 – 7.44 (m, 5H), 4.41 (q,  $J$  = 7.1 Hz, 2H), 1.33 (t,  $J$  = 7.1 Hz, 3H). <sup>13</sup>C NMR{<sup>1</sup>H} (101 MHz,  $\text{CDCl}_3$ )  $\delta$  161.9, 160.4, 148.4, 130.6, 129.7, 128.6, 126.1, 62.0, 14.0.

Ethyl 5-(benzo[*d*][1,3]dioxol-5-yl)-1,2,3-thiadiazole-4-carboxylate (**1b**)<sup>3a</sup> [CAS No. 2022219-62-9]

Pale yellow solid, 2.13 g, 77% yield over three steps, m.p. 81–82 °C (Lit.<sup>3a</sup> 84–86 °C),  $R_f = 0.5$  (PE/EA = 3:1, *v/v*),  $R_f = 0.5$  (DCM/MeOH = 100:1, *v/v*). <sup>1</sup>H NMR (400 MHz, CDCl<sub>3</sub>)  $\delta$  7.07 – 7.01 (m, 2H), 6.89 (dd,  $J = 7.9, 0.6$  Hz, 1H), 6.06 (s, 2H), 4.46 (q,  $J = 7.1$  Hz, 2H), 1.39 (t,  $J = 7.1$  Hz, 3H). <sup>13</sup>C NMR{<sup>1</sup>H} (101 MHz, CDCl<sub>3</sub>)  $\delta$  161.9, 160.6, 149.9, 148.0, 147.9, 124.6, 119.2, 110.0, 108.5, 101.9, 62.1, 14.1.

Ethyl 5-(4-methoxyphenyl)-1,2,3-thiadiazole-4-carboxylate (**1c**)<sup>3b</sup> [CAS No. 2010973-32-5]

Pale yellow solid, 2.05 g, 78% yield over three steps, m.p. 49–50 °C (Lit.<sup>3b</sup> 50–52 °C),  $R_f = 0.3$  (PE/EA = 5:1, *v/v*),  $R_f = 0.45$  (DCM/MeOH = 100:1, *v/v*). <sup>1</sup>H NMR (400 MHz, CDCl<sub>3</sub>)  $\delta$  7.51 (d,  $J = 8.8$  Hz, 2H), 6.98 (d,  $J = 8.8$  Hz, 2H), 4.44 (q,  $J = 7.1$  Hz, 2H), 3.86 (s, 3H), 1.37 (t,  $J = 7.1$  Hz, 3H). <sup>13</sup>C NMR{<sup>1</sup>H} (101 MHz, CDCl<sub>3</sub>)  $\delta$  162.1, 161.6, 160.7, 147.6, 131.4, 117.9, 114.1, 62.0, 55.4, 14.1.

Ethyl 5-(4-methylphenyl)-1,2,3-thiadiazole-4-carboxylate (**1d**)<sup>3b</sup> [CAS No. 340260-34-6]

Yellow solid, 1.41 g, 57% yield over three steps, m.p. 46–47 °C (Lit.<sup>3b</sup> 44–46 °C),  $R_f = 0.3$  (PE/EA = 15:1, *v/v*). <sup>1</sup>H NMR (400 MHz, CDCl<sub>3</sub>)  $\delta$  7.42 (d,  $J = 8.1$  Hz, 2H), 7.27 (d,  $J = 8.5$  Hz, 2H), 4.43 (q,  $J = 7.1$  Hz, 2H), 2.41 (s, 3H), 1.36 (t,  $J = 7.1$  Hz, 3H). <sup>13</sup>C NMR{<sup>1</sup>H} (101 MHz, CDCl<sub>3</sub>)  $\delta$  162.2, 160.5, 148.1, 141.1, 129.6, 129.3, 123.0, 62.0, 21.4, 14.1.

Ethyl 5-(4-fluorophenyl)-1,2,3-thiadiazole-4-carboxylate (**1e**)<sup>1</sup> [CAS No. 2111487-42-2]

White solid, 2.05 g, 81% yield over three steps, m.p. 67–69 °C,  $R_f = 0.45$  (PE/EA = 5:1, *v/v*),  $R_f = 0.55$  (DCM/MeOH = 100:1, *v/v*). <sup>1</sup>H NMR (400 MHz, CDCl<sub>3</sub>)  $\delta$  7.58–7.50 (m, 2H), 7.17 (t,  $J = 8.5$  Hz, 2H), 4.43 (q,  $J = 7.1$  Hz, 2H), 1.36 (t,  $J = 7.1$  Hz, 3H). <sup>13</sup>C NMR{<sup>1</sup>H} (101 MHz, CDCl<sub>3</sub>)  $\delta$  164.1 (d,  $J_{C-F} = 253.5$  Hz), 160.9, 160.4, 148.4, 131.9 (d,  $J_{C-F} = 7.1$  Hz), 122.0 (d,  $J_{C-F} = 3.0$  Hz), 115.9 (d,  $J_{C-F} = 22.2$  Hz), 62.2, 14.1. <sup>19</sup>F NMR{<sup>1</sup>H} (376 MHz, CDCl<sub>3</sub>)  $\delta$  -109.0 (s). IR (film) 2981, 2922, 2359, 2341, 1730, 1684, 1653, 1635, 1601, 1558, 1540, 1520, 1507, 1474, 1457, 1418, 1395, 1371, 1324, 1272, 1236, 1187, 1161, 1132, 1096, 1075, 1052, 1018, 985, 848, 815, 785, 755, 696, 668, 566, 525 cm<sup>-1</sup>. HRMS (ESI-TOF)  $m/z$  [M+H]<sup>+</sup> calcd. for C<sub>11</sub>H<sub>10</sub>FN<sub>2</sub>O<sub>2</sub>S<sup>+</sup> 253.0442, found 253.0445.

Ethyl 5-(4-chlorophenyl)-1,2,3-thiadiazole-4-carboxylate (**1f**)<sup>1</sup> [CAS No. 340260-35-7]

White solid, 73% yield over three steps, m.p. 74–75 °C,  $R_f = 0.45$  (PE/EA = 5:1, *v/v*),  $R_f = 0.55$  (DCM/MeOH = 100:1, *v/v*). <sup>1</sup>H NMR (400 MHz, CDCl<sub>3</sub>)  $\delta$  7.50–7.41 (m, 4H), 4.41 (q,  $J = 7.1$  Hz, 2H), 1.34 (t,  $J = 7.1$  Hz, 3H). <sup>13</sup>C NMR{<sup>1</sup>H} (101 MHz, CDCl<sub>3</sub>)  $\delta$  160.6, 160.2, 148.4, 137.0, 131.0, 128.9, 124.4, 62.2, 14.0. IR (film) 2980, 2359, 2341, 1727, 1653, 1592, 1558, 1540, 1507, 1473, 1457, 1399, 1372, 1338, 1272, 1195, 1184, 1092, 1016, 986, 848, 837, 776, 668, 655, 555, 522, 510, 474 cm<sup>-1</sup>. HRMS (ESI-TOF)  $m/z$  [M+H]<sup>+</sup> calcd. for C<sub>11</sub>H<sub>10</sub>ClN<sub>2</sub>O<sub>3</sub>S<sup>+</sup> 269.0146, found 269.0145.

Ethyl 5-(3,4-dichlorophenyl)-1,2,3-thiadiazole-4-carboxylate (**1g**)<sup>1</sup> [CAS No. 2342602-62-2]

White solid, 2.25 g, 74% over three steps, m.p. 75–77 °C,  $R_f = 0.45$  (PE/EA = 5:1, *v/v*),  $R_f = 0.45$  (DCM/MeOH = 100:1, *v/v*). <sup>1</sup>H NMR (400 MHz, CDCl<sub>3</sub>)  $\delta$  7.65 (d,  $J = 2.2$  Hz, 1H),

7.56 (d,  $J = 8.3$  Hz, 1H), 7.37 (dd,  $J = 8.3, 2.2$  Hz, 1H), 4.44 (q,  $J = 7.2$  Hz, 2H), 1.38 (t,  $J = 7.1$  Hz, 3H).  $^{13}\text{C}$  NMR{ $^1\text{H}$ } (101 MHz,  $\text{CDCl}_3$ )  $\delta$  160.0, 159.1, 148.7, 135.2, 133.1, 131.5, 130.6, 129.0, 125.9, 62.4, 14.1. IR (film) 2923, 2359, 2341, 1732, 1718, 1699, 1683, 1652, 1636, 1558, 1541, 1520, 1507, 1489, 1473, 1457, 1436, 1418, 1373, 1321, 1274, 1194, 1132, 1051, 1032, 1015, 971, 847, 680, 555  $\text{cm}^{-1}$ . HRMS (ESI-TOF)  $m/z$  [ $\text{M}+\text{H}$ ] $^+$  calcd. for  $\text{C}_{11}\text{H}_9\text{Cl}_2\text{N}_2\text{O}_2\text{S}^+$  302.9756, found 302.9751.

Ethyl 5-(4-iodophenyl)-1,2,3-thiadiazole-4-carboxylate (**1h**) <sup>1</sup> [CAS No. 2342602-61-1]  
White solid, 2.80 g, 78% yield over three steps, m.p. 149–151 °C,  $R_f = 0.5$  (PE/EA = 5:1,  $v/v$ ),  $R_f = 0.6$  (DCM/MeOH = 100:1,  $v/v$ ).  $^1\text{H}$  NMR (400 MHz,  $\text{CDCl}_3$ )  $\delta$  7.85–7.80 (m, 2H), 7.30–7.25 (m, 2H), 4.44 (q,  $J = 7.1$  Hz, 2H), 1.37 (t,  $J = 7.1$  Hz, 3H).  $^{13}\text{C}$  NMR{ $^1\text{H}$ } (101 MHz,  $\text{CDCl}_3$ )  $\delta$  160.8, 160.2, 148.4, 137.8, 131.2, 125.5, 97.2, 62.2, 14.1. IR (film) 2973, 2921, 2358, 2341, 1718, 1684, 1652, 1636, 1577, 1558, 1540, 1520, 1507, 1471, 1457, 1418, 1393, 1369, 1336, 1271, 1193, 1131, 1076, 1056, 1010, 980, 846, 826, 776, 669, 654, 556, 519, 499, 419  $\text{cm}^{-1}$ . HRMS (ESI-TOF)  $m/z$  [ $\text{M}+\text{H}$ ] $^+$  calcd. for  $\text{C}_{11}\text{H}_{10}\text{IN}_2\text{O}_2\text{S}^+$  360.9502, found 360.9504.

Ethyl 5-(4-(trifluoromethyl)phenyl)-1,2,3-thiadiazole-4-carboxylate (**1i**) <sup>1</sup> [CAS No. 2342602-63-3]  
Brown solid, 2.19 g, 72% yield over three steps, m.p. 29–31 °C,  $R_f = 0.45$  (PE/EA = 5:1,  $v/v$ ),  $R_f = 0.45$  (DCM/MeOH = 100:1,  $v/v$ ).  $^1\text{H}$  NMR (400 MHz,  $\text{CDCl}_3$ )  $\delta$  7.74 (d,  $J = 8.2$  Hz, 2H), 7.65 (d,  $J = 8.1$  Hz, 2H), 4.43 (q,  $J = 7.1$  Hz, 2H), 1.34 (t,  $J = 7.1$  Hz, 3H).  $^{13}\text{C}$  NMR{ $^1\text{H}$ } (101 MHz,  $\text{CDCl}_3$ )  $\delta$  160.10, 160.05, 148.9, 132.5 (q,  $J_{\text{C-F}} = 33.3$  Hz), 130.2, 129.9, 125.5 (q,  $J_{\text{C-F}} = 4.0$  Hz), 123.5 (q,  $J_{\text{C-F}} = 273.7$  Hz), 62.3, 14.0.  $^{19}\text{F}$  NMR{ $^1\text{H}$ } (376 MHz,  $\text{CDCl}_3$ )  $\delta$  -63.05 (s). IR (film) 2984, 2359, 1732, 1684, 1653, 1617, 1558, 1507, 1487, 1457, 1409, 1373, 1325, 1274, 1169, 1130, 1068, 1019, 985, 849, 787, 687, 577  $\text{cm}^{-1}$ . HRMS (ESI-TOF)  $m/z$  [ $\text{M}+\text{H}$ ] $^+$  calcd. for  $\text{C}_{12}\text{H}_{10}\text{F}_3\text{N}_2\text{O}_2\text{S}^+$  303.0410, found 303.0410.

Ethyl 5-(4-cyanophenyl)-1,2,3-thiadiazole-4-carboxylate (**1j**) <sup>3a</sup> [CAS No. 2022219-64-1]  
Pale brown solid, 1.54 g, 59% yield over three steps, m.p. 108–110 °C,  $R_f = 0.4$  (PE/EA = 3:1,  $v/v$ ).  $^1\text{H}$  NMR (400 MHz,  $\text{CDCl}_3$ )  $\delta$  7.78 (d,  $J = 8.5$  Hz, 2H), 7.65 (d,  $J = 8.5$  Hz, 2H), 4.44 (q,  $J = 7.1$  Hz, 2H), 1.36 (t,  $J = 7.1$  Hz, 3H).  $^{13}\text{C}$  NMR{ $^1\text{H}$ } (101 MHz,  $\text{CDCl}_3$ )  $\delta$  159.9, 159.5, 149.0, 132.2, 131.0, 130.5, 117.8, 114.4, 62.5, 14.1.

Ethyl 5-(furan-2-yl)-1,2,3-thiadiazole-4-carboxylate (**1k**) <sup>3a</sup> [CAS No. 2022219-65-2]  
Brown solid, 1.47 g, 67% yield over three steps, m.p. 109–110 °C,  $R_f = 0.55$  (PE/EA = 5:1,  $v/v$ ).  $^1\text{H}$  NMR (400 MHz,  $\text{CDCl}_3$ )  $\delta$  7.81 (dd,  $J = 3.7, 0.7$  Hz, 1H), 7.60 (dd,  $J = 1.9, 0.8$  Hz, 1H), 6.59 (dd,  $J = 3.7, 1.8$  Hz, 1H), 4.52 (q,  $J = 7.1$  Hz, 2H), 1.46 (t,  $J = 7.1$  Hz, 3H).  $^{13}\text{C}$  NMR{ $^1\text{H}$ } (101 MHz,  $\text{CDCl}_3$ )  $\delta$  160.7, 150.5, 146.5, 144.8, 143.0, 117.1, 113.3, 62.1, 14.2.

Ethyl 5-(thiophen-2-yl)-1,2,3-thiadiazole-4-carboxylate (**1l**) <sup>3a</sup> [CAS No. 2010973-34-7]  
Brown solid, 2.13 g, 89% yield over three steps, m.p. 96–97 °C,  $R_f = 0.3$  (PE/EA = 10:1,  $v/v$ ),  $R_f = 0.40$  (DCM/MeOH = 200:1,  $v/v$ ).  $^1\text{H}$  NMR (400 MHz,  $\text{CDCl}_3$ )  $\delta$  7.68 (dd,  $J = 3.8, 1.2$  Hz, 1H), 7.59 (dd,  $J = 5.1, 1.2$  Hz, 1H), 7.12 (dd,  $J = 5.2, 3.8$  Hz, 1H), 4.49 (q,  $J = 7.1$



Hz, 2H), 1.42 (t,  $J = 7.1$  Hz, 3H).  $^{13}\text{C}$  NMR{ $^1\text{H}$ } (101 MHz,  $\text{CDCl}_3$ )  $\delta$  160.7, 155.0, 146.2, 133.1, 131.8, 128.2, 125.9, 62.2, 14.1

Ethyl 5-(naphthalen-2-yl)-1,2,3-thiadiazole-4-carboxylate (**1m**)<sup>1</sup> [CAS No. 2342602-64-4]  
Brown solid, 1.47 g, 66% yield over three steps, m.p. 50–52 °C,  $R_f = 0.4$  (PE/EA = 10:1, v/v).  $^1\text{H}$  NMR (400 MHz,  $\text{CDCl}_3$ )  $\delta$  8.00–7.97 (m, 1H), 7.90–7.82 (m, 3H), 7.55–7.51 (m, 3H), 4.43–4.36 (m, 2H), 1.31–1.26 (m, 3H).  $^{13}\text{C}$  NMR{ $^1\text{H}$ } (101 MHz,  $\text{CDCl}_3$ )  $\delta$  161.8, 160.2, 148.2, 133.6, 132.4, 129.7, 128.2, 128.1, 127.6, 127.6, 126.9, 126.3, 123.2, 61.9, 13.9. IR (film) 2979, 2924, 2359, 2342, 1731, 1684, 1653, 1636, 1597, 1558, 1541, 1507, 1490, 1473, 1457, 1371, 1320, 1273, 1243, 1195, 1178, 1130, 1076, 1019, 963, 861, 816, 785, 747, 556, 475  $\text{cm}^{-1}$ . HRMS (ESI-TOF)  $m/z$   $[\text{M}+\text{H}]^+$  calcd. for  $\text{C}_{15}\text{H}_{13}\text{N}_2\text{O}_2\text{S}^+$  285.0692, found 285.0690.

## 5. General procedure for the synthesis of alk-2-enals **2**

Alk-2-enals **2j**, **2l**, **2m**, **2n**, **2o**, **2p** were synthesized according to Christmann's procedure.<sup>4a</sup>

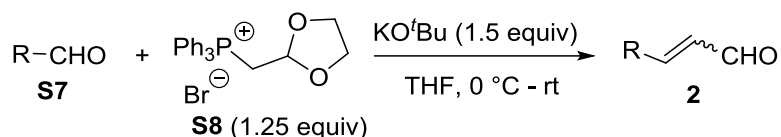

To an oven-dried flask with a stirrer bar was added (1,3-dioxolan-2-ylmethyl) triphenylphosphonium bromide (**S8**) (1.08 g, 2.5 mmol). The vial was sealed with a nitrogen gas balloon and cooled to 0 °C, after which dry THF (7 mL) and  $\text{KO}^t\text{Bu}$  (1 M in THF, 3 mL, 3 mmol) were added until the suspension turned a deep yellow color. After 30 min, a solution of aldehyde **S7** (2 mmol) in dry THF (5 mL) was added. The reaction mixture was kept stirring at room temperature for 6 h. After addition of 20% aqueous oxalic acid (20 mL), the resulting solution was kept stirring for another 8 h. The mixture was extracted with EA (10 mL  $\times$  3). The combined organic phase was washed with saturated aqueous  $\text{NaHCO}_3$  and dried over  $\text{Na}_2\text{SO}_4$ . After concentrated *in vacuo*, the resulting residue was purified by silica gel column chromatography with a mixture of PE and EA as eluent to give alk-2-enal **2**.

(*E*)-3-(2,3-Dichlorophenyl)propenal (**2j**)<sup>4b</sup> [CAS No. 78444-18-5]

White solid, 334 mg, 83% yield, m.p. 95–97 °C (Lit.<sup>23b</sup> 94–95 °C),  $R_f = 0.3$  (PE/EA = 10:1, v/v).  $^1\text{H}$  NMR (400 MHz,  $\text{CDCl}_3$ ):  $\delta$  9.78 (d,  $J = 7.6$  Hz, 1H), 7.94 (d,  $J = 16.0$  Hz, 1H), 7.58–7.53 (m, 2H), 7.30–7.26 (m, 1H), 6.69 (dd,  $J = 16.0, 7.6$  Hz, 1H).  $^{13}\text{C}$  NMR{ $^1\text{H}$ } (101 MHz,  $\text{CDCl}_3$ ):  $\delta$  193.2, 147.7, 134.4, 134.3, 133.2, 132.4, 131.6, 127.6, 126.0.

(*E*)-3-(Naphthalen-2-yl)propenal (**2l**)<sup>4c</sup> [CAS No. 113388-98-0]

Colorless solid, 346 mg, 38 % yield (from 5 mmol scale reaction), m.p. 124–126 °C (Lit.<sup>23c</sup> 125–126 °C),  $R_f = 0.6$  (PE/EA = 5:1, v/v).  $^1\text{H}$  NMR (400 MHz,  $\text{CDCl}_3$ )  $\delta$  9.77 (d,  $J = 7.7$  Hz, 1H), 8.02–7.98 (m, 1H), 7.91–7.85 (m, 3H), 7.71–7.61 (m, 2H), 7.59–7.51 (m, 2H), 6.84 (dd,  $J = 15.9, 7.7$  Hz, 1H).  $^{13}\text{C}$  NMR{ $^1\text{H}$ } (101 MHz,  $\text{CDCl}_3$ ):  $\delta$  193.7, 152.8, 134.7, 133.2, 131.6, 130.7, 130.0, 128.8, 128.7, 127.9, 127.8, 127.0, 123.5.

(*E*)-5-Phenylpenta-2,4-dienal (**2m**)<sup>4d</sup> [CAS No. 24163-63-1]

Brown oil, 270 mg, 85% yield,  $R_f = 0.3$  (PE/EA = 5:1, *v/v*). <sup>1</sup>H NMR (400 MHz, CDCl<sub>3</sub>):  $\delta$  9.62 (d,  $J = 8.0$  Hz, 1H), 7.53–7.47 (m, 2H), 7.41–7.33 (m, 3H), 7.30–7.22 (m, 1H), 7.03–6.98 (m, 2H), 6.27 (dd,  $J = 15.3, 7.9$  Hz, 1H). <sup>13</sup>C NMR{<sup>1</sup>H} (101 MHz, CDCl<sub>3</sub>):  $\delta$  193.5, 152.0, 142.4, 135.5, 131.6, 129.6, 128.9, 127.5, 126.1.

(*E*)-3-((1*R*,5*R*)-6,6-Dimethylbicyclo[3.1.1]hept-2-en-3-yl)propenal (**2n**)

Pale yellow oil, 318 mg, 90% yield,  $R_f = 0.6$  (PE/EA = 5:1, *v/v*). <sup>1</sup>H NMR (400 MHz, CDCl<sub>3</sub>):  $\delta$  9.57 (d,  $J = 7.8$  Hz, 1H), 7.09 (d,  $J = 15.6$  Hz, 1H), 6.19–6.17 m, 1H), 6.05 (dd,  $J = 15.6, 7.8$  Hz, 1H), 2.59–2.44 (m, 4H), 2.19–2.16 (m, 1H), 1.34 (s, 3H), 1.15 (d,  $J = 9.0$  Hz, 1H), 0.77 (s, 3H). <sup>13</sup>C NMR{<sup>1</sup>H} (101 MHz, CDCl<sub>3</sub>):  $\delta$  194.2, 153.2, 146.2, 136.8, 125.5, 41.4, 40.5, 37.8, 32.9, 31.1, 26.0, 20.7. IR (film): 2926, 2821, 1680, 1612, 1180, 1155, 1121, 1075, 1042, 1011, 969, 581 cm<sup>-1</sup>; HRMS (ESI-TOF)  $m/z$  [M + H]<sup>+</sup> calcd. for C<sub>12</sub>H<sub>7</sub>O<sup>+</sup> 177.1274, found 177.1281.

(*E*)-3-Cyclohexylpropenal (**2o**)<sup>4e</sup> [CAS No. 37868-74-9]

Pale yellow oil, 196 mg, 76% yield,  $R_f = 0.8$  (PE/EA = 5:1, *v/v*). <sup>1</sup>H NMR (400 MHz, CDCl<sub>3</sub>):  $\delta$  9.49 (d,  $J = 7.9$  Hz, 1H), 6.77 (dd,  $J = 15.7, 6.5$  Hz, 1H), 6.06 (ddd,  $J = 15.7, 7.8, 1.4$  Hz, 1H), 2.31–2.22 (m, 1H), 1.87–1.74 (m, 5H), 1.37–1.15 (m, 5H). <sup>13</sup>C NMR{<sup>1</sup>H} (101 MHz, CDCl<sub>3</sub>):  $\delta$  194.5, 163.8, 130.5, 40.8, 31.5, 25.8, 25.6.

(*E*)-4-Phenylpent-2-enal (**2p**)<sup>4f</sup> [CAS No. 1259027-51-4]

Pale yellow oil, 225 mg, 70% yield,  $R_f = 0.2$  (PE/EA = 20:1, *v/v*). <sup>1</sup>H NMR (400 MHz, CDCl<sub>3</sub>):  $\delta$  9.55 (d,  $J = 7.8$  Hz, 1H), 7.39–7.26 (m, 3H), 7.25–7.19 (m, 2H), 6.97 (dd,  $J = 15.7, 6.4$  Hz, 1H), 6.13 (ddd,  $J = 15.7, 7.8, 1.5$  Hz, 1H), 3.79–3.71 (m, 1H), 1.49 (d,  $J = 7.1$  Hz, 3H). <sup>13</sup>C NMR{<sup>1</sup>H} (101 MHz, CDCl<sub>3</sub>):  $\delta$  194.0, 161.7, 142.6, 131.2, 128.8, 128.1, 127.3, 127.0, 42.5, 19.9.

Alk-2-enals **2s**, **2t**, **2y**, and **12** were synthesized according to Jørgensen's procedure.<sup>5a</sup>

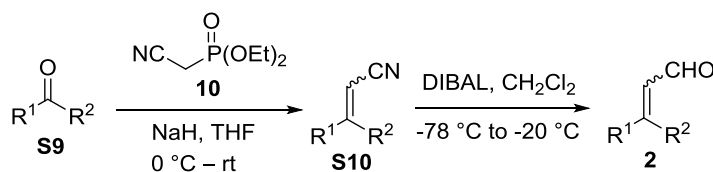

In a flask with a stirrer bar, diethyl cyanomethylphosphonate (**10**) (1.14 g, 6.43 mmol) was dissolved in 10 mL of dry tetrahydrofuran. The flask was cooled to 0 °C and sodium hydride (320 mg, 60% in mineral oil, 8 mmol) was slowly added, followed by addition of a solution of ketone **S9** (6.125 mmol) in 5 mL of dry tetrahydrofuran. The resulting solution was kept stirring under room temperature for 2 h. After the reaction was completed, the mixture was extracted with CH<sub>2</sub>Cl<sub>2</sub> (10 mL × 3). The combined organic phase was washed with water (10 mL × 3) and dried over Na<sub>2</sub>SO<sub>4</sub>. After concentrated *in vacuo*, the resulting residue was dissolved in CH<sub>2</sub>Cl<sub>2</sub> (5 mL) and DIBAL (1 M in cyclohexane, 8 mL, 8 mmol) was added dropwise at -78 °C under nitrogen atmosphere. The reaction mixture was kept at -20 °C

for 2 h and monitored by TLC. After reaction was completed, EA (10 mL) was added to quench the remaining DIBAL. The reaction mixture was warmed up to room temperature followed by addition of another 10 mL of EA and 10 mL of saturated potassium sodium tartrate aqueous solution. The suspension was stirred vigorously for 4 h to give a biphasic mixture, which was extracted with EA (10 mL × 3). The organic layer was combined and dried over Na<sub>2</sub>SO<sub>4</sub>, then concentrated *in vacuo*. The residue was purified by silica gel column chromatography (PE/EA = 10:1~20:1, *v/v*) to give the corresponding alk-2-enal **2**.

(*E*)-3-Phenylbut-2-enal (**2s**)<sup>5b</sup> [CAS No. 21866-70-6]

Pale yellow oil, 1.13 g, 77% yield over two steps, *R<sub>f</sub>* = 0.3 (PE/EA = 10:1, *v/v*). <sup>1</sup>H NMR (400 MHz, CDCl<sub>3</sub>): δ 10.18 (d, *J* = 7.9 Hz, 1H), 7.58–7.51 (m, 2H), 7.44–7.39 (m, 3H), 6.40 (dq, *J* = 7.9, 1.3 Hz, 1H), 2.58 (d, *J* = 1.3 Hz, 3H). <sup>13</sup>C NMR{<sup>1</sup>H} (101 MHz, CDCl<sub>3</sub>): δ 191.3, 157.7, 140.5, 130.1, 128.7, 127.2, 126.2, 16.4.

3-Cyclopropylbut-2-enal (**2t**)<sup>5c</sup> [CAS No. 59819-87-3]

Pale yellow oil, 1.00 g, 90% yield over two steps, *R<sub>f</sub>* = 0.4 (pentane/acetone = 10:1, *v/v*), *E/Z* = 2/1. <sup>1</sup>H NMR (400 MHz, CDCl<sub>3</sub>): δ 10.10 (d, *J* = 8.1 Hz, 0.5H), 9.90 (d, *J* = 8.1 Hz, 1H), 5.87 (d, *J* = 8.1 Hz, 0.5H), 5.83 (d, *J* = 8.1 Hz, 1H), 1.96 (s, 3H), 1.59 (s, 1.5H), 0.94–0.79 (m, 5H), 0.77–0.70 (m, 2.5H). <sup>13</sup>C NMR{<sup>1</sup>H} (101 MHz, CDCl<sub>3</sub>): δ 190.2, 166.0, 164.5, 128.6, 124.9, 20.0, 19.1, 14.2, 13.3, 8.0, 7.1, 5.4, 0.9.

(2-Cyclohexenylidene)acetaldehyde (**2y**)<sup>5e</sup> [CAS No. 106019-07-2]

Pale yellow oil, 691 mg, 57% yield over two steps, *R<sub>f</sub>* = 0.7 (PE/EA = 5:1, *v/v*), *E/Z* = 2/1. <sup>1</sup>H NMR (400 MHz, CDCl<sub>3</sub>): δ 10.10 (d, *J* = 8.2 Hz, 0.5 H), 10.03 (d, *J* = 8.2 Hz, 1 H), 7.08 (d, *J* = 10.0 Hz, 0.5 H), 6.35–6.28 (m, 1.5 H), 6.20–6.17 (m, 1H), 5.71 (d, *J* = 8.3 Hz, 1H), 5.64 (d, *J* = 8.3 Hz, 0.5 H), 2.90–2.82 (m, 2H), 2.49–2.41 (m, 1 H), 2.28–2.20 (m, 3 H), 1.82–1.75 (m, 3 H). <sup>13</sup>C NMR{<sup>1</sup>H} (101 MHz, CDCl<sub>3</sub>): δ 190.9, 189.8, 156.1, 140.1, 140.0, 130.2, 125.6, 124.4, 122.8, 32.4, 26.9, 26.0, 25.3, 22.6, 22.2, 21.8.

2-((8*S*,9*S*,10*R*,13*S*,14*S*)-10,13-Dimethyl-1,2,7,8,9,10,11,12,13,14,15,16-dodecahydro-17*H*-cyclopenta[*a*]phenanthren-17-ylidene)acetaldehyde (**12**)

Yellow solid, 56 % yield over the last two steps, m.p. 158–159 °C, *R<sub>f</sub>* = 0.7 (PE/EA = 5:1, *v/v*), *E/Z* = 2/1. <sup>1</sup>H NMR (400 MHz, CDCl<sub>3</sub>): δ 10.14 (d, *J* = 8.7 Hz, 0.35H), 9.86 (d, *J* = 8.0 Hz, 0.63H), 5.91 (d, *J* = 9.6 Hz, 1H), 5.82 (d, *J* = 7.9 Hz, 0.34H), 5.75 (d, *J* = 7.9 Hz, 0.68H), 5.59 (t, *J* = 7.7 Hz, 1H), 5.40–5.34 (m, 1H), 3.02–2.77 (m, 1H), 2.41–2.04 (m, 4H), 1.93–1.68 (m, 8H), 1.65–1.26 (m, 4H), 1.24–1.04 (m, 4H), 0.96 (s, 3H), 0.89 (s, 3H). <sup>13</sup>C NMR{<sup>1</sup>H} (101 MHz, CDCl<sub>3</sub>): δ 192.2, 190.6, 180.0, 178.9, 141.4, 128.71, 128.68, 125.2, 125.2, 124.1, 122.3, 122.2, 119.4, 55.7, 53.6, 48.4, 47.7, 46.4, 38.7, 35.2, 34.7, 33.62, 33.56, 33.4, 31.4, 31.31, 31.26, 27.6, 24.2, 22.9, 21.2, 20.7, 18.9, 18.73, 18.67, 18.0. IR (film): 2944, 1668, 1454, 1374, 1264, 1142, 1024, 906, 861, 755, 735, 702, 666 cm<sup>-1</sup>. HRMS (ESI-TOF) *m/z* [M+Na]<sup>+</sup> calcd. for C<sub>12</sub>H<sub>28</sub>NaO<sup>+</sup> 319.2032, found 319.2029.

Cinnamaldehyde-1-*d* (**2g-d**) was synthesized according to Pierre's procedure.<sup>6</sup>

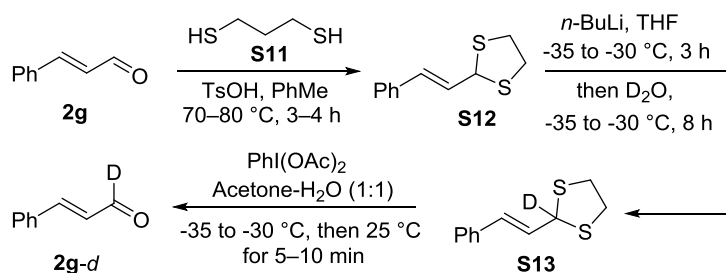

1) In a flask with a stir-bar, cinnamic aldehyde (**2g**) (1.32 g, 10 mmol), propane-1,3-dithiol (**S11**) (1.30 g, 12 mmol), and 4-methylbenzenesulfonic acid monohydrate (86 mg, 0.5 mmol) were dissolved in 20 mL of toluene. The reaction mixture was heated to 70–80 °C and kept stirring for 3–4 h. After the completion of the reaction and removal of solvent by rotary evaporation the resulting residue was purified by silica gel column chromatography (PE/EA = 50:1, *v/v*) to give pale yellow oil (*E*)-2-styryl-1,3-dithiolane (**S12**).

2) To an oven-dried flask with a stirrer bar and sealed with a nitrogen gas balloon were added above prepared (*E*)-2-styryl-1,3-dithiolane (**S12**) and dry THF (10 mL). The reaction mixture was cooled down to -35 to -30 °C. After addition of *n*-BuLi (1.6 M in THF, 12.5 mL, 20 mmol) dropwise the reaction mixture was stirred for 3 h. Then D<sub>2</sub>O (1.0 mL, 50 mmol) was added and the reaction mixture was further stirred at -35 to -30 °C for 8 h. After the completion of the reaction and removal of solvent THF by rotary evaporation the resulting residue was extracted with CH<sub>2</sub>Cl<sub>2</sub> (10 mL × 3). The organic layer was combined and concentrated *in vacuo*. The residue was purified by silica gel column chromatography (PE/EA = 50:1, *v/v*) to give pale yellow oil (*E*)-2-styryl-1,3-dithiolane-2-*d* (**S13**) 1.345 g (60% yield).

3) To a flask with a stirrer bar were added the above prepared (*E*)-2-styryl-1,3-dithiolane-2-*d* (**S12**) (1.2 g, 6 mmol) and solvent (acetone: H<sub>2</sub>O = 1:1, 15 mL). The flask was cooled down to -35 to -30 °C. After addition of (diacetoxyiodo)benzene (4.83 g, 15 mmol) the flask was heated in an oil bath at 25 °C for 5–10 mins. After the reaction was completed and removal of solvent acetone by rotary evaporation the resulting residue was extracted with CH<sub>2</sub>Cl<sub>2</sub> (10 mL × 3). The organic layer was combined and concentrated *in vacuo*. The residue was purified by silica gel column chromatography (PE/EA = 20:1, *v/v*) to give pale yellow oil cinnamaldehyde-1-*d* (**2g-d**) (>99%D) 649 mg (60% yield).

(*E*)-Cinnamaldehyde-1-*d* (**2g-d**)<sup>6</sup> [CAS No. 77249-46-8]

Pale yellow oil, 649 mg, 36% overall yield, *R*<sub>f</sub> = 0.2 (PE/EA = 10/1, *v/v*). <sup>1</sup>H NMR (400 MHz, CDCl<sub>3</sub>): δ 7.61–7.55 (m, 2H), 7.48 (d, *J* = 16.0 Hz, 1H), 7.44 (dd, *J* = 5.0, 2.0 Hz, 3H), 6.72 (d, *J* = 16.0 Hz, 1H). <sup>13</sup>C NMR{<sup>1</sup>H} (101 MHz, CDCl<sub>3</sub>): δ 193.4 (t, *J*<sub>C-D</sub> = 26.2 Hz), 152.7, 134.0, 131.2, 129.1, 128.6, 128.5, 128.5. IR (film): 2359, 2341, 1698, 1669, 1654, 1636, 1623, 1575, 1558, 1541, 1520, 1507, 1489, 1456, 1448, 1194, 1144, 1074, 1052, 1032, 997, 975, 739, 687 cm<sup>-1</sup>. HRMS (ESI-TOF) *m/z* [M+H]<sup>+</sup> calcd. for C<sub>9</sub>H<sub>8</sub>DO<sup>+</sup> 134.0711, found 134.0713.

(*Z*)-3-Phenylacrylaldehyde [(*Z*)-**2g**] was synthesized according to Lindlar's procedure.<sup>7</sup>

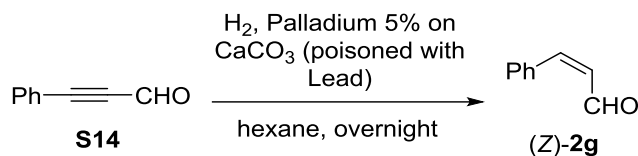

To an oven-dried vial with a stirrer bar was added palladium 5% on calcium carbonate (poisoned with lead) (10 mg, 0.1 mmol). The vial was sealed with a nitrogen balloon and then gas was exchanged with a hydrogen balloon (1 atm). After addition of 3-phenylpropionaldehyde (**S14**) (260 mg, 2 mmol) and hexane (1.5 mL), the reaction mixture was stirred overnight at room temperature. After the reaction was completed and removal of solvent hexane by rotary evaporation the resulting residue was purified by silica gel column chromatography to give (Z)-3-phenylacrylaldehyde [(Z)-**2g**] 165mg (30 % yield).

(Z)-3-Phenylacrylaldehyde [(Z)-**2g**] <sup>7</sup> [CAS No. 57194-69-1]

Pale yellow oil, 165 mg, 30% yield,  $R_f = 0.5$  (PE/EA = 10:1, v/v). <sup>1</sup>H NMR (400 MHz, CDCl<sub>3</sub>):  $\delta$  9.98 (d,  $J = 8.1$  Hz, 1H), 7.63 (d,  $J = 11.6$  Hz, 1H), 7.45–7.39 (m, 5H), 6.20 (dd,  $J = 11.6, 8.1$  Hz, 1H). <sup>13</sup>C NMR{<sup>1</sup>H} (101 MHz, CDCl<sub>3</sub>):  $\delta$  192.5, 148.6, 134.2, 130.5, 129.8, 129.7, 128.6.

## 6. General procedure for the synthesis of ethyl 4-oxo-3,4-dihydro-2H-thiopyran-5-carboxylates **3** and **13**

*Conditions A:* This procedure is used for the preparation of **3aa**, **3ac-3af**, **3ah-3at**, **3ay**, **3aac**, **3aad**, **3ba**, **3ea**, and **3ma**.

To an oven-dried 10 mL-vial with a stirring bar were added 1,2,3-thiadiazole **1** (0.25 mmol), catalyst [Rh(COD)Cl]<sub>2</sub> (6.2 mg, 5 mol%), ligand DPPF (16.6 mg, 12 mol%), and pre-dried solvent PhCl (1 mL). The vial was sealed with a nitrogen gas balloon, then alkenal **2** (0.5 mmol) was added via a syringe. The reaction mixture was kept stirring at 130 °C in an oil-bath for 6 h. After the reaction mixture was cooled to room temperature, the solvent was removed by rotary evaporation. The resulting residue was purified by silica gel column chromatography (PE/EA = 5:1~20:1, v/v) to give desired product **3**.

*Conditions B:* This modification is used for the preparation of **3ca**, **3fa**, **3ga**, **3ha**, **3ia**, **3ja**, **3ka**, and **3la**.

To an oven-dried 10 mL-vial with a stirring bar were added 1,2,3-thiadiazole **1** (0.10 mmol), catalyst [Rh(COD)Cl]<sub>2</sub> (12.4 mg, 10 mol%), ligand DPPF (33.2 mg, 24 mol%), additive AgBF<sub>4</sub> (9.7 mg, 20 mol%), and pre-dried solvent PhCl (0.5 mL). The vial was sealed with a nitrogen gas balloon, then alkenal **2** (0.3 mmol) was added via a syringe. The reaction mixture was kept stirring at 130 °C in an oil-bath for 6 h. After the reaction mixture was cooled to room temperature, the solvent was removed by rotary evaporation. The resulting residue was purified by silica gel column chromatography (PE/EA = 5:1~20:1, v/v) to give desired product **3**.

*Conditions C:* This modification was used for the preparation of **3ab**.

To an oven-dried 10 mL-vial with a stirring bar were added 1,2,3-thiadiazole **1a** (0.10 mmol, 23.4 mg), catalyst [Rh(COD)Cl]<sub>2</sub> (2.5 mg, 5 mol%), ligand DPPF (6.7 mg, 12 mol%), and

pre-dried solvent PhCl (1 mL). The vial was sealed with a nitrogen gas balloon, then alkenal **2b** (0.4 mmol, 22.4 mg) was added via a syringe. The reaction mixture was kept stirring at 130 °C in an oil-bath for 6 h. After the reaction mixture was cooled to room temperature, the solvent was removed by rotary evaporation. The resulting residue was purified by silica gel column chromatography (PE/EA = 5:1, v/v) to give desired product **3ab**.

*Conditions D:* This modification was used for the preparation of **3aae**.

To an oven-dried 10 mL-vial with a stirring bar were added 1,2,3-thiadiazole **1a** (0.25 mmol, 58.6 mg), catalyst [Rh(COD)Cl]<sub>2</sub> (12.3 mg, 10 mol%), ligand DPPF (33.2 mg, 24 mol%), and pre-dried solvent PhCl (1 mL). The vial was sealed with a nitrogen gas balloon, then alkenal **2ae** (0.5 mmol, 73.0 mg) was added via a syringe. The reaction mixture was kept stirring at 130 °C in an oil-bath for 12 h. After the reaction mixture was cooled to room temperature, the solvent was removed by rotary evaporation. The resulting residue was purified by silica gel column chromatography (PE/EA = 10:1, v/v) to give desired product **3aae**

Ethyl 2,2-dimethyl-4-oxo-6-phenyl-3,4-dihydro-2*H*-thiopyran-5-carboxylate (**3aa**)

Prepared under *Condition A* on 0.25 mmol scale. Colorless crystal, 52 mg, 72% yield,  $R_f = 0.2$  (PE/EA = 5:1, v/v), m.p. 105–107 °C. <sup>1</sup>H NMR (400 MHz, CDCl<sub>3</sub>): δ 7.47–7.31 (m, 5H), 3.97 (q,  $J = 7.1$  Hz, 2H), 2.75 (s, 2H), 1.52 (s, 6H), 0.88 (t,  $J = 7.1$  Hz, 3H). <sup>13</sup>C NMR{<sup>1</sup>H} (101 MHz, CDCl<sub>3</sub>): δ 191.5, 165.9, 160.8, 136.5, 130.4, 128.4, 127.8, 126.9, 61.1, 51.2, 45.6, 27.7, 13.5.

Ethyl 4-oxo-6-phenyl-3,4-dihydro-2*H*-thiopyran-5-carboxylate (**3ab**)

Prepared under *Conditions C* on 0.10 mmol scale. Brown oil, 17 mg, 65% yield,  $R_f = 0.3$  (PE/EA = 5:1, v/v). <sup>1</sup>H NMR (400 MHz, CDCl<sub>3</sub>): δ 7.85–7.69 (m, 5H), 4.32 (q,  $J = 7.1$  Hz, 2H), 3.64 (dd,  $J = 8.0, 8.0$  Hz, 2H), 3.19 (dd,  $J = 8.0, 8.0$  Hz, 2H), 1.25 (t,  $J = 7.1$  Hz, 3H). <sup>13</sup>C NMR{<sup>1</sup>H} (101 MHz, CDCl<sub>3</sub>): δ 190.5, 165.8, 162.1, 136.5, 130.7, 128.5, 128.2, 127.9, 61.2, 36.3, 27.0, 13.6. IR (film): 2960, 2924, 1724, 1657, 1544, 1486, 1443, 1365, 1332, 1298, 1233, 1210, 1173, 1094, 1047, 1017, 940, 914, 840 cm<sup>-1</sup>. HRMS (ESI-TOF)  $m/z$  [M+H]<sup>+</sup> calcd. for C<sub>14</sub>H<sub>15</sub>O<sub>3</sub>S<sup>+</sup> 263.0736, found 263.0738.

Ethyl 2-(4-(dimethylamino)phenyl)-4-oxo-6-phenyl-3,4-dihydro-2*H*-thiopyran-5-carboxylate (**3ac**)

Prepared under *Conditions A* on 0.25 mmol scale. Brown oil, 73 mg, 77% yield,  $R_f = 0.15$  (PE/EA = 5:1, v/v). <sup>1</sup>H NMR (400 MHz, CDCl<sub>3</sub>): δ 7.55–7.35 (m, 5H), 7.26 (d,  $J = 8.8$  Hz, 2H), 6.71 (d,  $J = 8.8$  Hz, 2H), 4.74 (dd,  $J = 14.8, 3.2$  Hz, 1H), 4.04–4.00 (m, 2H), 3.23 (dd,  $J = 15.4, 15.4$  Hz, 1H), 3.01 (dd,  $J = 16.0, 2.6$  Hz, 1H), 2.96 (s, 6H), 0.94 (t,  $J = 7.1$  Hz, 3H). <sup>13</sup>C NMR{<sup>1</sup>H} (101 MHz, CDCl<sub>3</sub>): δ 191.7, 166.0, 162.7, 150.6, 136.3, 130.6, 128.5, 128.2, 127.9, 127.8, 123.8, 112.4, 61.1, 46.1, 44.0, 40.3, 13.6. IR (film): 2979, 2897, 2805, 1728, 1658, 1611, 1524, 1484, 1444, 1362, 1323, 1228, 1210, 1166, 1142, 1095, 1038, 945, 915, 847, 818 cm<sup>-1</sup>. HRMS (ESI-TOF)  $m/z$  [M+H]<sup>+</sup> calcd. for C<sub>20</sub>H<sub>24</sub>NO<sub>3</sub>S<sup>+</sup> 382.1471, found 382.1472.

Ethyl 2-(4-methoxyphenyl)-4-oxo-6-phenyl-3,4-dihydro-2*H*-thiopyran-5-carboxylate (**3ad**)  
Prepared under *Conditions A* on 0.25 mmol scale. Brown oil, 72 mg, 78% yield,  $R_f = 0.3$  (PE/EA = 5:1, *v/v*).  $^1\text{H}$  NMR (400 MHz,  $\text{CDCl}_3$ ):  $\delta$  7.53–7.35 (m, 5H), 7.33 (d,  $J = 8.3$  Hz, 2H), 6.91 (d,  $J = 8.3$  Hz, 2H), 4.76 (dd,  $J = 14.5, 2.8$  Hz, 1H), 4.03–3.99 (m, 2H), 3.80 (s, 3H), 3.21 (dd,  $J = 16.0, 14.4$  Hz, 1H), 3.01 (dd,  $J = 15.9, 2.8$  Hz, 1H), 0.93 (t,  $J = 7.1$  Hz, 3H).  $^{13}\text{C}$  NMR{ $^1\text{H}$ } (101 MHz,  $\text{CDCl}_3$ ):  $\delta$  191.2, 165.9, 162.2, 159.8, 136.1, 130.7, 128.8, 128.6, 128.5, 127.890, 127.887, 114.4, 61.2, 55.3, 45.7, 43.9, 13.6. IR (film): 2979, 2932, 1728, 1659, 1609, 1580, 1513, 1486, 1463, 1443, 1365, 1321, 1303, 1254, 1225, 1180, 1144, 1113, 1095, 1037, 946, 915, 852, 833  $\text{cm}^{-1}$ . HRMS (ESI-TOF)  $m/z$   $[\text{M}+\text{H}]^+$  calcd. for  $\text{C}_{20}\text{H}_{21}\text{O}_4\text{S}^+$  369.1155, found 369.1154.

Ethyl 2-(3-methoxyphenyl)-4-oxo-6-phenyl-3,4-dihydro-2*H*-thiopyran-5-carboxylate (**3ae**)  
Prepared under *Conditions A* on 0.25 mmol scale. Brown oil, 76 mg, 83% yield,  $R_f = 0.2$  (PE/EA = 5:1, *v/v*).  $^1\text{H}$  NMR (400 MHz,  $\text{CDCl}_3$ ):  $\delta$  7.53–7.48 (m, 2H), 7.46–7.34 (m, 3H), 7.32–7.26 (m, 1H), 7.01–6.86 (m, 3H), 4.77 (dd,  $J = 14.3, 3.0$  Hz, 1H), 4.03–3.98 (m, 2H), 3.80 (s, 3H), 3.20 (dd,  $J = 15.9, 14.3$  Hz, 1H), 3.03 (dd,  $J = 16.0, 3.0$  Hz, 1H), 0.93 (t,  $J = 7.2$  Hz, 3H).  $^{13}\text{C}$  NMR{ $^1\text{H}$ } (101 MHz,  $\text{CDCl}_3$ ):  $\delta$  190.9, 165.7, 161.9, 159.9, 138.4, 136.0, 130.7, 130.2, 128.5, 127.9, 119.6, 114.1, 113.2, 61.2, 55.2, 46.1, 43.6, 13.5. IR (film): 2978, 1729, 1659, 1599, 1585, 1550, 1492, 1463, 1442, 1365, 1321, 1250, 1228, 1211, 1147, 1106, 1039, 1027, 946, 915  $\text{cm}^{-1}$ . HRMS (ESI-TOF)  $m/z$   $[\text{M}+\text{K}]^+$  calcd. for  $\text{C}_{21}\text{H}_{20}\text{KO}_4\text{S}^+$  407.0714, found 407.0724.

Ethyl 2-(2-methoxyphenyl)-4-oxo-6-phenyl-3,4-dihydro-2*H*-thiopyran-5-carboxylate (**3af**)  
Prepared under *Conditions A* on 0.25 mmol scale. Brown oil, 73 mg, 80% yield,  $R_f = 0.3$  (PE/EA = 5:1, *v/v*).  $^1\text{H}$  NMR (400 MHz,  $\text{CDCl}_3$ ):  $\delta$  7.55–7.47 (m, 2H), 7.47–7.28 (m, 5H), 7.02–6.89 (m, 2H), 5.29 (dd,  $J = 13.6, 3.2$  Hz, 1H), 4.05–3.99 (m, 2H), 3.87 (s, 3H), 3.22 (dd,  $J = 15.9, 13.6$  Hz, 1H), 2.97 (dd,  $J = 16.0, 3.2$  Hz, 1H), 0.94 (t,  $J = 7.1$  Hz, 3H).  $^{13}\text{C}$  NMR{ $^1\text{H}$ } (101 MHz,  $\text{CDCl}_3$ ):  $\delta$  191.6, 166.0, 162.8, 156.8, 136.4, 130.6, 129.7, 128.5, 127.93, 127.88, 127.5, 125.2, 120.9, 111.0, 61.1, 55.5, 42.8, 39.6, 13.6. IR (film): 3057, 2978, 1728, 1660, 1599, 1584, 1550, 1490, 1443, 1365, 1318, 1267, 1232, 1213, 1158, 1094, 1039, 946, 915, 877  $\text{cm}^{-1}$ . HRMS (ESI-TOF)  $m/z$   $[\text{M}+\text{H}]^+$  calcd. for  $\text{C}_{21}\text{H}_{21}\text{O}_4\text{S}^+$  369.1155, found 369.1148.

Ethyl 2-(4-fluorophenyl)-4-oxo-6-phenyl-3,4-dihydro-2*H*-thiopyran-5-carboxylate (**3ah**)  
Prepared under *Conditions A* on 0.25 mmol scale. Yellow oil, 67 mg, 75% yield,  $R_f = 0.3$  (PE/EA = 5:1, *v/v*).  $^1\text{H}$  NMR (400 MHz,  $\text{CDCl}_3$ ):  $\delta$  7.50 (d,  $J = 7.6$  Hz, 2H), 7.45–7.36 (m, 5H), 7.10 (d,  $J = 8.4$  Hz, 1H), 7.07 (d,  $J = 8.4$  Hz, 1H), 4.79 (dd,  $J = 14.3, 2.8$  Hz, 1H), 4.09–3.93 (m, 2H), 3.19 (dd,  $J = 15.6, 14.8$  Hz, 1H), 3.02 (dd,  $J = 16.0, 3.0$  Hz, 1H), 0.92 (t,  $J = 7.2$  Hz, 3H).  $^{13}\text{C}$  NMR{ $^1\text{H}$ } (101 MHz,  $\text{CDCl}_3$ ):  $\delta$  190.8, 165.7, 162.4 (d,  $J_{\text{C-F}} = 249.5$  Hz), 161.8, 135.9, 132.7 (d,  $J_{\text{C-F}} = 3.3$  Hz), 130.8, 129.2 (d,  $J_{\text{C-F}} = 8.3$  Hz), 128.6, 127.95, 127.89, 116.1 (d,  $J_{\text{C-F}} = 21.7$  Hz), 61.3, 45.4, 43.7, 13.6.  $^{19}\text{F}$  NMR{ $^1\text{H}$ } (376 MHz,  $\text{CDCl}_3$ )  $\delta$  -112.3 (s). IR (film): 2981, 1728, 1660, 1603, 1550, 1509, 1486, 1444, 1416, 1366, 1319, 1225, 1160, 1144, 1097, 1039, 946, 915, 856, 838  $\text{cm}^{-1}$ . HRMS (ESI-TOF)  $m/z$   $[\text{M}+\text{H}]^+$  calcd. for

$C_{20}H_{18}FO_3S^+$  356.0882, found 356.0884.

Ethyl 2-(4-bromophenyl)-4-oxo-6-phenyl-3,4-dihydro-2H-thiopyran-5-carboxylate (**3ai**)

Prepared under *Conditions A* on 0.25 mmol scale. Brown oil, 75 mg, 72%,  $R_f = 0.3$  (PE/EA = 5:1, *v/v*).  $^1H$  NMR (400 MHz,  $CDCl_3$ ):  $\delta$  7.53–7.48 (m, 4H), 7.47 – 7.29 (m, 5H), 4.76 (dd,  $J = 14.0, 3.1$  Hz, 1H), 4.07–3.95 (m, 2H), 3.18 (dd,  $J = 15.9, 14.0$  Hz, 1H), 3.01 (dd,  $J = 15.9, 3.1$  Hz, 1H), 0.93 (t,  $J = 7.1$  Hz, 3H).  $^{13}C$  NMR{ $^1H$ } (101 MHz,  $CDCl_3$ ):  $\delta$  190.6, 165.6, 161.5, 136.0, 135.9, 132.3, 130.8, 129.1, 128.6, 128.0, 127.9, 122.8, 61.3, 45.5, 43.4, 13.6. IR (film): 2920, 2850, 1727, 1660, 1591, 1549, 1487, 1470, 1400, 1366, 1316, 1298, 1263, 1223, 1141, 1091, 1074, 1012, 929, 827  $cm^{-1}$ . HRMS (ESI-TOF)  $m/z$   $[M+Na]^+$  calcd. for  $C_{20}H_{17}BrNaO_3S^+$  438.9974, found 438.9965.

Ethyl 2-(2,3-dichlorophenyl)-4-oxo-6-phenyl-3,4-dihydro-2H-thiopyran-5-carboxylate (**3aj**)

Prepared under *Conditions A* on 0.25 mmol scale. Brown oil, 66 mg, 65% yield,  $R_f = 0.2$  (PE/EA = 5:1, *v/v*).  $^1H$  NMR (400 MHz,  $CDCl_3$ ):  $\delta$  7.57–7.29 (m, 8H), 5.33 (dd,  $J = 12.5, 3.6$  Hz, 1H), 4.06–3.99 (m, 2H), 3.19 (dd,  $J = 15.9, 12.5$  Hz, 1H), 3.06 (dd,  $J = 15.9, 3.7$  Hz, 1H), 0.95 (t,  $J = 7.1$  Hz, 3H).  $^{13}C$  NMR{ $^1H$ } (101 MHz,  $CDCl_3$ ):  $\delta$  190.2, 165.5, 161.3, 137.0, 135.8, 134.1, 132.1, 130.9, 130.6, 128.6, 128.0, 127.9, 127.8, 126.4, 61.3, 42.9, 42.5, 13.6. IR (film): 3060, 2979, 1729, 1661, 1597, 1553, 1486, 1451, 1421, 1365, 1309, 1279, 1223, 1181, 1159, 1095, 1040, 947, 915, 859  $cm^{-1}$ . HRMS (ESI-TOF)  $m/z$   $[M+H]^+$  calcd. for  $C_{20}H_{17}Cl_2O_3S^+$  407.0270, found 407.0274.

Ethyl 2-(4-nitrophenyl)-4-oxo-6-phenyl-3,4-dihydro-2H-thiopyran-5-carboxylate (**3ak**)

Prepared under *Conditions A* on 0.25 mmol scale. Brown oil, 40 mg, 39% yield,  $R_f = 0.15$  (PE/EA = 5:1, *v/v*).  $^1H$  NMR (400 MHz,  $CDCl_3$ ):  $\delta$  8.27 (d,  $J = 8.3$  Hz, 2H), 7.62 (d,  $J = 8.4$  Hz, 2H), 7.55–7.34 (m, 5H), 4.91 (dd,  $J = 13.4, 3.1$  Hz, 1H), 4.04–3.99 (m, 2H), 3.24 (dd,  $J = 15.8, 13.5$  Hz, 1H), 3.08 (dd,  $J = 15.8, 3.2$  Hz, 1H), 0.93 (t,  $J = 7.2$  Hz, 3H).  $^{13}C$  NMR{ $^1H$ } (101 MHz,  $CDCl_3$ ):  $\delta$  189.9, 165.4, 160.8, 148.0, 144.1, 135.6, 131.1, 128.7, 128.6, 128.2, 128.0, 124.4, 61.4, 45.2, 43.0, 13.6. IR (film): 3079, 2981, 2927, 1727, 1660, 1598, 1523, 1490, 1444, 1347, 1320, 1264, 1227, 1212, 1146, 1111, 1038, 946, 916, 856, 833  $cm^{-1}$ . HRMS (ESI-TOF)  $m/z$   $[M+H]^+$  calcd. for  $C_{20}H_{18}NO_5S^+$  384.0900, found 384.0900.

Ethyl 2-(naphthalen-2-yl)-4-oxo-6-phenyl-3,4-dihydro-2H-thiopyran-5-carboxylate (**3al**)

Prepared under *Conditions A* on 0.25 mmol scale. Brown oil, 67 mg, 69%,  $R_f = 0.4$  (PE/EA = 5:1, *v/v*).  $^1H$  NMR (400 MHz,  $CDCl_3$ ):  $\delta$  7.93–7.80 (m, 4H), 7.58–7.48 (m, 5H), 7.48–7.35 (m, 3H), 4.97 (dd,  $J = 14.3, 3.0$  Hz, 1H), 4.07–7.02 (m, 2H), 3.36 (dd,  $J = 15.9, 14.3$  Hz, 1H), 3.13 (dd,  $J = 15.9, 3.0$  Hz, 1H), 0.96 (t,  $J = 7.1$  Hz, 3H).  $^{13}C$  NMR{ $^1H$ } (101 MHz,  $CDCl_3$ ):  $\delta$  191.0, 165.8, 161.9, 136.1, 134.2, 133.2, 130.7, 129.1, 128.5, 127.99, 127.94, 127.7, 126.75, 126.69, 124.8, 61.3, 46.4, 43.6, 13.6. IR (film): 2925, 2360, 2341, 1729, 1660, 1598, 1551, 1508, 1487, 1443, 1365, 1307, 1210, 1141, 1038, 946, 914, 858, 818, 751, 720, 697, 669, 568, 477  $cm^{-1}$ . HRMS (ESI-TOF)  $m/z$   $[M+H]^+$  calcd. for  $C_{24}H_{21}O_3S^+$  389.1206, found 389.1207.

Ethyl (*E*)-4-oxo-6-phenyl-2-styryl-3,4-dihydro-2H-thiopyran-5-carboxylate (**3am**)



Prepared under *Conditions A* on 0.25 mmol scale. Brown oil, 67 mg, 74% yield,  $R_f = 0.3$  (PE/EA = 5:1, *v/v*).  $^1\text{H}$  NMR (400 MHz,  $\text{CDCl}_3$ ):  $\delta$  7.52–7.47 (m, 2H), 7.44–7.37 (m, 5H), 7.36–7.31 (m, 2H), 7.31–7.27 (m, 1H), 6.70 (d,  $J = 15.7$  Hz, 1H), 6.25 (dd,  $J = 15.7, 8.3$  Hz, 1H), 4.39 (ddd,  $J = 12.1, 8.3, 4.3$  Hz, 1H), 4.03–3.98 (m, 2H), 3.06–2.91 (m, 2H), 0.93 (t,  $J = 7.1$  Hz, 3H).  $^{13}\text{C}$  NMR{ $^1\text{H}$ } (101 MHz,  $\text{CDCl}_3$ ):  $\delta$  190.6, 165.7, 161.3, 136.2, 135.5, 134.4, 130.7, 128.7, 128.51, 128.46, 128.0, 127.9, 126.6, 124.4, 61.2, 44.5, 42.8, 13.6. IR (film): 3058, 3027, 2980, 1728, 1659, 1598, 1550, 1488, 1445, 1407, 1366, 1324, 1212, 1143, 1095, 1072, 1036, 964, 945, 914  $\text{cm}^{-1}$ . HRMS (ESI-TOF)  $m/z$  [ $\text{M}+\text{H}$ ] $^+$  calcd. for  $\text{C}_{22}\text{H}_{21}\text{O}_3\text{S}^+$  365.1206, found 365.1201.

Ethyl 2-((1*R*,5*R*)-6,6-dimethylbicyclo[3.1.1]hept-2-en-2-yl)-4-oxo-6-phenyl-3,4-dihydro-2*H*-thiopyran-5-carboxylate (**3an**)

Prepared under *Conditions A* on 0.25 mmol scale. Yellow oil, 76 mg, 80% yield,  $R_f = 0.5$  (PE/EA = 5:1, *v/v*).  $^1\text{H}$  NMR (400 MHz,  $\text{CDCl}_3$ ):  $\delta$  7.45–7.32 (m, 5H), 5.64–5.62 (m, 1H), 4.23–4.16 (m, 1H), 4.03–3.90 (m, 2H), 2.92 (ddd,  $J = 16.0, 12.5, 7.6$  Hz, 1H), 2.81 (ddd,  $J = 16.0, 3.6, 1.8$  Hz, 1H), 2.47–2.42 (m, 1H), 2.38–2.08 (m, 4H), 1.30 (d,  $J = 3.4$  Hz, 3H), 1.17 (dd,  $J = 8.8, 5.4$  Hz, 1H), 0.89 (td,  $J = 7.1, 1.5$  Hz, 3H), 0.83 (d,  $J = 4.2$  Hz, 3H).  $^{13}\text{C}$  NMR{ $^1\text{H}$ } (101 MHz,  $\text{CDCl}_3$ ):  $\delta$  191.5, 191.3, 165.8, 162.1, 161.9, 143.4, 143.2, 136.6, 136.5, 130.52, 130.50, 128.5, 127.9, 127.8, 122.6, 122.5, 61.1, 47.4, 47.1, 44.0, 43.7, 41.3, 40.9, 40.5, 40.4, 38.2, 38.1, 31.7, 31.6, 31.3, 31.3, 26.0, 21.4, 21.3, 13.6, 13.5. IR (film): 2979, 2932, 1731, 1660, 1611, 1552, 1466, 1444, 1366, 1309, 1212, 1142, 1096, 1038, 945  $\text{cm}^{-1}$ . HRMS (ESI-TOF)  $m/z$  [ $\text{M}+\text{H}$ ] $^+$  calcd. for  $\text{C}_{23}\text{H}_{27}\text{O}_3\text{S}^+$  383.1675, found 383.1671.

Ethyl 2-cyclohexyl-4-oxo-6-phenyl-3,4-dihydro-2*H*-thiopyran-5-carboxylate (**3ao**)

Prepared under *Conditions A* on 0.25 mmol scale. Pale yellow oil, 62 mg, 72% yield,  $R_f = 0.5$  (PE/EA = 5:1, *v/v*).  $^1\text{H}$  NMR (400 MHz,  $\text{CDCl}_3$ ):  $\delta$  7.49–7.32 (m, 5H), 4.00–3.93 (m, 2H), 3.48 (ddd,  $J = 12.9, 6.4, 3.3$  Hz, 1H), 2.86 (dd,  $J = 15.8, 3.3$  Hz, 1H), 2.75 (dd,  $J = 15.8, 12.9$  Hz, 1H), 1.92–1.61 (m, 6H), 1.32–1.07 (m, 5H), 0.90 (t,  $J = 7.1$  Hz, 3H).  $^{13}\text{C}$  NMR{ $^1\text{H}$ } (101 MHz,  $\text{CDCl}_3$ ):  $\delta$  191.9, 165.9, 162.3, 136.8, 130.5, 128.4, 127.8, 127.6, 61.1, 48.2, 40.9, 40.8, 30.1, 29.9, 26.0, 25.92, 25.90, 13.6. IR (film): 2927, 2853, 1730, 1660, 1551, 1486, 1445, 1365, 1322, 1234, 1210, 1095, 1030, 956, 915  $\text{cm}^{-1}$ . HRMS (ESI-TOF)  $m/z$  [ $\text{M}+\text{H}$ ] $^+$  calcd. for  $\text{C}_{20}\text{H}_{25}\text{O}_3\text{S}^+$  345.1519, found 345.1519.

Ethyl 4-oxo-6-phenyl-2-(1-phenylethyl)-3,4-dihydro-2*H*-thiopyran-5-carboxylate (**3ap**)

Prepared under *Conditions A* on 0.25 mmol scale. Yellow oil, 54 mg, 59% yield,  $R_f = 0.15$  (PE/EA = 10:1, *v/v*), *dr* = 1:1.  $^1\text{H}$  NMR (400 MHz,  $\text{CDCl}_3$ ):  $\delta$  7.54–7.49 (m, 1H), 7.49–7.34 (m, 6H), 7.34–7.18 (m, 4H), 4.07–3.93 (m, 2H), 3.85–3.72 (m, 1H), 3.16–3.08 (m, 1H), 3.04 (dd,  $J = 15.8, 3.1$  Hz, 0.5H), 2.78 (dd,  $J = 16, 12.8$  Hz, 0.5H), 2.72 (dd,  $J = 16, 3.6$  Hz, 0.5H), 2.58 (dd,  $J = 16, 12.4$  Hz, 0.5H), 1.52 (d,  $J = 7.0$  Hz, 1.5H), 1.47 (d,  $J = 7.0$  Hz, 1.5H), 0.924 (t,  $J = 7$  Hz, 1.5H), 0.915 (t,  $J = 7$  Hz, 1.5H).  $^{13}\text{C}$  NMR{ $^1\text{H}$ } (101 MHz,  $\text{CDCl}_3$ ):  $\delta$  191.24, 191.21, 165.8, 162.2, 161.4, 141.97, 141.95, 136.61, 136.57, 130.63, 130.55, 128.9, 128.7, 128.5, 128.4, 128.1, 127.95, 127.85, 127.7, 127.5, 127.43, 127.40, 61.16, 61.14, 48.7, 48.6, 43.13, 43.11, 41.6, 41.2, 19.2, 18.5, 13.6. IR (film): 3060, 2970, 2928, 1727, 1658, 1599, 1551, 1491, 1444, 1365, 1326, 1304, 1233, 1211, 1075, 1049, 1028,

946, 914  $\text{cm}^{-1}$ . HRMS (ESI-TOF)  $m/z$   $\text{C}_{22}\text{H}_{23}\text{O}_3\text{S}^+$  calcd. for 367.1362; found 367.1362.

Ethyl 2-methyl-2-(4-methylpent-3-en-1-yl)-4-oxo-6-phenyl-3,4-dihydro-2H-thiopyran-5-carboxylate (**3ar**)

Prepared under *Conditions A* on 0.25 mmol scale. Yellow oil, 74 mg, 83% yield,  $R_f = 0.3$  (PE/EA = 5:1,  $v/v$ ).  $^1\text{H}$  NMR (400 MHz,  $\text{CDCl}_3$ ):  $\delta$  7.46–7.32 (m, 5H), 5.08 (t,  $J = 6.9$  Hz, 1H), 3.96 (q,  $J = 7.1$  Hz, 2H), 2.84 (d,  $J = 15.4$  Hz, 1H), 2.71 (d,  $J = 15.4$  Hz, 1H), 2.17–2.10 (m, 2H), 1.87–1.69 (m, 2H), 1.67 (s, 3H), 1.60 (s, 3H), 1.50 (s, 3H), 0.88 (t,  $J = 7.1$  Hz, 3H).  $^{13}\text{C}$  NMR{ $^1\text{H}$ } (101 MHz,  $\text{CDCl}_3$ ):  $\delta$  191.5, 165.8, 160.6, 136.6, 132.8, 130.4, 128.4, 127.8, 126.8, 122.6, 61.0, 49.7, 49.1, 40.2, 25.5, 24.9, 22.8, 17.6, 13.5. IR (film): 2974, 2930, 1729, 1659, 1551, 1444, 1366, 1326, 1241, 1211, 1075, 1042, 945, 914  $\text{cm}^{-1}$ . HRMS (ESI-TOF)  $m/z$   $[\text{M}+\text{H}]^+$  calcd. for  $\text{C}_{21}\text{H}_{27}\text{O}_3\text{S}^+$  359.1675, found 359.1682.

Ethyl 2-methyl-4-oxo-2,6-diphenyl-3,4-dihydro-2H-thiopyran-5-carboxylate (**3as**)

Prepared under *Conditions A* on 0.25 mmol scale. Yellow oil, 76 mg, 86% yield,  $R_f = 0.3$  (PE/EA = 5:1,  $v/v$ ).  $^1\text{H}$  NMR (400 MHz,  $\text{CDCl}_3$ ):  $\delta$  7.57–7.29 (m, 10H), 3.97 (q,  $J = 7.0$  Hz, 2H), 3.44 (d,  $J = 15.6$  Hz, 1H), 3.03 (d,  $J = 15.6$  Hz, 1H), 1.89 (s, 3H), 0.88 (t,  $J = 7.1$  Hz, 3H).  $^{13}\text{C}$  NMR{ $^1\text{H}$ } (101 MHz,  $\text{CDCl}_3$ ):  $\delta$  191.1, 165.6, 160.5, 142.0, 136.1, 130.5, 128.8, 128.5, 128.4, 128.0, 127.9, 125.7, 61.0, 51.3, 49.8, 27.4, 13.5. IR (film): 3058, 2979, 2927, 1729, 1659, 1598, 1553, 1493, 1444, 1366, 1325, 1241, 1213, 1069, 1028, 1001, 946, 914, 818  $\text{cm}^{-1}$ . HRMS (ESI-TOF)  $m/z$   $[\text{M}+\text{H}]^+$  calcd. for  $\text{C}_{21}\text{H}_{21}\text{O}_3\text{S}^+$  353.1206, found 353.1206.

Ethyl 2-cyclopropyl-2-methyl-4-oxo-6-phenyl-3,4-dihydro-2H-thiopyran-5-carboxylate (**3at**)

Prepared under *Conditions A* on 0.25 mmol scale. Yellow oil, 62 mg, 78% yield,  $R_f = 0.3$  (PE/EA = 5:1,  $v/v$ ).  $^1\text{H}$  NMR (400 MHz,  $\text{CDCl}_3$ ):  $\delta$  7.48–7.31 (m, 5H), 3.97 (q,  $J = 7.1$  Hz, 2H), 2.85 (d,  $J = 15.3$  Hz, 1H), 2.75 (d,  $J = 15.3$  Hz, 1H), 1.34 (s, 3H), 1.21–1.11 (m, 1H), 0.88 (t,  $J = 7.1$  Hz, 3H), 0.60–0.51 (m, 3H), 0.49–0.42 (m, 1H).  $^{13}\text{C}$  NMR{ $^1\text{H}$ } (101 MHz,  $\text{CDCl}_3$ ):  $\delta$  191.5, 165.9, 160.9, 136.5, 130.4, 128.4, 127.8, 127.1, 61.0, 50.0, 49.3, 22.9, 20.0, 13.5, 1.9, 1.5. IR (film): 2979, 1729, 1660, 1598, 1553, 1487, 1444, 1386, 1366, 1325, 1212, 1086, 1051, 1026, 944, 912, 819  $\text{cm}^{-1}$ . HRMS (ESI-TOF)  $m/z$   $[\text{M}+\text{H}]^+$  calcd. for  $\text{C}_{18}\text{H}_{21}\text{O}_3\text{S}^+$  317.1206, found 317.1204.

Ethyl 4-oxo-2-phenyl-1-thiaspiro[5.5]undeca-2,7-diene-3-carboxylate (**3ay**)

Prepared under *Conditions A* on 0.25 mmol scale. Yellow oil, 21 mg, 64% yield,  $R_f = 0.4$  (PE/EA = 5:1,  $v/v$ ).  $^1\text{H}$  NMR (400 MHz,  $\text{CDCl}_3$ ):  $\delta$  7.51–7.32 (m, 5H), 5.98 (d,  $J = 9.2$  Hz, 1H), 5.69 (d,  $J = 9.6$  Hz, 1H), 3.99 (q,  $J = 7.1$  Hz, 2H), 3.01 (d,  $J = 15.3$  Hz, 1H), 2.70 (d,  $J = 15.3$  Hz, 1H), 2.33–2.31 (m, 1H), 2.21–1.98 (m, 2H), 1.97–1.76 (m, 2H), 1.72–1.58 (m, 1H), 0.90 (t,  $J = 7.1$  Hz, 3H).  $^{13}\text{C}$  NMR{ $^1\text{H}$ } (101 MHz,  $\text{CDCl}_3$ ):  $\delta$  191.0, 165.9, 160.9, 136.5, 132.8, 130.5, 128.5, 128.0, 127.9, 127.4, 61.1, 50.2, 49.2, 32.6, 24.9, 19.1, 13.6. IR (film): 2933, 1729, 1660, 1550, 1444, 1365, 1323, 1299, 1248, 1234, 1212, 1095, 1066, 1036, 941  $\text{cm}^{-1}$ . HRMS (ESI-TOF)  $m/z$   $[\text{M}+\text{H}]^+$  calcd. for  $\text{C}_{19}\text{H}_{21}\text{O}_3\text{S}^+$  329.1206, found 329.1201.

Ethyl 3-methyl-4-oxo-6-phenyl-3,4-dihydro-2H-thiopyran-5-carboxylate (**3aac**)

Prepared under *Conditions A* on 0.25 mmol scale. Yellow oil, 19 mg, 28% yield,  $R_f = 0.2$  (PE/EA = 5:1,  $v/v$ ).  $^1\text{H NMR}$  (400 MHz,  $\text{CDCl}_3$ ):  $\delta$  7.53–7.32 (m, 5H), 3.99 (q,  $J = 7.1$  Hz, 2H), 3.18 (d,  $J = 7.9$  Hz, 2H), 2.81 (tq,  $J = 7.9, 6.8$  Hz, 1H), 1.32 (d,  $J = 6.8$  Hz, 3H), 0.93 (t,  $J = 7.2$  Hz, 3H).  $^{13}\text{C NMR}\{^1\text{H}\}$  (101 MHz,  $\text{CDCl}_3$ ):  $\delta$  193.1, 166.1, 160.8, 136.6, 130.6, 128.5, 127.9, 127.7, 61.2, 39.0, 33.5, 14.3, 13.6. IR (film): 3431, 2975, 2931, 1726, 1660, 1551, 1488, 1444, 1365, 1341, 1324, 1288, 1214, 1194, 1093, 1020, 943, 913, 771, 743, 698  $\text{cm}^{-1}$ . HRMS (ESI-TOF)  $m/z$   $[\text{M}+\text{H}]^+$  calcd. for  $\text{C}_{15}\text{H}_{17}\text{O}_3\text{S}^+$  277.0893, found 277.0891.

Ethyl 2,3-dimethyl-4-oxo-6-phenyl-3,4-dihydro-2*H*-thiopyran-5-carboxylate (**3aad**)

Prepared under *Conditions A* on 0.25 mmol scale. Yellow oil, 22 mg, 31% yield,  $R_f = 0.2$  (PE/EA = 5:1,  $v/v$ ),  $dr = 2:1$ .  $^1\text{H NMR}$  (400 MHz,  $\text{CDCl}_3$ ):  $\delta$  7.51–7.31 (m, 5H), 4.01–3.96 (m, 2H), 3.66–3.62 (m, 0.6H), 3.37–3.31 (m, 0.3H), 2.91–2.85 (m, 0.6H), 2.62–2.58 (m, 0.4H), 1.50 (d,  $J = 7.1$  Hz, 1H), 1.41 (d,  $J = 6.8$  Hz, 2H), 1.32 (d,  $J = 6.8$  Hz, 1H), 1.26 (d,  $J = 6.8$  Hz, 2H), 0.92–0.89 (m, 3H).  $^{13}\text{C NMR}\{^1\text{H}\}$  (101 MHz,  $\text{CDCl}_3$ ):  $\delta$  166.1, 136.6, 136.5, 130.5, 128.5, 127.88, 127.86, 127.0, 61.1, 46.2, 44.5, 42.5, 41.4, 18.9, 15.1, 13.6, 12.6, 10.3. IR (film): 2968, 2929, 1719, 1701, 1654, 1648, 1629, 1618, 1577, 1559, 1541, 1534, 1508, 1458, 1443, 1364, 1290, 1211, 1094, 1074, 1020, 945, 912, 773, 760, 735, 696  $\text{cm}^{-1}$ . HRMS (ESI-TOF)  $m/z$   $[\text{M}+\text{H}]^+$  calcd. for  $\text{C}_{16}\text{H}_{19}\text{O}_3\text{S}^+$  291.1049, found 291.1054.

Ethyl 3-methyl-4-oxo-2,6-diphenyl-3,4-dihydro-2*H*-thiopyran-5-carboxylate (**3aae**)

Prepared under *Conditions D* on 0.25 mmol scale. Yellow oil, 89 mg, 50% yield,  $R_f = 0.3$  (PE/EA = 5:1,  $v/v$ ),  $dr = 2:1$ .  $^1\text{H NMR}$  (400 MHz,  $\text{CDCl}_3$ ):  $\delta$  7.53–7.48 (m, 2H), 7.45–7.31 (m, 8H), 4.45 (d,  $J = 13.2$  Hz, 1H), 4.07–3.99 (m, 2H), 3.17 (dq,  $J = 13.2, 6.8$  Hz, 0.7H), 3.0 (dq,  $J = 6.8, 4$  Hz, 0.3H), 1.26 (d,  $J = 4$  Hz, 0.3H), 1.24 (d,  $J = 10$  Hz, 1H), 1.23 (d,  $J = 13.6$  Hz, 0.7H), 1.05 (d,  $J = 6.7$  Hz, 2H), 0.96 (t,  $J = 7.2$ , 2H), 0.94 (t,  $J = 7.2$ , 1H).  $^{13}\text{C NMR}\{^1\text{H}\}$  (101 MHz,  $\text{CDCl}_3$ ):  $\delta$  194.2, 193.1, 166.1, 165.9, 160.7, 159.8, 136.5, 136.4, 136.3, 136.0, 130.61, 130.60, 129.0, 128.9, 128.7, 128.5, 128.4, 128.3, 128.2, 128.1, 127.84, 127.81, 127.4, 126.9, 61.2, 52.3, 50.9, 45.4, 45.2, 13.60, 13.58, 12.1. IR (film): 3060, 2979, 2928, 1728, 1658, 1598, 1556, 1489, 1453, 1366, 1325, 1276, 1212, 1193, 1091, 1022, 943, 916, 844  $\text{cm}^{-1}$ . HRMS (ESI-TOF)  $m/z$   $[\text{M}+\text{H}]^+$  calcd. for  $\text{C}_{21}\text{H}_{21}\text{O}_3\text{S}^+$  353.1206, found 353.1209.

Ethyl 6-(benzo[*d*][1,3]dioxol-5-yl)-2,2-dimethyl-4-oxo-3,4-dihydro-2*H*-thiopyran-5-carboxylate (**3ba**)

Prepared under *Conditions A* on 0.25 mmol scale. Pale yellow oil, 56 mg, 67% yield,  $R_f = 0.3$  (PE/EA = 5:1,  $v/v$ ).  $^1\text{H NMR}$  (400 MHz,  $\text{CDCl}_3$ ):  $\delta$  7.03–6.97 (dd,  $J = 8, 1.2$  Hz, 1H), 6.97–6.91 (d,  $J = 0.8$  Hz, 1H), 6.78 (d,  $J = 8.1$  Hz, 1H), 4.07 (q,  $J = 7.1$  Hz, 2H), 2.72 (s, 2H), 1.49 (s, 6H), 1.03 (t,  $J = 7.1$  Hz, 3H).  $^{13}\text{C NMR}\{^1\text{H}\}$  (101 MHz,  $\text{CDCl}_3$ ):  $\delta$  191.6, 166.3, 160.2, 149.7, 147.8, 130.2, 126.5, 122.6, 108.4, 108.3, 101.6, 61.1, 51.3, 45.2, 27.7, 13.8. IR (film): 2974, 2917, 1726, 1655, 1546, 1503, 1484, 1437, 1367, 1345, 1321, 1299, 1251, 1211, 1101, 1038, 932  $\text{cm}^{-1}$ . HRMS (ESI-TOF)  $m/z$   $[\text{M}+\text{H}]^+$  calcd. for  $\text{C}_{17}\text{H}_{19}\text{O}_5\text{S}^+$  335.0948, found 335.0949.

Ethyl 6-(4-methoxyphenyl)-2,2-dimethyl-4-oxo-3,4-dihydro-2*H*-thiopyran-5-carboxylate (**3ca**)

Prepared under *Conditions B* on 0.10 mmol scale with reaction time extended to 12 h. Pale yellow oil, 22 mg, 69% yield,  $R_f = 0.3$  (PE/EA = 5:1, v/v).  $^1\text{H}$  NMR (400 MHz,  $\text{CDCl}_3$ ):  $\delta$  7.42 (d,  $J = 8.6$  Hz, 2H), 6.87 (d,  $J = 8.7$  Hz, 2H), 4.03 (q,  $J = 7.1$  Hz, 2H), 3.81 (s, 3H), 2.73 (s, 2H), 1.50 (s, 6H), 0.98 (t,  $J = 7.1$  Hz, 3H).  $^{13}\text{C}$  NMR{ $^1\text{H}$ } (101 MHz,  $\text{CDCl}_3$ ):  $\delta$  191.6, 166.4, 161.6, 160.6, 129.6, 128.8, 126.2, 113.9, 61.1, 55.3, 51.3, 45.0, 27.7, 13.8. IR (film): 2964, 2932, 2840, 1727, 1656, 1604, 1574, 1546, 1505, 1461, 1444, 1414, 1388, 1367, 1325, 1294, 1253, 1211, 1176, 1148, 1103, 1040, 949, 933, 836, 813  $\text{cm}^{-1}$ . HRMS (ESI-TOF)  $m/z$   $[\text{M}+\text{H}]^+$  calcd. for  $\text{C}_{17}\text{H}_{21}\text{O}_4\text{S}^+$  321.1155, found 321.1158.

Ethyl 2,2-dimethyl-6-(4-methylphenyl)-4-oxo-3,4-dihydro-2H-thiopyran-5-carboxylate (**3da**)  
Prepared under *Conditions A* on 0.25 mmol scale. Pale yellow oil, 56 mg, 74% yield,  $R_f = 0.3$  (PE/EA = 5:1, v/v).  $^1\text{H}$  NMR (400 MHz,  $\text{CDCl}_3$ ):  $\delta$  7.34 (d,  $J = 7.8$  Hz, 2H), 7.16 (d,  $J = 7.8$  Hz, 2H), 4.00 (q,  $J = 7.1$  Hz, 2H), 2.73 (s, 2H), 2.35 (s, 3H), 1.50 (s, 6H), 0.94 (t,  $J = 7.1$  Hz, 3H).  $^{13}\text{C}$  NMR{ $^1\text{H}$ } (101 MHz,  $\text{CDCl}_3$ ):  $\delta$  191.5, 166.2, 160.9, 140.9, 133.6, 129.1, 127.8, 126.5, 61.0, 51.3, 45.3, 27.7, 21.3, 13.6. IR (film): 2974, 2927, 1729, 1658, 1608, 1550, 1505, 1460, 1408, 1388, 1367, 1325, 1246, 1215, 1184, 1148, 1103, 1041, 1021, 936, 814  $\text{cm}^{-1}$ . HRMS (ESI-TOF)  $m/z$   $[\text{M}+\text{H}]^+$  calcd. for  $\text{C}_{17}\text{H}_{21}\text{O}_3\text{S}^+$  305.1206, found 305.1210.

Ethyl 6-(4-fluorophenyl)-2,2-dimethyl-4-oxo-3,4-dihydro-2H-thiopyran-5-carboxylate (**3ea**)  
Prepared under *Conditions A* on 0.25 mmol scale. Pale yellow oil, 42 mg, 55% yield,  $R_f = 0.3$  (PE/EA = 5:1, v/v).  $^1\text{H}$  NMR (400 MHz,  $\text{CDCl}_3$ ):  $\delta$  7.51–7.40 (m, 2H), 7.09–7.03 (m, 2H), 4.01 (q,  $J = 7.1$  Hz, 2H), 2.75 (s, 2H), 1.52 (s, 6H), 0.96 (t,  $J = 7.1$  Hz, 3H).  $^{13}\text{C}$  NMR{ $^1\text{H}$ } (101 MHz,  $\text{CDCl}_3$ ):  $\delta$  191.4, 165.9, 164.0 (d,  $J_{\text{C-F}} = 252.7$  Hz), 159.4, 132.5 (d,  $J_{\text{C-F}} = 3.2$  Hz), 130.1 (d,  $J_{\text{C-F}} = 8.7$  Hz), 127.1, 115.6 (d,  $J_{\text{C-F}} = 22.0$  Hz), 61.2, 51.2, 45.7, 27.8, 13.7.  $^{19}\text{F}$  NMR{ $^1\text{H}$ } (376 MHz,  $\text{CDCl}_3$ )  $\delta$  -109.3 (s). IR (film): 2974, 2930, 1729, 1661, 1600, 1551, 1503, 1368, 1324, 1299, 1245, 1215, 1160, 1105, 1040, 840  $\text{cm}^{-1}$ . HRMS (ESI-TOF)  $m/z$   $[\text{M}+\text{H}]^+$  calcd. for  $\text{C}_{16}\text{H}_{18}\text{FO}_3\text{S}^+$  309.0955, found 309.0952.

Ethyl 6-(4-chlorophenyl)-2,2-dimethyl-4-oxo-3,4-dihydro-2H-thiopyran-5-carboxylate (**3fa**)  
Prepared under *Conditions B* on 0.10 mmol scale. Pale yellow oil, 24 mg, 74% yield,  $R_f = 0.3$  (PE/EA = 5:1, v/v).  $^1\text{H}$  NMR (400 MHz,  $\text{CDCl}_3$ ):  $\delta$  7.40 (d,  $J = 8.6$  Hz, 2H), 7.35 (d,  $J = 8.5$  Hz, 2H), 4.02 (q,  $J = 7.1$  Hz, 2H), 2.76 (s, 2H), 1.52 (s, 6H), 0.98 (t,  $J = 7.1$  Hz, 3H).  $^{13}\text{C}$  NMR{ $^1\text{H}$ } (101 MHz,  $\text{CDCl}_3$ ):  $\delta$  191.4, 165.8, 159.2, 136.7, 134.9, 129.3, 128.8, 61.3, 51.2, 45.8, 27.8, 13.7, 1.0. IR (film): 2966, 2926, 1729, 1662, 1593, 1549, 1486, 1461, 1398, 1368, 1323, 1298, 1246, 1212, 1091, 1041, 1014, 936, 877, 830  $\text{cm}^{-1}$ . HRMS (ESI-TOF)  $m/z$   $[\text{M}+\text{H}]^+$  calcd. for  $\text{C}_{16}\text{H}_{17}\text{ClO}_3\text{S}^+$  325.0660, found 325.0657.

Ethyl 6-(3,4-dichlorophenyl)-2,2-dimethyl-4-oxo-3,4-dihydro-2H-thiopyran-5-carboxylate (**3ga**)  
Prepared under *Conditions B* on 0.10 mmol scale. Pale yellow oil, 26 mg, 72% yield,  $R_f = 0.3$  (hexane/EA = 5:1, v/v).  $^1\text{H}$  NMR (400 MHz,  $\text{CDCl}_3$ ):  $\delta$  7.58 (d,  $J = 2.1$  Hz, 1H), 7.46 (d,  $J = 8.3$  Hz, 1H), 7.30 (dd,  $J = 8.3, 2.1$  Hz, 1H), 4.07 (q,  $J = 7.1$  Hz, 2H), 2.76 (s, 2H), 1.53 (s, 6H), 1.04 (t,  $J = 7.1$  Hz, 3H).  $^{13}\text{C}$  NMR{ $^1\text{H}$ } (101 MHz,  $\text{CDCl}_3$ ):  $\delta$  191.3, 165.5, 157.4,

136.2, 134.9, 133.0, 130.6, 129.9, 127.5, 127.2, 61.5, 51.1, 46.2, 27.8, 13.8. IR (film): 2975, 2928, 1729, 1665, 1588, 1560, 1543, 1465, 1369, 1322, 1244, 1210, 1133, 1103, 1033, 943, 883, 824  $\text{cm}^{-1}$ . HRMS (ESI-TOF)  $m/z$   $[M+H]^+$  calcd. for  $\text{C}_{16}\text{H}_{17}\text{Cl}_2\text{O}_3\text{S}^+$  359.0270, found 359.0275.

Ethyl 6-(4-iodophenyl)-2,2-dimethyl-4-oxo-3,4-dihydro-2H-thiopyran-5-carboxylate (**3ha**)  
Prepared under *Conditions B* on 0.10 mmol scale. Pale yellow oil, 29 mg, 70% yield,  $R_f = 0.3$  (hexane/EA = 5:1,  $v/v$ ).  $^1\text{H}$  NMR (400 MHz,  $\text{CDCl}_3$ ):  $\delta$  7.72 (d,  $J = 8.4$  Hz, 2H), 7.18 (d,  $J = 8.5$  Hz, 2H), 4.02 (q,  $J = 7.1$  Hz, 2H), 2.75 (s, 2H), 1.52 (s, 6H), 0.98 (t,  $J = 7.2$  Hz, 3H).  $^{13}\text{C}$  NMR $\{^1\text{H}\}$  (101 MHz,  $\text{CDCl}_3$ ):  $\delta$  191.4, 165.7, 159.3, 137.7, 136.0, 129.5, 127.0, 97.0, 61.3, 51.2, 45.9, 27.8, 13.7. IR (film): 2974, 2924, 1727, 1660, 1583, 1560, 1543, 1478, 1460, 1389, 1367, 1323, 1298, 1245, 1212, 1102, 1039, 1005, 936, 821  $\text{cm}^{-1}$ . HRMS (ESI-TOF)  $m/z$   $[M+H]^+$  calcd. for  $\text{C}_{16}\text{H}_{18}\text{IO}_3\text{S}^+$  417.0016, found 417.0010.

Ethyl 2,2-dimethyl-4-oxo-6-(4-(trifluoromethyl)phenyl)-3,4-dihydro-2H-thiopyran-5-carboxylate (**3ia**)  
Prepared under *Conditions B* on 0.10 mmol scale. Pale yellow oil, 28 mg, 78% yield,  $R_f = 0.3$  (PE/EA = 5:1,  $v/v$ ).  $^1\text{H}$  NMR (400 MHz,  $\text{CDCl}_3$ ):  $\delta$  7.64 (d,  $J = 8.2$  Hz, 2H), 7.57 (d,  $J = 8.1$  Hz, 2H), 4.00 (q,  $J = 7.1$  Hz, 2H), 2.78 (s, 2H), 1.55 (s, 6H), 0.92 (t,  $J = 7.1$  Hz, 3H).  $^{13}\text{C}$  NMR $\{^1\text{H}\}$  (101 MHz,  $\text{CDCl}_3$ ):  $\delta$  191.2, 165.4, 158.7, 140.0, 132.2 (q,  $J_{\text{C-F}} = 32.9$  Hz), 128.4, 127.6, 125.4 (q,  $J_{\text{C-F}} = 3.9$  Hz), 123.6 (q,  $J_{\text{C-F}} = 274.0$  Hz), 61.4, 51.2, 46.3, 27.8, 13.6.  $^{19}\text{F}$  NMR $\{^1\text{H}\}$  (376 MHz,  $\text{CDCl}_3$ )  $\delta$  -63.0 (s). IR (film): 2967, 1730, 1664, 1557, 1508, 1461, 1407, 1369, 1322, 1246, 1215, 1169, 1129, 1067, 1040, 1016, 939, 842  $\text{cm}^{-1}$ . HRMS (ESI-TOF)  $m/z$   $[M+H]^+$  calcd. for  $\text{C}_{17}\text{H}_{18}\text{F}_3\text{O}_3\text{S}^+$  259.0923, found 259.0924.

Ethyl 6-(4-cyanophenyl)-2,2-dimethyl-4-oxo-3,4-dihydro-2H-thiopyran-5-carboxylate (**3ja**)  
Prepared under *Conditions B* on 0.10 mmol scale with reaction time extended to 10 h. Pale yellow oil, 22 mg, 70% yield,  $R_f = 0.3$  (PE/EA = 5:1,  $v/v$ ).  $^1\text{H}$  NMR (400 MHz,  $\text{CDCl}_3$ ):  $\delta$  7.68 (d,  $J = 8.0$  Hz, 2H), 7.56 (d,  $J = 8.0$  Hz, 2H), 4.00 (q,  $J = 7.1$  Hz, 2H), 2.78 (s, 2H), 1.54 (s, 6H), 0.95 (t,  $J = 7.2$  Hz, 3H).  $^{13}\text{C}$  NMR $\{^1\text{H}\}$  (101 MHz,  $\text{CDCl}_3$ ):  $\delta$  191.1, 165.2, 157.9, 140.9, 132.2, 128.8, 127.7, 117.9, 114.1, 61.5, 51.1, 46.6, 27.8, 13.7. IR (film): 2966, 2926, 2854, 2230, 1729, 1664, 1565, 1496, 1462, 1389, 1368, 1324, 1273, 1246, 1215, 1148, 1103, 1041, 1019, 841  $\text{cm}^{-1}$ . HRMS (ESI-TOF)  $m/z$   $[M+K]^+$  calcd. for  $\text{C}_{17}\text{H}_{17}\text{KNO}_3\text{S}^+$  354.0561, found 354.0568.

Ethyl 6-(furan-2-yl)-2,2-dimethyl-4-oxo-3,4-dihydro-2H-thiopyran-5-carboxylate (**3ka**)  
Prepared under *Conditions B* on 0.10 mmol scale with reaction time extended to 12 h. Pale yellow oil, 13 mg, 46% yield,  $R_f = 0.3$  (PE/EA = 5:1,  $v/v$ ).  $^1\text{H}$  NMR (400 MHz,  $\text{CDCl}_3$ ):  $\delta$  7.53 (d,  $J = 1.7$  Hz, 1H), 6.95 (d,  $J = 3.6$  Hz, 1H), 6.51 (dd,  $J = 3.6, 1.8$  Hz, 1H), 4.30 (q,  $J = 7.1$  Hz, 2H), 2.74 (s, 2H), 1.50 (s, 6H), 1.27 (t,  $J = 7.1$  Hz, 3H).  $^{13}\text{C}$  NMR $\{^1\text{H}\}$  (101 MHz,  $\text{CDCl}_3$ ):  $\delta$  191.9, 166.7, 148.0, 145.9, 144.0, 122.9, 115.8, 112.6, 61.6, 51.8, 44.8, 27.8, 14.1. IR (film): 2973, 2929, 1731, 1654, 1579, 1528, 1462, 1386, 1367, 1326, 1234, 1210, 1104, 1043, 1026, 948, 883  $\text{cm}^{-1}$ . HRMS (ESI-TOF)  $m/z$   $[M+H]^+$  calcd. for  $\text{C}_{14}\text{H}_{17}\text{O}_4\text{S}^+$  281.0842, found 281.0847.

Ethyl 2,2-dimethyl-4-oxo-6-(thiophen-2-yl)-3,4-dihydro-2*H*-thiopyran-5-carboxylate (**3la**)  
Prepared under *Conditions B* on 0.10 mmol scale. Pale yellow oil, 21 mg, 72% yield,  $R_f = 0.4$  (PE/EA = 5:1, *v/v*).  $^1\text{H NMR}$  (400 MHz,  $\text{CDCl}_3$ ):  $\delta$  7.52 (dd,  $J = 5.1, 1.2$  Hz, 1H), 7.42 (dd,  $J = 3.8, 1.2$  Hz, 1H), 7.07 (dd,  $J = 5.1, 3.8$  Hz, 1H), 4.19 (q,  $J = 7.1$  Hz, 2H), 2.75 (s, 2H), 1.52 (s, 6H), 1.15 (t,  $J = 7.1$  Hz, 3H).  $^{13}\text{C NMR}\{^1\text{H}\}$  (101 MHz,  $\text{CDCl}_3$ ):  $\delta$  191.6, 166.7, 150.8, 137.9, 130.5, 129.8, 128.1, 125.4, 61.6, 51.5, 45.4, 27.6, 13.8. IR (film): 2963, 2927, 1728, 1655, 1546, 1509, 1460, 1415, 1388, 1366, 1320, 1298, 1245, 1213, 1103, 1036, 936, 859  $\text{cm}^{-1}$ . HRMS (ESI-TOF)  $m/z$   $[\text{M}+\text{H}]^+$  calcd. for  $\text{C}_{14}\text{H}_{17}\text{O}_3\text{S}^+$  297.0614, found 297.0615.

Ethyl 2,2-dimethyl-6-(naphthalen-2-yl)-4-oxo-3,4-dihydro-2*H*-thiopyran-5-carboxylate (**3ma**)

Prepared under *Conditions A* on 0.20 mmol scale. Pale yellow oil, 60 mg, 71% yield,  $R_f = 0.3$  (PE/EA = 5:1, *v/v*).  $^1\text{H NMR}$  (400 MHz,  $\text{CDCl}_3$ ):  $\delta$  8.00 (s, 1H), 7.85 (m, 3H), 7.54 (m, 3H), 3.97 (q,  $J = 7.1$  Hz, 2H), 2.81 (s, 3H), 1.57 (s, 6H), 0.82 (t,  $J = 7.1$  Hz, 3H).  $^{13}\text{C NMR}\{^1\text{H}\}$  (101 MHz,  $\text{CDCl}_3$ ):  $\delta$  191.6, 166.1, 160.9, 134.0, 133.9, 132.6, 128.6, 128.3, 128.0, 127.7, 127.5, 127.2, 126.8, 125.0, 61.2, 51.4, 45.7, 27.8, 13.6. IR (film): 3056, 2963, 2928, 1728, 1659, 1597, 1548, 1502, 1462, 1387, 1367, 1349, 1321, 1298, 1240, 1214, 1180, 1147, 1103, 1041, 1018, 861, 817  $\text{cm}^{-1}$ . HRMS (ESI-TOF)  $m/z$   $[\text{M}+\text{K}]^+$  calcd. for  $\text{C}_{20}\text{H}_{20}\text{KO}_3\text{S}^+$  379.0765, found 379.0770.

Ethyl (10*R*,13*S*)-10,13-dimethyl-4'-oxo-6'-phenyl-1,2,3',4',7,8,9,10,11,12,13,14,15,16-tetradecahydrospiro[cyclopenta[*a*]phenanthrene-17,2'-thiopyran]-5'-carboxylate (**13**)

Pale yellow oil, 46 mg, 91% yield,  $R_f = 0.2$  (PE/EA = 20:1, *v/v*).  $^1\text{H NMR}$  (400 MHz,  $\text{CDCl}_3$ ):  $\delta$  7.50–7.34 (m, 5H), 5.96–5.90 (m, 1H), 5.64–5.58 (m, 1H), 5.42–5.36 (m, 1H), 4.04–3.93 (m, 2H), 2.94 (s, 2H), 2.30–2.19 (m, 3H), 2.15–2.12 (m, 1H), 2.10–2.02 (m, 1H), 1.91–1.65 (m, 8H), 1.50–1.30 (m, 3H), 1.22–1.15 (m, 1H), 1.13–1.10 (m, 1H), 0.96 (s, 3H), 0.90 (s, 3H), 0.89 (t,  $J = 7.2$  Hz, 3H).  $^{13}\text{C NMR}\{^1\text{H}\}$  (101 MHz,  $\text{CDCl}_3$ ):  $\delta$  192.1, 165.9, 161.7, 141.5, 136.7, 130.9, 130.5, 128.8, 128.5, 127.9, 125.3, 122.4, 63.1, 61.1, 51.5, 48.0, 47.9, 45.0, 36.4, 35.2, 33.8, 33.6, 32.3, 31.7, 23.9, 23.0, 20.8, 18.8, 14.6, 13.6. IR (film): 3019, 2936, 1724, 1655, 1550, 1444, 1382, 1328, 1216, 1028, 911, 740, 669, 650  $\text{cm}^{-1}$ . HRMS (ESI-TOF)  $m/z$   $[\text{M}+\text{H}]^+$  calcd. for  $\text{C}_{32}\text{H}_{39}\text{O}_3\text{S}^+$  503.2614, found 503.2617.

## 7. Intermediate Probing Experiments

### Dimerization of carbenes

To an oven-dried 10 mL-vial with a stirrer bar were added 1,2,3-thiadiazole **1a** (0.25 mmol, 58.6 mg), catalyst  $[\text{Rh}(\text{COD})\text{Cl}]_2$  (12.3 mg, 10 mol%), ligand DPPF (33.3 mg, 24 mol%), and pre-dried solvent PhCl (1 mL). The vial was sealed with a nitrogen gas balloon. Then the reaction mixture was kept stirring at 130 °C in an oil-bath for 6 h. After the ensuing mixture was cooled to room temperature, the solvent was removed by rotary evaporation. The resulting residue was purified by silica gel column chromatography (PE/EA = 5:1~20:1, *v/v*) to give 1,2,3-thiadiazole **1a** (14 mg, 21% recovery), dimer of the carbene **4** (22 mg, 46% yield) and phosphine sulfide **5** (11 mg, 7% yield).

Diethyl 2,3-dibenzoylbut-2-enedioate (**4**)<sup>8</sup> [(*E*)-isomer: CAS No. 77249-46-8] [(*Z*)-isomer: CAS No. 60903-90-4]

Pale yellow oil, 22 mg, 46% yield,  $R_f = 0.55$  (PE:EA = 5:1, *v/v*). <sup>1</sup>H NMR (400 MHz, CDCl<sub>3</sub>)  $\delta$  7.54–7.19 (m, 10H), 4.18 (q,  $J = 7.2$  Hz, 2H; q,  $J = 7.2$  Hz, 0.67H;), 3.94 (q,  $J = 7.1$  Hz, 1.33H), 1.17 (t,  $J = 7.2$  Hz, 3H; t,  $J = 7.2$  Hz, 1H), 0.83 (t,  $J = 7.1$  Hz, 2H). <sup>13</sup>C NMR{<sup>1</sup>H} (101 MHz, CDCl<sub>3</sub>)  $\delta$  164.7, 161.4, 148.6, 147.8, 135.1, 134.8, 132.5, 129.8, 129.2, 129.0, 128.8, 128.6, 127.9, 127.5, 127.4, 127.3, 61.4, 61.13, 61.09, 13.92, 13.90, 13.4. HRMS (ESI-TOF)  $m/z$  [M+Na]<sup>+</sup> calcd. for C<sub>22</sub>H<sub>20</sub>NaO<sub>6</sub><sup>+</sup> 403.1152, found 403.1149.

Phosphine sulfide **5**<sup>9</sup> [CAS No. 170656-69-6]

Yellow solid, m.p. 240–250 °C, 11 mg, 7% yield,  $R_f = 0.4$  (PE:EA = 5:1, *v/v*). <sup>1</sup>H NMR (400 MHz, CDCl<sub>3</sub>)  $\delta$  7.64–7.58 (m, 8H),  $\delta$  7.46–7.43 (m, 4H), 7.40–7.36 (m, 8H), 4.64 (dd,  $J = 3.6, 1.6$  Hz, 4H), 4.29 (dd,  $J = 4.0, 2.0$  Hz, 4H). <sup>13</sup>C NMR{<sup>1</sup>H} (101 MHz, CDCl<sub>3</sub>)  $\delta$  134.5, 133.7, 131.5, 131.4, 131.32, 131.29, 128.3, 128.2, 75.04, 74.94, 74.1, 74.0. <sup>31</sup>P NMR{<sup>1</sup>H} (162 MHz, CDCl<sub>3</sub>)  $\delta$  40.73. HRMS (ESI-TOF)  $m/z$  [M+Na]<sup>+</sup> calcd. for C<sub>34</sub>H<sub>28</sub>FeNaP<sub>2</sub>S<sub>2</sub><sup>+</sup> 641.0349, found 641.0353.

### Decarbonylation of (*E*)-3-(naphthalene-2-yl)propenal (**2l**)

To an oven-dried 10 mL-vial with a stirrer bar were added (*E*)-3-(naphthalene-2-yl)propenal (**2l**) (0.2 mmol, 36.4 mg), catalyst [Rh(COD)Cl]<sub>2</sub> (5 mg, 5 mol%), ligand DPPF (13 mg, 12 mol%), and pre-dried solvent PhCl (1 mL). The vial was sealed with a nitrogen gas balloon. The reaction mixture was kept stirring at 130 °C in an oil-bath for 6 h. After the ensuing mixture was cooled to room temperature, the solvent was removed by rotary evaporation. The resulting residue was purified by silica gel column chromatography (PE/EA = 20:1, *v/v*) to give (*E*)-3-(naphthalene-2-yl)propenal (**2l**) (2 mg, 5% recovery) and 2-vinylnaphthalene (**6**) (28 mg, 91% yield).

2-Vinylnaphthalene (**6**)<sup>10</sup> [CAS No. 827-54-3]

White solid, m.p. 66–67 °C (Lit.<sup>10</sup> 65.5–66 °C),  $R_f = 0.8$  (PE:EA = 10:1, *v/v*). <sup>1</sup>H NMR (400 MHz, CDCl<sub>3</sub>)  $\delta$  7.85–7.74 (m, 4H), 7.64 (dd,  $J = 8.5, 1.8$  Hz, 1H), 7.50–7.42 (m, 2H), 6.89 (dd,  $J = 17.6, 10.9$  Hz, 1H), 5.88 (d,  $J = 17.6$  Hz, 1H), 5.34 (d,  $J = 10.9$  Hz, 1H). <sup>13</sup>C NMR{<sup>1</sup>H} (101 MHz, CDCl<sub>3</sub>)  $\delta$  136.9, 135.0, 133.1, 128.1, 128.0, 127.7, 126.3, 126.2, 125.9, 123.2, 114.2, 100.0.

## 8. Isotope Tracing Experiments

To an oven-dried 10 mL-vial with a stirrer bar were added 1,2,3-thiadiazole **1a** (0.2 mmol, 46 mg), catalyst [Rh(COD)Cl]<sub>2</sub> (5 mg, 5 mol%), ligand DPPF (13.3 mg, 12 mol%), and pre-dried solvent PhCl (1 mL). The vial was sealed with a nitrogen gas balloon, then alk-2-enal (**2g-d**) (0.4 mmol, 53.2 mg) was added. The reaction mixture was kept stirring at 130 °C in an oil-bath for 6 h. After the ensuing mixture was cooled to room temperature, the solvent was removed by rotary evaporation. The resulting residue was purified by silica gel column chromatography (PE/EA 5:1~20:1, *v/v*) to give 2,3-dihydro-4*H*-thiopyran-4-one **3ag-dh** as brown oil in 85% yield.

Ethyl 4-oxo-2,6-diphenyl-3,4-dihydro-2*H*-thiopyran-5-carboxylate-3-*d* (**3ag-d/h**)  
 Brown oil, 57 mg, 85% yield,  $R_f = 0.3$  (PE:EA = 10:1, *v/v*).  $^1\text{H NMR}$  (400 MHz,  $\text{CDCl}_3$ )  $\delta$  7.55–7.49 (m, 2H), 7.47–7.32 (m, 8H), 4.83–4.79 (m, 1H), 4.08–3.96 (m, 2H), 3.23 (dd,  $J = 15.2, 15.2$  Hz, 0.8H), 3.04 (dd,  $J = 16.0, 3.0$  Hz, 0.8H), 0.94 (t,  $J = 7.2$  Hz, 3H).  $^{13}\text{C NMR}\{^1\text{H}\}$  (101 MHz,  $\text{CDCl}_3$ )  $\delta$  191.06, 191.03, 165.8, 162.0, 136.9, 136.1, 130.7, 129.1, 128.8, 128.5, 127.9, 127.4, 61.2, 46.22, 46.15, 43.6, 13.6. HRMS (ESI-TOF)  $m/z$   $[\text{M}+\text{H}]^+$  calcd. for  $\text{C}_{20}\text{H}_{18}\text{DO}_3\text{S}^+$  340.1112, found 340.1116.

## 9. KIE Studies

To two oven-dried 10 mL-vials with stirrer bars each were added 1,2,3-thiadiazole **1a** (0.25 mmol, 58.6 mg), catalyst  $[\text{Rh}(\text{COD})\text{Cl}]_2$  (6.2 mg, 5 mol%), ligand DPPF (16.6 mg, 12 mol%), and pre-dried solvent PhCl (1 mL). The vials were sealed with nitrogen gas balloons, then alk-2-enal **2g-d** (0.5 mmol, 67 mg) and **2g** (0.5 mmol, 66 mg) were added, respectively. When the reaction mixtures were stirred and heated at 130 °C in an oil-bath for 5 min, a small portion of the reaction mixtures was taken out from reactions 1 and 2 for  $^1\text{HNMR}$  analysis. Samples of 10 min, 15 min, 20 min, 30 min, 40 min, 50 min and 60 min were made by the same procedure.

**Table S3.**  $^1\text{HNMR}$  analysis for reactions 1 and 2

| Entry | Time (min) | Yield of <b>3ag</b> (%)<br>(Reaction 2) | Yield of <b>3ag-d</b> (%)<br>(Reaction 1) |
|-------|------------|-----------------------------------------|-------------------------------------------|
| 1     | 5 min      | 12                                      | 30                                        |
| 2     | 10 min     | 17                                      | 39                                        |
| 3     | 15 min     | 20                                      | 48                                        |
| 4     | 20 min     | 28                                      | 52                                        |
| 5     | 30 min     | 30                                      | 59                                        |
| 6     | 40 min     | 38                                      | 60                                        |
| 7     | 50 min     | 44                                      | 64                                        |
| 8     | 60 min     | 49                                      | 65                                        |

## 10. Gram-scale reaction

Ethyl 5-phenyl-1,2,3-thiadiazole-4-carboxylate (**1a**) (5 mmol, 1.17g),  $[\text{Rh}(\text{COD})]_2\text{Cl}_2$  (123 mg, 0.25 mmol), and DPPF (333 mg, 0.6 mmol) were added into a three-neck round bottom flask. The flask was equipped with a condenser tube and then sealed with  $\text{N}_2$  balloon. PhCl (20 mL) and cinnamaldehyde (**2g**) (10 mmol, 1.32 g) were added. The reaction mixture was then heated in an oil bath at 130 °C for 6 h. After removal of solvent under reduced pressure the residue was purified by silica gel column chromatography (PE/EA = 10:1, *v/v*). The product ethyl 4-oxo-2,6-diphenyl-3,4-dihydro-2*H*-thiopyran-5-carboxylate (**3ag**) was obtained in 1.27 g, 75 % yield.



## 11. Trials on asymmetric catalysis

(i) To an oven-dried 10 mL-vial with a stirring bar were added 1,2,3-thiadiazole **1a** (0.1 mmol, 23.4 mg), catalyst [Rh(COD)Cl]<sub>2</sub> (2.5 mg, 5 mol%), ligand (*R*)-BINAP (7.5 mg, 12 mol%) and pre-dried solvent PhCl (0.5 mL). The vial was sealed with a nitrogen gas balloon, then alkenyl aldehyde **2h** (0.2 mmol, 30 mg) was added via a syringe. The reaction mixture was kept stirring at 130 °C in an oil-bath for 6 h. After the reaction mixture was cooled to room temperature, the solvent was removed by rotary evaporation. The resulting residue was purified by silica gel column chromatography (PE/EA = 5:1, v/v) to give desired product **3ah** in 17% yield (6 mg). HPLC analysis: Daicel Chiralpak AS-H (*i*-PrOH/hexane = 15/85, v/v, 1.0 mL/min, 210 nm) major t<sub>R</sub> = 12.009 min and 13.647 min.

(ii) The same procedure as above but using (*S*)-BINAP (7.5 mg, 12 mol%) as ligand gave desired product **3ah** in 6% yield (2 mg). HPLC analysis: Daicel Chiralpak AS-H (*i*-PrOH/hexane = 15/85, v/v, 1.0 mL/min, 210 nm) major t<sub>R</sub> = 12.042 min and 13.661 min.

HPLC data of the product obtained using **DPPF** ligand.

Daicel Chiralpak AS-H (*i*-PrOH/hexane = 15/85, v/v, 1.0 mL/min, 210 nm)

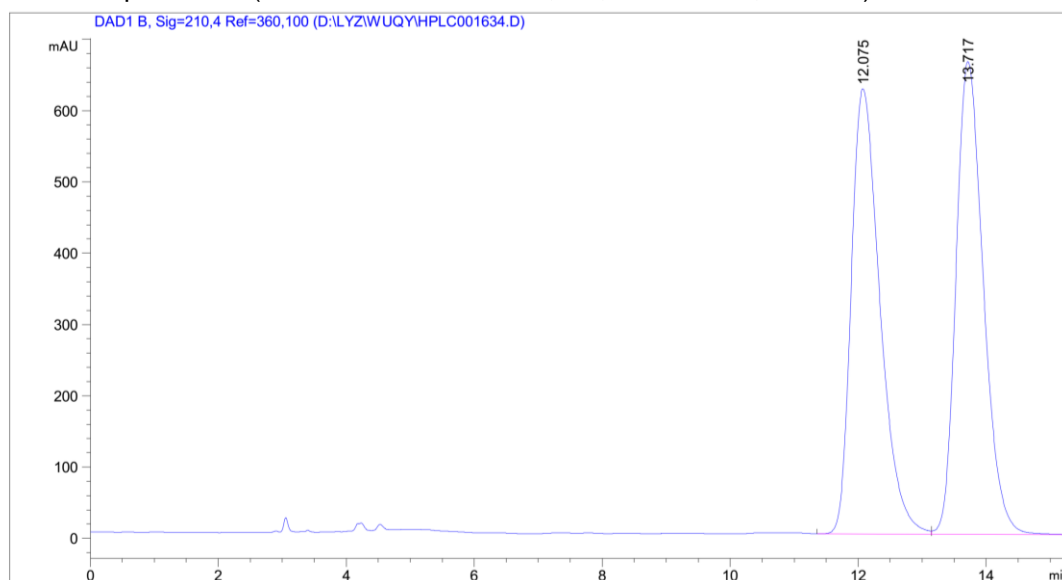

| Peak # | Ret. Time [min] | Type | Width [min] | Area [mAU*s] | Height [mAU] | Area %  |
|--------|-----------------|------|-------------|--------------|--------------|---------|
| 1      | 12.075          | BV   | 0.4789      | 1.94317e4    | 624.64917    | 49.7630 |
| 2      | 13.717          | VBA  | 0.4592      | 1.96168e4    | 662.95557    | 50.2370 |

HPLC data of the product obtained using (**R**)-BINAP ligand.

Daicel Chiralpak AS-H (*i*-PrOH/hexane = 15/85, *v/v*, 1.0 mL/min, 210 nm)

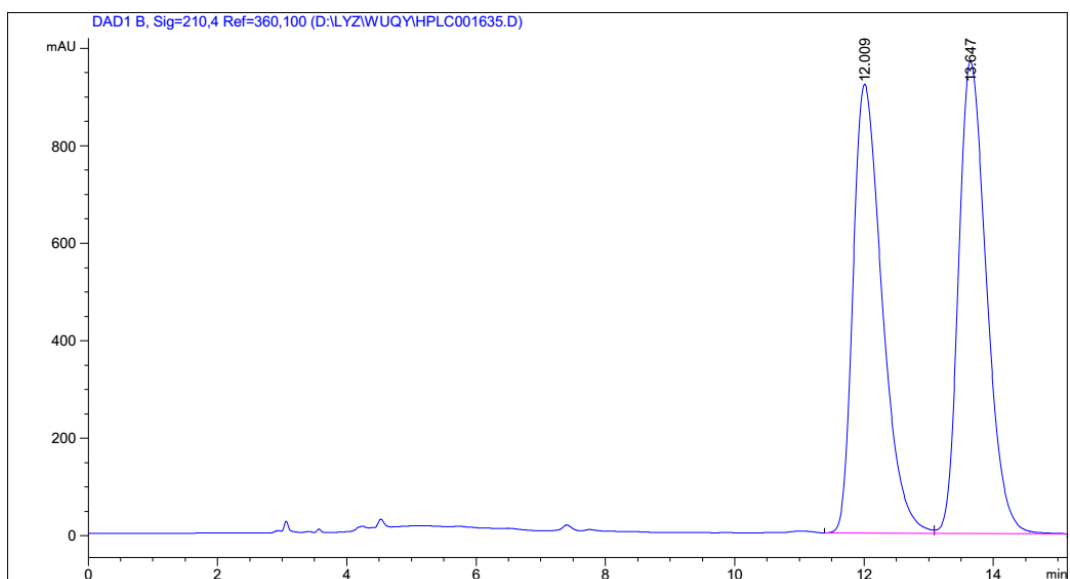

| Peak # | Ret. Time [min] | Type | Width [min] | Area [mAU*s] | Height [mAU] | Area %  |
|--------|-----------------|------|-------------|--------------|--------------|---------|
| 1      | 12.009          | BV   | 0.4814      | 2.86749e4    | 920.63379    | 49.7789 |
| 2      | 13.647          | VBA  | 0.4647      | 2.89297e4    | 967.89911    | 50.2211 |

HPLC data of the product obtained using **(S)-BINAP** ligand.  
 Daicel Chiralpak AS-H (*i*-PrOH/hexane = 15/85, *v/v*, 1.0 mL/min, 210 nm)

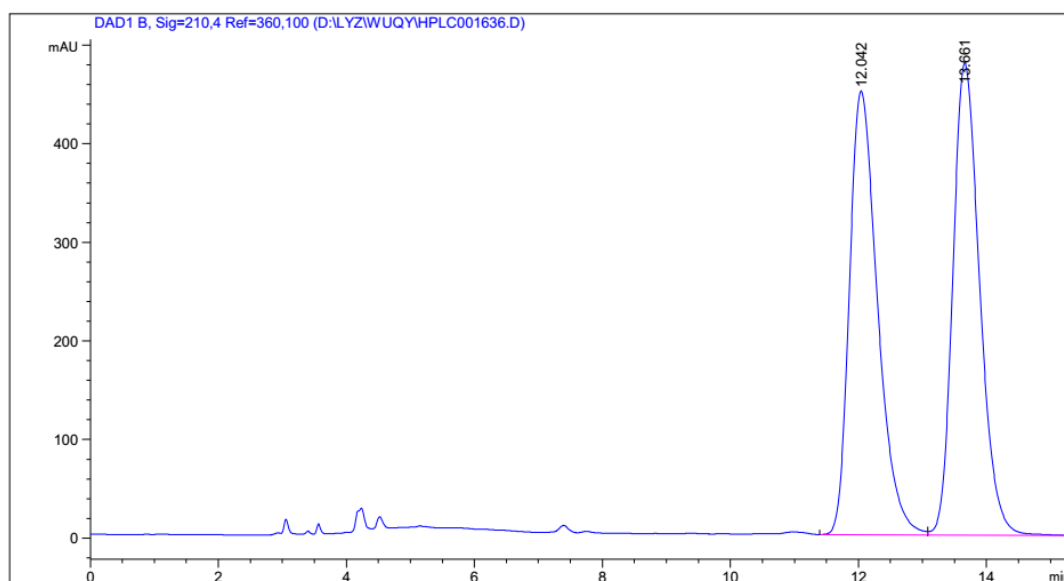

| Peak # | Ret. Time [min] | Type | Width [min] | Area [mAU*s] | Height [mAU] | Area %  |
|--------|-----------------|------|-------------|--------------|--------------|---------|
| 1      | 12.042          | BV   | 0.4696      | 1.37233e4    | 450.22104    | 49.6819 |
| 2      | 13.661          | VBA  | 0.4485      | 1.38990e4    | 478.99881    | 50.3181 |

### 13. Reference

- (1) B. Zhou, Q. Wu, Z. Dong, J. Xu and Z. Yang, Rhodium-Catalyzed 1,1-Hydroacylation of Thioacyl Carbenes with Alkynyl Aldehydes and Subsequent Cyclization. *Org. Lett.*, 2019, **21**, 3594.
- (2) D. Kurandina and V. Gevorgyan, Rhodium Thiavinyl Carbenes from 1,2,3-Thiadiazoles Enable Modular Synthesis of Multisubstituted Thiophenes. *Org. Lett.*, 2016, **18**, 1804.
- (3) (a) J.-Y. Son, J. Kim, S. H. Han, S. H. Kim and P. H. Lee, Regioselective Synthesis of Dihydrothiophenes and Thiophenes via the Rhodium-Catalyzed Transannulation of 1,2,3-Thiadiazoles with Alkenes. *Org. Lett.*, 2016, **18**, 5408; (b) B. Seo, Y. G. Kim and P. H. Lee, Synthesis of Isothiazole via the Rhodium-Catalyzed Transannulation of 1,2,3-Thiadiazoles with Nitriles. *Org. Lett.*, 2016, **18**, 5050; (c) B. Seo, H. Kim, Y. G. Kim, Y. Baek, K. Um and P. H. Lee, Synthesis of Bicyclic Isothiazoles through an Intramolecular Rhodium-Catalyzed Transannulation of Cyanothiadiazoles. *J. Org. Chem.*, 2017, **82**, 10574; (d) J. E. Kim, J. Lee, H. Yun, Y. Baek and P. H. Lee, Rhodium-Catalyzed Intramolecular Transannulation Reaction of Alkynyl Thiadiazole Enabled 5,*n*-Fused Thiophenes. *J. Org. Chem.*, 2017, **82**, 1437.
- (4) (a) R. M. de Figueiredo, R. Berner, J. Julis, T. Liu, D. Türp and M. Christmann, Bidirectional, Organocatalytic Synthesis of Lepidopteran Sex Pheromones. *J. Org. Chem.*, 2007, **72**, 640; (b) A. K. Willard, F. C. Novello, W. F. Hoffman and E. J. Jr. Cragoe, Substituted pyranone inhibitors of cholesterol synthesis, 1983, US 4375475; (c) A. Nordqvist, C. Björkelid, M. Andaloussi, A. M. Jansson, S. L. Mowbray, A. Karlén and M. Larhed, Synthesis of Functionalized Cinnamaldehyde Derivatives by an Oxidative Heck Reaction and Their Use as Starting Materials for Preparation of Mycobacterium tuberculosis 1-Deoxy-d-xylulose-5-phosphate Reductoisomerase Inhibitors. *J. Org. Chem.*, 2011, **76**, 8986; (d) M. Shi, G.-Q. Tian and J. Li, Palladium(II) and Palladium(0)-Cocatalyzed Ring Opening and Oxidation Reactions of 2-(Arylmethylene)cyclopropylcarbinols. *Tetrahedron*, 2009, **65**, 3404; (e) L. K. Ransborg, L. Lykke, N. Hammer, L. Næsborg and K. A. Jørgensen, An Organocatalytic One-Pot Cascade Incorporating the Achmatowicz Reaction Affording 3-Pyrone Derivatives. *Chem. Commun.*, 2014, **50**, 7604; (f) J. Stiller, E. Marqués-López, R. P. Herrera, R. Fröhlich, C. Strohmam and M. Christmann, Enantioselective  $\alpha$ - and  $\gamma$ -Alkylation of  $\alpha,\beta$ -Unsaturated Aldehydes Using Dienamine Activation. *Org. Lett.*, 2011, **13**, 70; (g) M. G. Lauer, W. H. Henderson, A. Awad and J. P. Stambuli, Palladium-Catalyzed Reactions of Enol Ethers: Access to Enals, Furans, and Dihydrofurans. *Org. Lett.*, 2012, **14**, 6000.
- (5) (a) H. Jiang, K. S. Halskov, T. K. Johansen and K. A. Jørgensen, Deracemization of Axially Chiral  $\alpha,\beta$ -Unsaturated Aldehydes through an Amino-Catalyzed Symmetry-Making–Symmetry-Breaking Cascade. *Chem. - Eur. J.*, 2011, **17**, 3842; (b) D. Castagnolo, L. Botta and M. Botta, Alkyne-Enol Ether Cross-Metathesis in the Presence of CuSO<sub>4</sub>: Direct Formation of 3-Substituted Crotonaldehydes in Aqueous Medium. *J. Org. Chem.*, 2009, **74**, 3172; (c) S. Julia, M. Julia, S.-Y. Tchen and P. Graffin, Vinylogous homoallylic rearrangement of  $\alpha,\beta$ -ethylene- $\gamma$ -cyclopropane alcohols. *Bull. Soc. Chim. Fr.*, 1964, 3207; (d) G. Wickham, G. J. Wells, L. Waykole and L. A. Paquette, Strain-activated 1,3-butadienes. Synthesis and dienic reactivity of dicyclobutylideneethane. *J. Org. Chem.*,

- 1985, **50**, 3485; (e) K. S. Halskov, T. K. Johansen, R. L. Davis, M. Steurer, F. Jensen and K. A. Jørgensen, Cross-trienamines in Asymmetric Organocatalysis. *J. Am. Chem. Soc.*, 2012, **134**, 12943.
- (6) D. Michel, P. Y. Louis, B. J. Jacques and D. Pierre, Preparation d'aldéhydes-éthyléniques deutériés sur le groupement carbonyle. *J. Labelled Compd. Radiopharm.*, 1976, **12**, 389.
- (7) H. Lindlar and R. Dubuis, Palladium Catalyst for Partial Reduction of Acetylenes. *Org. Synth.*, 1966, **46**, 89.
- (8) W. Han, Y. Yang, Y. Zhu and Y. Shi, A Facile Copper(I)-Catalyzed Homo-Coupling of Indanone Derivatives Using Diaziridinone under Mild Conditions. *Org. Biomol. Chem.*, 2019, **17**, 6998.
- (9) Z.-G. Fang, T. S. Andy, Y.-S. Wen, L.-K. Liu and T. C. W. Mak, Molecular Structures of 1,1'-Bis(diphenylphosphino)ferrocene Oxide and Sulphide and Their Thermal Properties. *Polyhedron*, 1995, **14**, 2403.
- (10) T. M. Gøgsig, L. S. Søbjerg, A. T. Lindhardt, K. L. Jensen and T. Skrydstrup, Direct Vinylation and Difluorovinylation of Arylboronic Acids Using Vinyl- and 2,2-Difluorovinyl Tosylates via the Suzuki–Miyaura Cross Coupling. *J. Org. Chem.*, 2008, **73**, 3404.

### 13. Copies of Spectra of Materials, Intermediates, and Products

Ethyl 5-phenyl-1,2,3-thiadiazole-4-carboxylate (**1a**)

<sup>1</sup>H MNR (400 MHz, CDCl<sub>3</sub>)

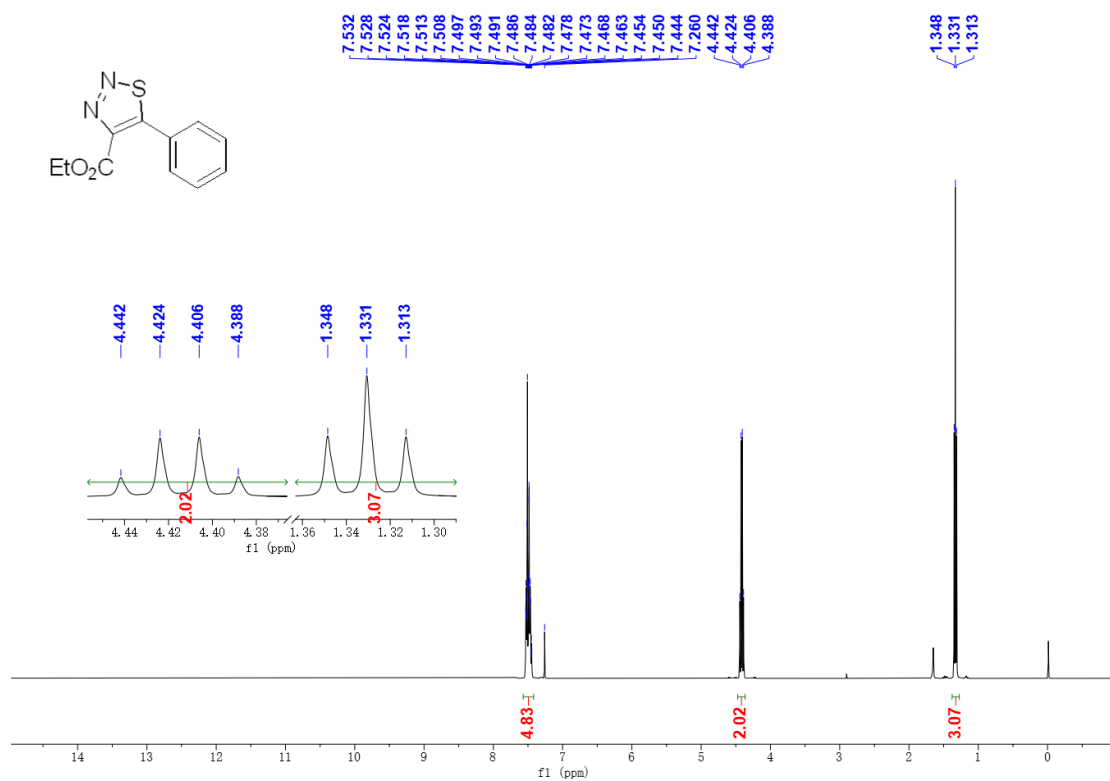

<sup>13</sup>C NMR{<sup>1</sup>H} (101 MHz, CDCl<sub>3</sub>)

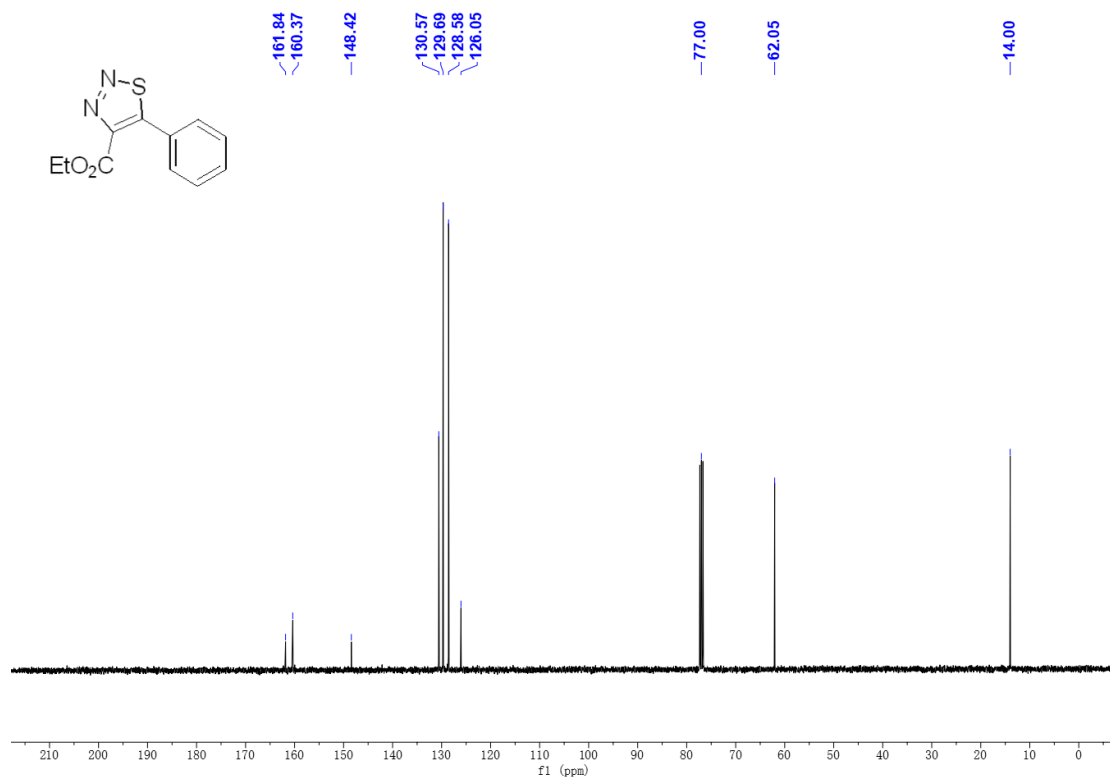

Ethyl 5-(benzo[d][1,3]dioxol-5-yl)-1,2,3-thiadiazole-4-carboxylate (**1b**)

<sup>1</sup>H NMR (400 MHz, CDCl<sub>3</sub>)

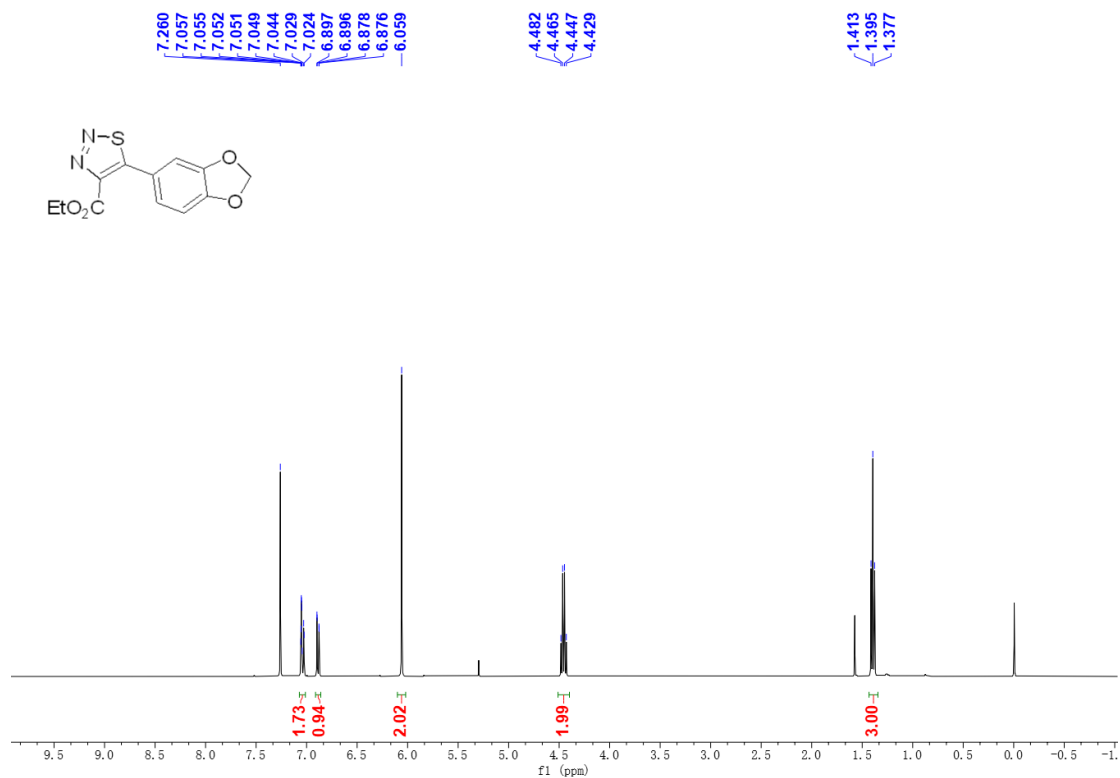

<sup>13</sup>C NMR{<sup>1</sup>H} (101 MHz, CDCl<sub>3</sub>)

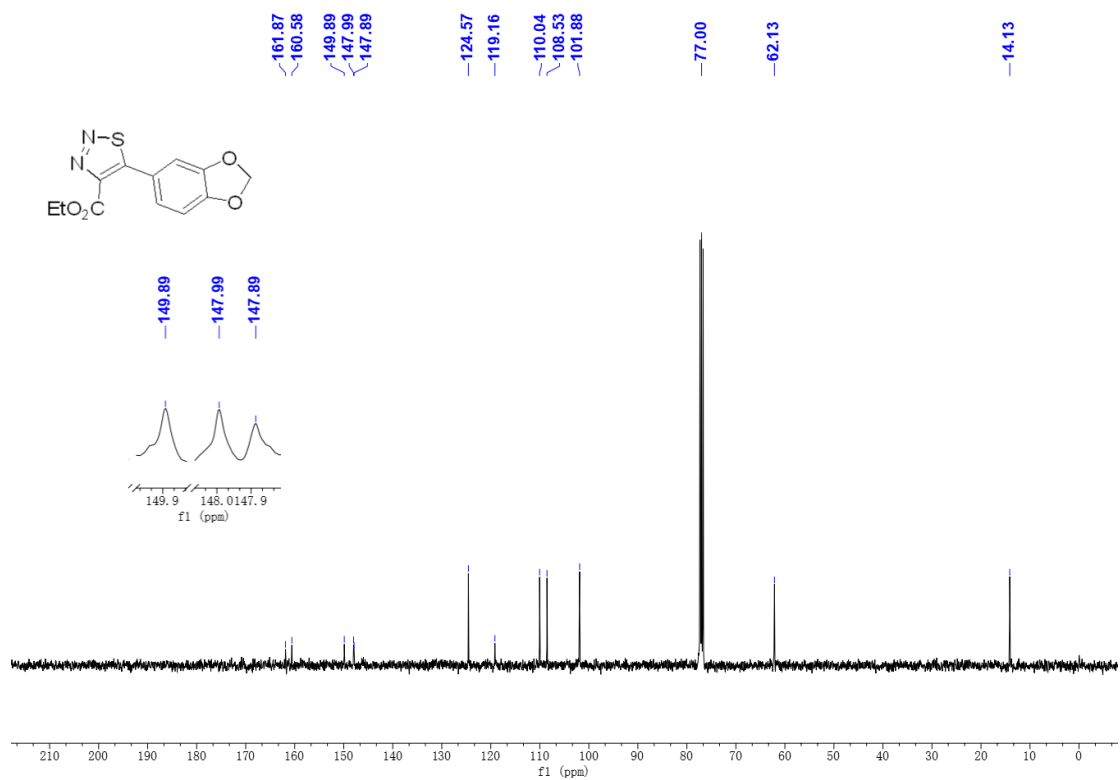

Ethyl 5-(4-methoxyphenyl)-1,2,3-thiadiazole-4-carboxylate (**1c**)

$^1\text{H}$  NMR (400 MHz,  $\text{CDCl}_3$ )

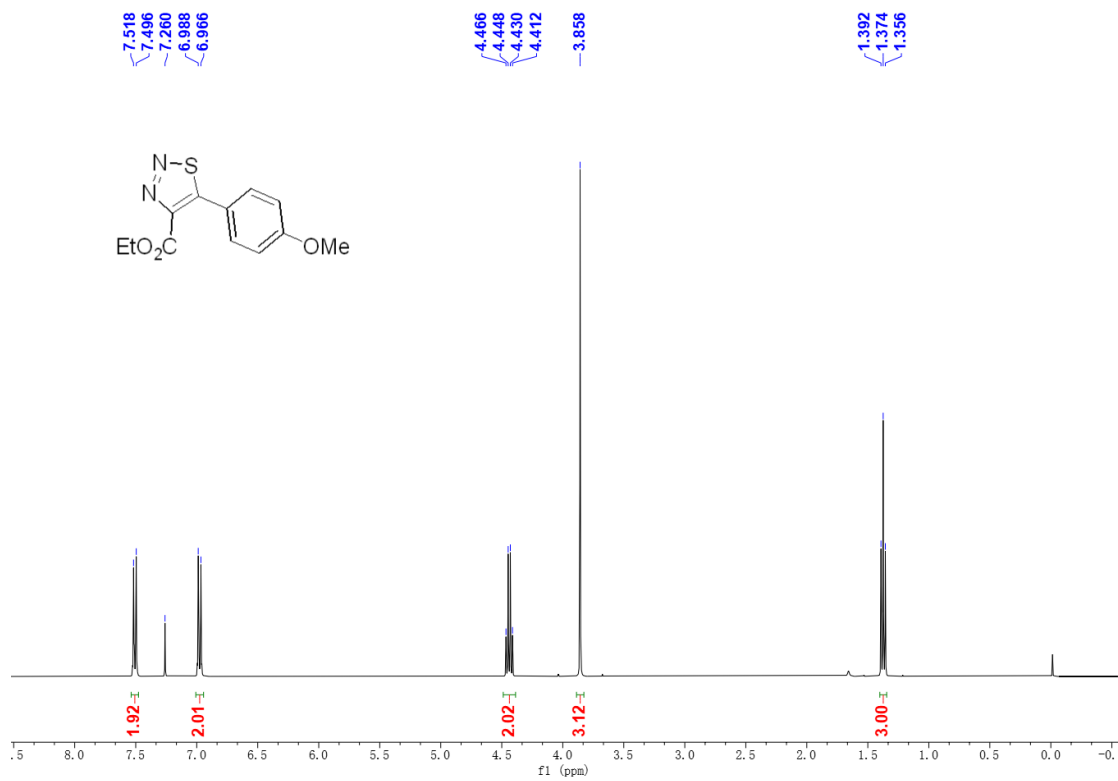

$^{13}\text{C}$  NMR ( $^1\text{H}$ ) (101 MHz,  $\text{CDCl}_3$ )

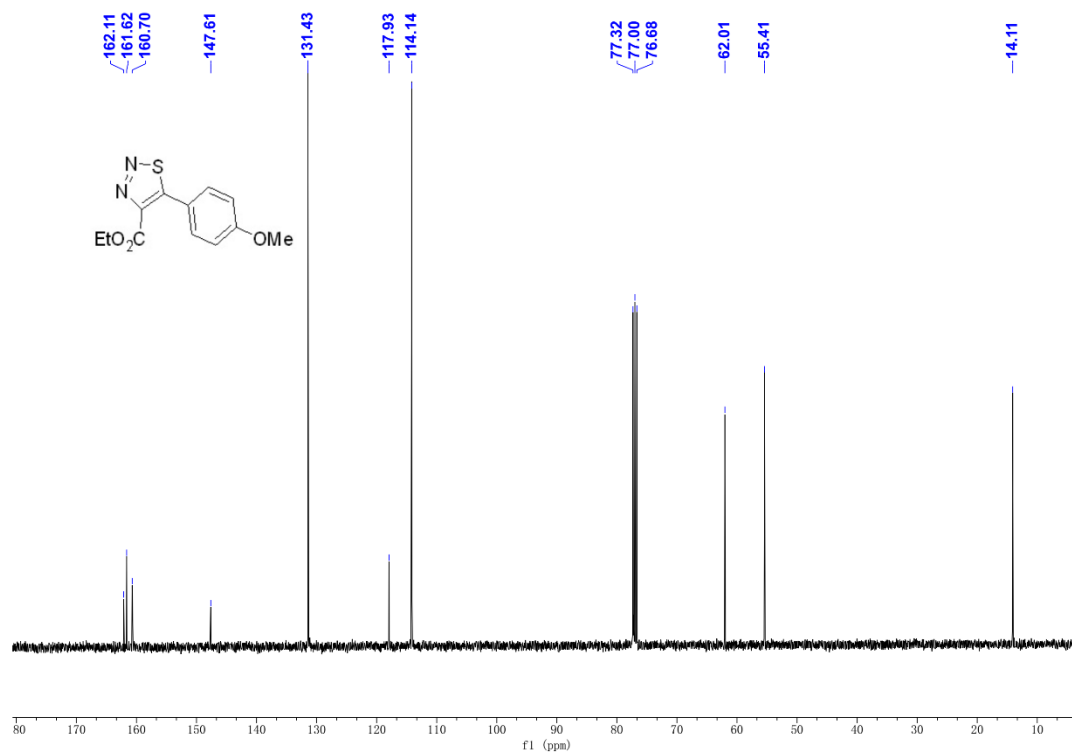



Ethyl 5-(4-methylphenyl)-1,2,3-thiadiazole-4-carboxylate (**1d**)

<sup>1</sup>H NMR (400 MHz, CDCl<sub>3</sub>)

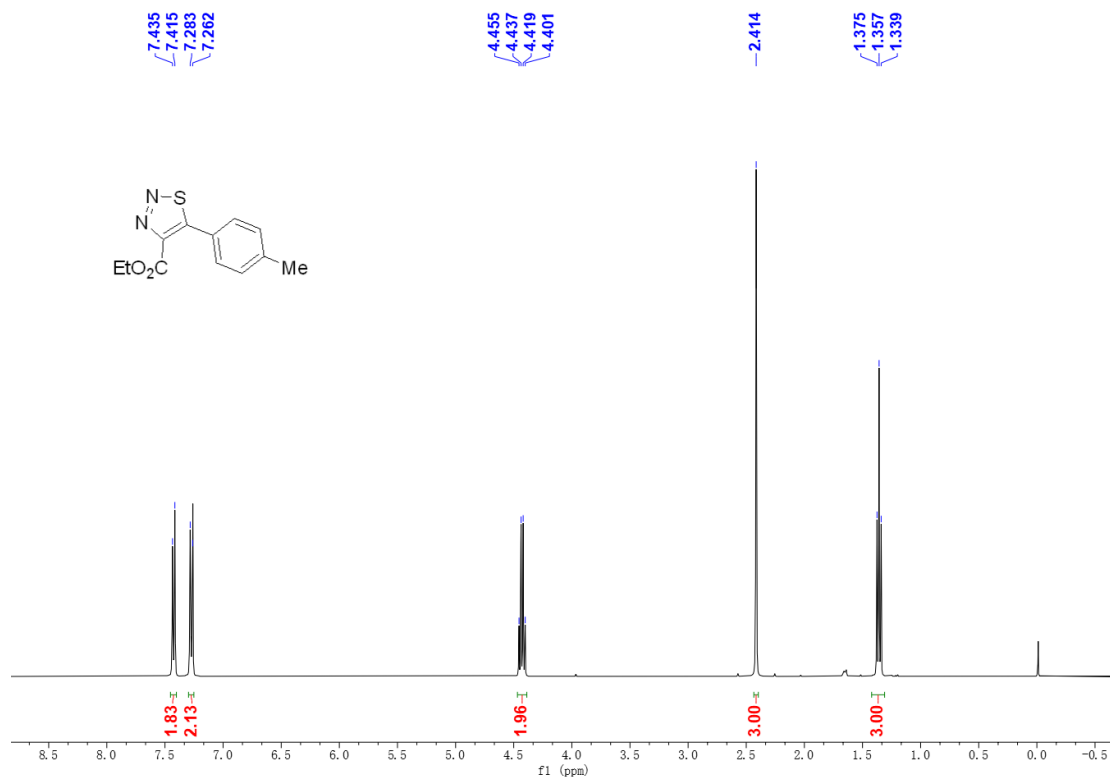

<sup>13</sup>C NMR{<sup>1</sup>H} (101 MHz, CDCl<sub>3</sub>)

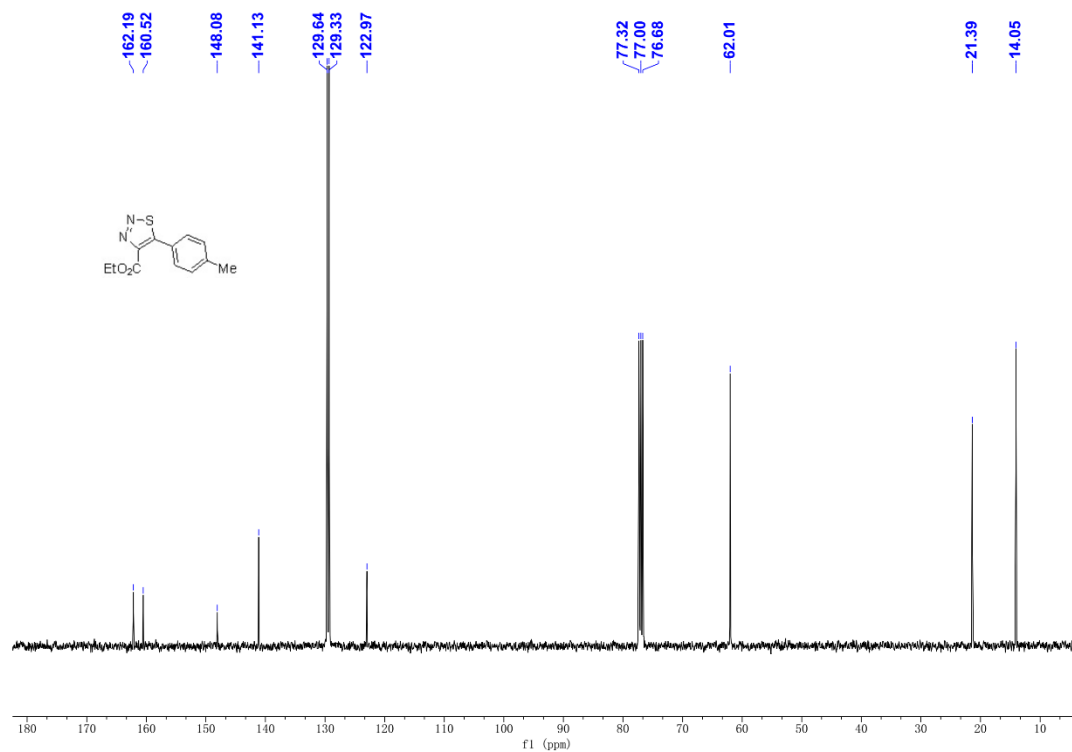

Ethyl 5-(4-fluorophenyl)-1,2,3-thiadiazole-4-carboxylate (**1e**)

$^1\text{H}$  NMR (400 MHz,  $\text{CDCl}_3$ )

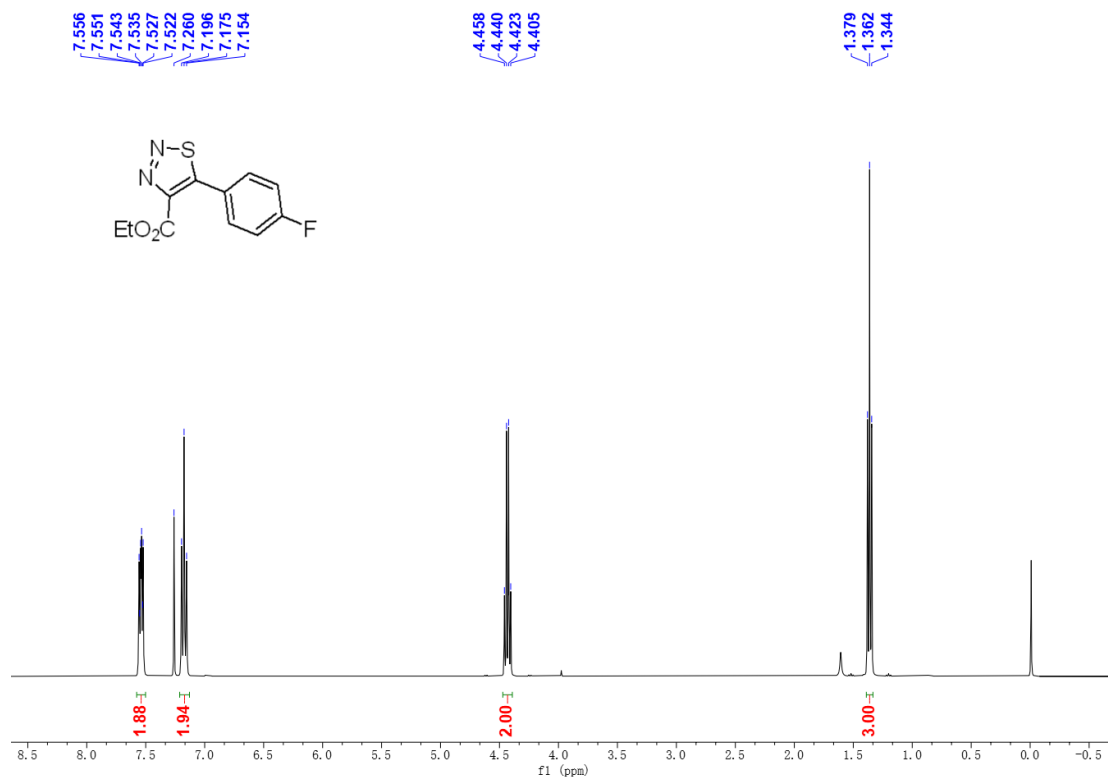

$^{13}\text{C}$  NMR ( $^1\text{H}$ ) (101 MHz,  $\text{CDCl}_3$ )

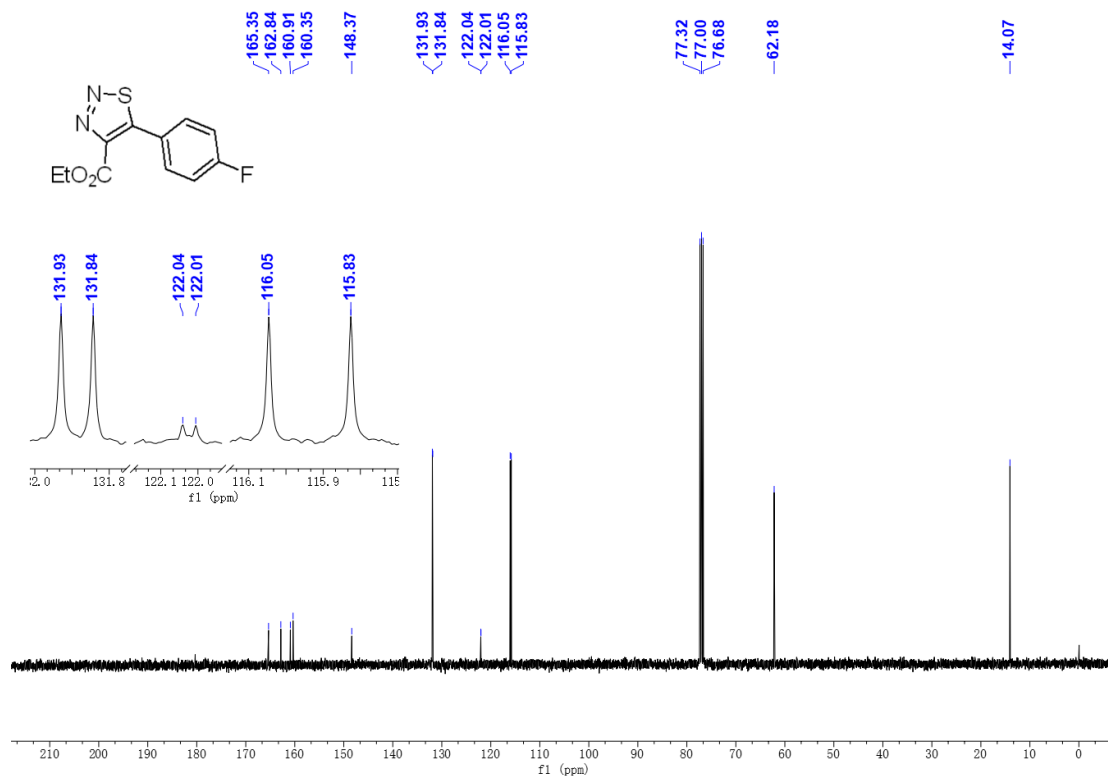

# $^{19}\text{F}$ NMR{ $^1\text{H}$ } (376 MHz, $\text{CDCl}_3$ )

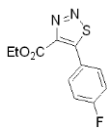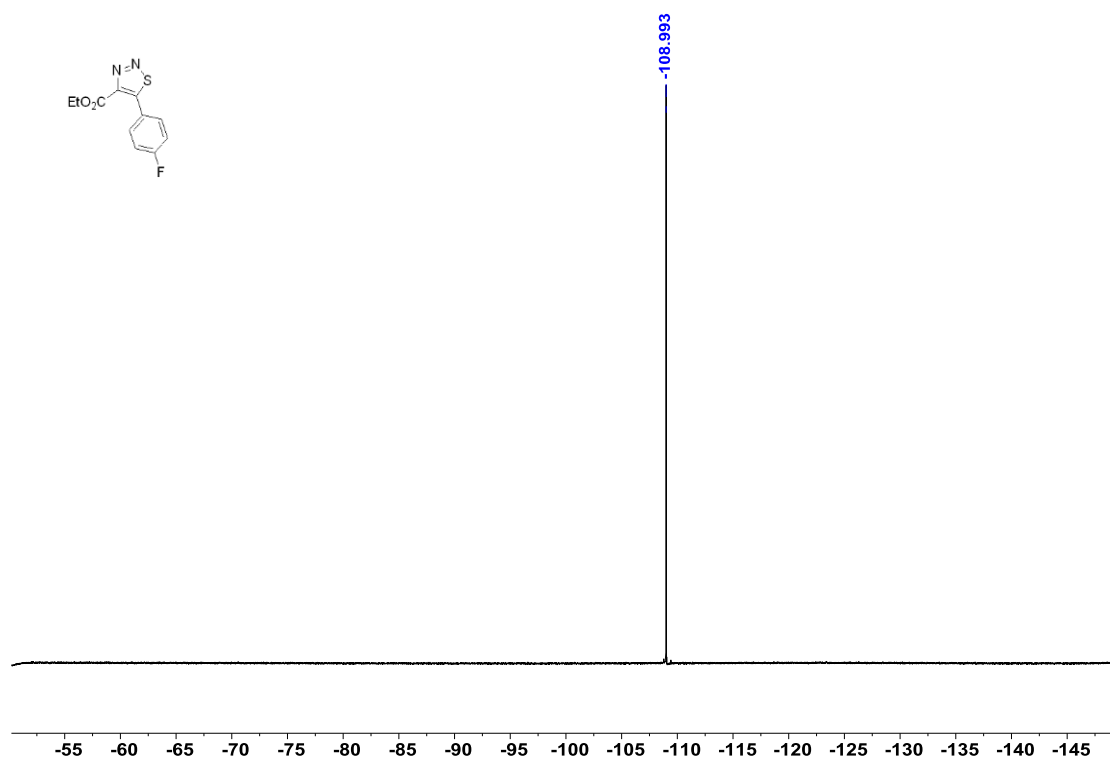

## HRMS

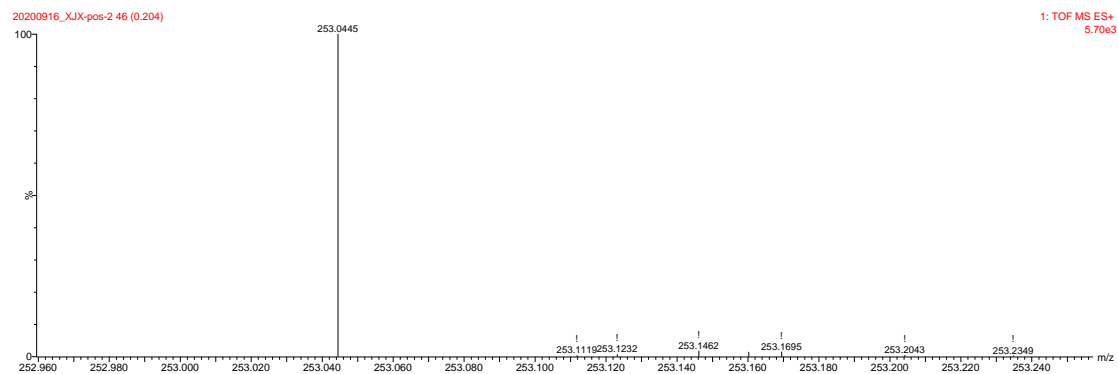

Ethyl 5-(4-chlorophenyl)-1,2,3-thiadiazole-4-carboxylate (**1f**)

$^1\text{H}$  MNR (400 MHz,  $\text{CDCl}_3$ )

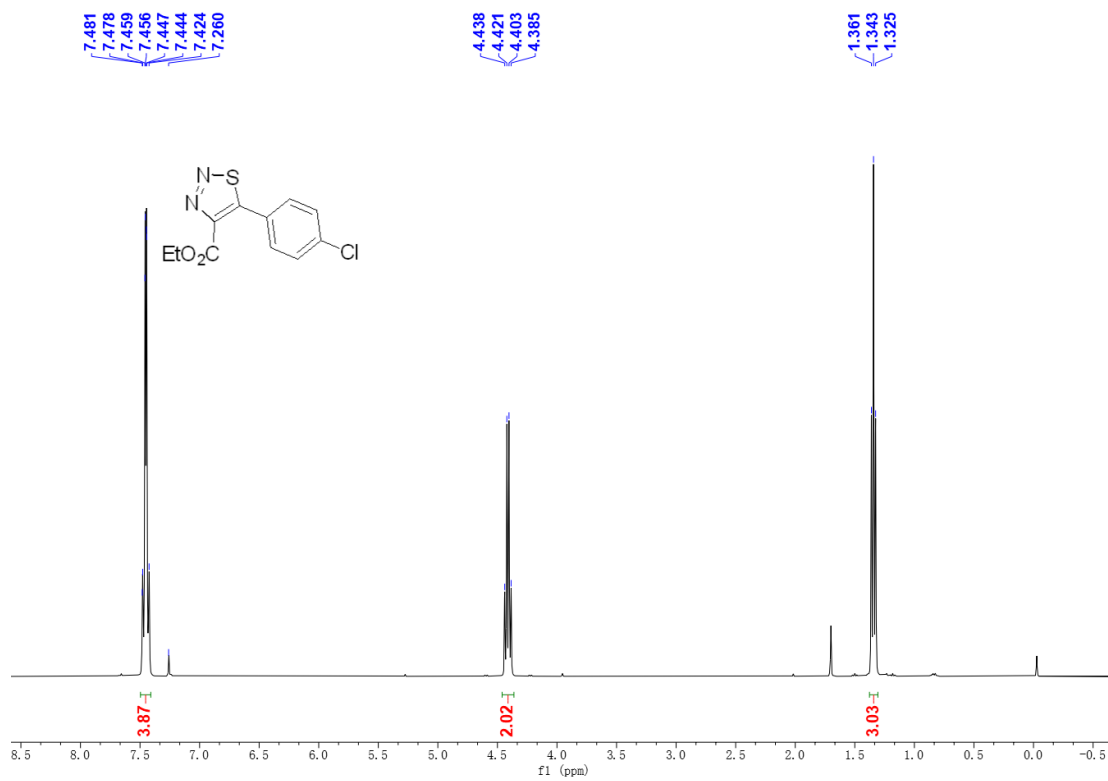

$^{13}\text{C}$  NMR{ $^1\text{H}$ } (101 MHz,  $\text{CDCl}_3$ )

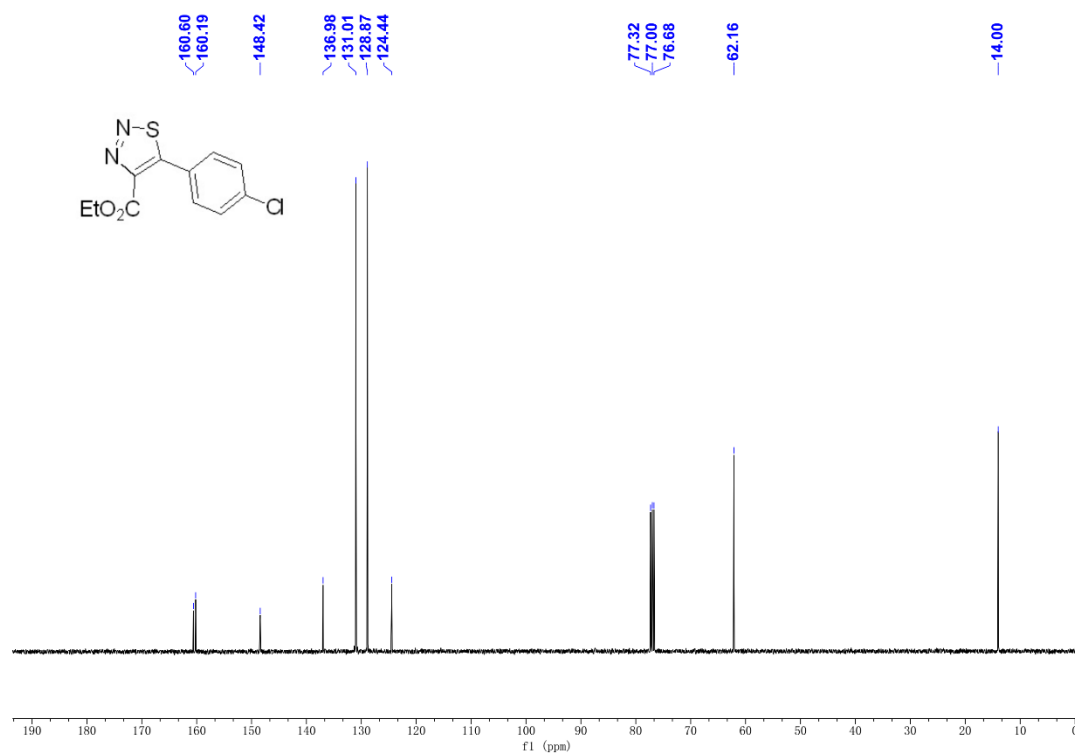

# HRMS

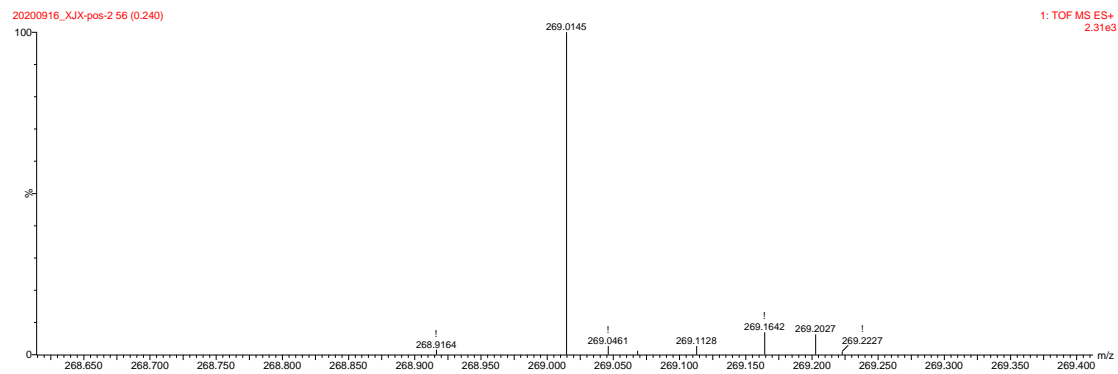

Ethyl 5-(3,4-dichlorophenyl)-1,2,3-thiadiazole-4-carboxylate (**1g**)

$^1\text{H}$  NMR (400 MHz,  $\text{CDCl}_3$ )

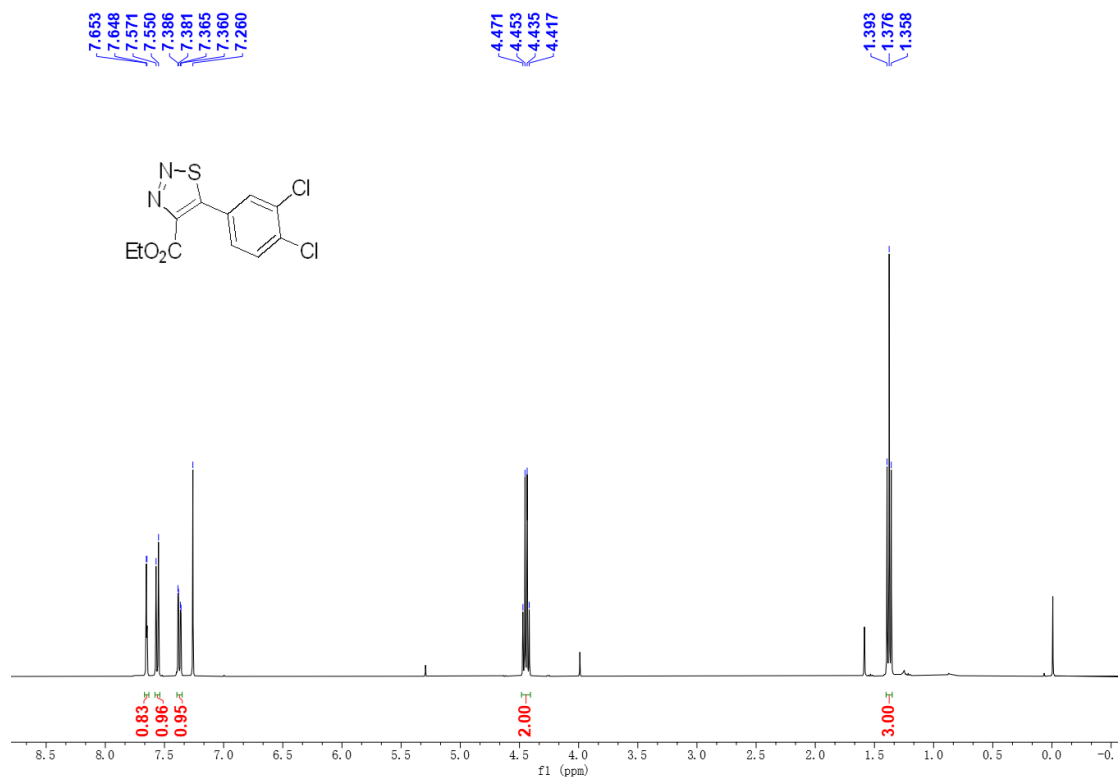

$^{13}\text{C}$  NMR ( $^1\text{H}$ ) (101 MHz,  $\text{CDCl}_3$ )

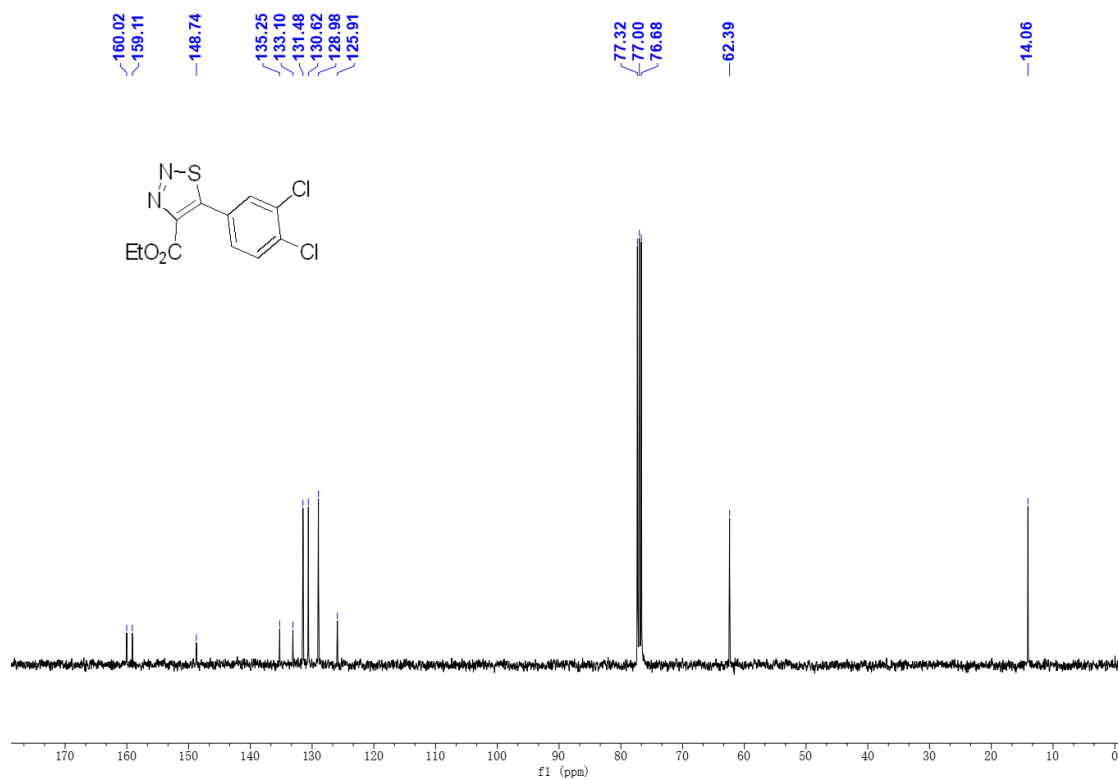

# HRMS

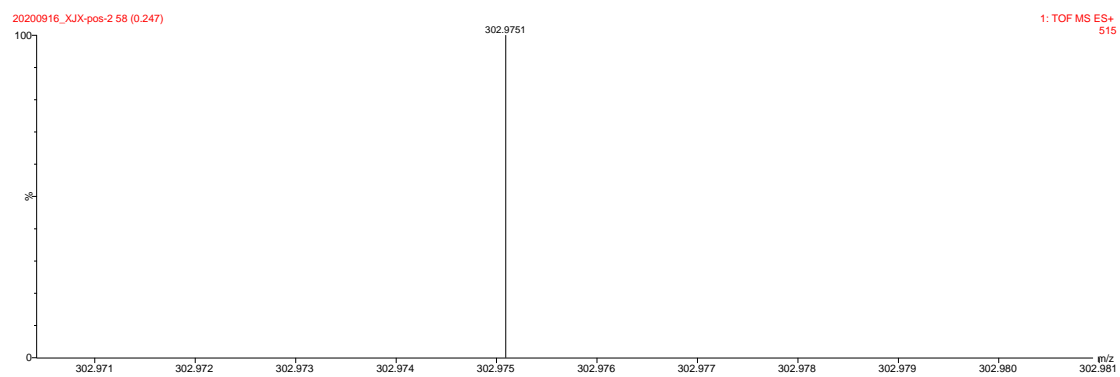

Ethyl 5-(4-iodophenyl)-1,2,3-thiadiazole-4-carboxylate (**1h**)

$^1\text{H}$  NMR (400 MHz,  $\text{CDCl}_3$ )

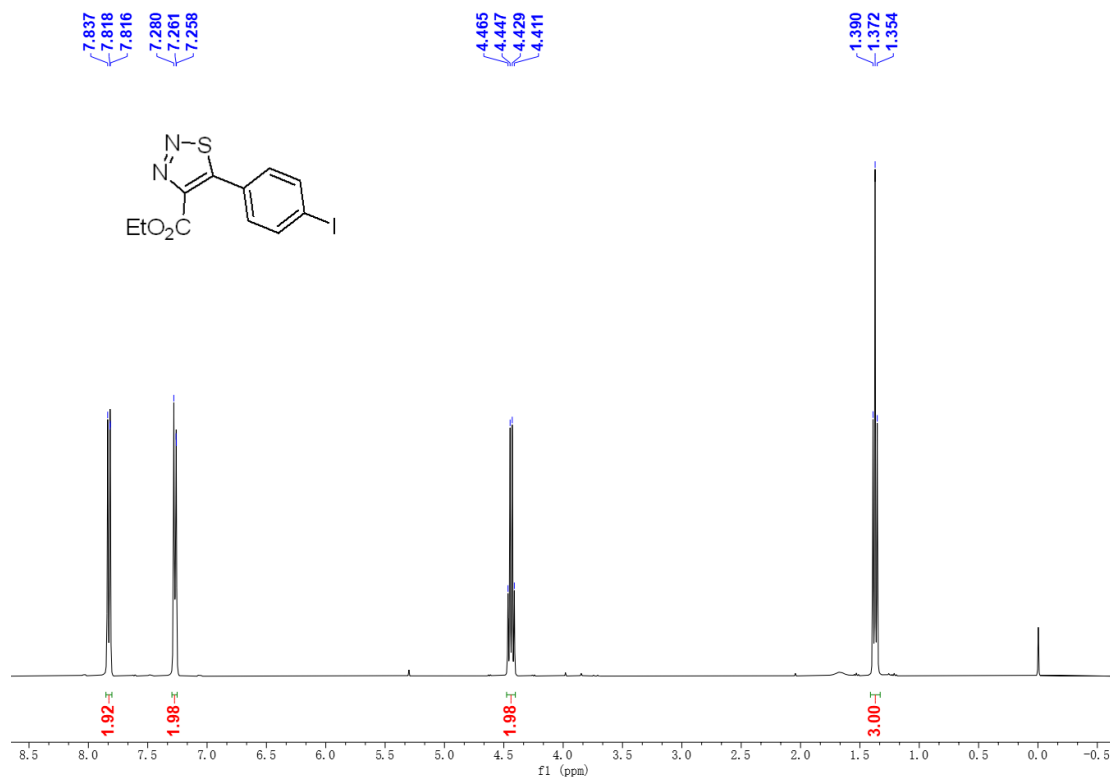

$^{13}\text{C}$  NMR ( $^1\text{H}$ ) (101 MHz,  $\text{CDCl}_3$ )

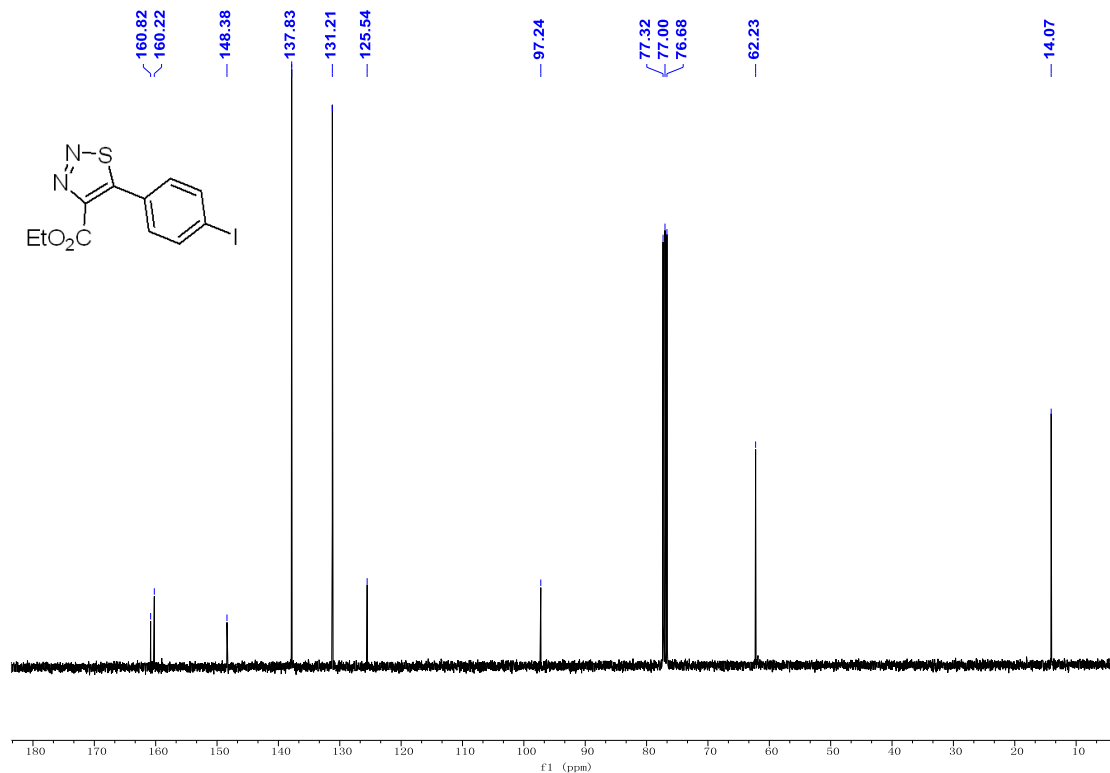



# HRMS

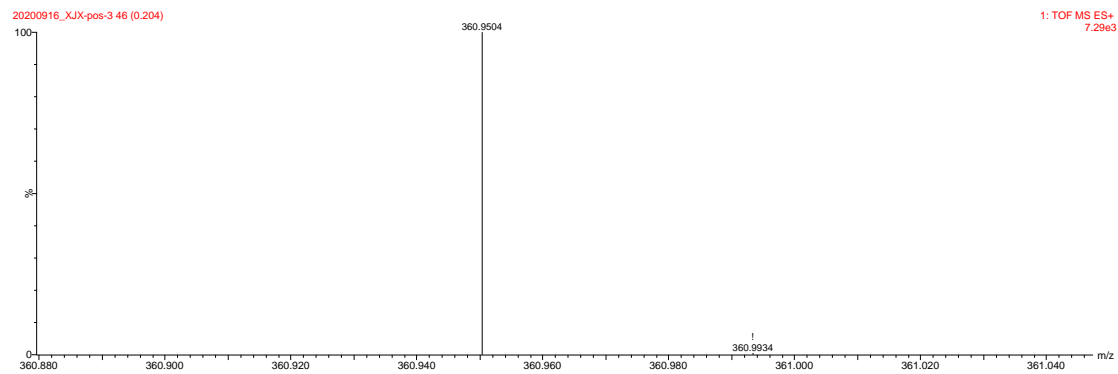

Ethyl 5-(4-(trifluoromethyl)phenyl)-1,2,3-thiadiazole-4-carboxylate (**1i**)

<sup>1</sup>H NMR (400 MHz, CDCl<sub>3</sub>)

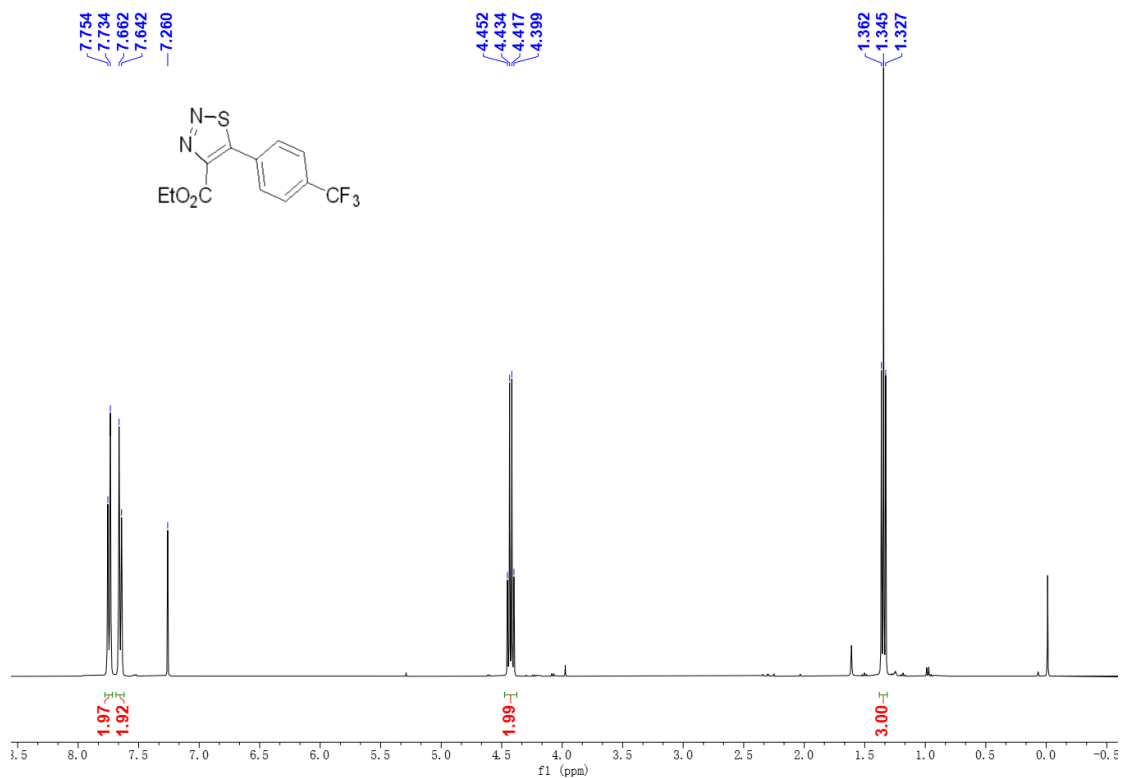

<sup>13</sup>C NMR{<sup>1</sup>H} (101 MHz, CDCl<sub>3</sub>)

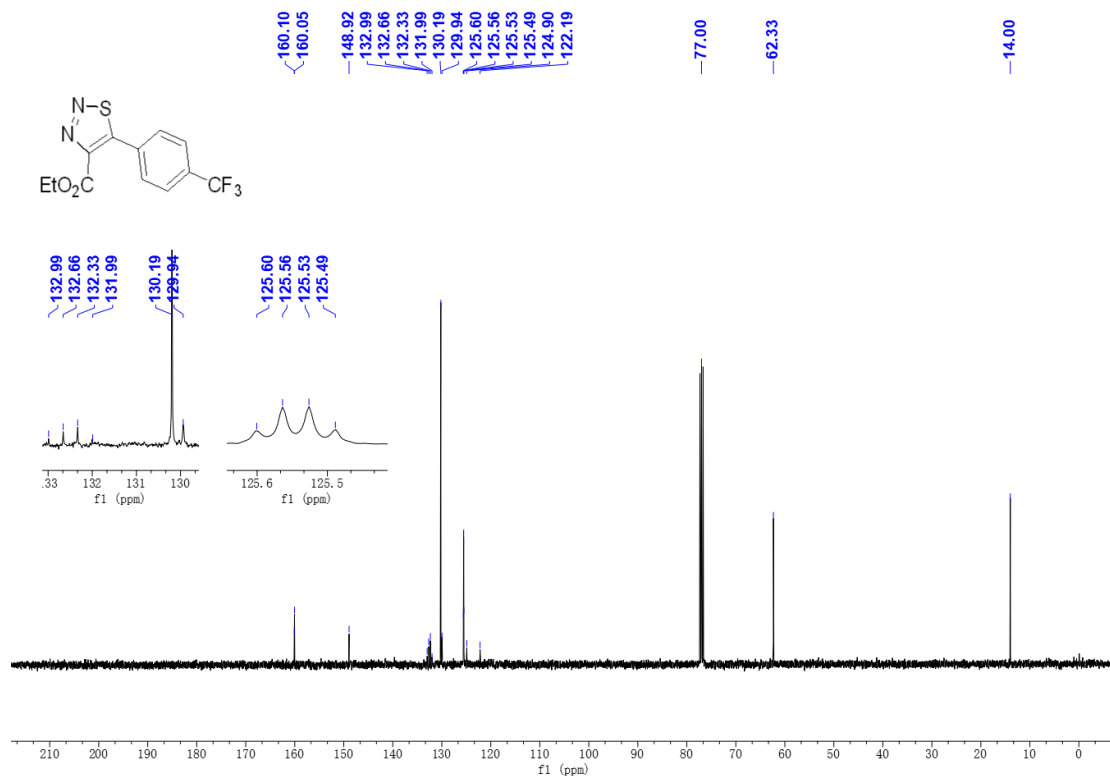

**$^{19}\text{F}$  NMR{ $^1\text{H}$  } (376 MHz,  $\text{CDCl}_3$ )**

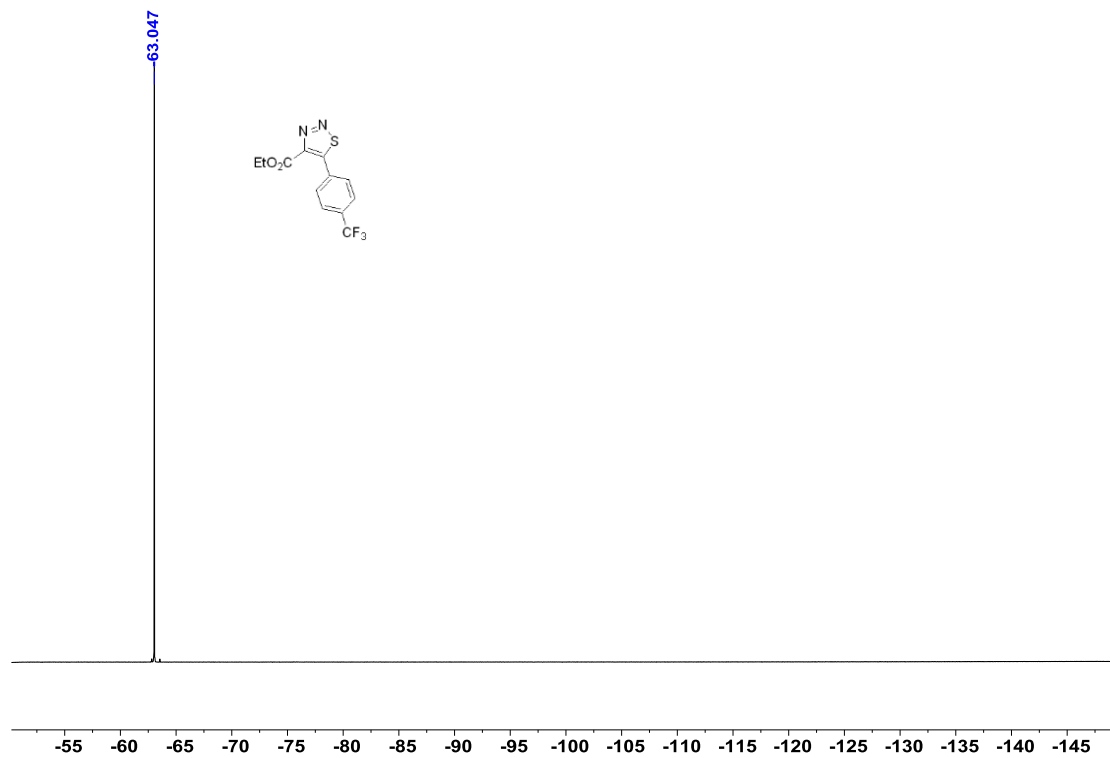

**HRMS**

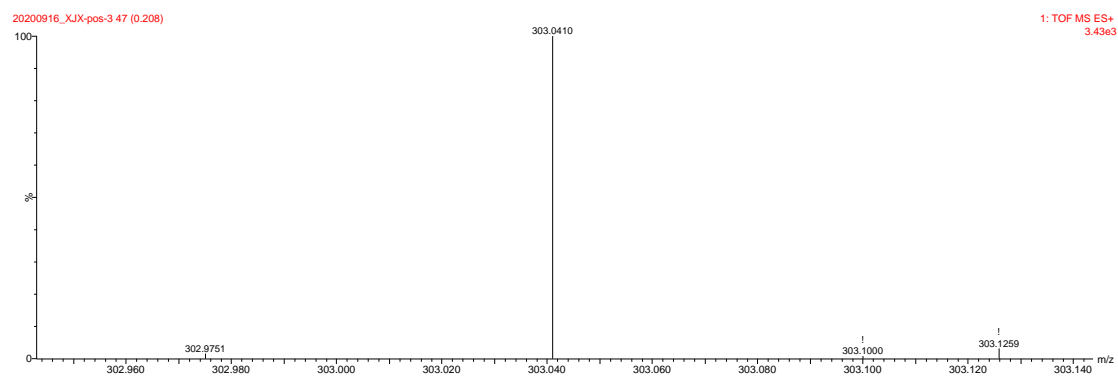

Ethyl 5-(4-cyanophenyl)-1,2,3-thiadiazole-4-carboxylate (**1j**)

<sup>1</sup>H NMR (400 MHz, CDCl<sub>3</sub>)

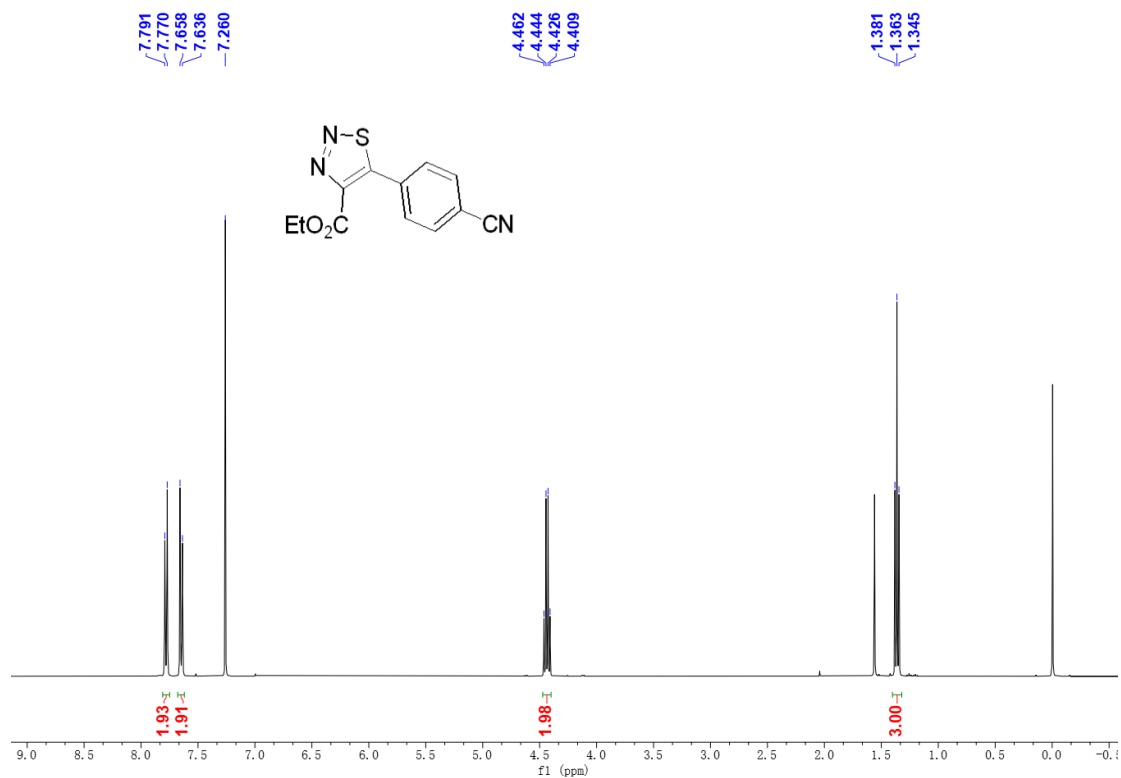

<sup>13</sup>C NMR{<sup>1</sup>H} (101 MHz, CDCl<sub>3</sub>)

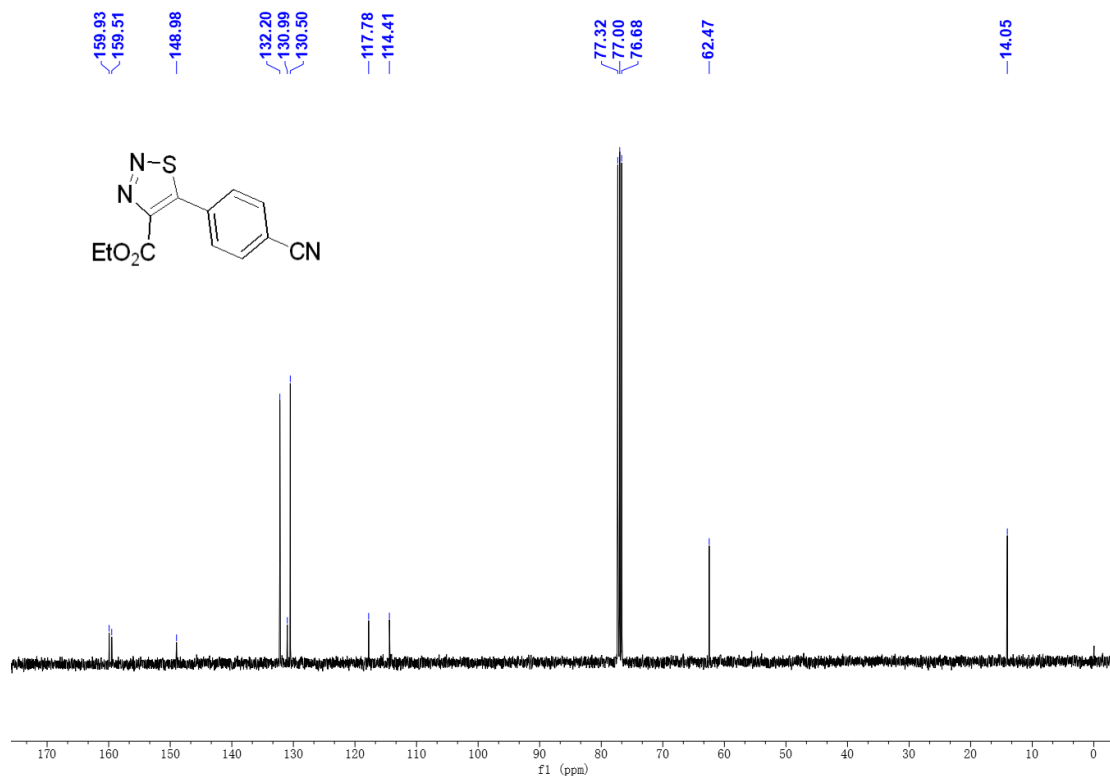

Ethyl 5-(furan-2-yl)-1,2,3-thiadiazole-4-carboxylate (**1k**)

<sup>1</sup>H NMR (400 MHz, CDCl<sub>3</sub>)

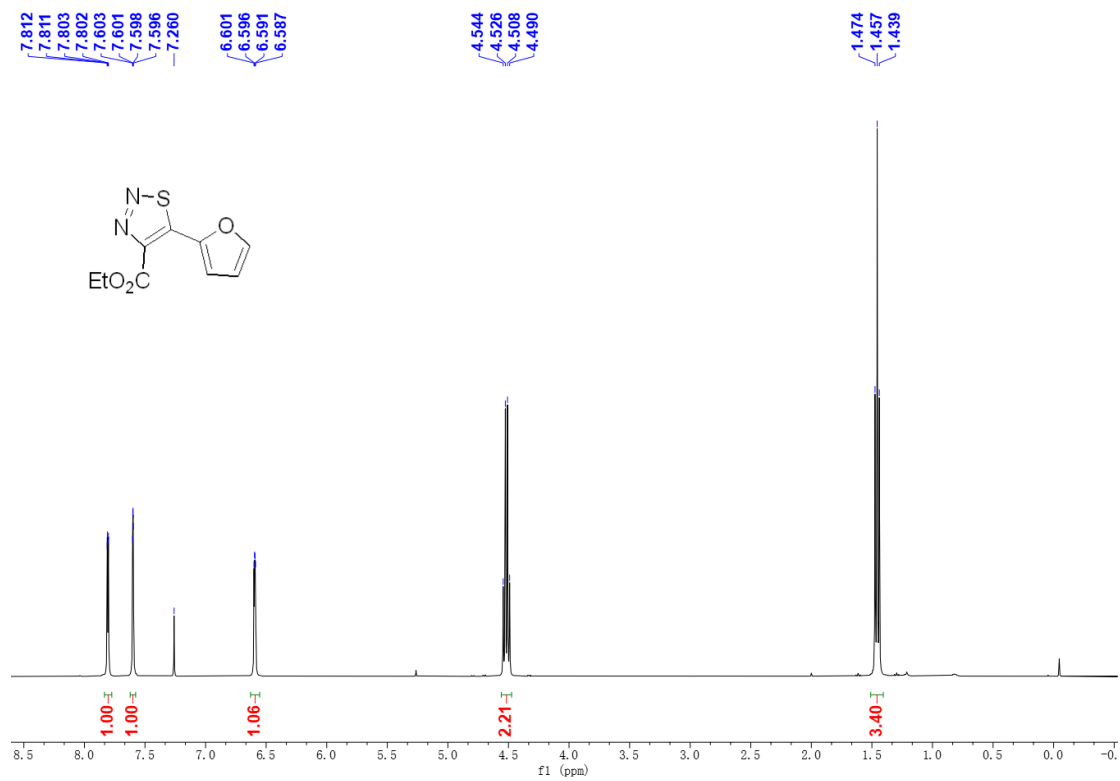

<sup>13</sup>C NMR{<sup>1</sup>H} (101 MHz, CDCl<sub>3</sub>)

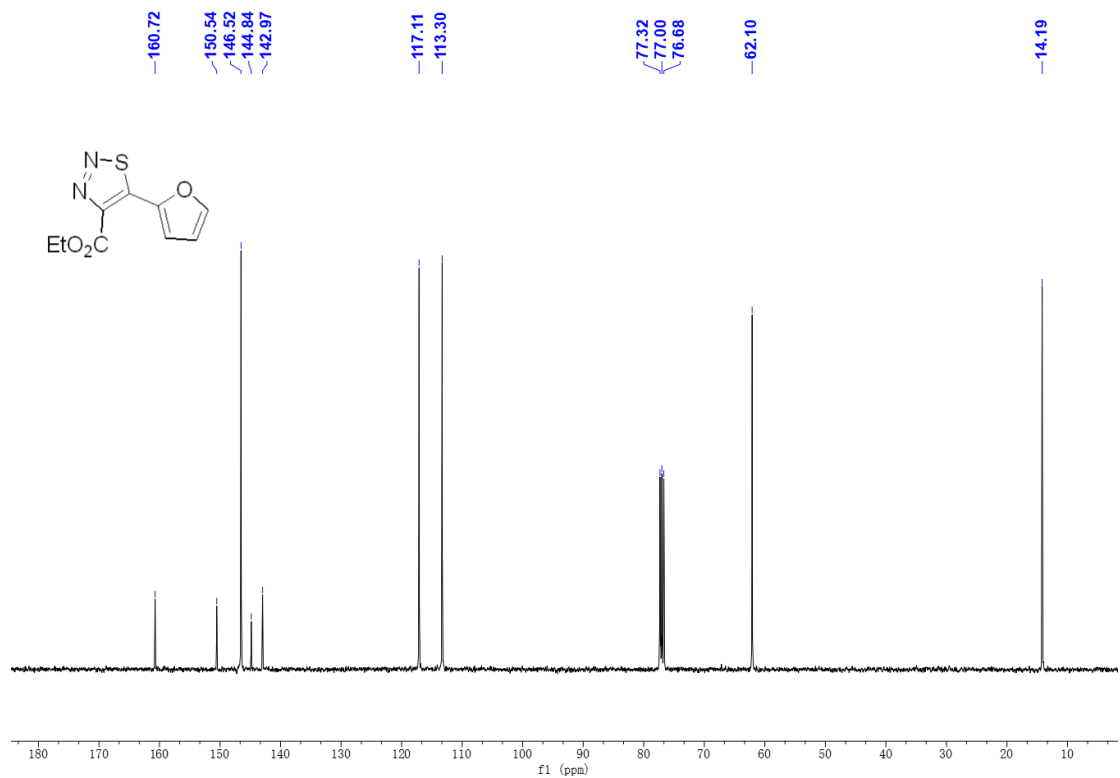

Ethyl 5-(thiophen-2-yl)-1,2,3-thiadiazole-4-carboxylate (**1I**)

<sup>1</sup>H NMR (400 MHz, CDCl<sub>3</sub>)

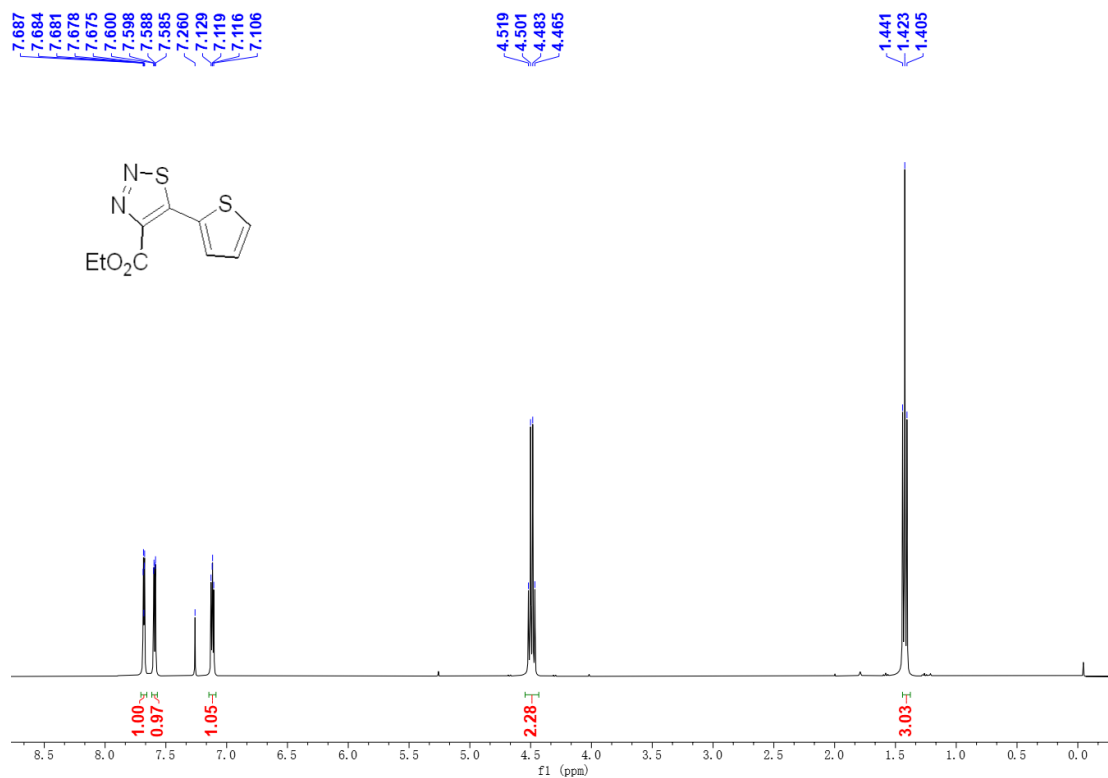

<sup>13</sup>C NMR{<sup>1</sup>H} (101 MHz, CDCl<sub>3</sub>)

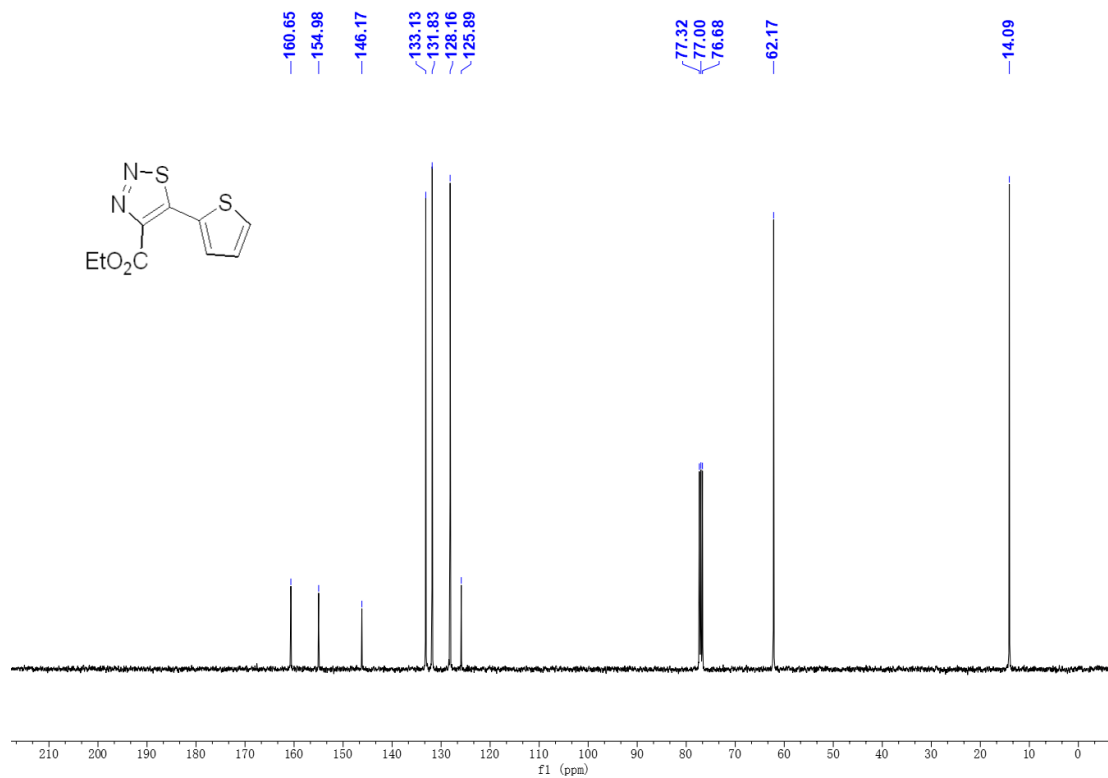

Ethyl 5-(naphthalen-2-yl)-1,2,3-thiadiazole-4-carboxylate (**1m**)

<sup>1</sup>H NMR (400 MHz, CDCl<sub>3</sub>)

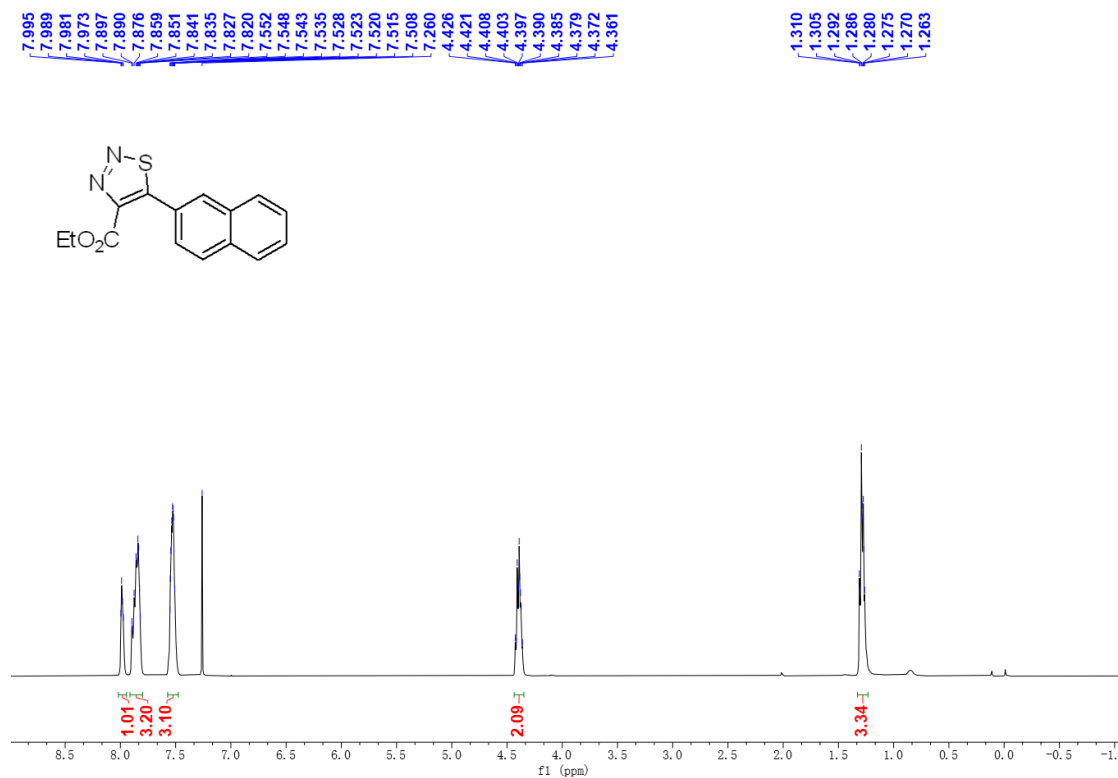

<sup>13</sup>C NMR{<sup>1</sup>H} (101 MHz, CDCl<sub>3</sub>)

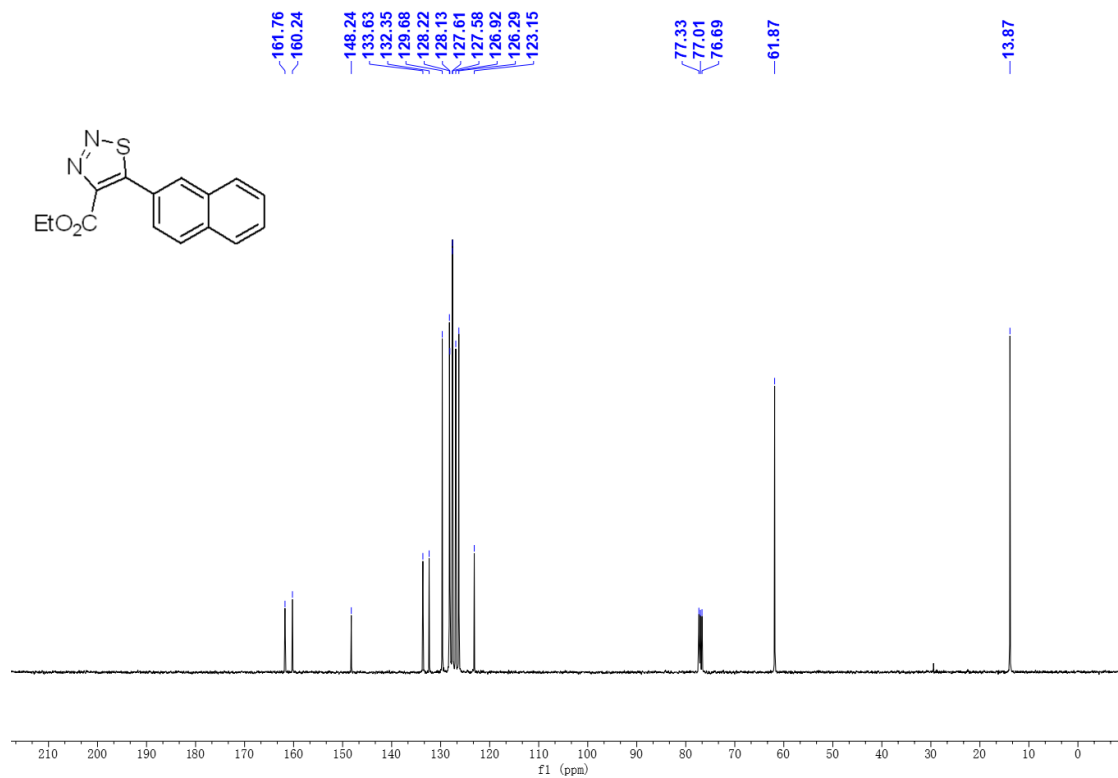

# HRMS

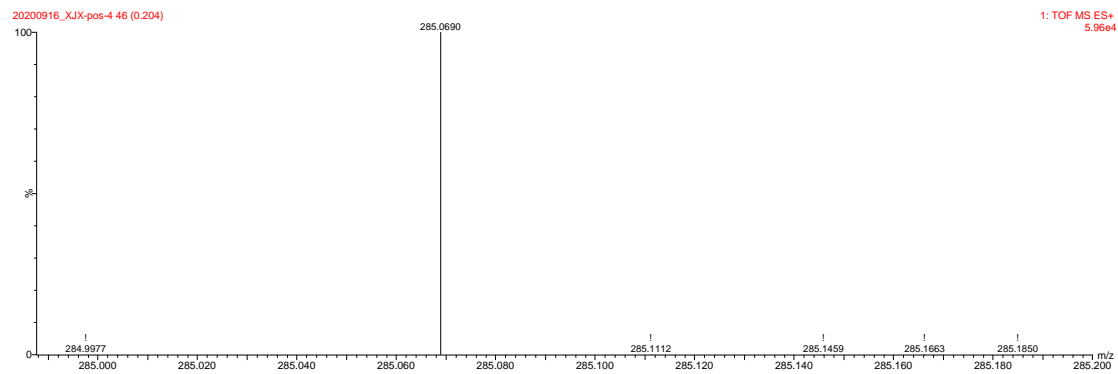



(Z)-3-Phenylacrylaldehyde [(Z)-2g]

<sup>1</sup>H NMR (400 MHz, CDCl<sub>3</sub>)

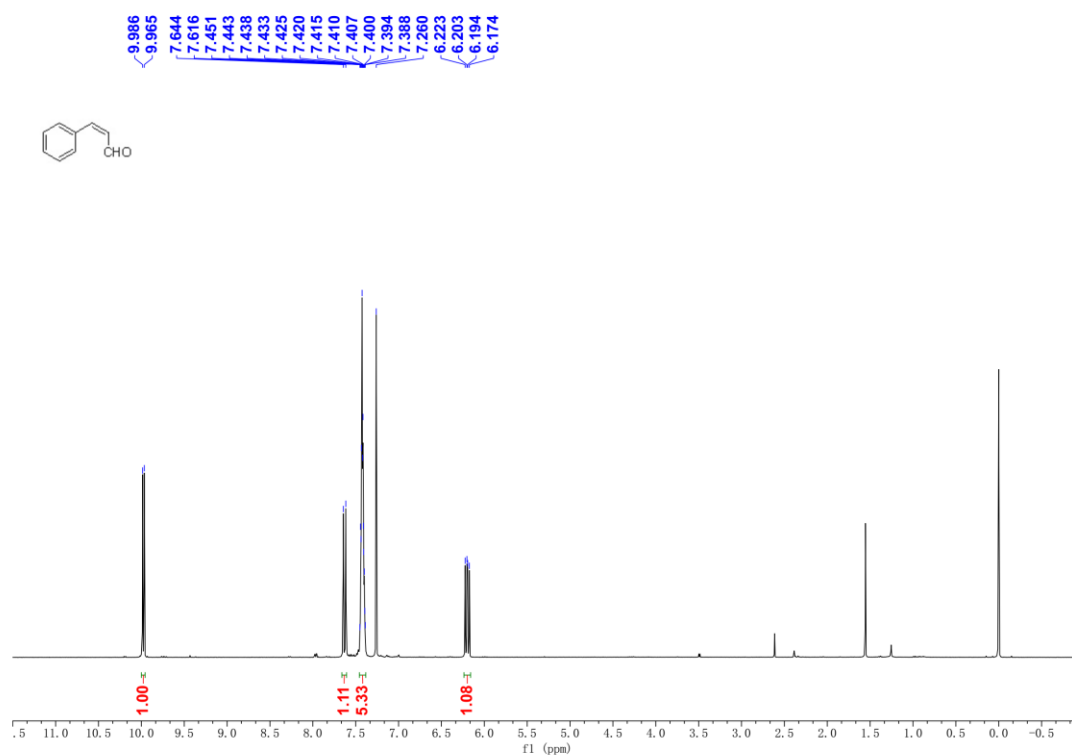

<sup>13</sup>C NMR{<sup>1</sup>H} (101 MHz, CDCl<sub>3</sub>)

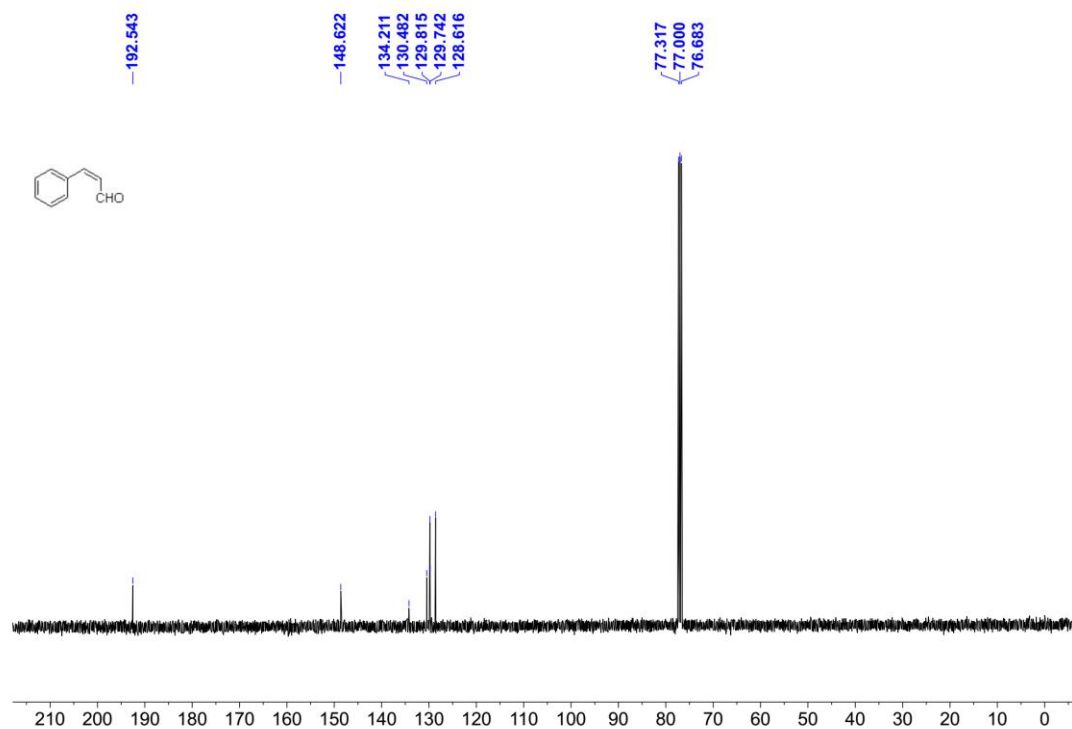

Cinnamaldehyde-1-d (2g-d)

$^1\text{H}$  MNR (400 MHz,  $\text{CDCl}_3$ )

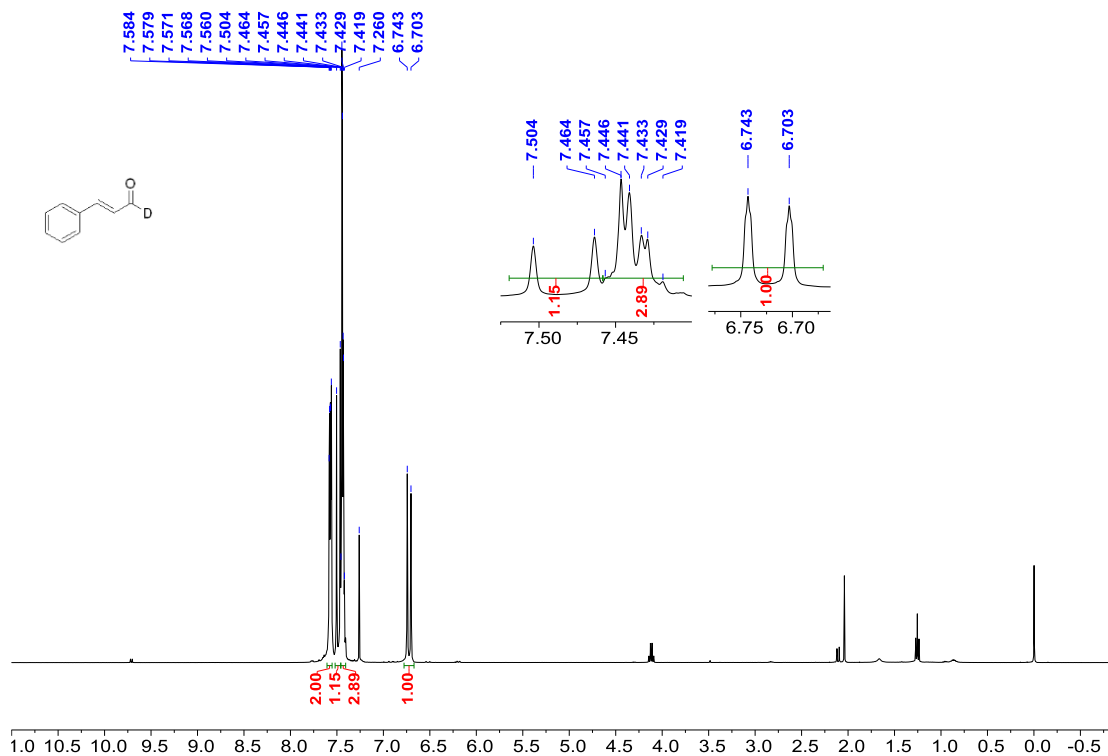

$^{13}\text{C}$  NMR{ $^1\text{H}$ } (101 MHz,  $\text{CDCl}_3$ )

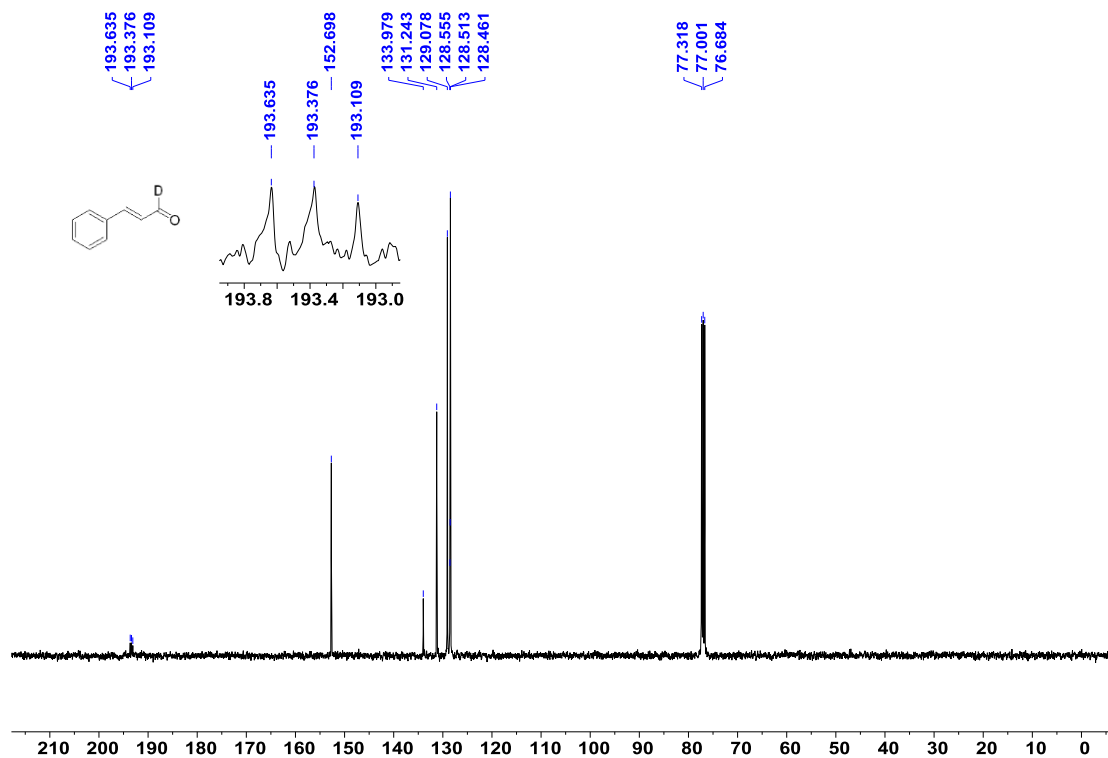

# HRMS

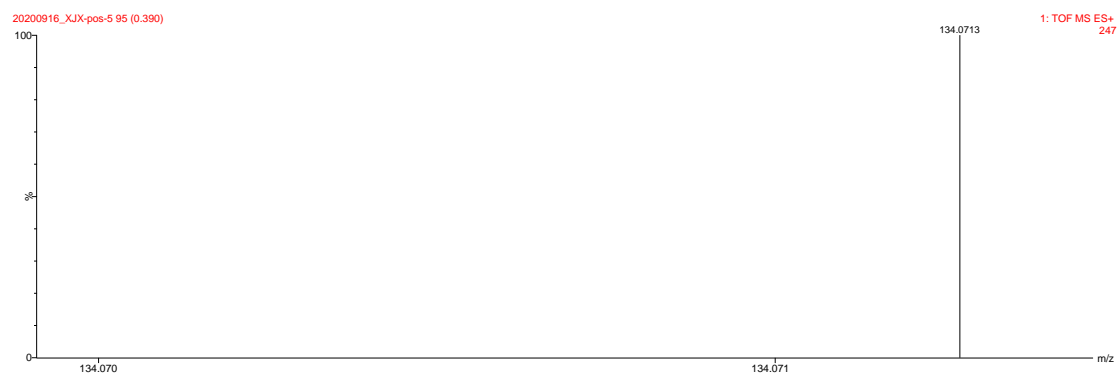

3-(2,3-Dichlorophenyl)acrylaldehyde (**2j**)

$^1\text{H}$  NMR (400 MHz,  $\text{CDCl}_3$ )

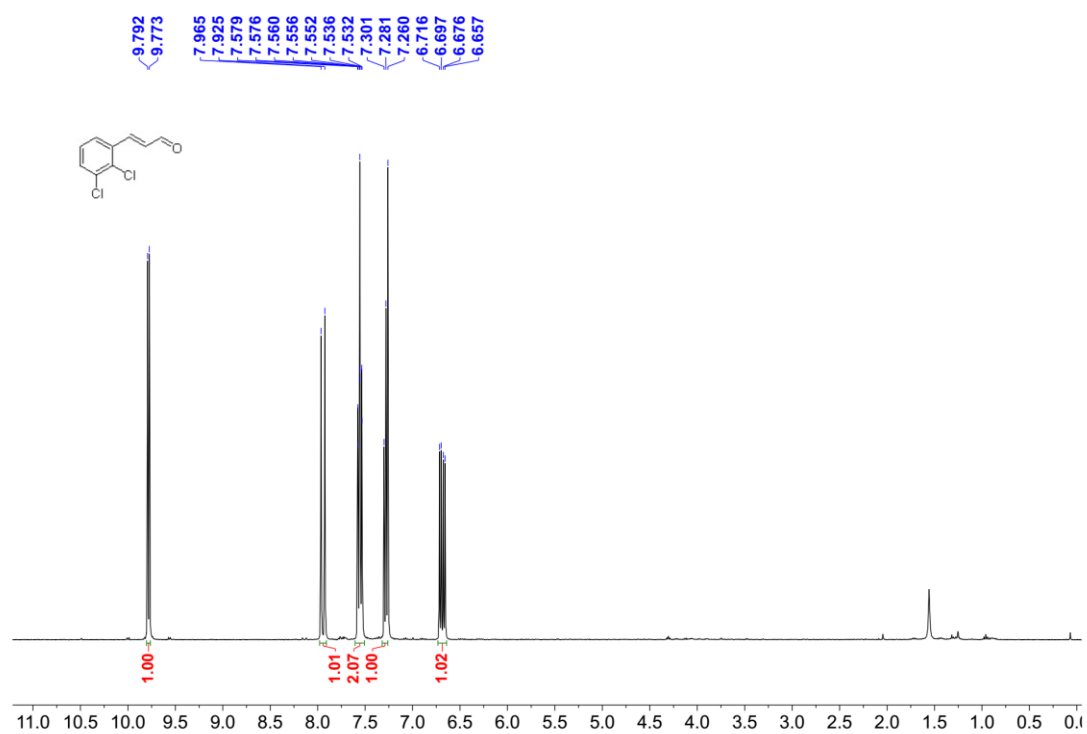

$^{13}\text{C}$  NMR ( $^1\text{H}$ ) (101 MHz,  $\text{CDCl}_3$ )

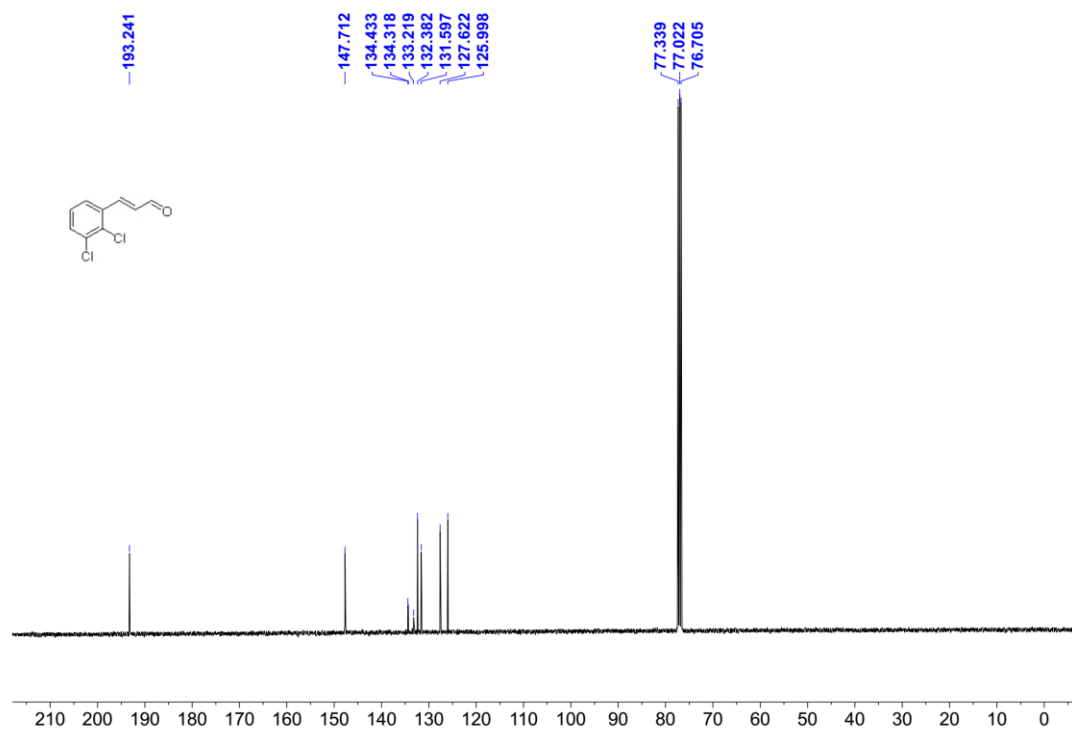

(E)-3-(Naphthalen-2-yl)propenal (2I)

<sup>1</sup>H NMR (400 MHz, CDCl<sub>3</sub>)

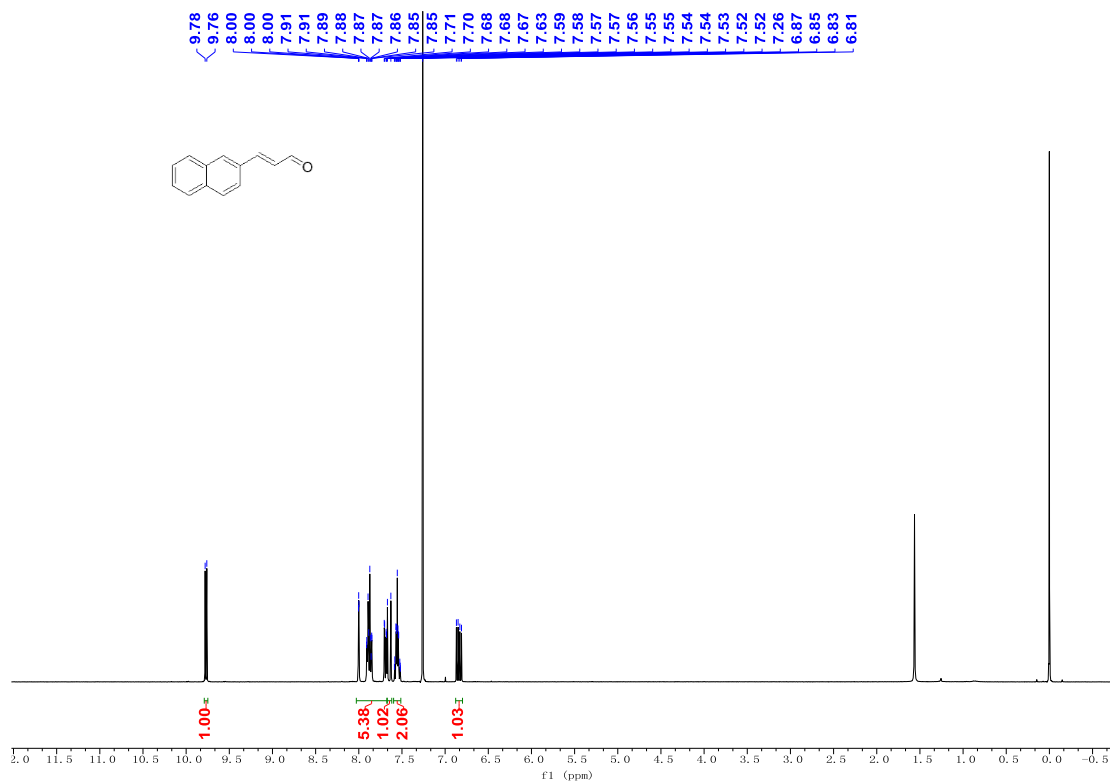

<sup>13</sup>C NMR{<sup>1</sup>H} (101 MHz, CDCl<sub>3</sub>)

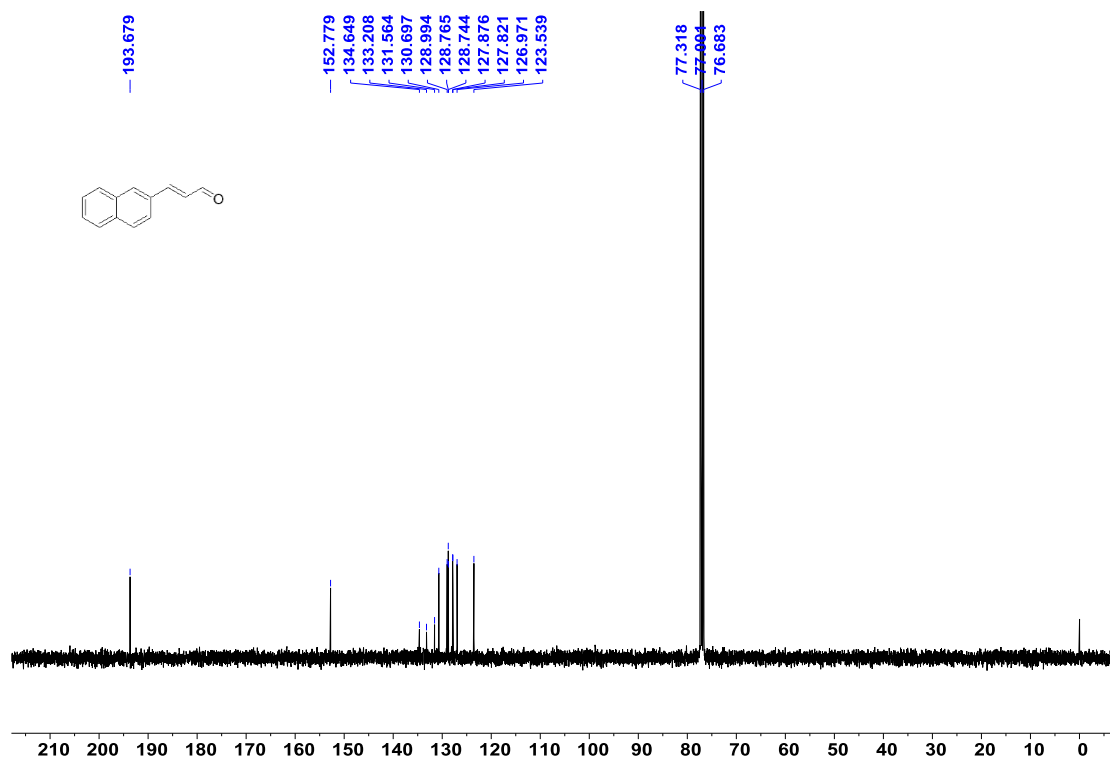

(E)-5-Phenylpenta-2,4-dienal (**2m**)

<sup>1</sup>H NMR (400 MHz, CDCl<sub>3</sub>)

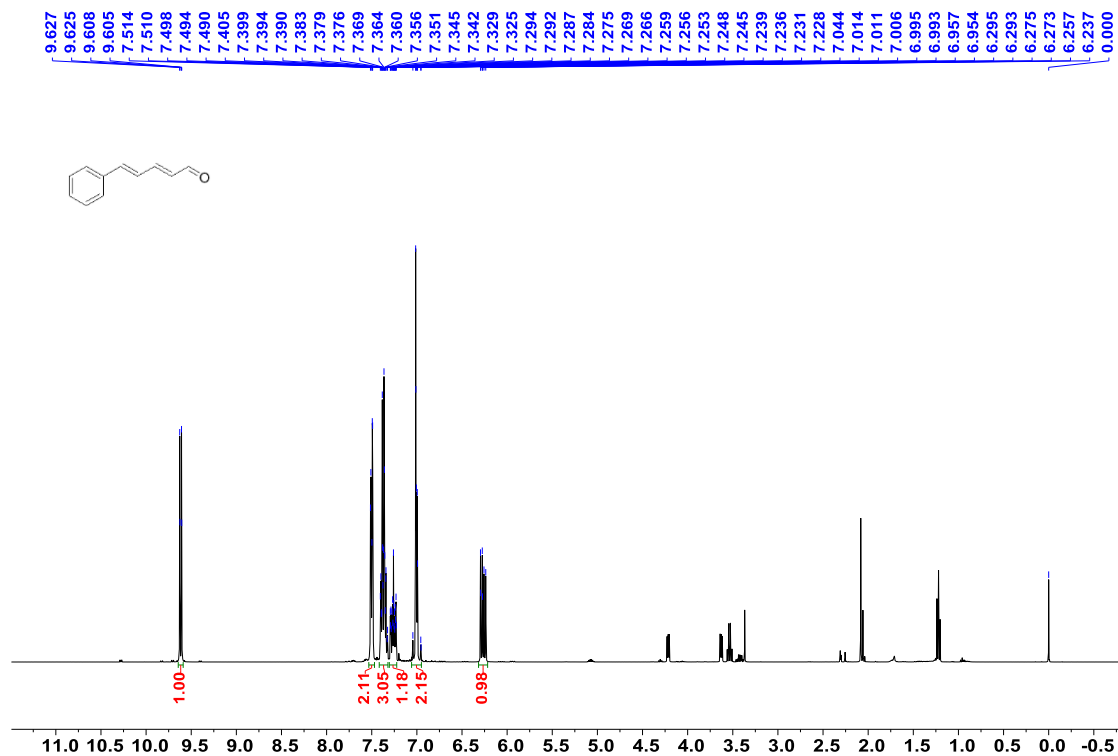

<sup>13</sup>C NMR{<sup>1</sup>H} (101 MHz, CDCl<sub>3</sub>)

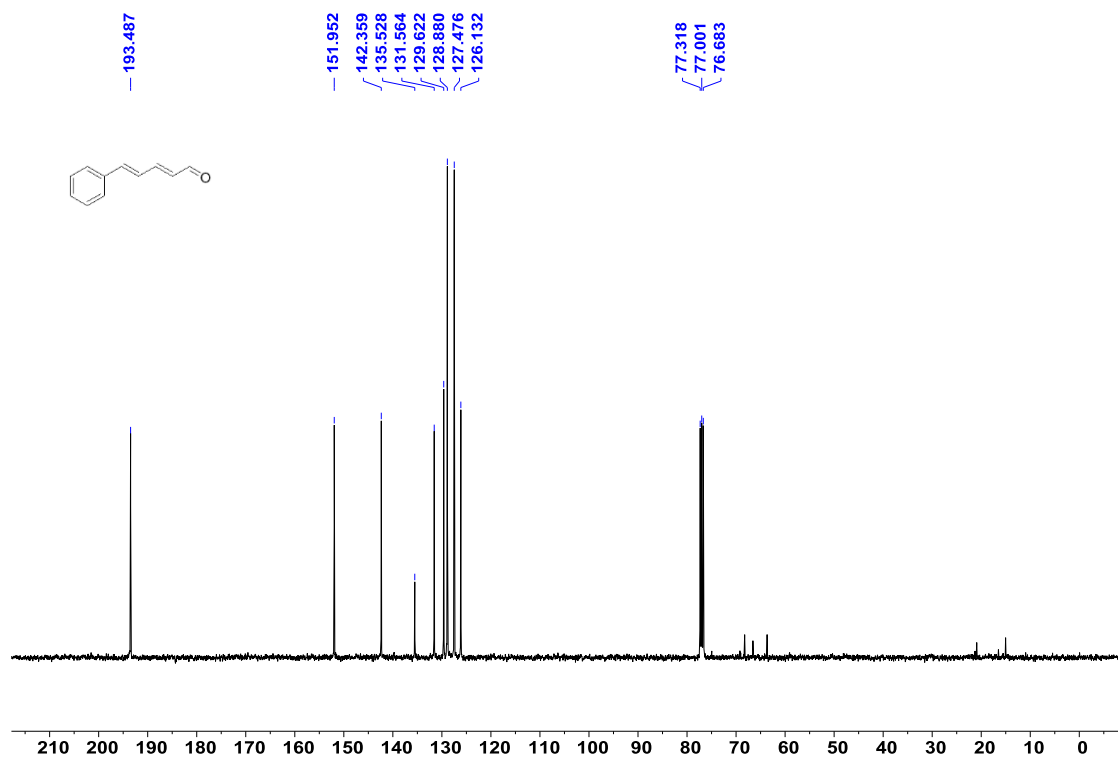

3-((1*R*,5*R*)-6,6-Dimethylbicyclo[3.1.1]hept-2-en-3-yl)acrylaldehyde (**2n**)

<sup>1</sup>H NMR (400 MHz, CDCl<sub>3</sub>)

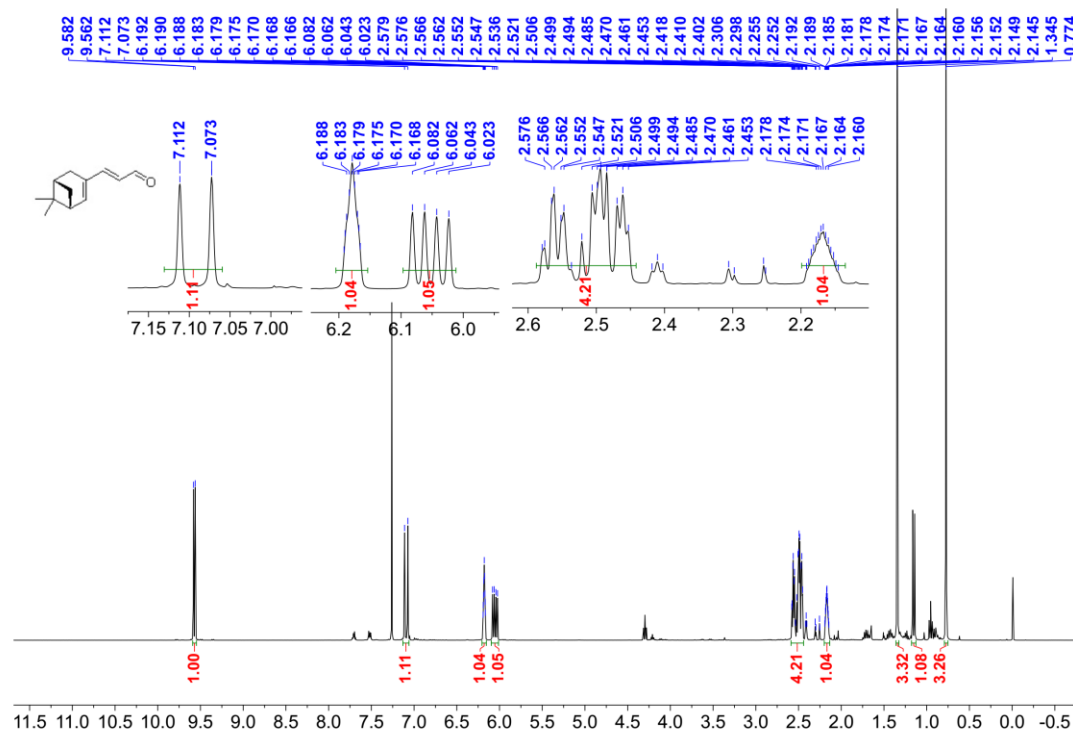

<sup>13</sup>C NMR{<sup>1</sup>H} (101 MHz, CDCl<sub>3</sub>)

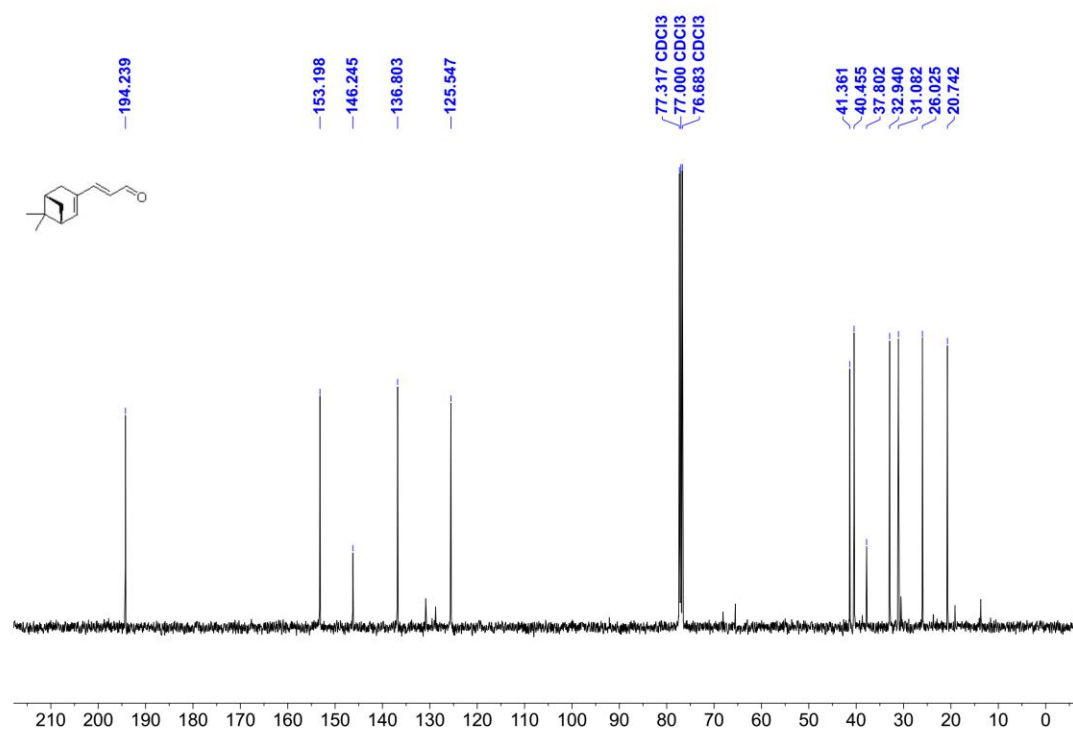

# HRMS

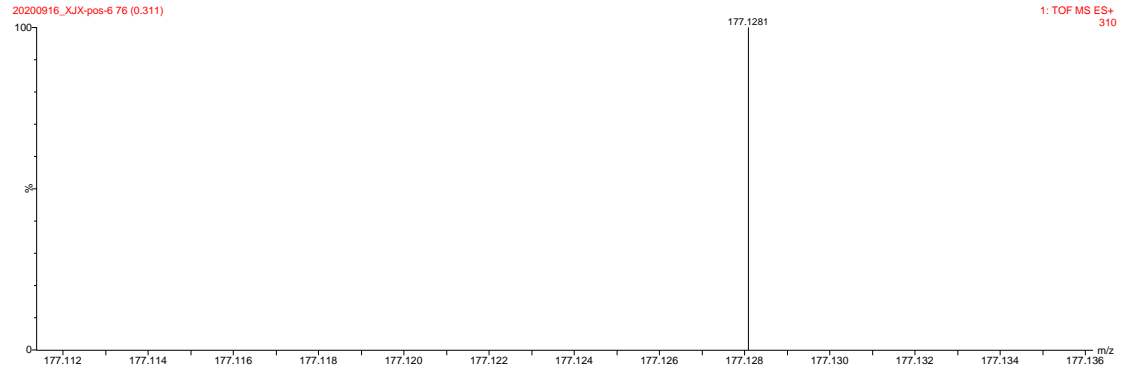



(E)-3-Cyclohexylpropenal (**2o**)

<sup>1</sup>H NMR (400 MHz, CDCl<sub>3</sub>)

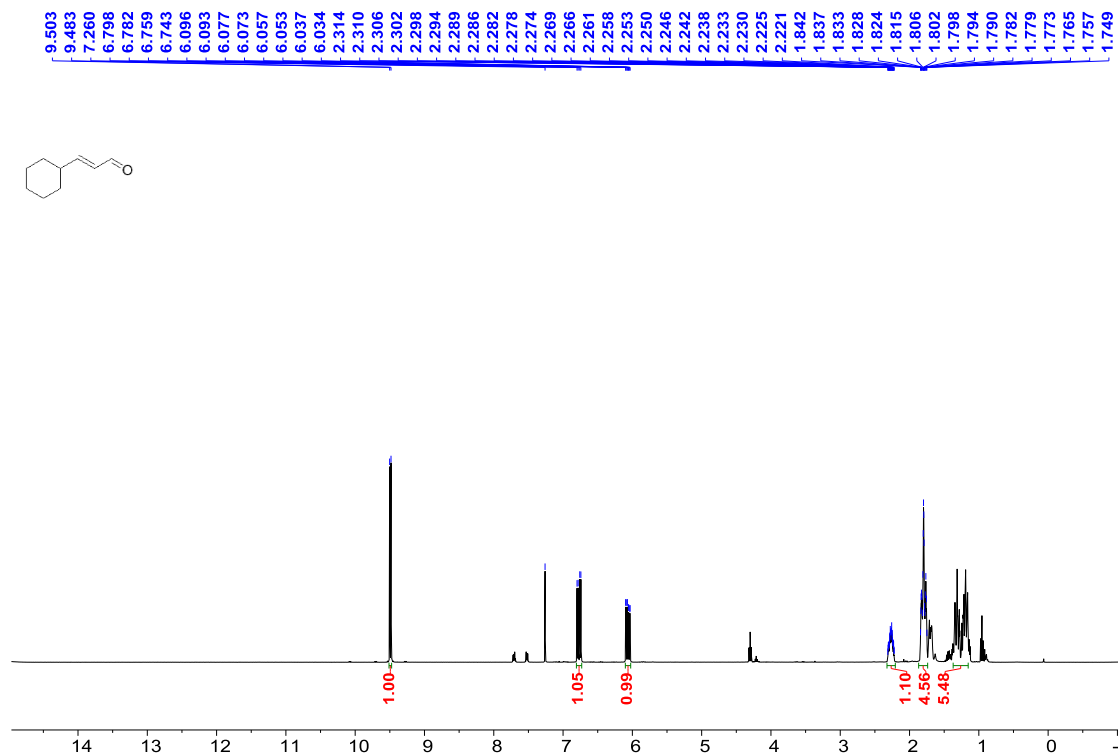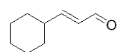

<sup>13</sup>C NMR{<sup>1</sup>H} (101 MHz, CDCl<sub>3</sub>)

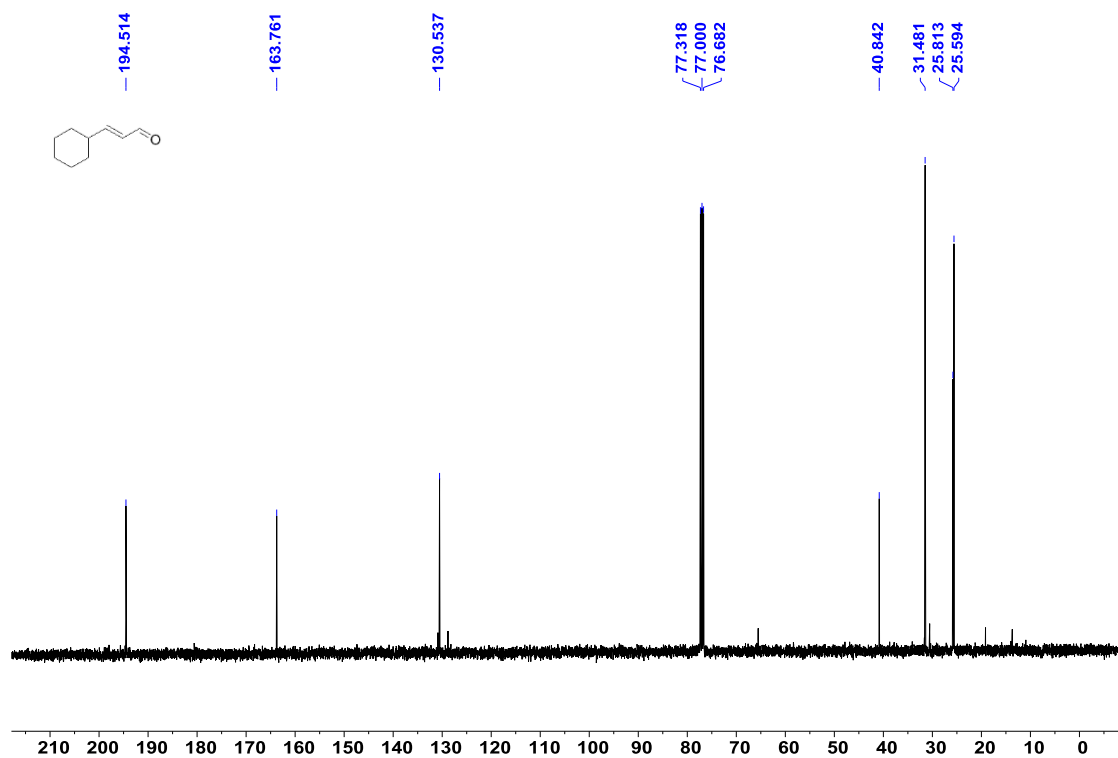

(E)-4-Phenylpent-2-enal (2p)

<sup>1</sup>H NMR (400 MHz, CDCl<sub>3</sub>)

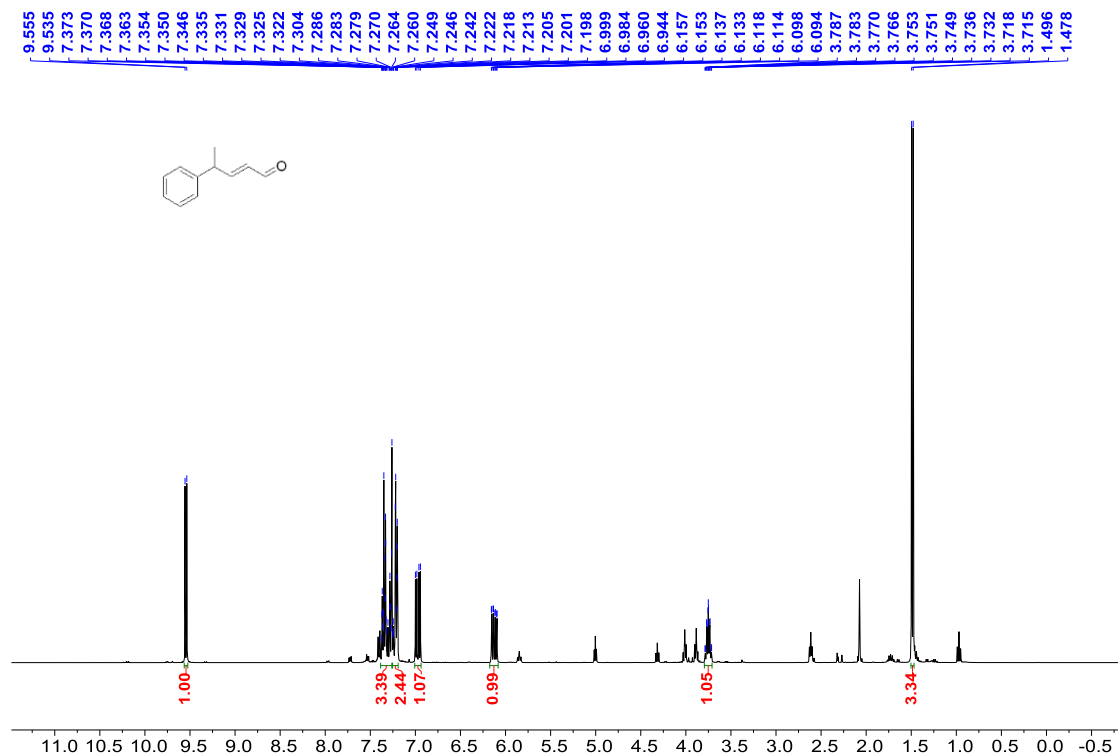

<sup>13</sup>C NMR{<sup>1</sup>H} (101 MHz, CDCl<sub>3</sub>)

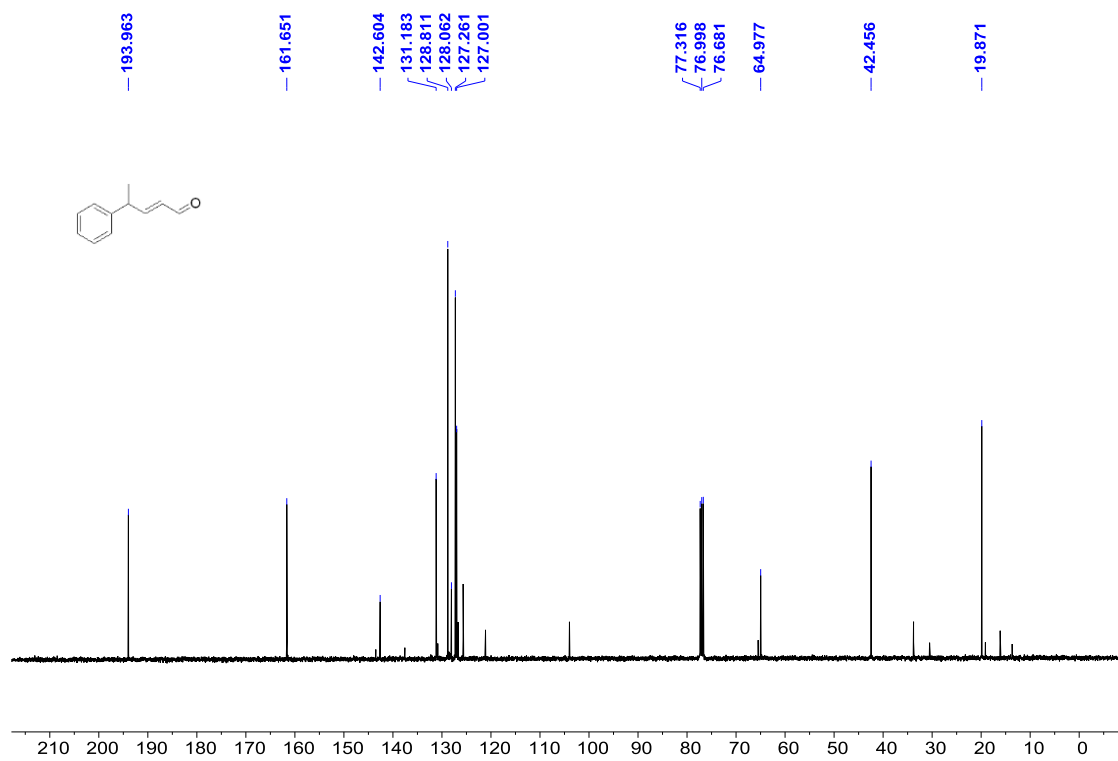

(E)-3-Phenylbut-2-enal (**2s**)

<sup>1</sup>H NMR (400 MHz, CDCl<sub>3</sub>)

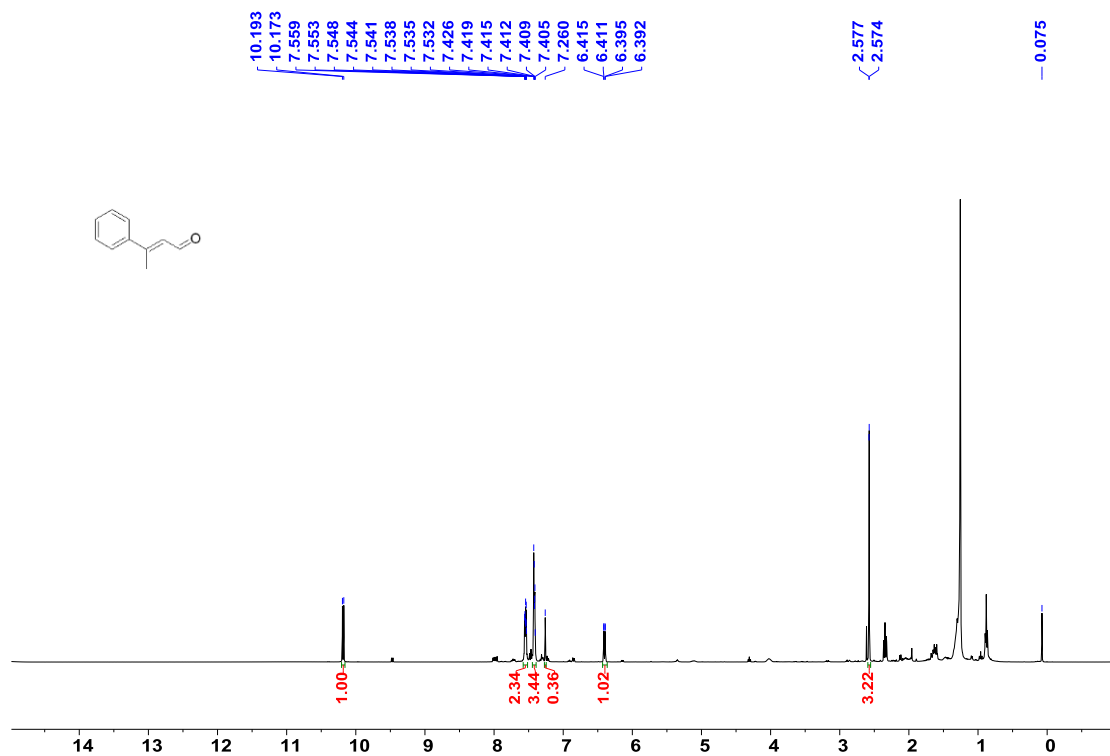

<sup>13</sup>C NMR{<sup>1</sup>H} (101 MHz, CDCl<sub>3</sub>)

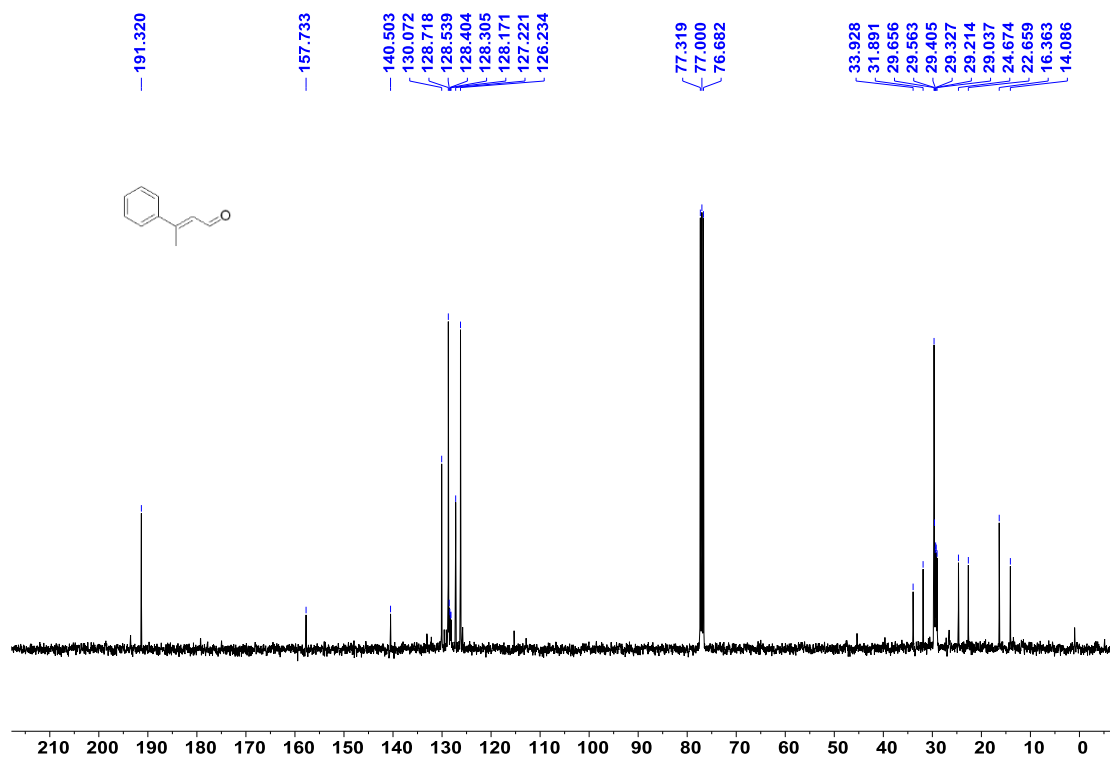

3-Cyclopropylbut-2-enal (2t)  
<sup>1</sup>H NMR (400 MHz, CDCl<sub>3</sub>)

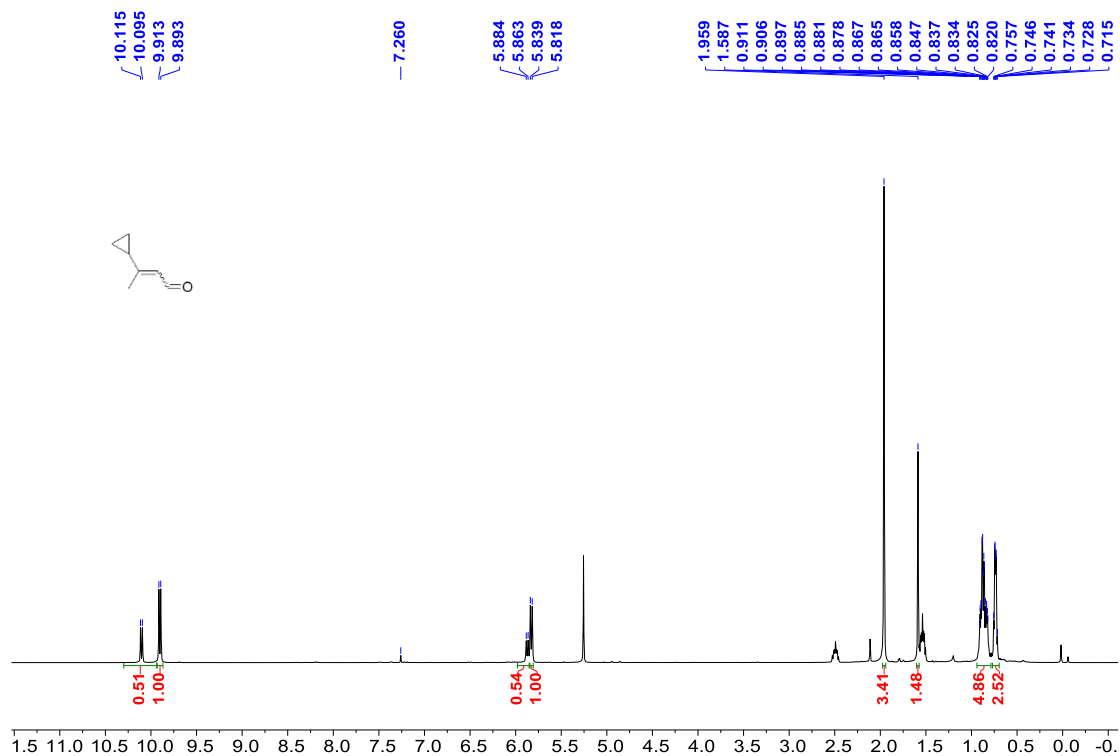

<sup>13</sup>C NMR{<sup>1</sup>H} (101 MHz, CDCl<sub>3</sub>)

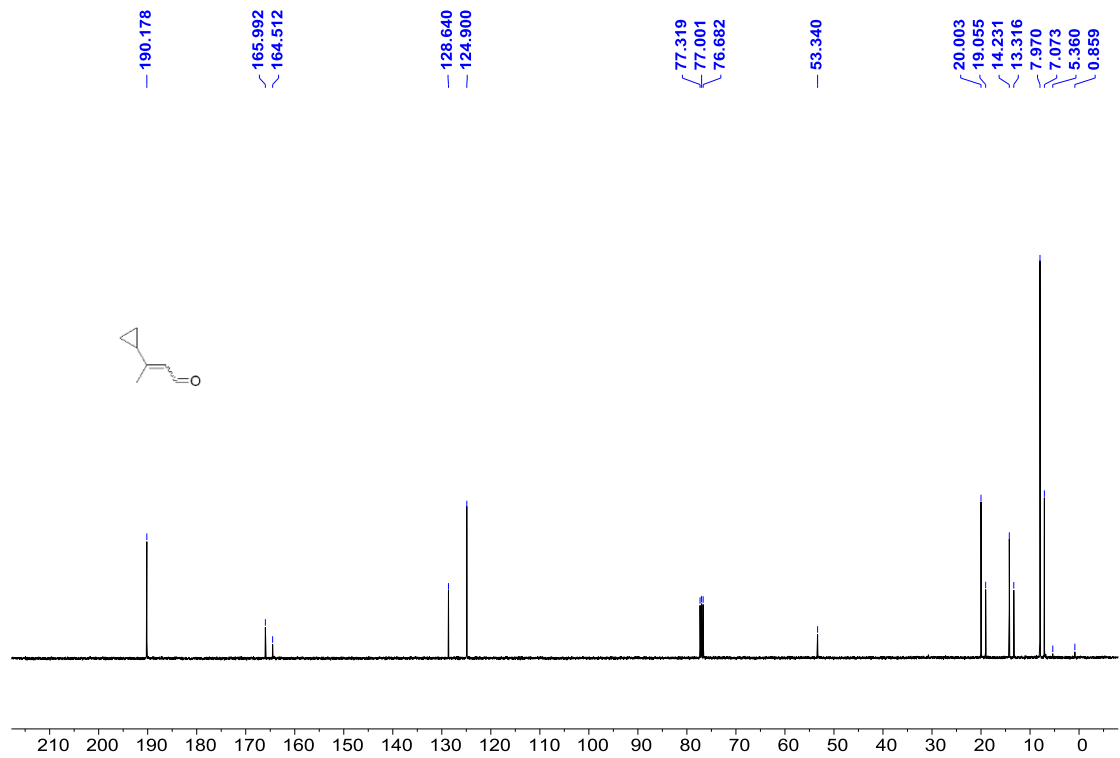

(2-Cyclohexenylidene)acetaldehyde (**2y**)

<sup>1</sup>H NMR (400 MHz, CDCl<sub>3</sub>)

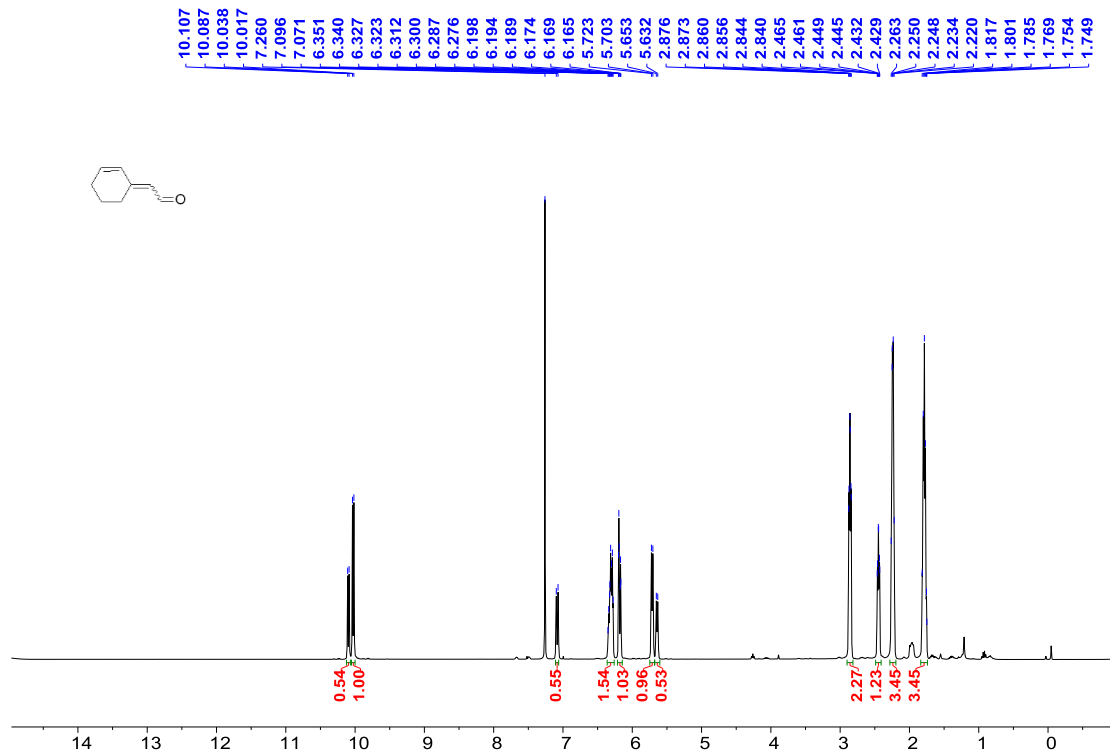

<sup>13</sup>C NMR{<sup>1</sup>H} (101 MHz, CDCl<sub>3</sub>)

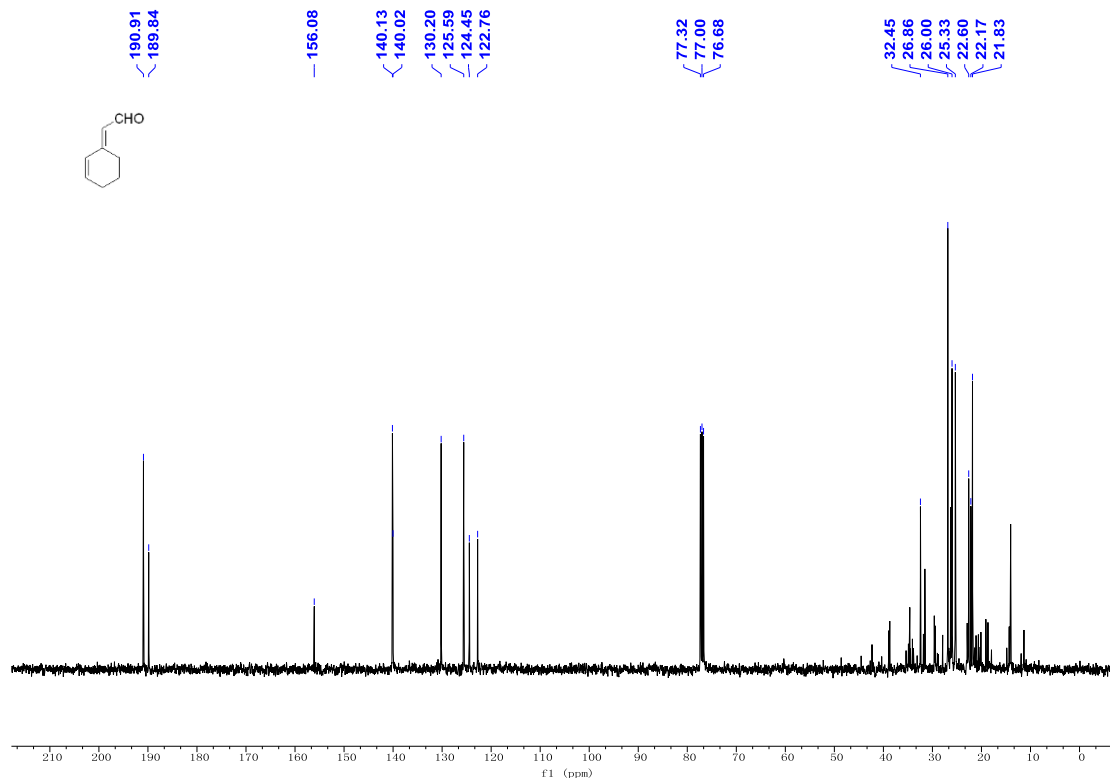

2-((8*S*,9*S*,10*R*,13*S*,14*S*)-10,13-Dimethyl-1,2,7,8,9,10,11,12,13,14,15,16-dodecahydro-17*H*-cyclopenta[*a*]phenanthren-17-ylidene)acetaldehyde (**12**)

<sup>1</sup>H NMR (400 MHz, CDCl<sub>3</sub>)

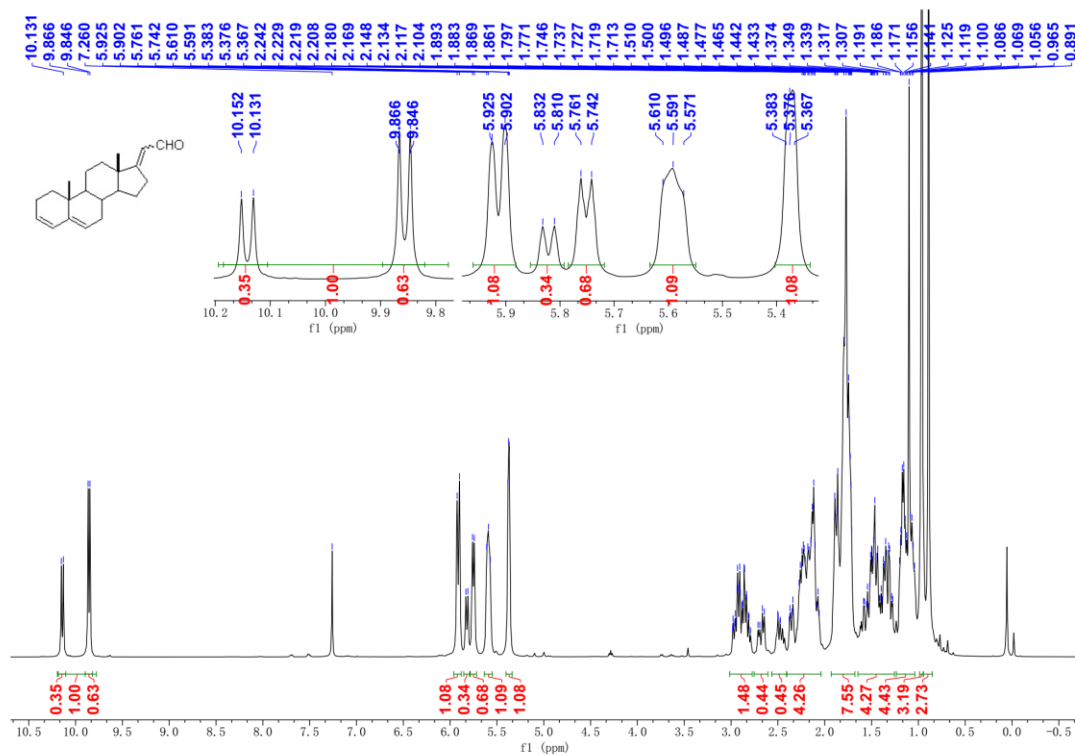

<sup>13</sup>C NMR{<sup>1</sup>H} (101 MHz, CDCl<sub>3</sub>)

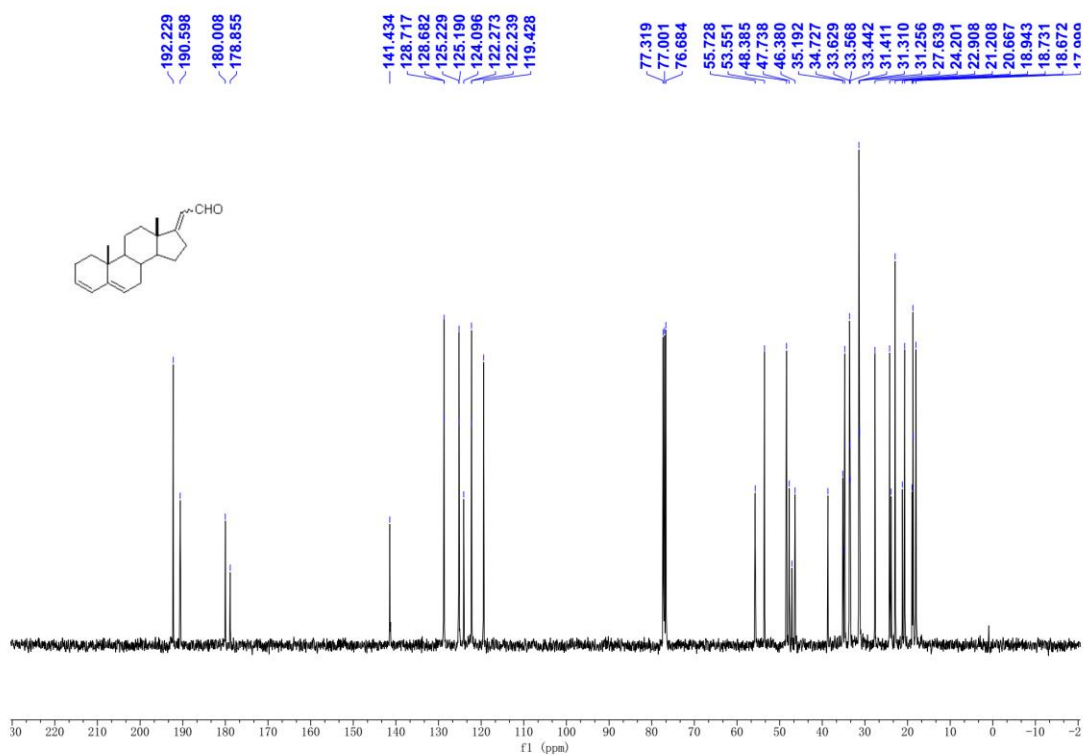

# HRMS

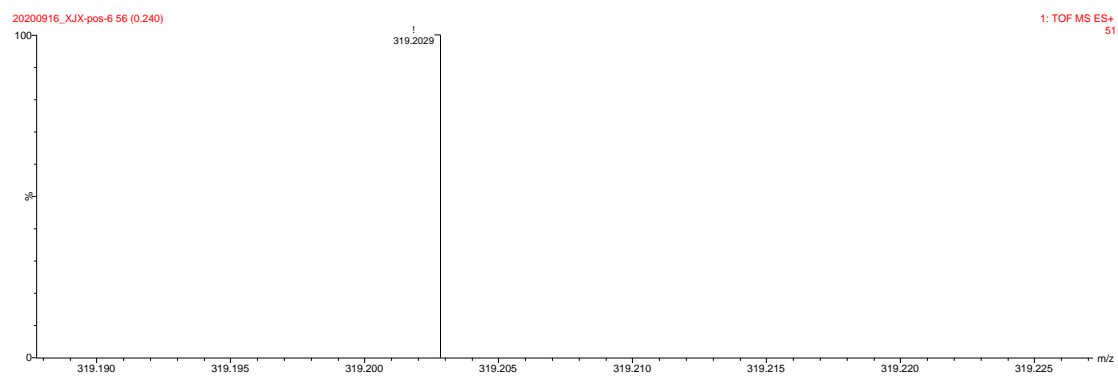

Ethyl 4-oxo-6-phenyl-3,4-dihydro-2H-thiopyran-5-carboxylate (**3ab**)

<sup>1</sup>H NMR (400 MHz, CDCl<sub>3</sub>)

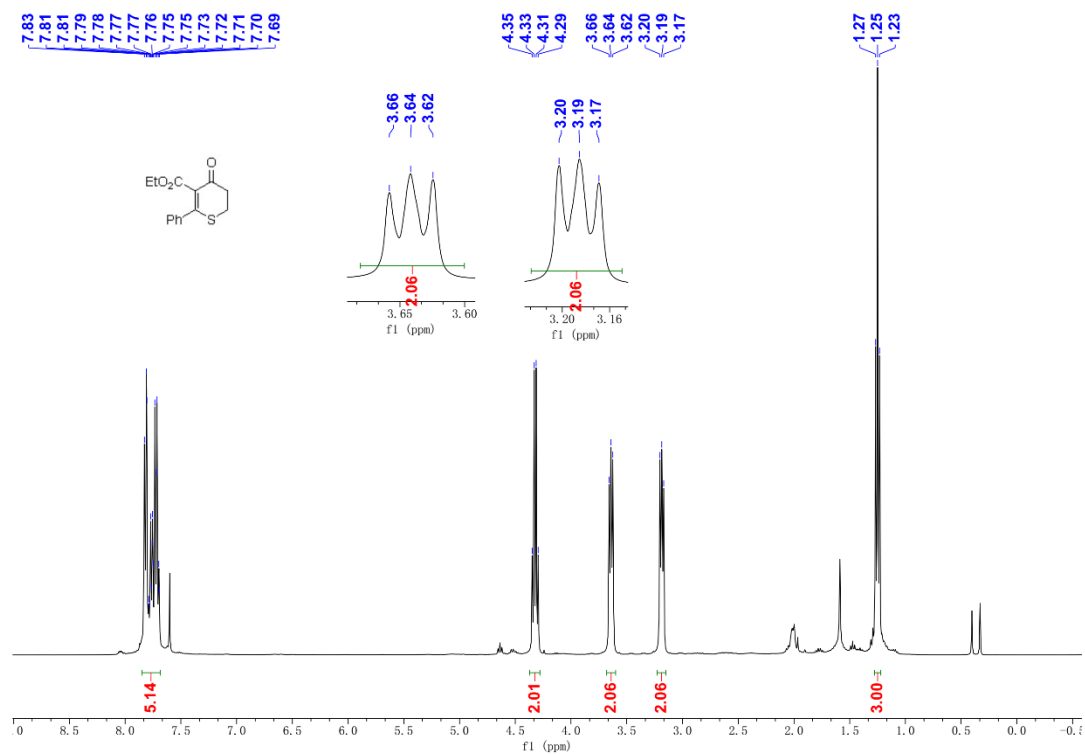

<sup>13</sup>C NMR{<sup>1</sup>H} (101 MHz, CDCl<sub>3</sub>)

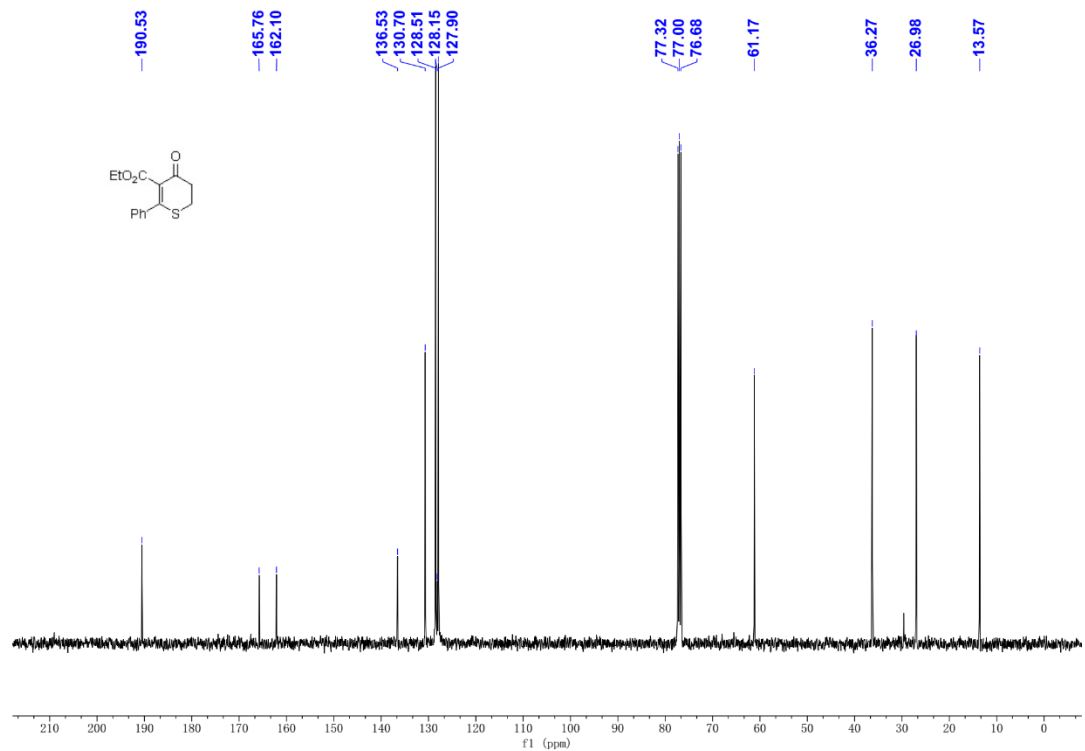



# HRMS

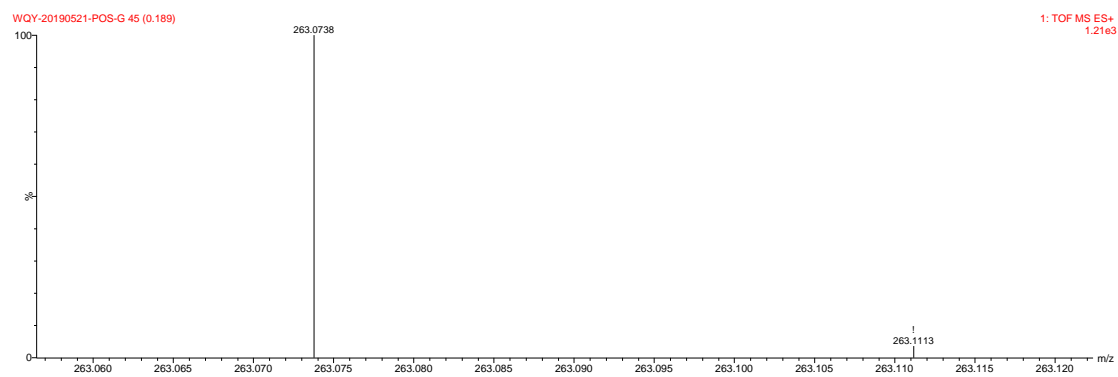

Ethyl 2-(4-(dimethylamino)phenyl)-4-oxo-6-phenyl-3,4-dihydro-2H-thiopyran-5-carboxylate  
(3ac)

<sup>1</sup>H NMR (400 MHz, CDCl<sub>3</sub>)

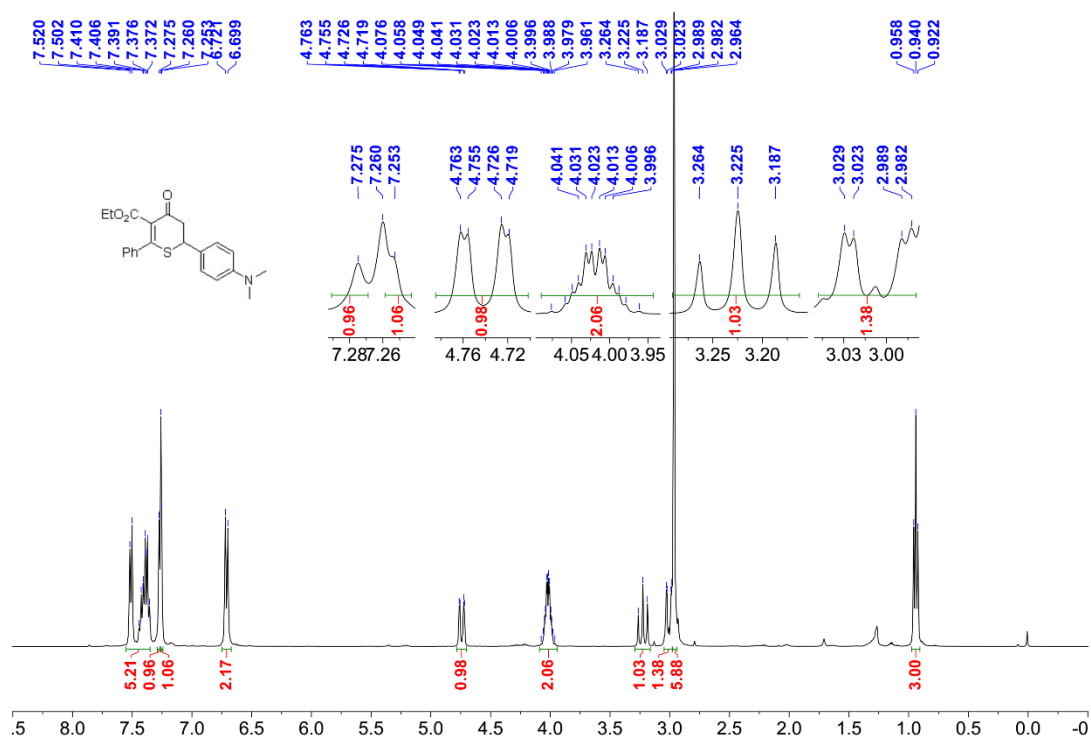

<sup>13</sup>C NMR {<sup>1</sup>H} (101 MHz, CDCl<sub>3</sub>)

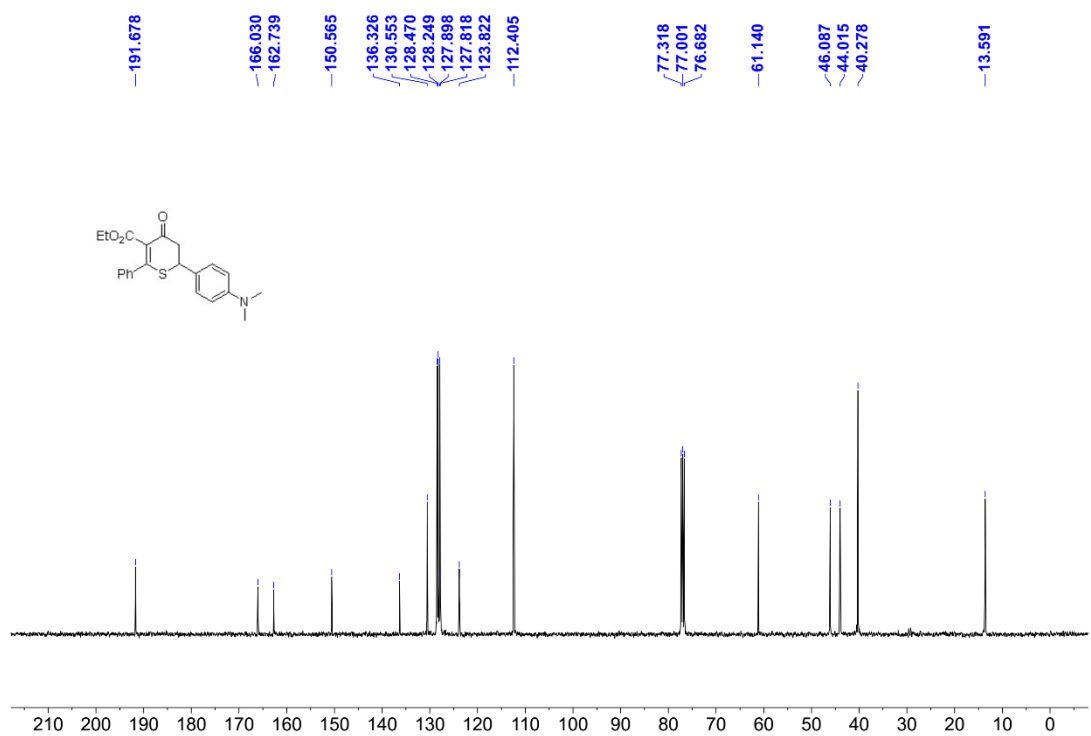

# HRMS

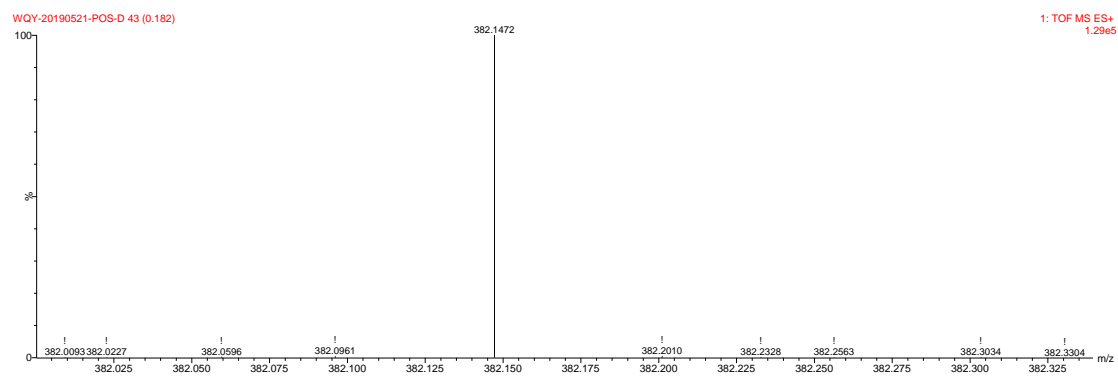

Ethyl 2-(4-methoxyphenyl)-4-oxo-6-phenyl-3,4-dihydro-2H-thiopyran-5-carboxylate (**3ad**)

<sup>1</sup>H NMR (400 MHz, CDCl<sub>3</sub>)

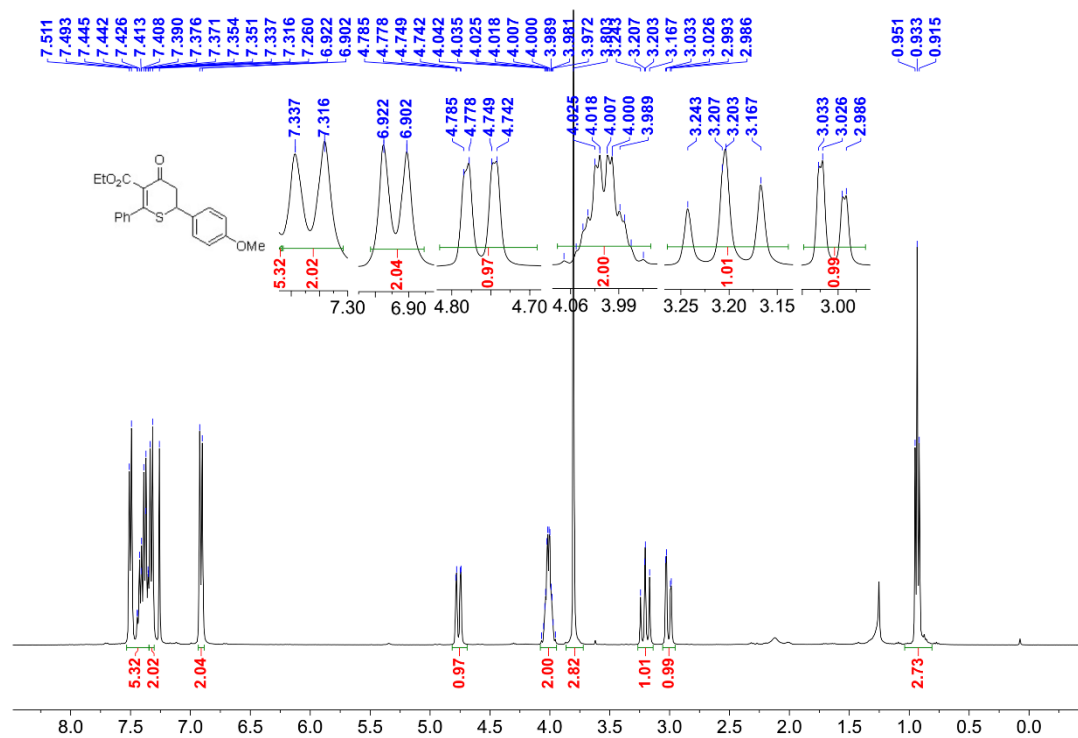

<sup>13</sup>C NMR{<sup>1</sup>H} (101 MHz, CDCl<sub>3</sub>)

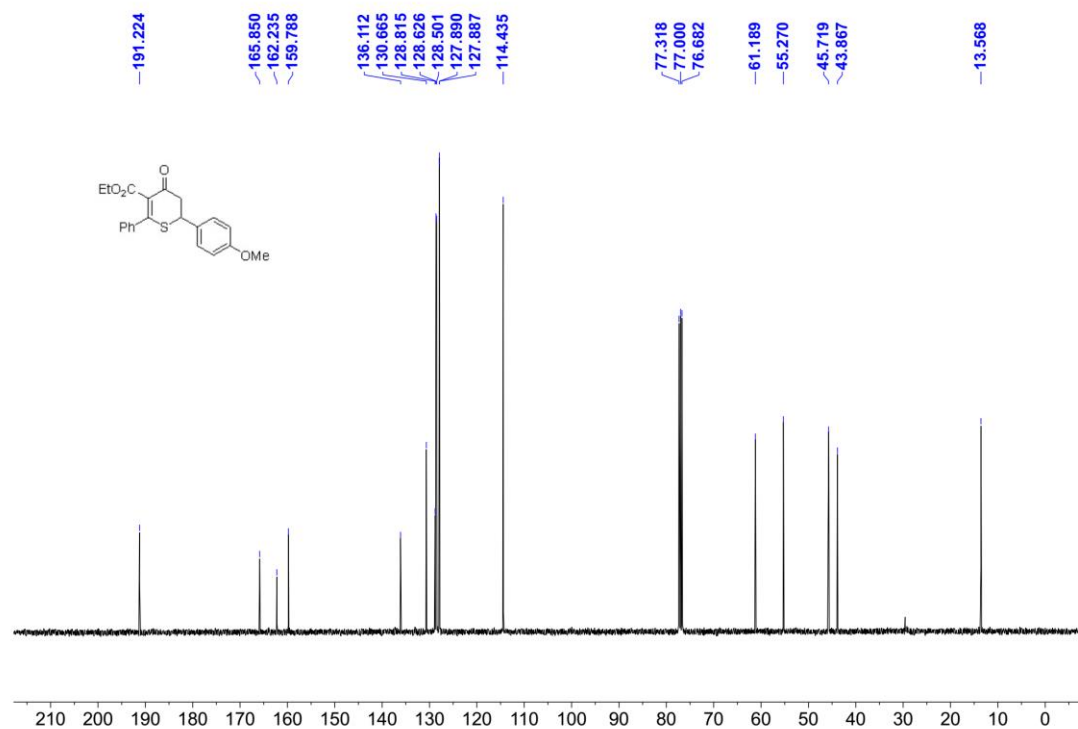

# HRMS

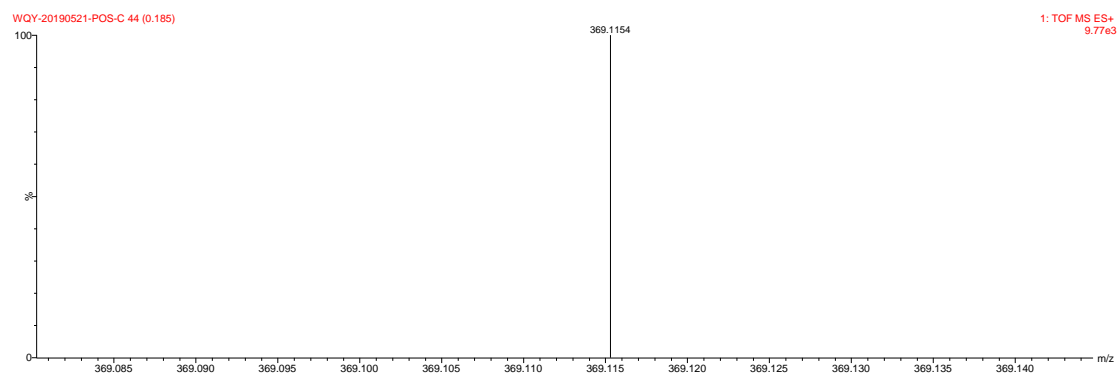

Ethyl 2-(3-methoxyphenyl)-4-oxo-6-phenyl-3,4-dihydro-2H-thiopyran-5-carboxylate (**3ae**)

<sup>1</sup>H NMR (400 MHz, CDCl<sub>3</sub>)

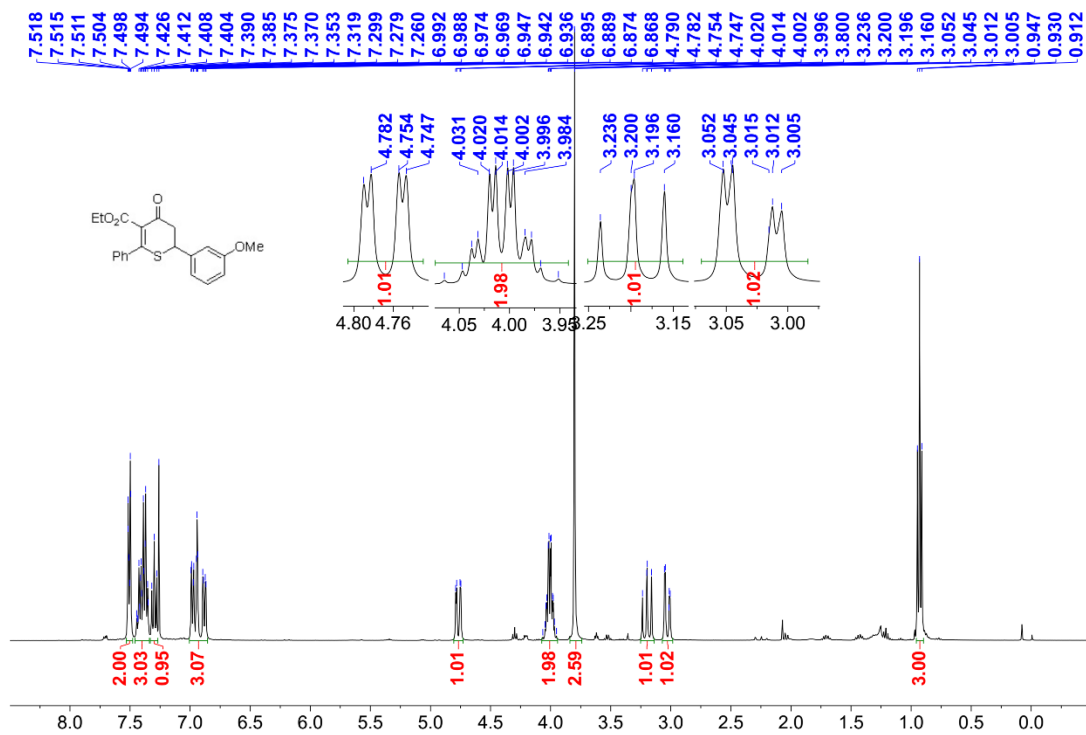

<sup>13</sup>C NMR{<sup>1</sup>H} (101 MHz, CDCl<sub>3</sub>)

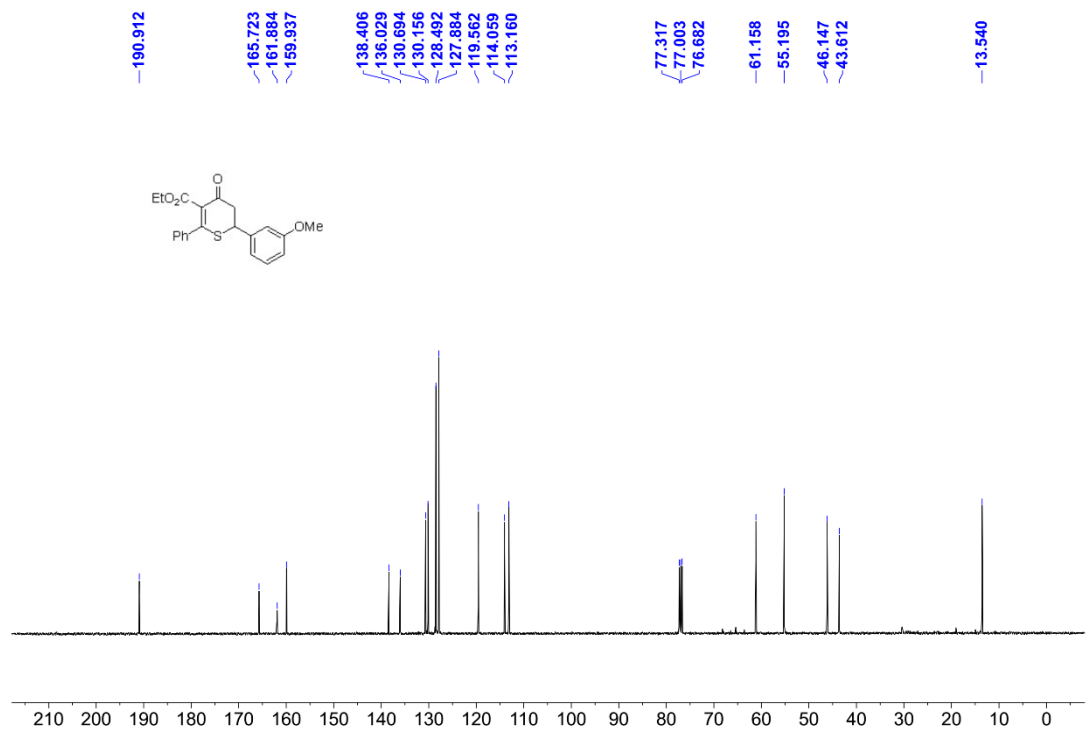

# HRMS

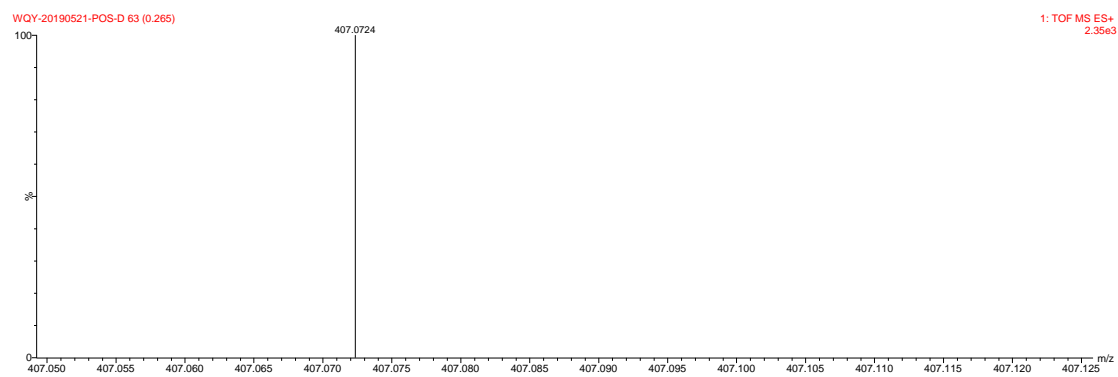

Ethyl 2-(2-methoxyphenyl)-4-oxo-6-phenyl-3,4-dihydro-2H-thiopyran-5-carboxylate (**3af**)

<sup>1</sup>H NMR (400 MHz, CDCl<sub>3</sub>)

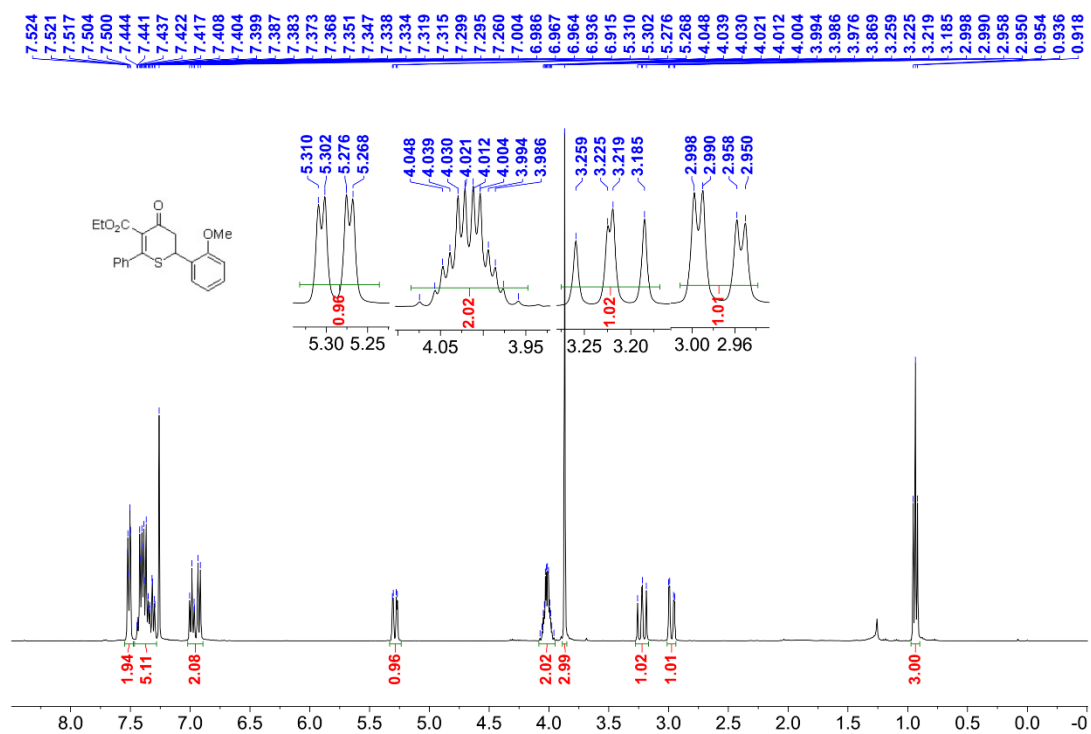



# HRMS

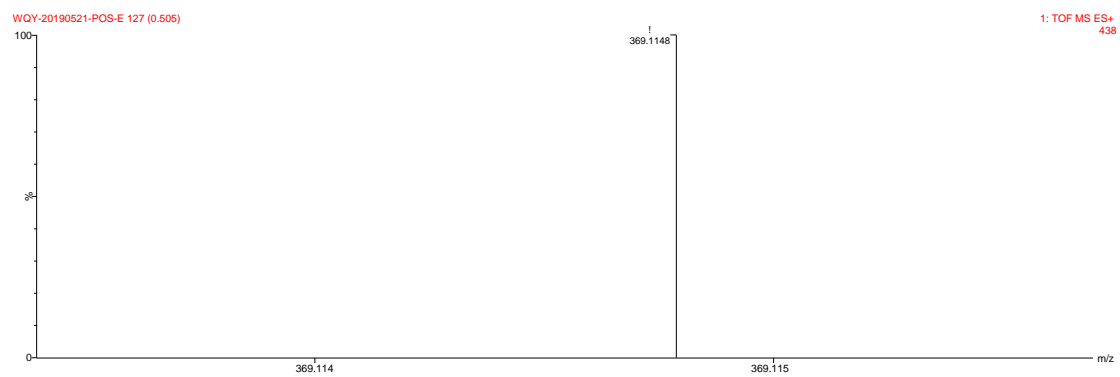

Ethyl 4-oxo-2,6-diphenyl-3,4-dihydro-2H-thiopyran-5-carboxylate (**3ag-d/h**)

<sup>1</sup>H NMR (400 MHz, CDCl<sub>3</sub>)

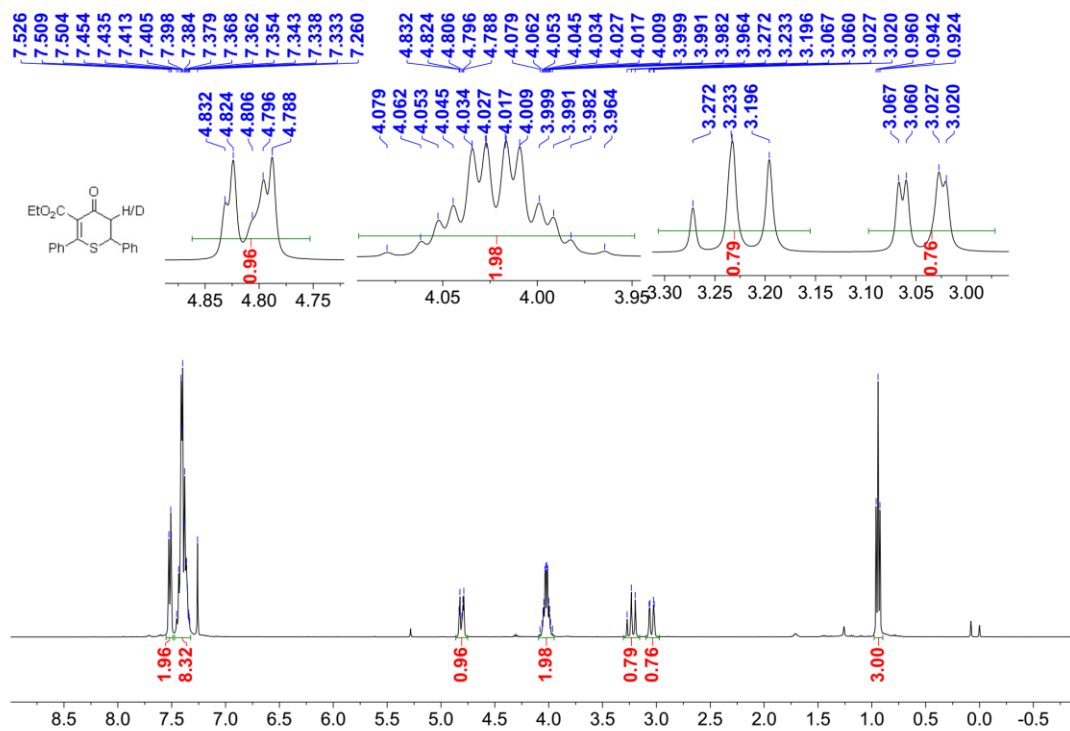

<sup>13</sup>C NMR{<sup>1</sup>H} (101 MHz, CDCl<sub>3</sub>)

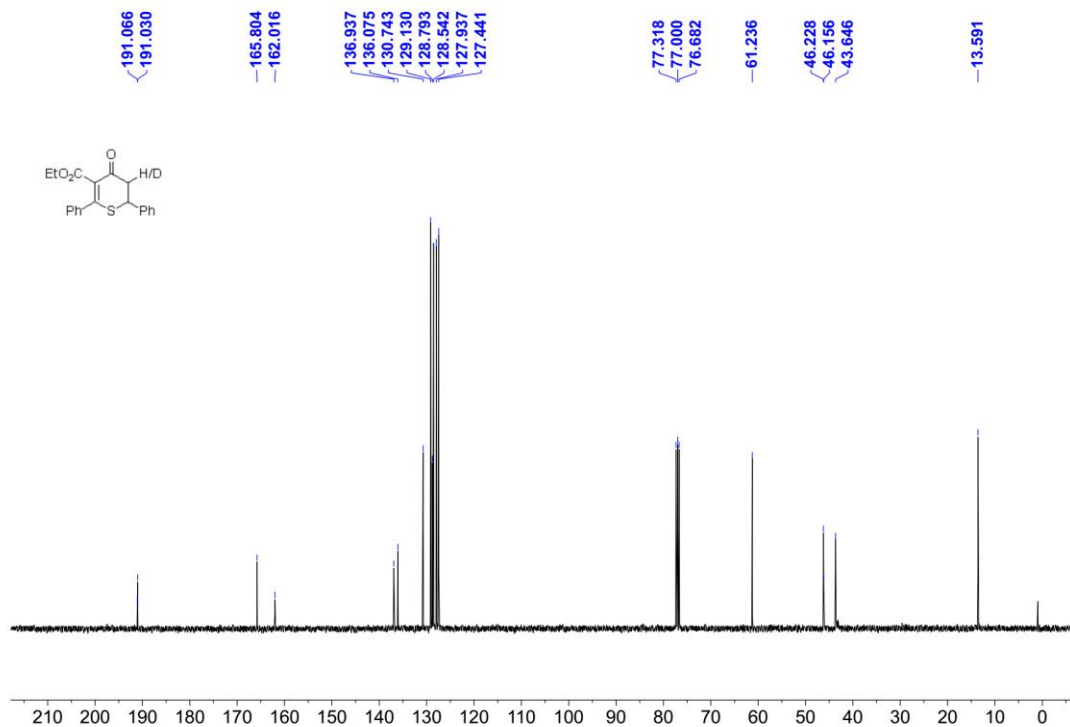

# HRMS

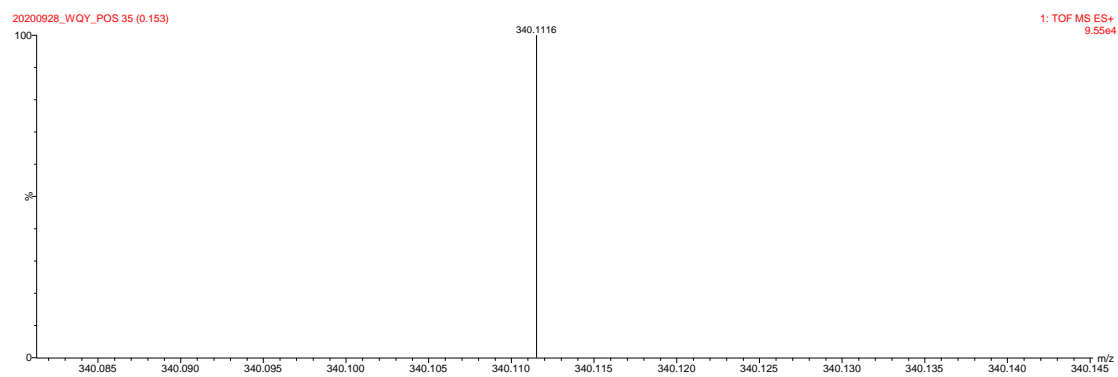

Ethyl 2-(4-fluorophenyl)-4-oxo-6-phenyl-3,4-dihydro-2H-thiopyran-5-carboxylate (**3ah**)

<sup>1</sup>H NMR (400 MHz, CDCl<sub>3</sub>)

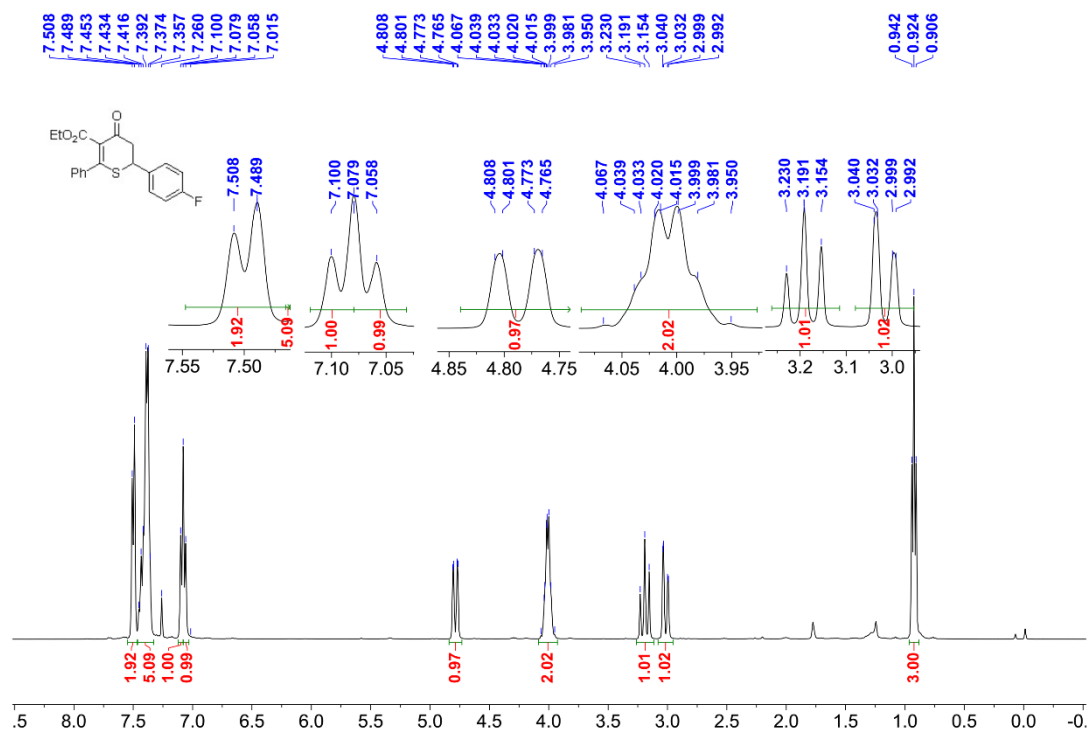

<sup>13</sup>C NMR{<sup>1</sup>H} (101 MHz, CDCl<sub>3</sub>)

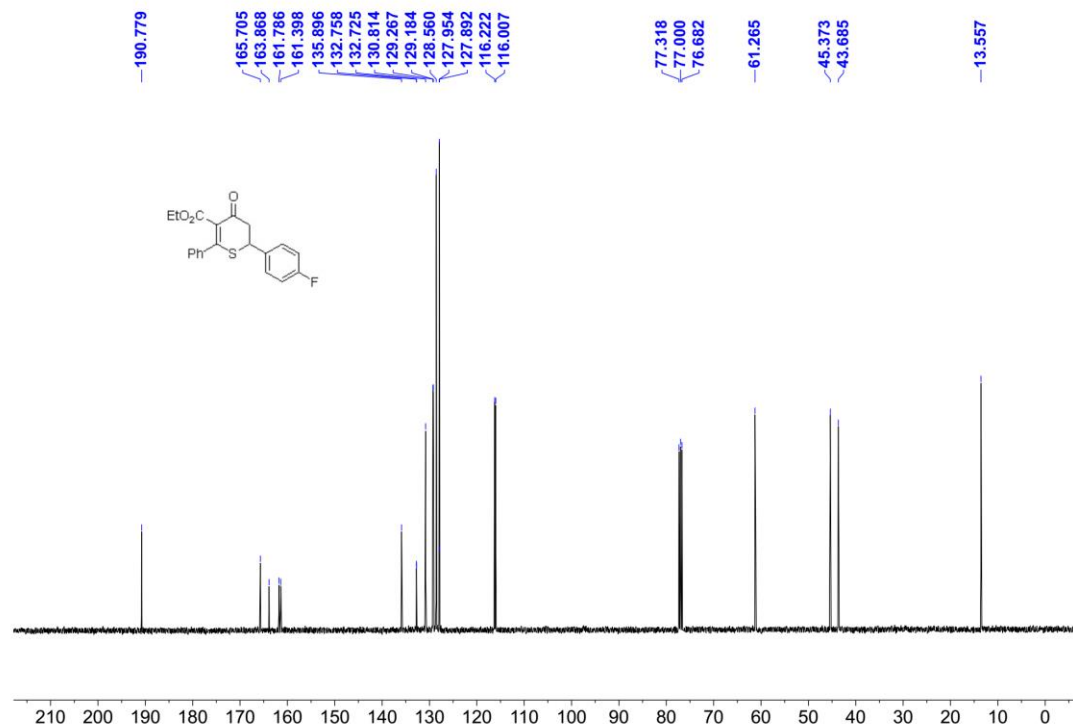

**$^{19}\text{F}$  NMR{ $^1\text{H}$  } (376 MHz,  $\text{CDCl}_3$ )**

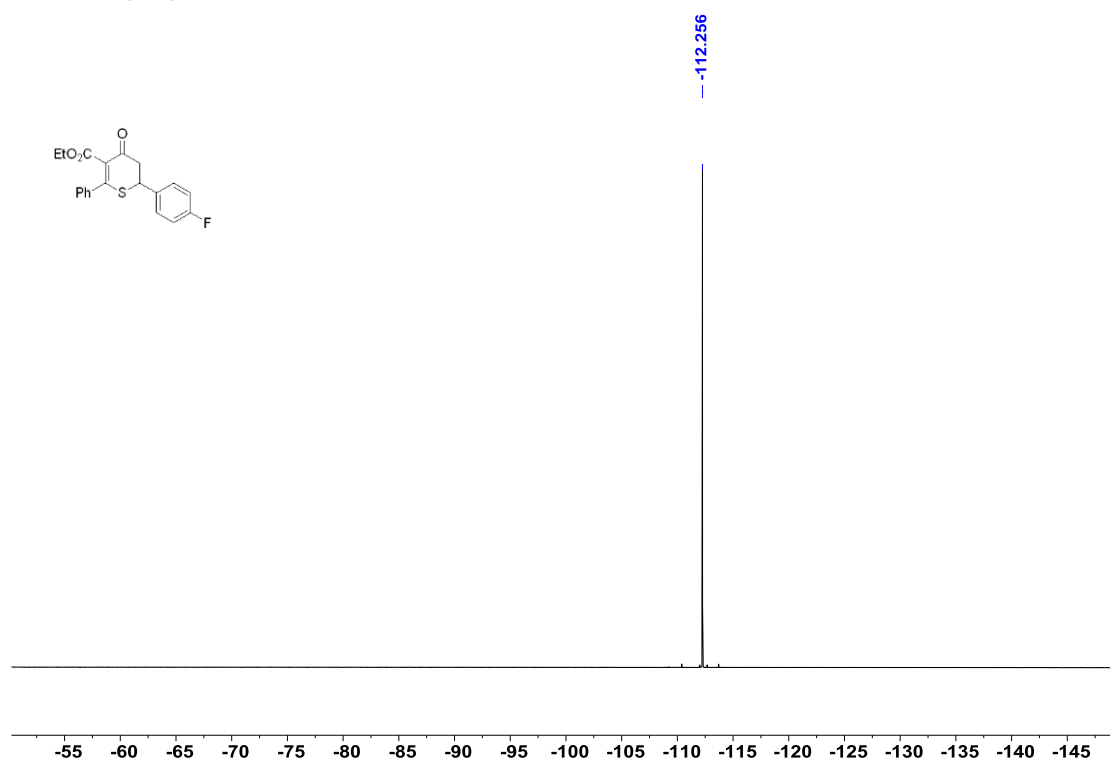

**HRMS**

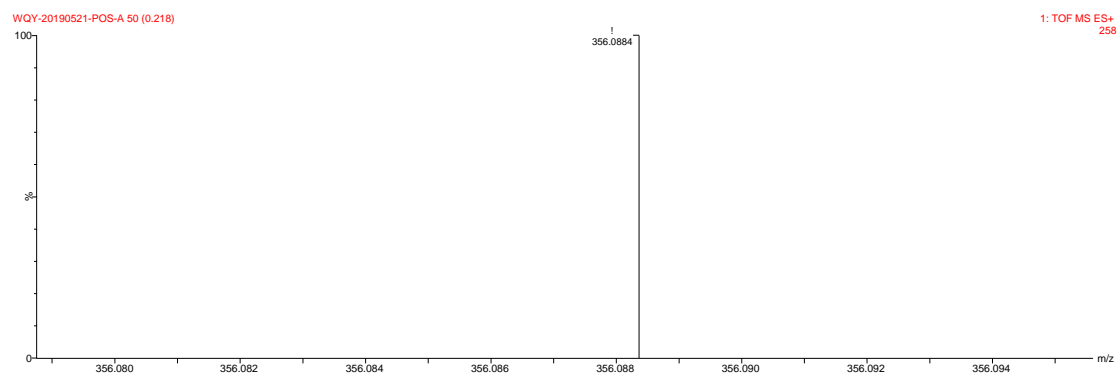

Ethyl 2-(4-bromophenyl)-4-oxo-6-phenyl-3,4-dihydro-2H-thiopyran-5-carboxylate (**3ai**)

<sup>1</sup>H NMR (400 MHz, CDCl<sub>3</sub>)

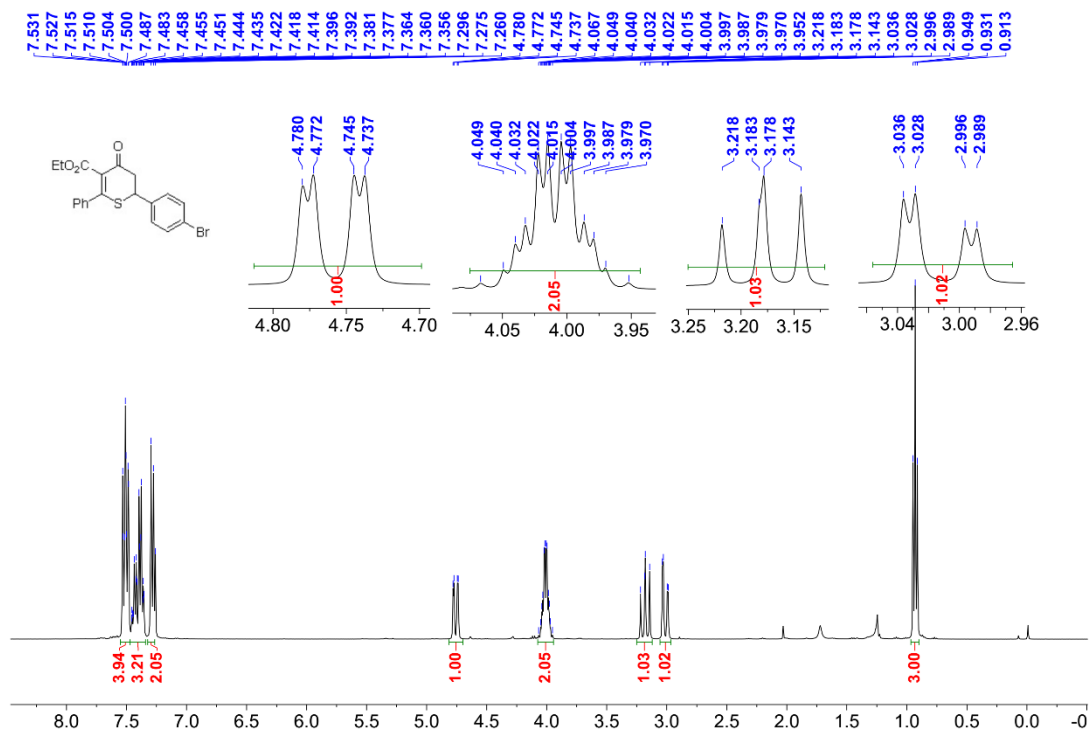

<sup>13</sup>C NMR{<sup>1</sup>H} (101 MHz, CDCl<sub>3</sub>)

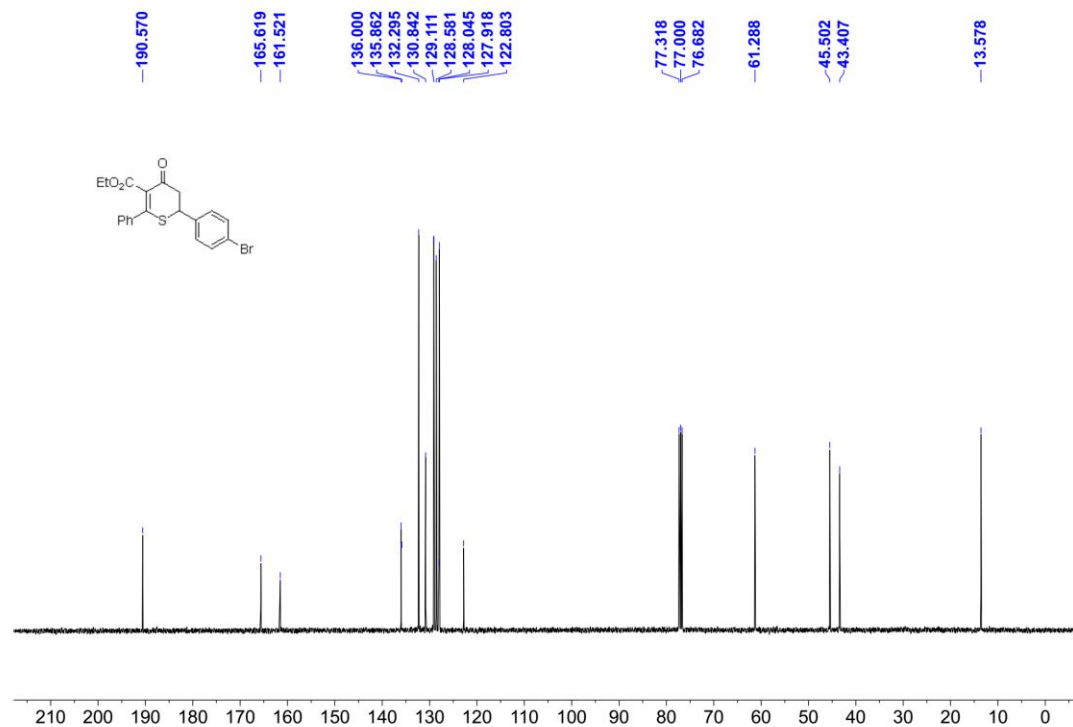

# HRMS

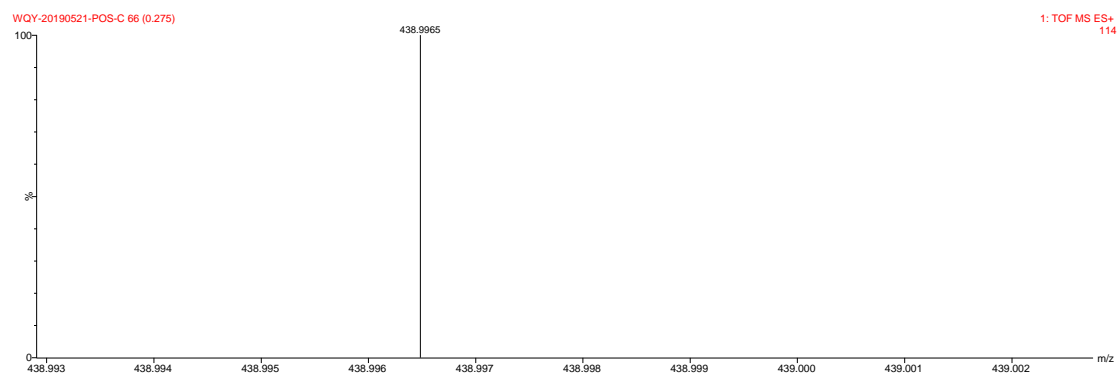

Ethyl 2-(2,3-dichlorophenyl)-4-oxo-6-phenyl-3,4-dihydro-2H-thiopyran-5-carboxylate (**3aj**)

<sup>1</sup>H NMR (400 MHz, CDCl<sub>3</sub>)

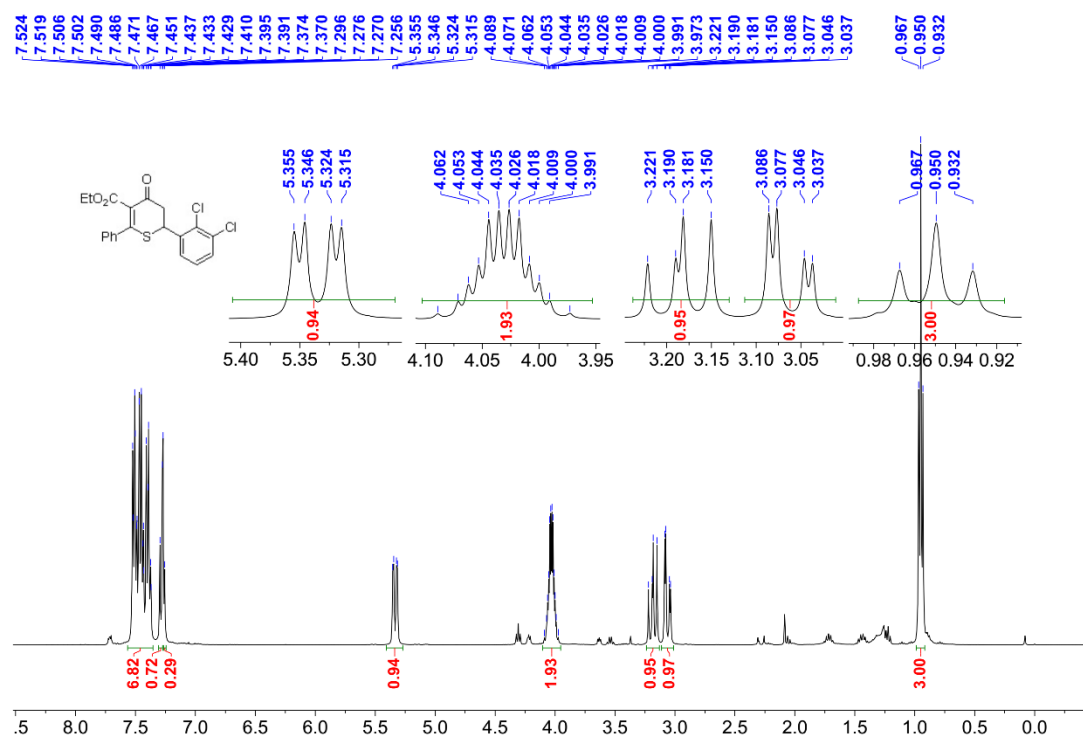

<sup>13</sup>C NMR{<sup>1</sup>H} (101 MHz, CDCl<sub>3</sub>)

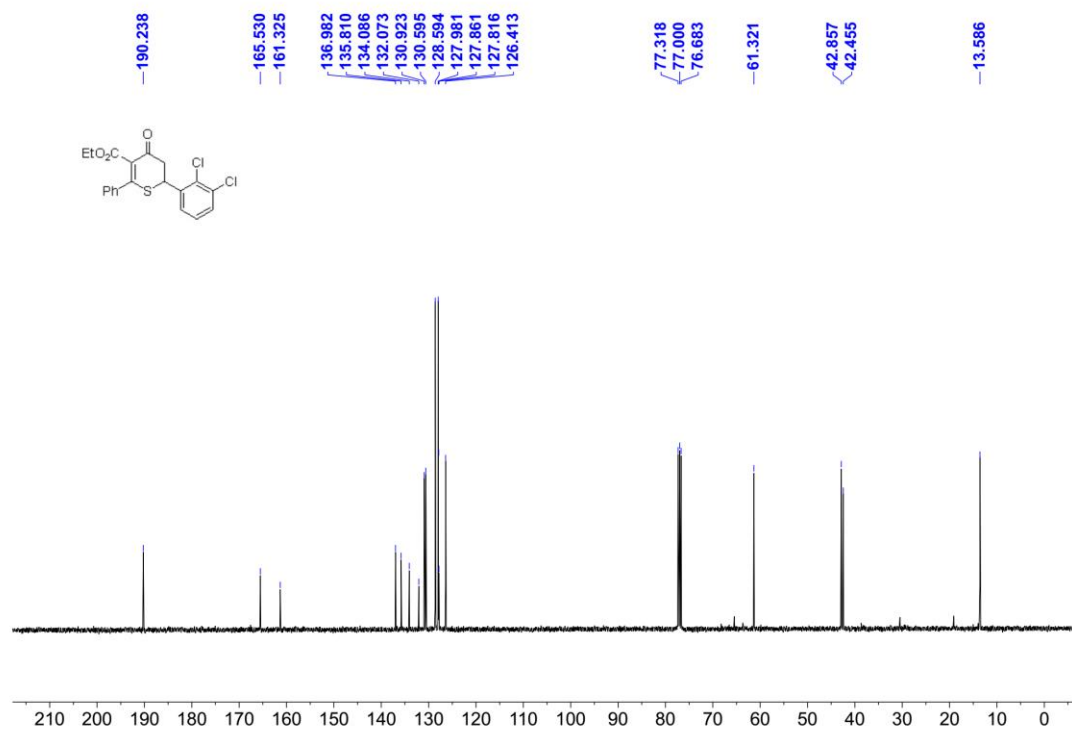



# HRMS

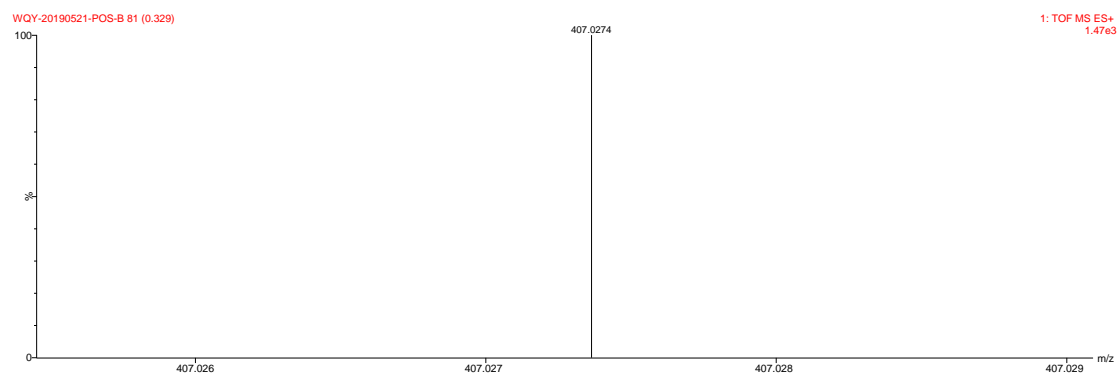

Ethyl 2-(4-nitrophenyl)-4-oxo-6-phenyl-3,4-dihydro-2H-thiopyran-5-carboxylate (**3ak**)

<sup>1</sup>H NMR (400 MHz, CDCl<sub>3</sub>)

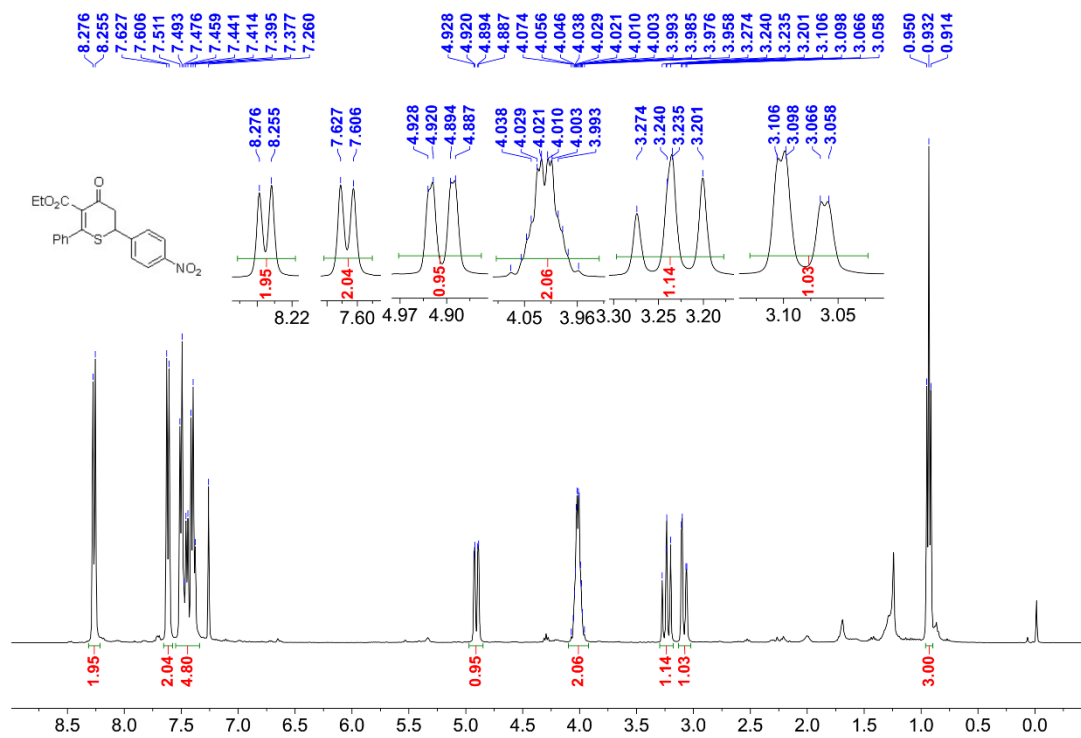

<sup>13</sup>C NMR{<sup>1</sup>H} (101 MHz, CDCl<sub>3</sub>)

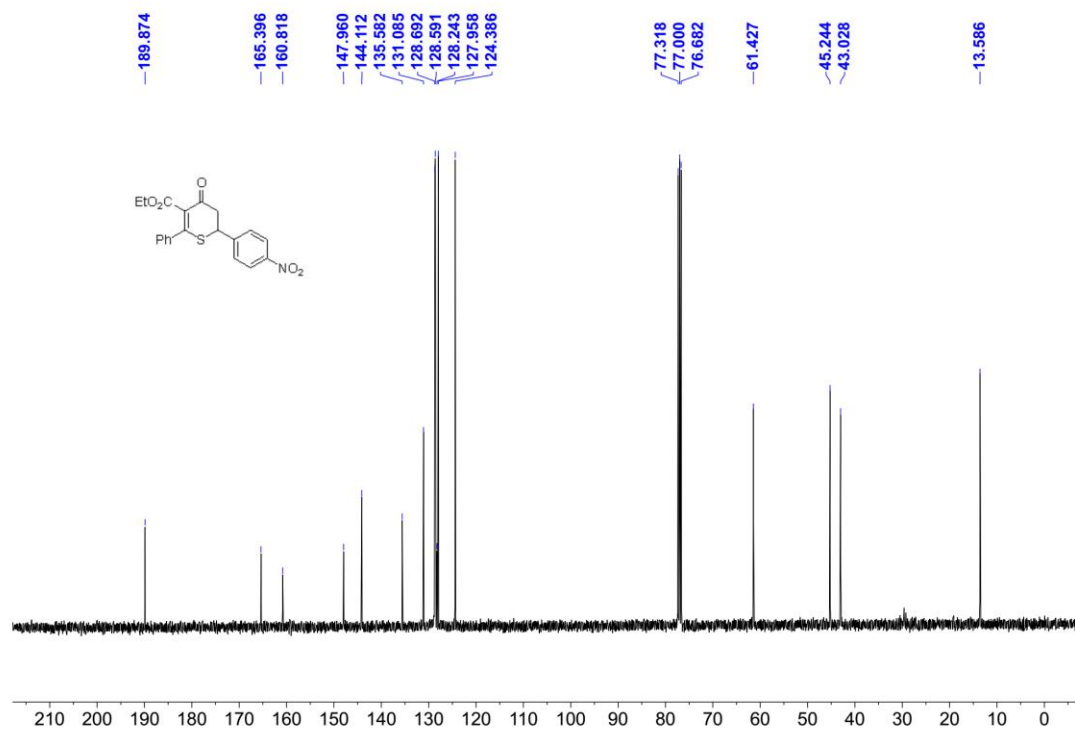

# HRMS

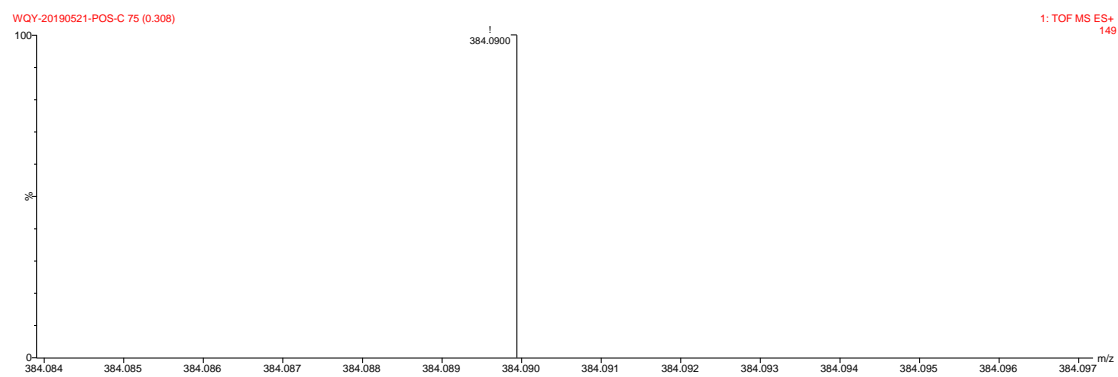

Ethyl 2-(naphthalen-2-yl)-4-oxo-6-phenyl-3,4-dihydro-2H-thiopyran-5-carboxylate (**3aI**)

<sup>1</sup>H NMR (400 MHz, CDCl<sub>3</sub>)

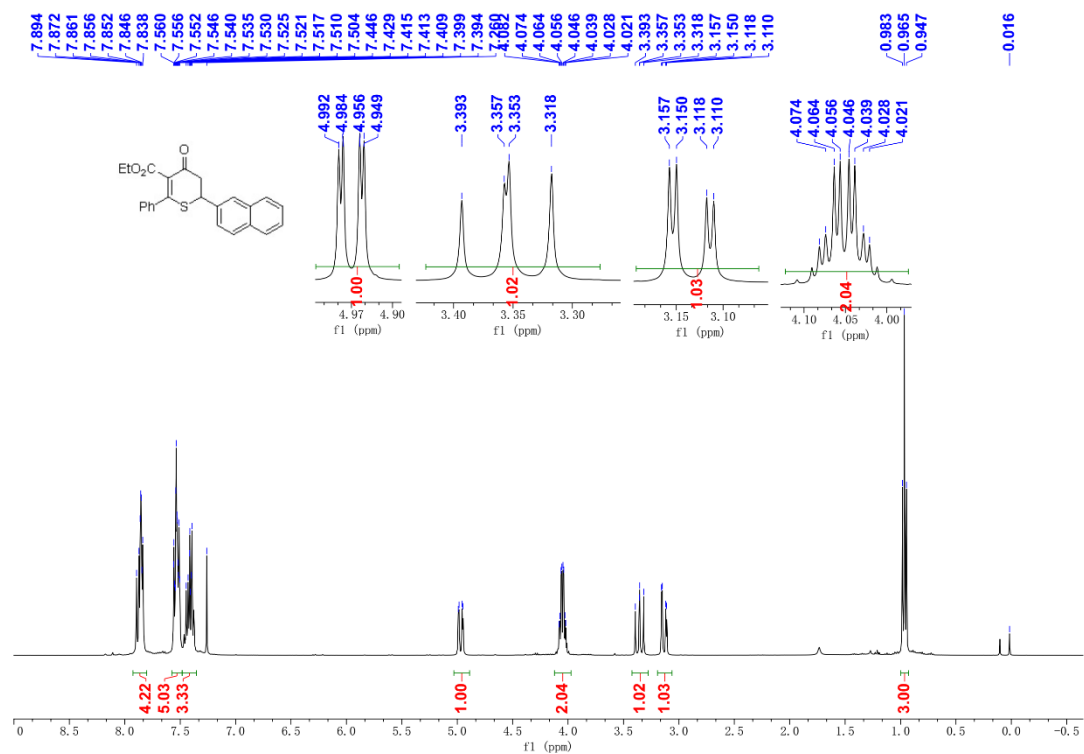

<sup>13</sup>C NMR{<sup>1</sup>H} (101 MHz, CDCl<sub>3</sub>)

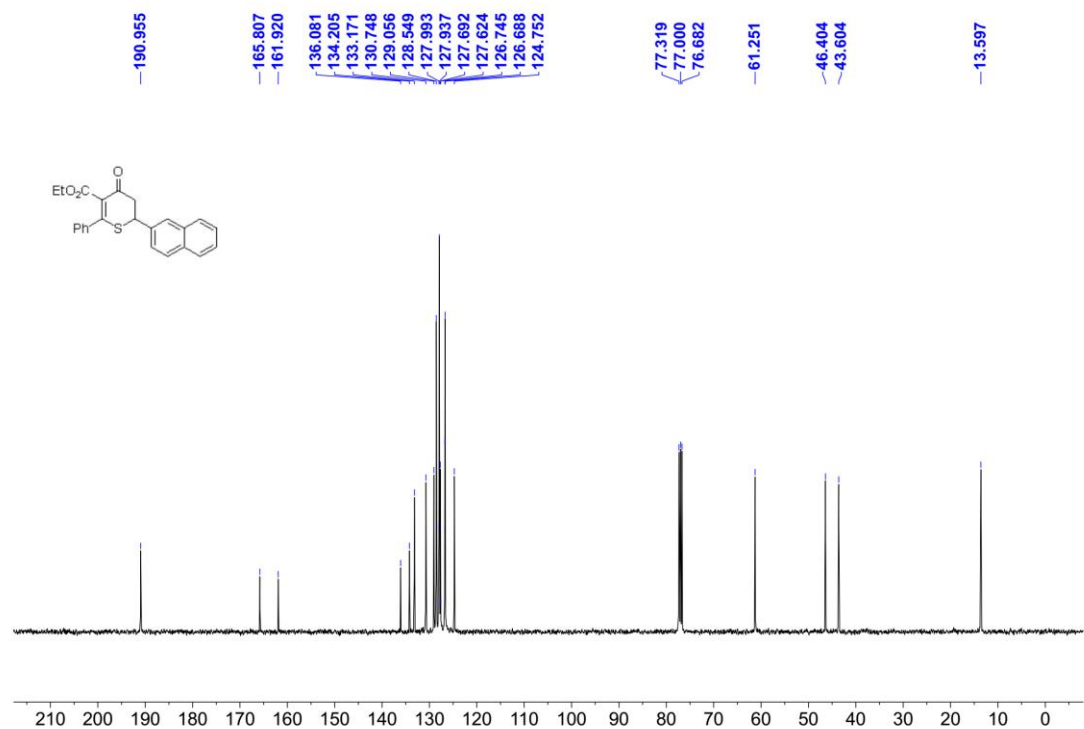

# HRMS

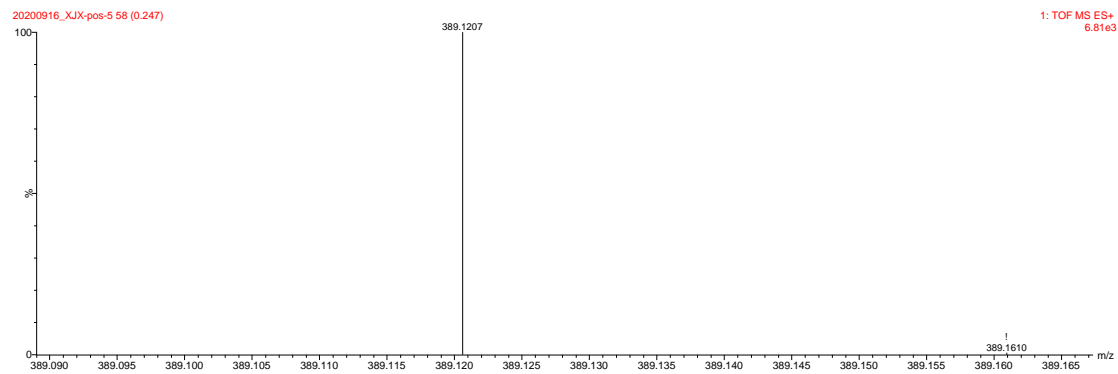

Ethyl (*E*)-4-oxo-6-phenyl-2-styryl-3,4-dihydro-2*H*-thiopyran-5-carboxylate (**3am**)

<sup>1</sup>H NMR (400 MHz, CDCl<sub>3</sub>)

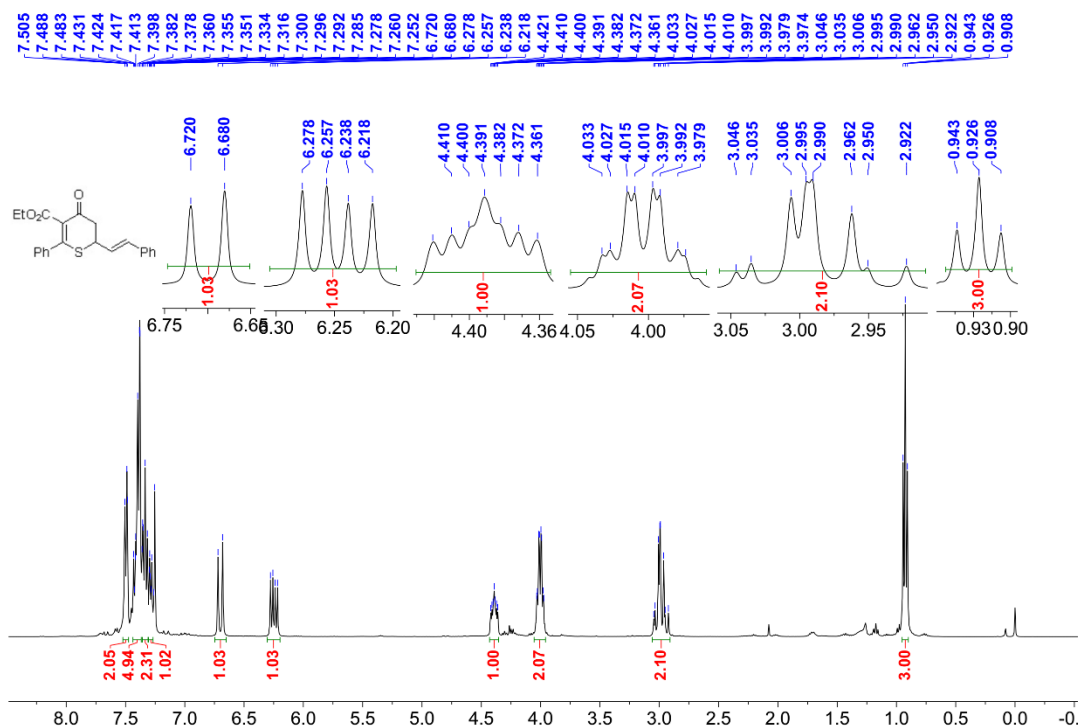

<sup>13</sup>C NMR{<sup>1</sup>H} (101 MHz, CDCl<sub>3</sub>)

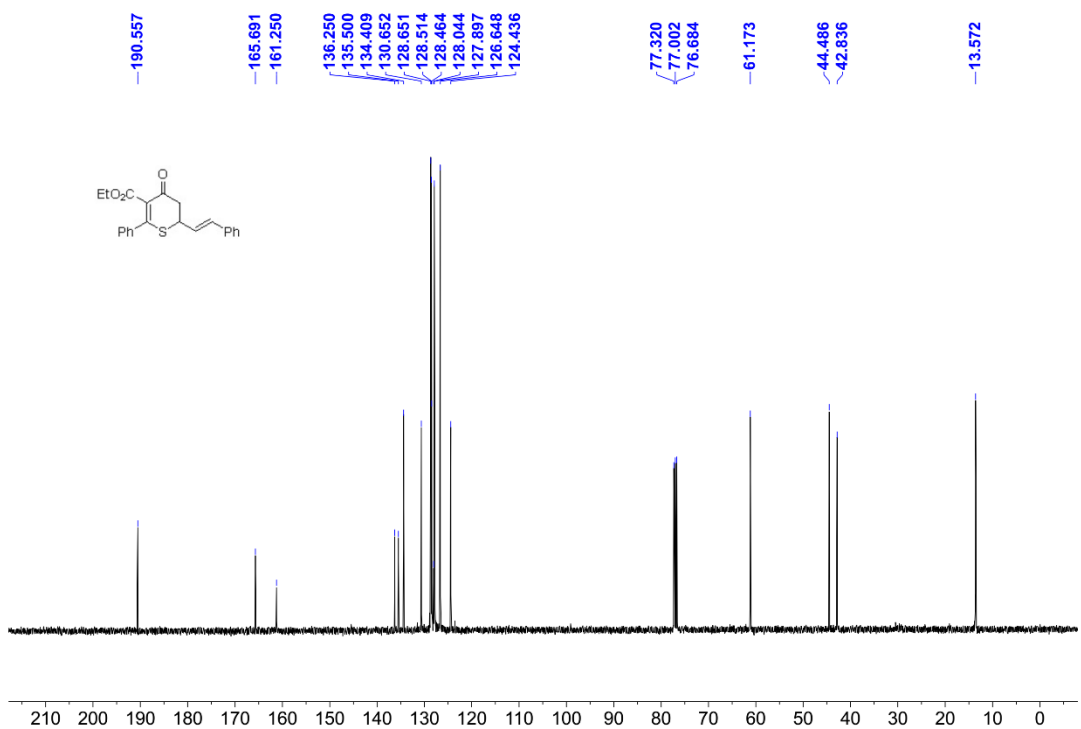

# HRMS

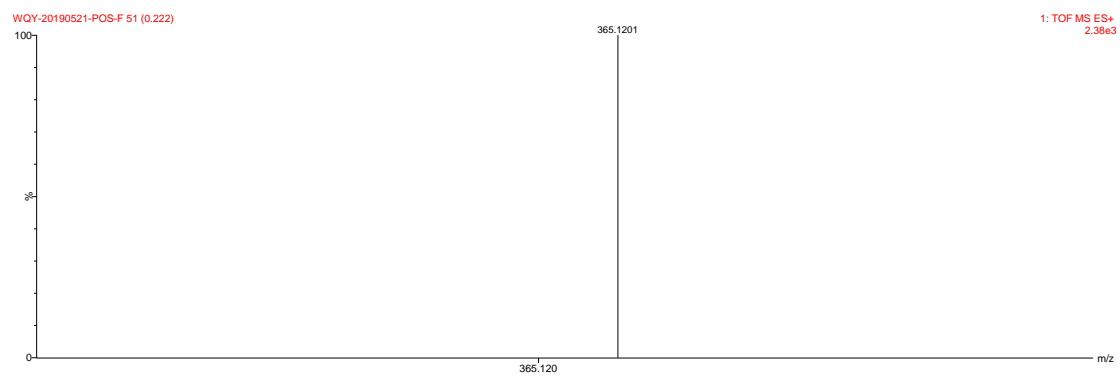

Ethyl 2-((1*R*,5*R*)-6,6-dimethylbicyclo[3.1.1]hept-2-en-2-yl)-4-oxo-6-phenyl-3,4-dihydro-2*H*-thiopyran-5-carboxylate (**3an**)

<sup>1</sup>H NMR (400 MHz, CDCl<sub>3</sub>)

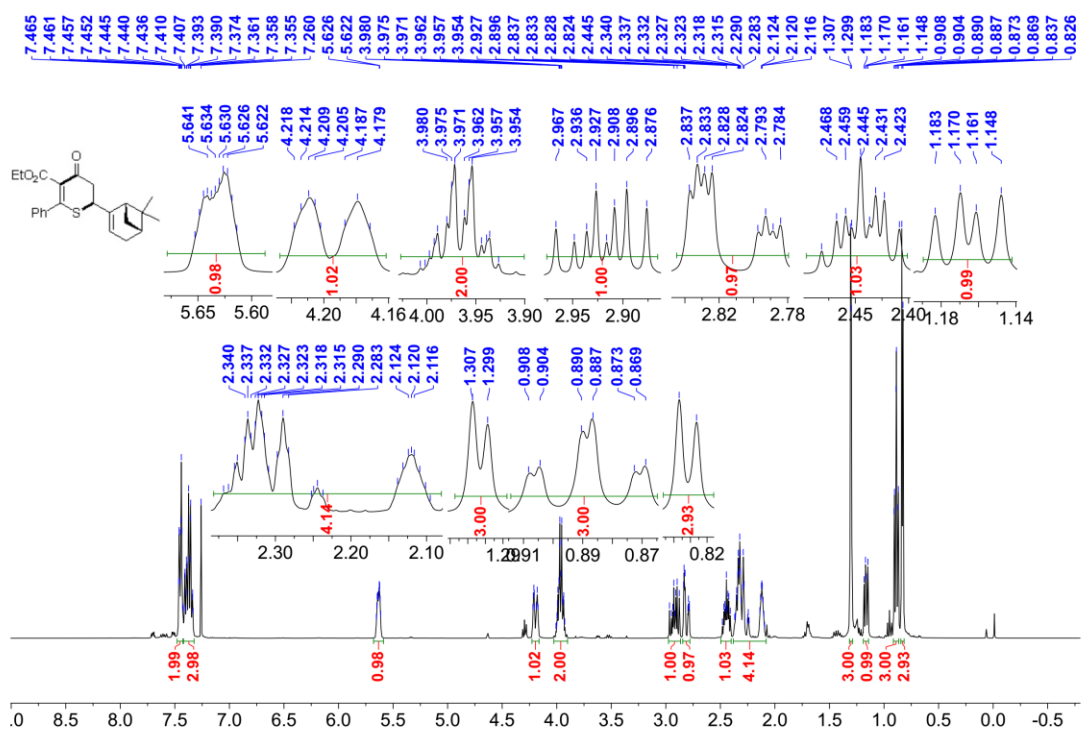

<sup>13</sup>C NMR{<sup>1</sup>H} (101 MHz, CDCl<sub>3</sub>)

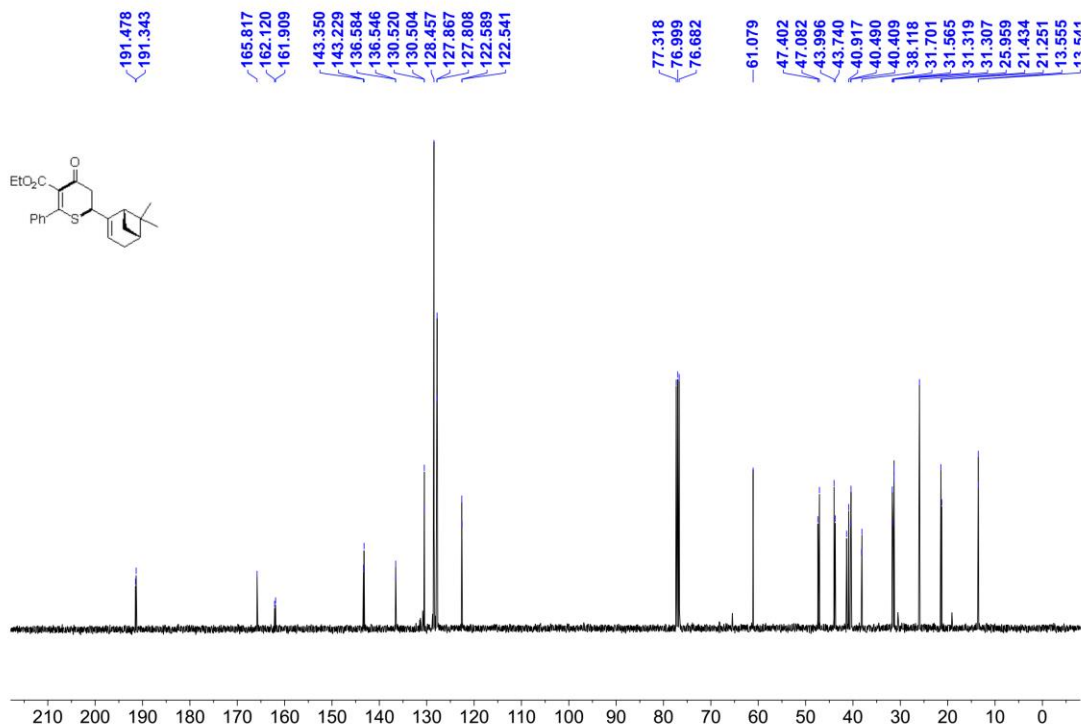



# HRMS

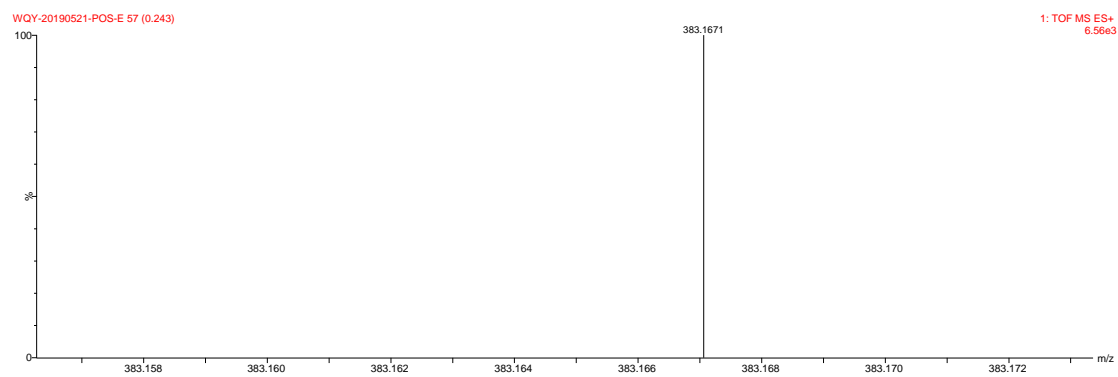

Ethyl 2-cyclohexyl-4-oxo-6-phenyl-3,4-dihydro-2H-thiopyran-5-carboxylate (**3ao**)

<sup>1</sup>H MNR (400 MHz, CDCl<sub>3</sub>)

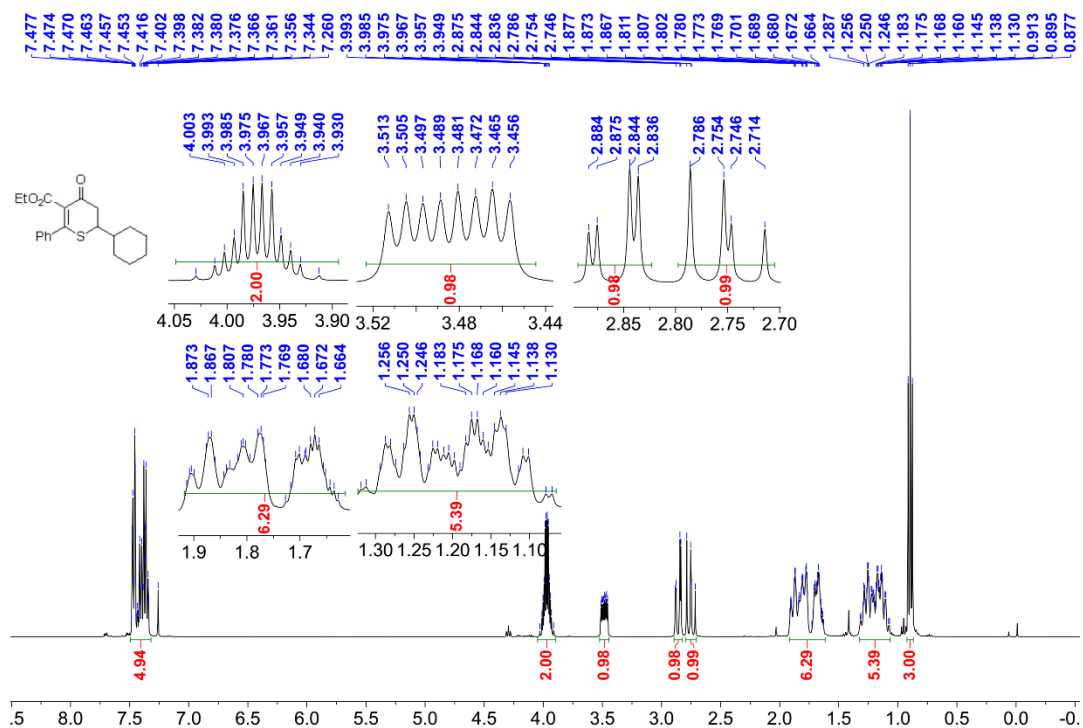

<sup>13</sup>C NMR{<sup>1</sup>H} (101 MHz, CDCl<sub>3</sub>)

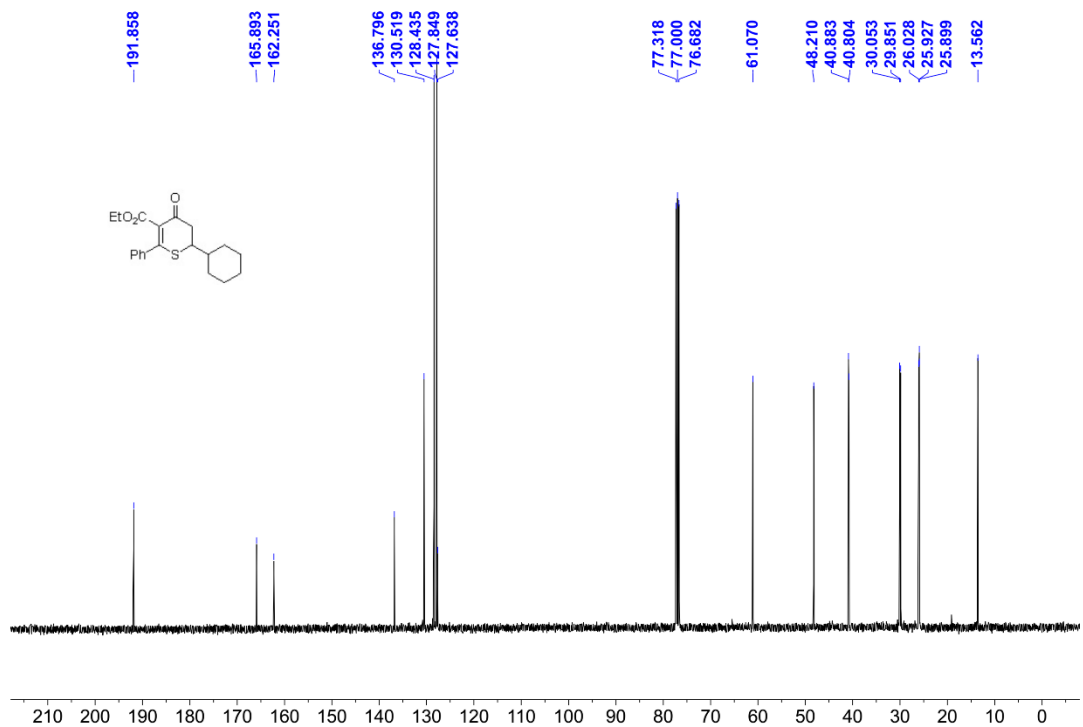

# HRMS

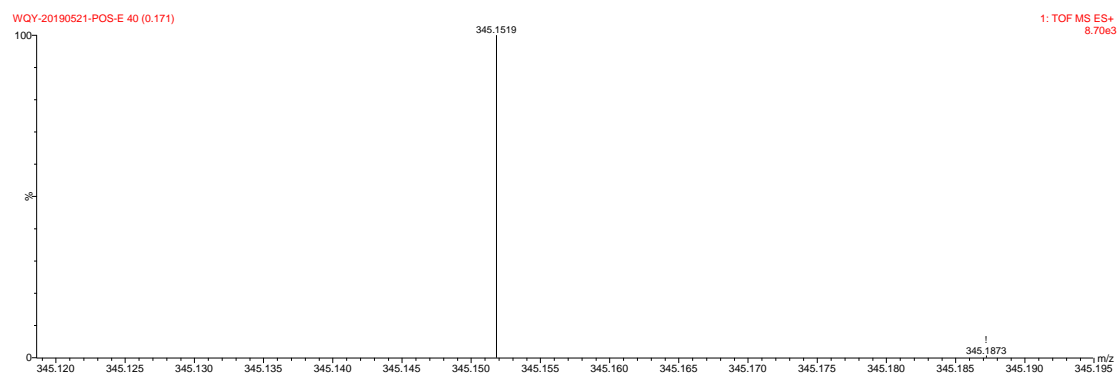

Ethyl 4-oxo-6-phenyl-2-(1-phenylethyl)-3,4-dihydro-2H-thiopyran-5-carboxylate (**3ap**)

<sup>1</sup>H NMR (400 MHz, CDCl<sub>3</sub>)

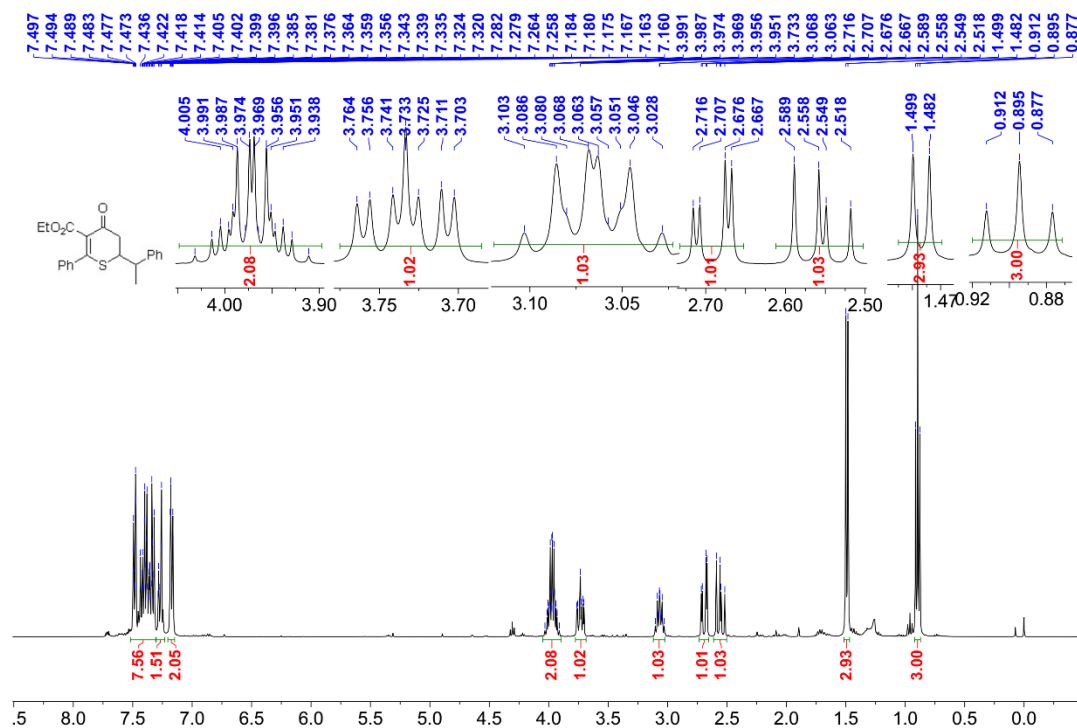

<sup>13</sup>C NMR{<sup>1</sup>H} (101 MHz, CDCl<sub>3</sub>)

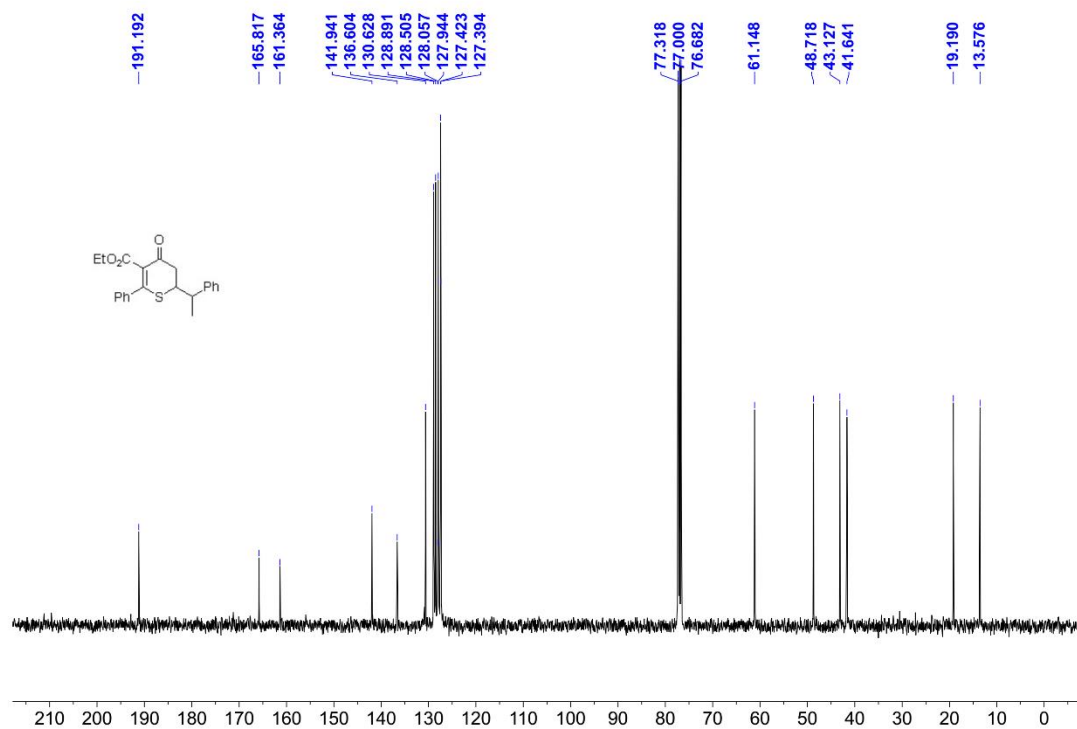

# HRMS

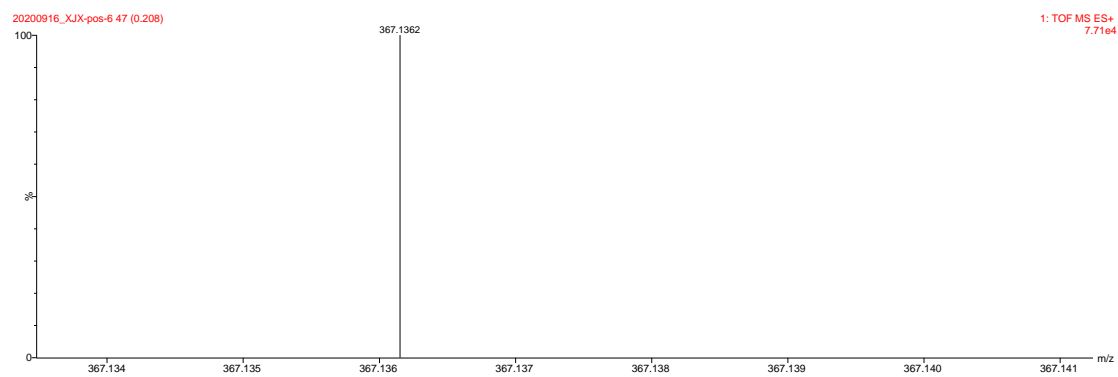

Ethyl 4-oxo-6-phenyl-2-(1-phenylethyl)-3,4-dihydro-2H-thiopyran-5-carboxylate **3ap** (*dr* = 1:1)

<sup>1</sup>H NMR (400 MHz, CDCl<sub>3</sub>)

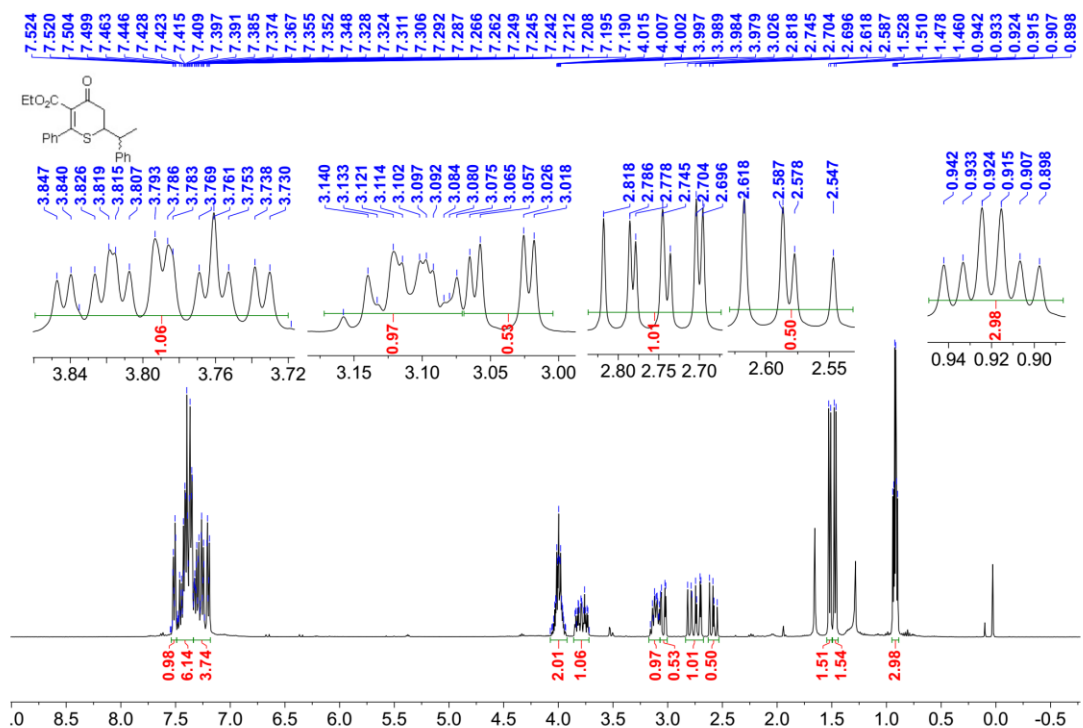

<sup>13</sup>C NMR{<sup>1</sup>H} (101 MHz, CDCl<sub>3</sub>)

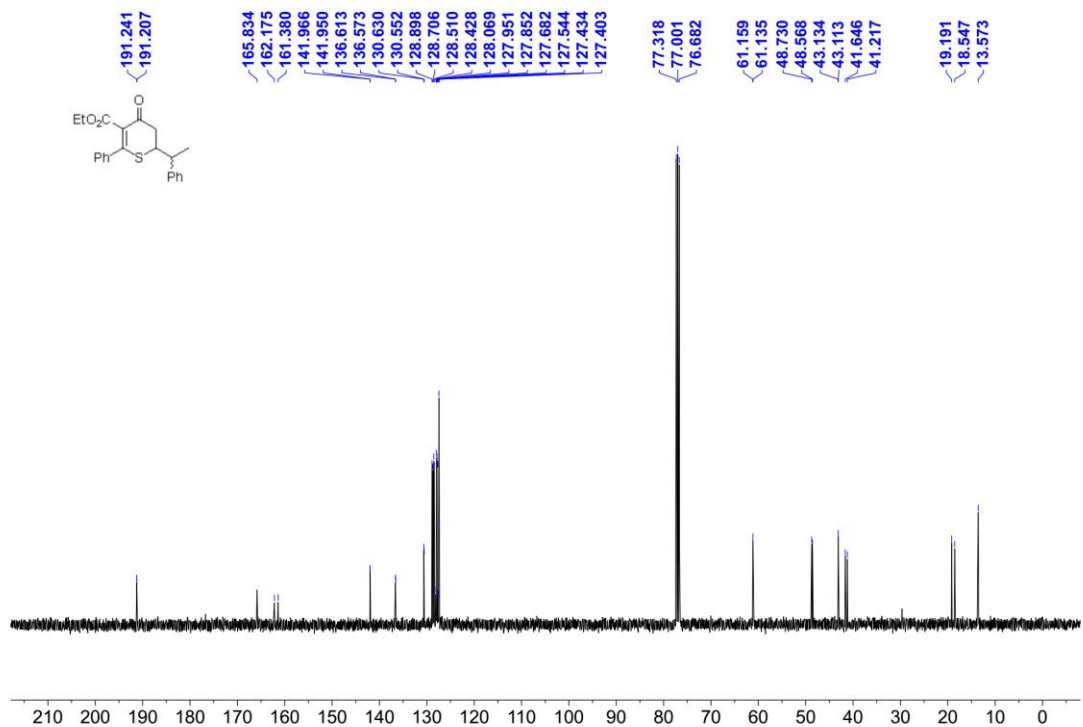

**HRMS**

Ethyl 2-methyl-2-(4-methylpent-3-en-1-yl)-4-oxo-6-phenyl-3,4-dihydro-2H-thiopyran-5-carboxylate (**3ar**)

<sup>1</sup>H NMR (400 MHz, CDCl<sub>3</sub>)

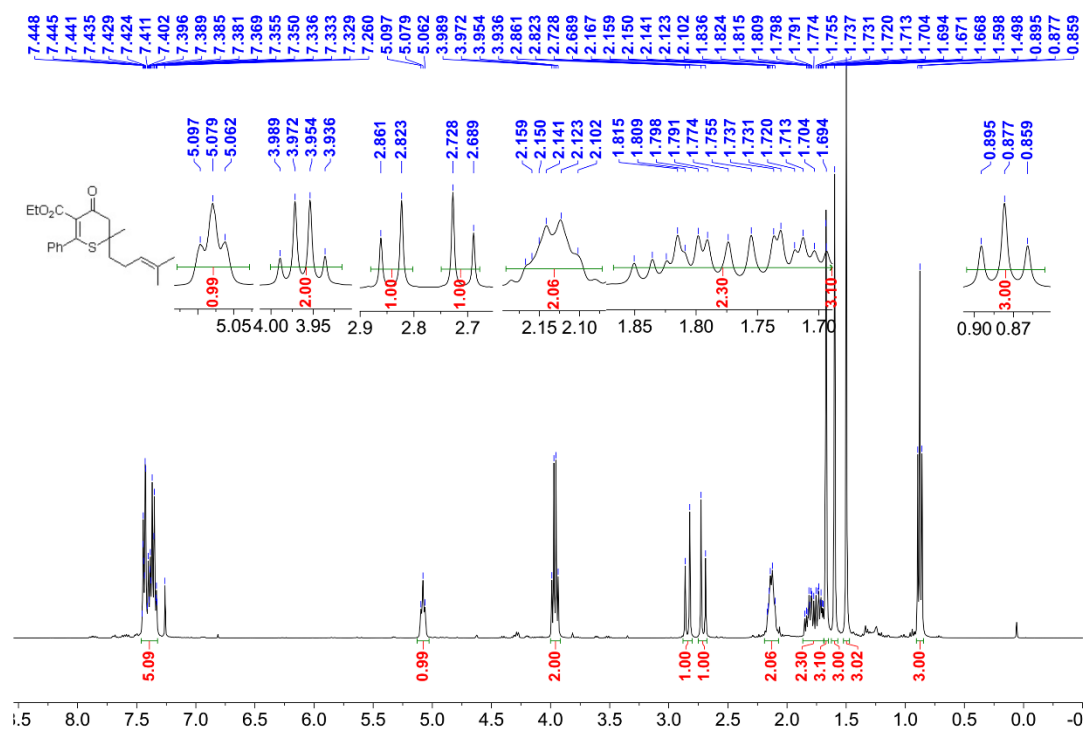

<sup>13</sup>C NMR{<sup>1</sup>H} (101 MHz, CDCl<sub>3</sub>)

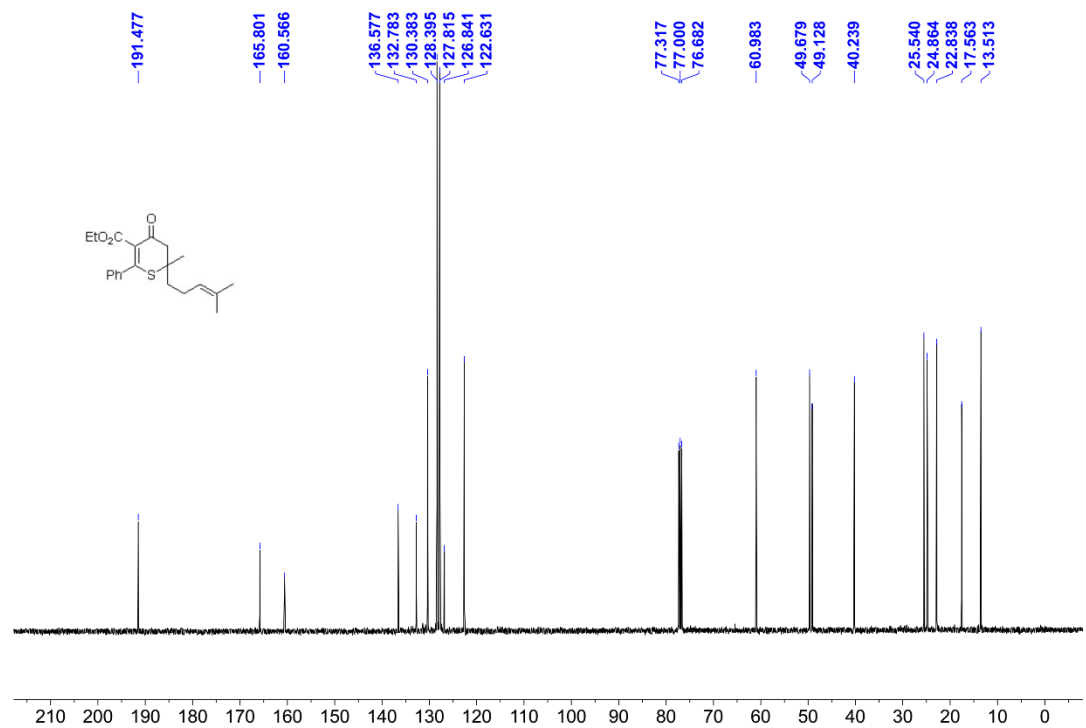



# HRMS

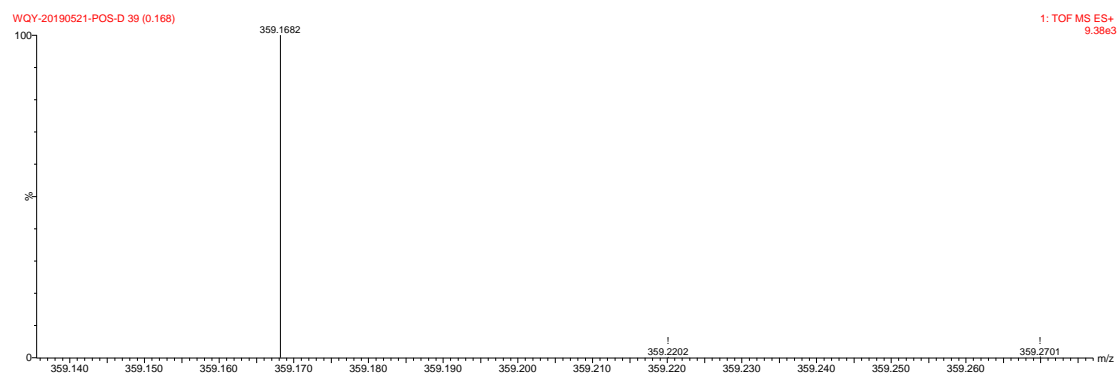

Ethyl 2-methyl-4-oxo-2,6-diphenyl-3,4-dihydro-2H-thiopyran-5-carboxylate (**3as**)

<sup>1</sup>H NMR (400 MHz, CDCl<sub>3</sub>)

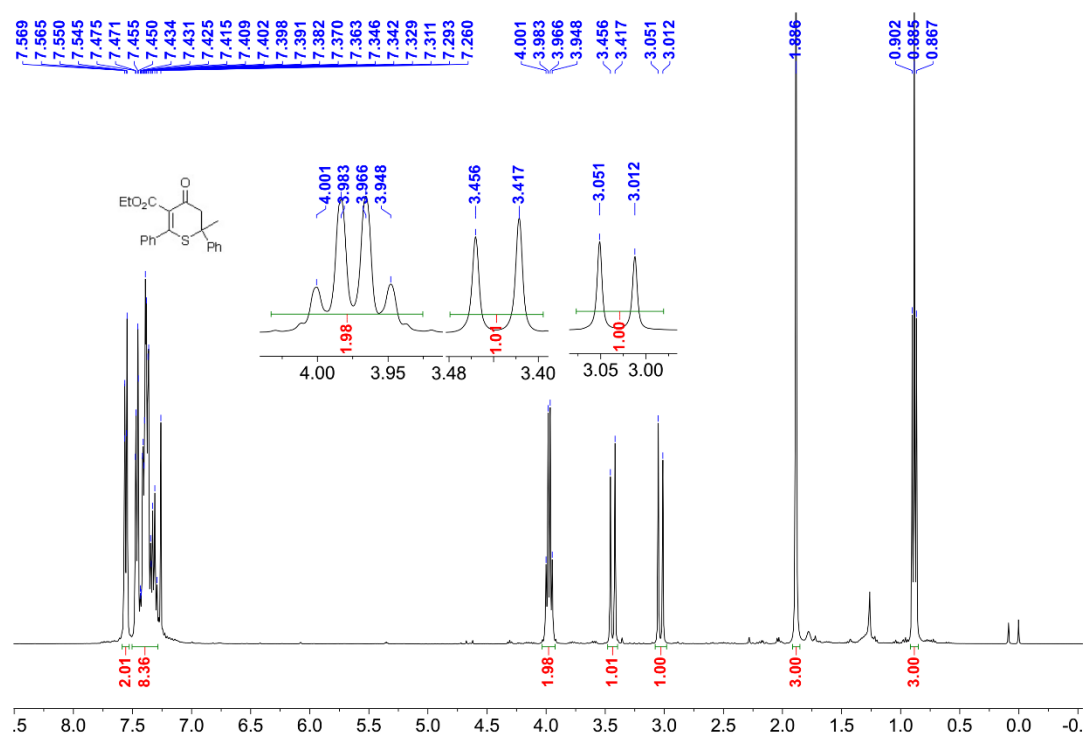

<sup>13</sup>C NMR{<sup>1</sup>H} (101 MHz, CDCl<sub>3</sub>)

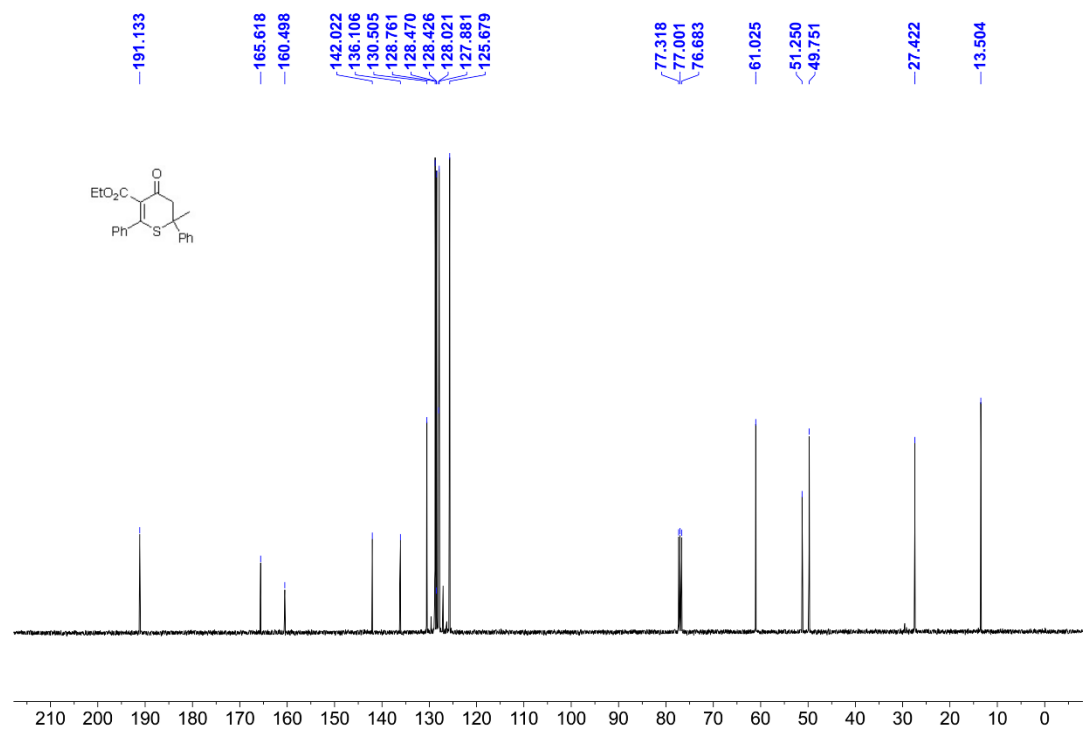

# HRMS

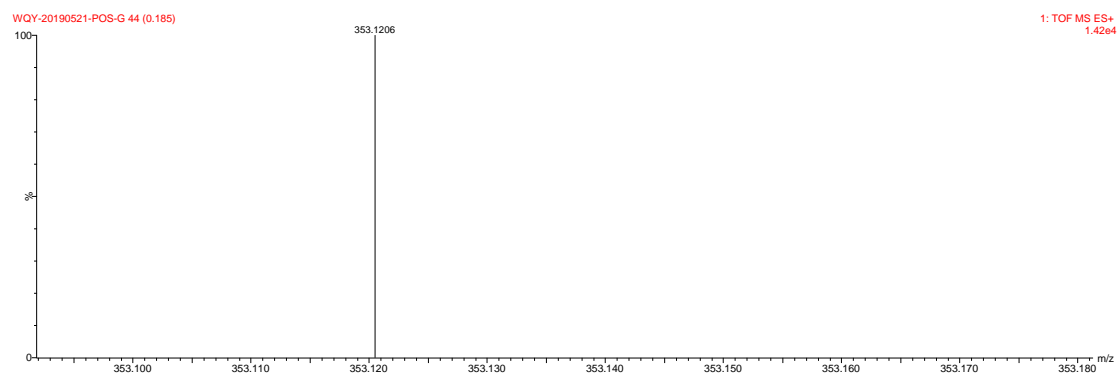

Ethyl 2-cyclopropyl-2-methyl-4-oxo-6-phenyl-3,4-dihydro-2H-thiopyran-5-carboxylate (**3at**)

<sup>1</sup>H NMR (400 MHz, CDCl<sub>3</sub>)

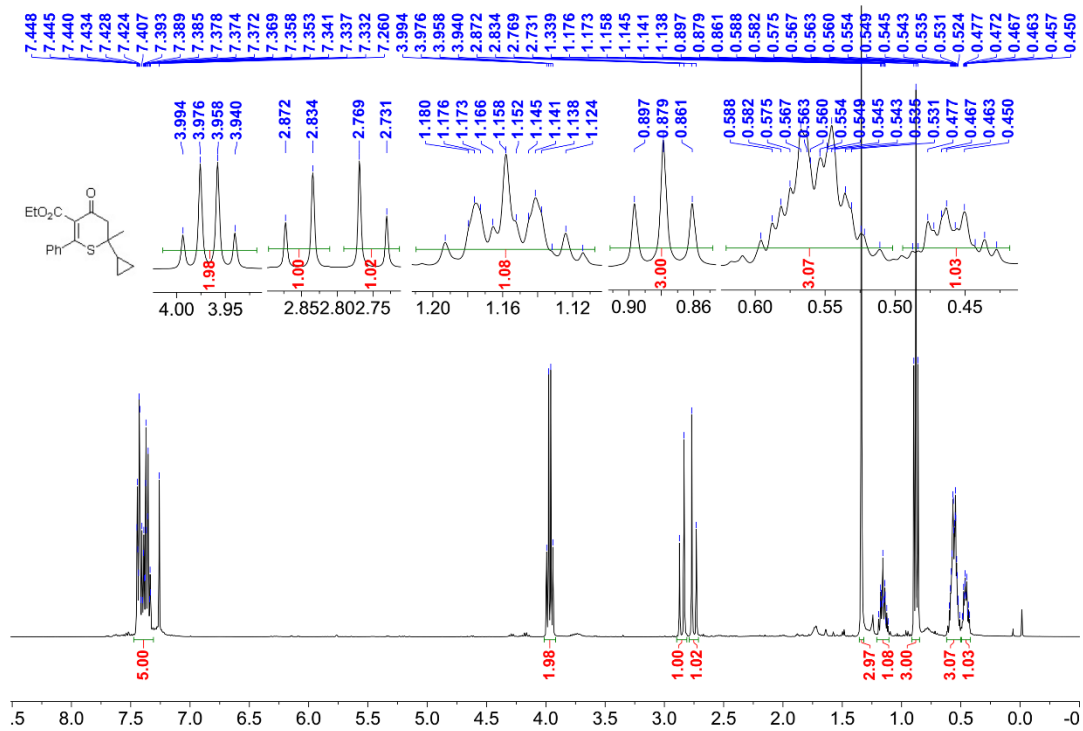

<sup>13</sup>C NMR{<sup>1</sup>H} (101 MHz, CDCl<sub>3</sub>)

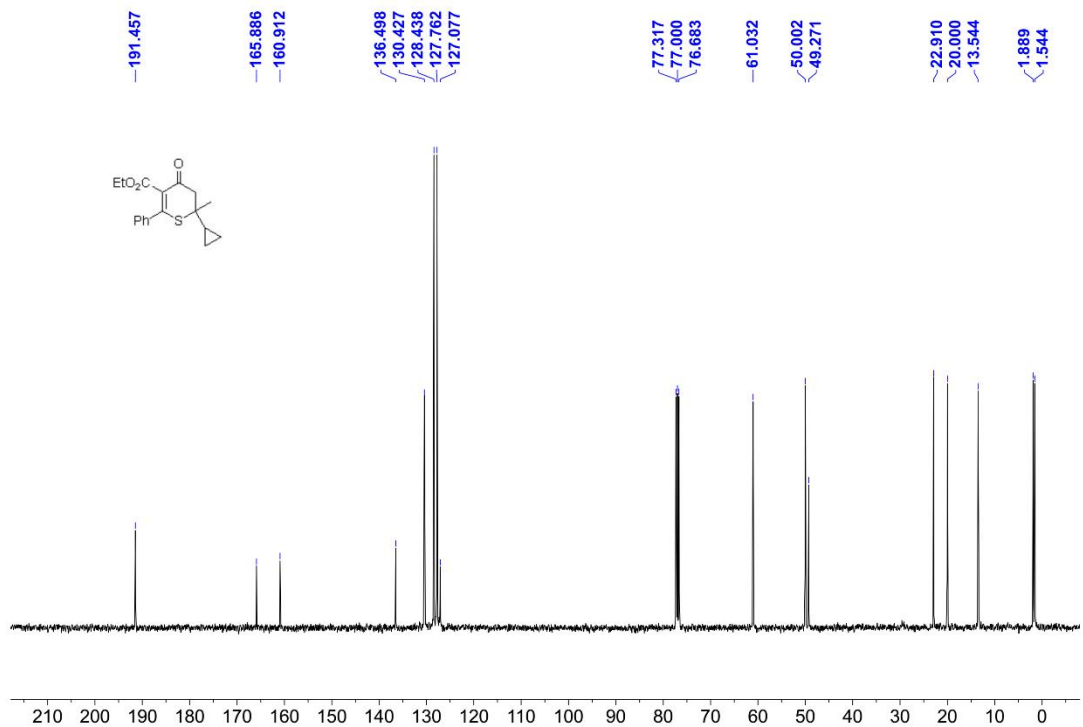

# HRMS

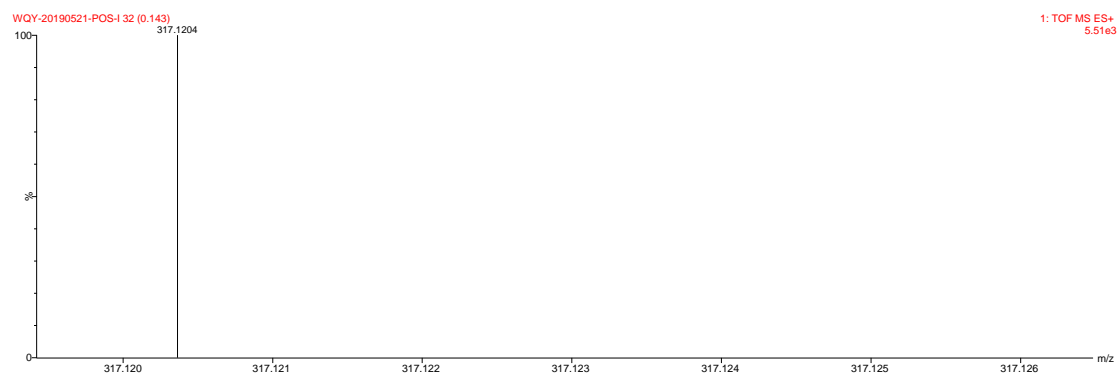

Ethyl 4-oxo-2-phenyl-1-thiaspiro[5.5]undeca-2,7-diene-3-carboxylate (**3ay**)

<sup>1</sup>H NMR (400 MHz, CDCl<sub>3</sub>)

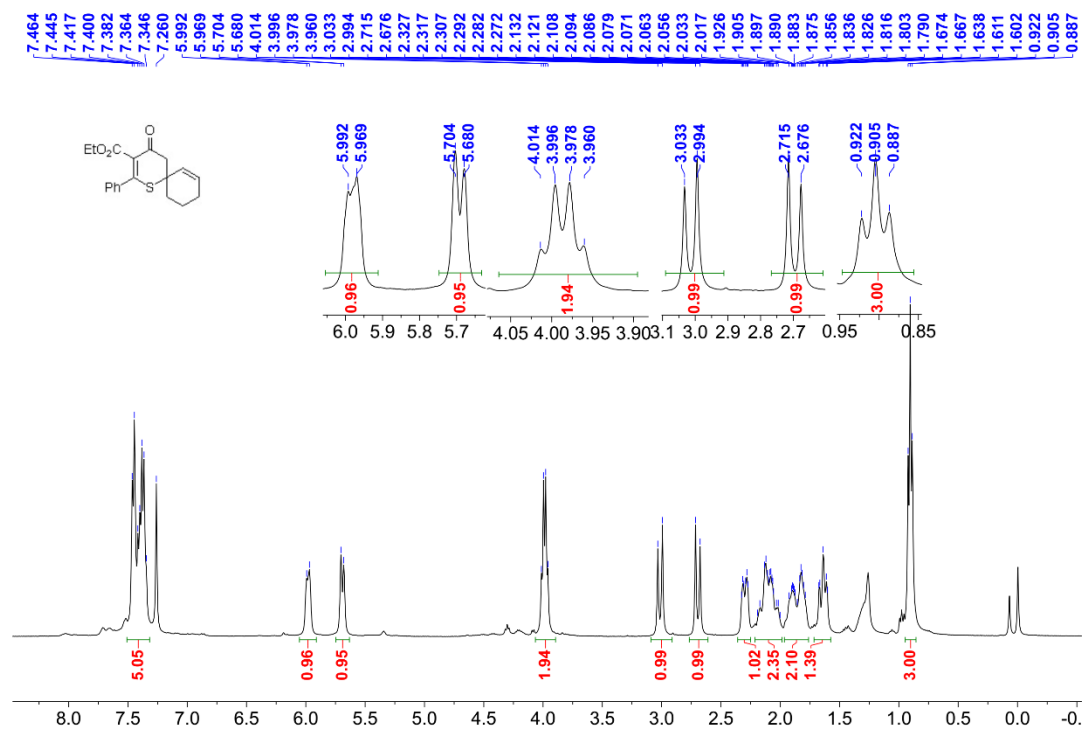

<sup>13</sup>C NMR{<sup>1</sup>H} (101 MHz, CDCl<sub>3</sub>)

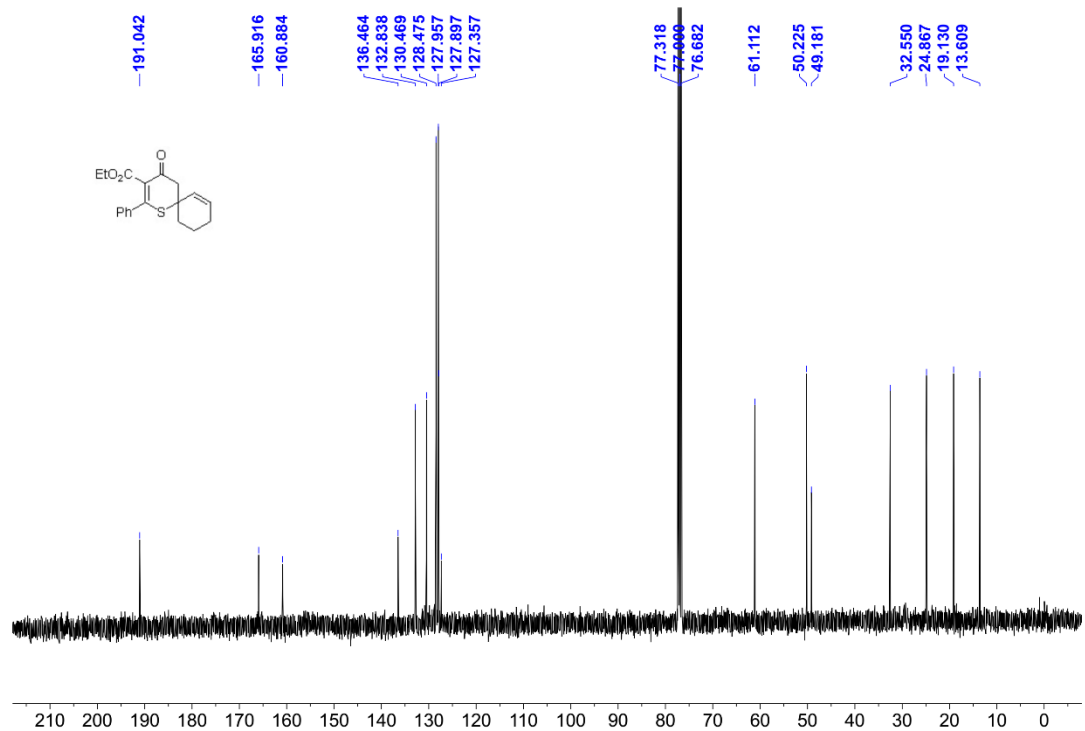

# HRMS

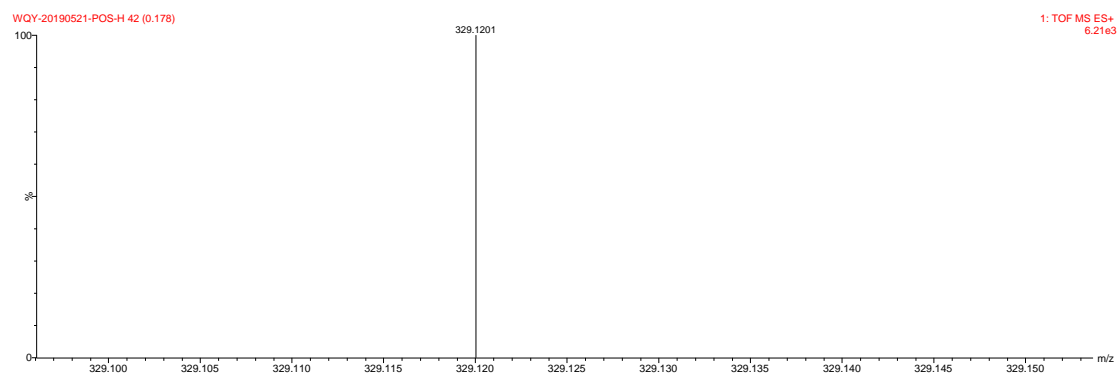

Ethyl 3-methyl-4-oxo-6-phenyl-3,4-dihydro-2H-thiopyran-5-carboxylate (**3aac**)

<sup>1</sup>H NMR (400 MHz, CDCl<sub>3</sub>)

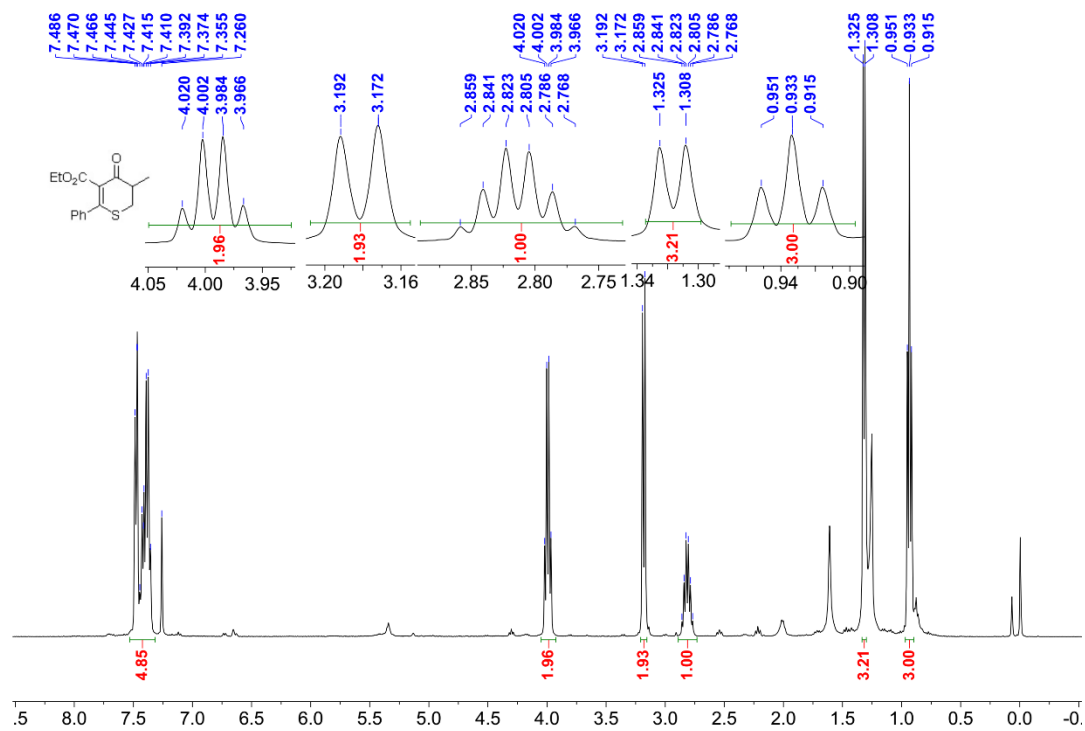

<sup>13</sup>C NMR{<sup>1</sup>H} (101 MHz, CDCl<sub>3</sub>)

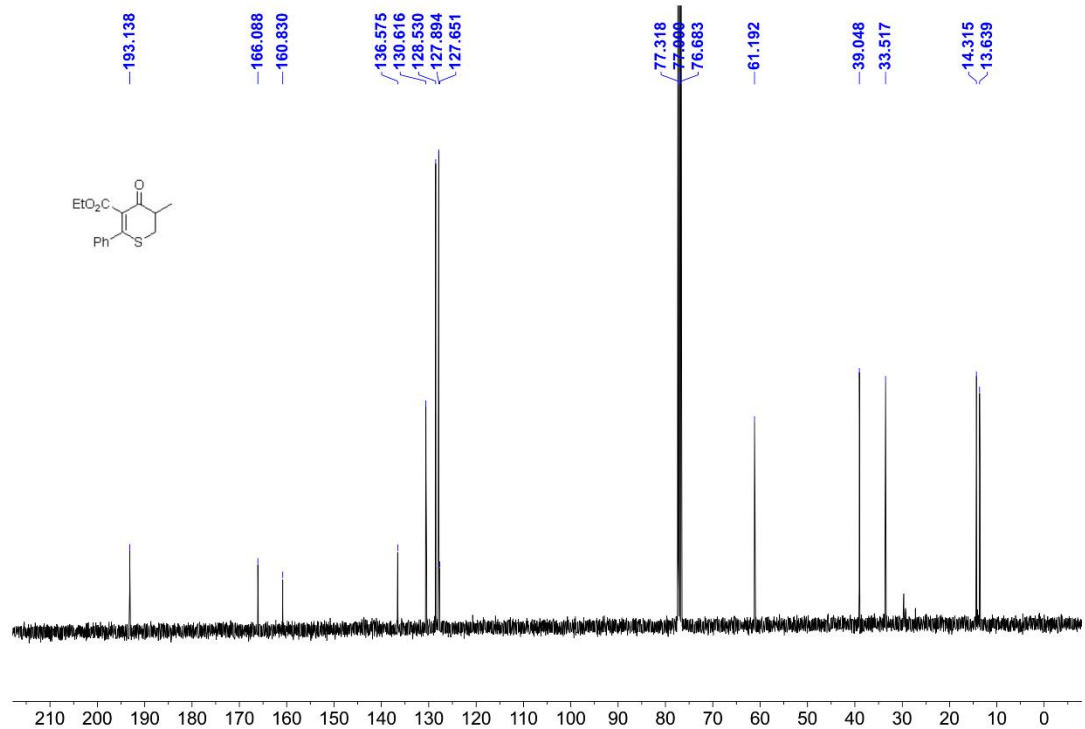



# HRMS

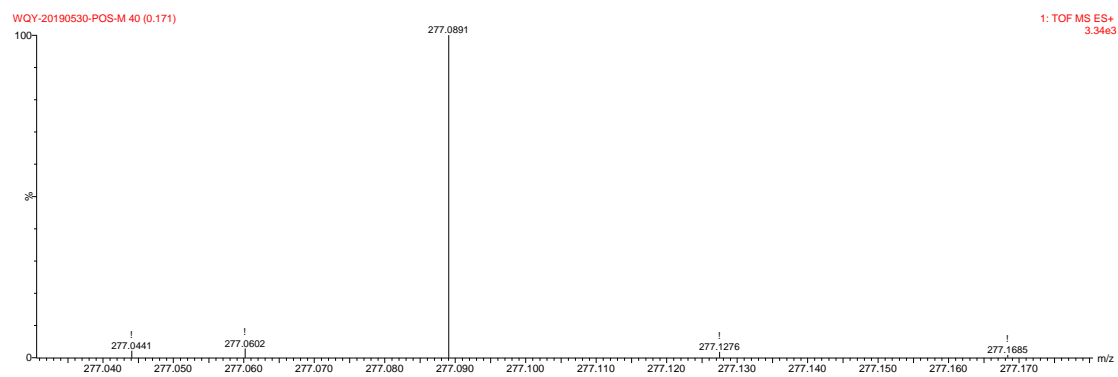

Ethyl 2,3-dimethyl-4-oxo-6-phenyl-3,4-dihydro-2H-thiopyran-5-carboxylate (**3aad**, dr = 2:1)  
<sup>1</sup>H NMR (400 MHz, CDCl<sub>3</sub>)

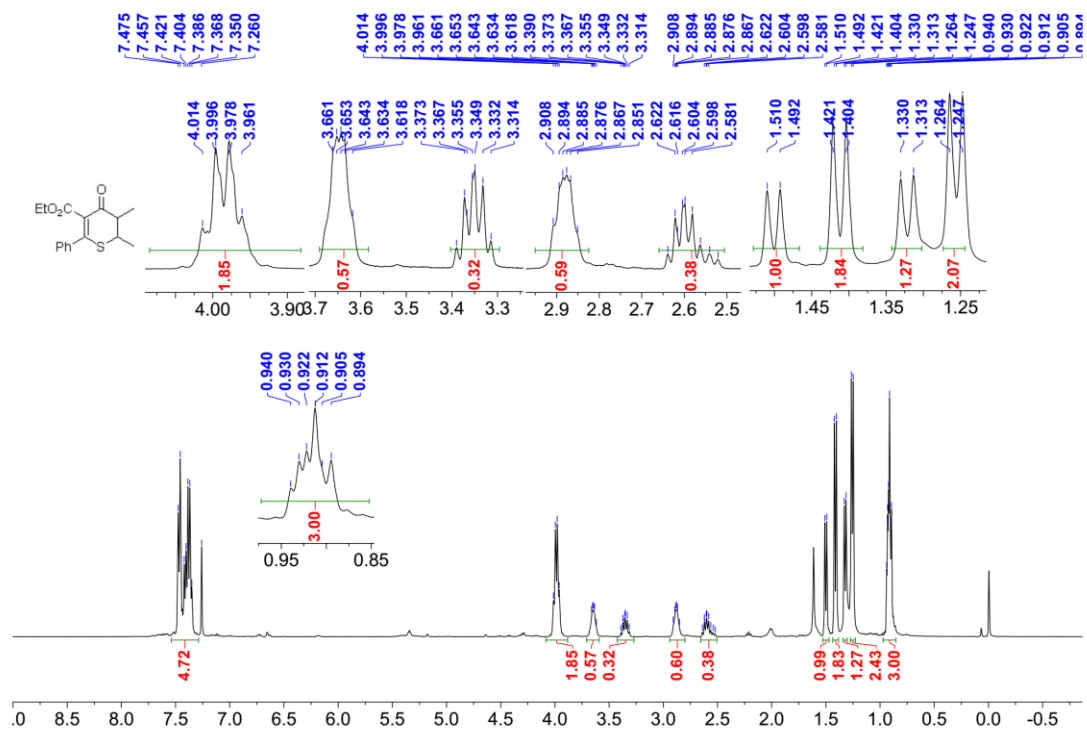

<sup>13</sup>C NMR{<sup>1</sup>H} (101 MHz, CDCl<sub>3</sub>)

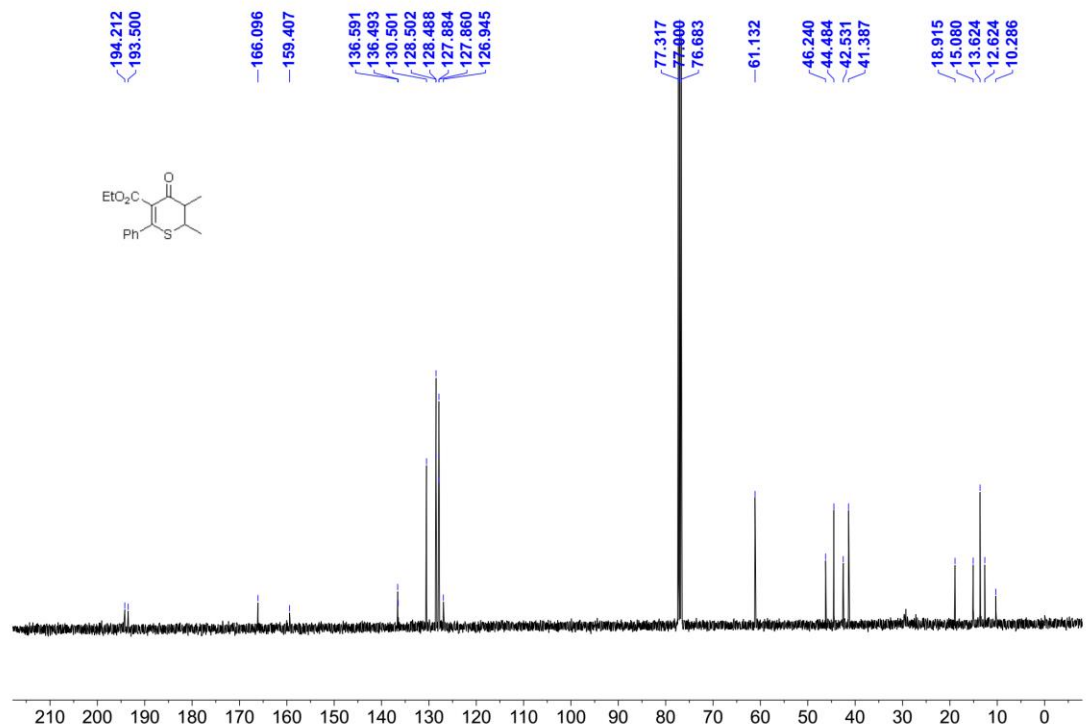

# HRMS

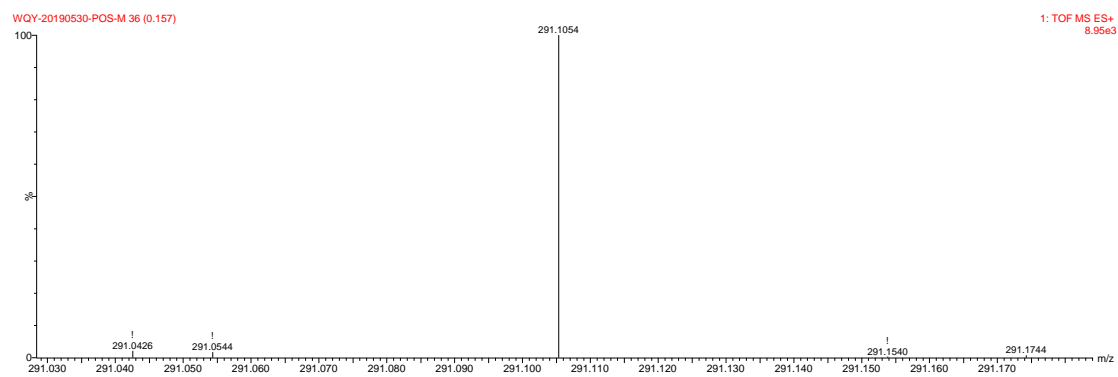

Ethyl 3-methyl-4-oxo-2,6-diphenyl-3,4-dihydro-2H-thiopyran-5-carboxylate (**3a<sub>ae</sub>**-single isomer)

<sup>1</sup>H NMR (400 MHz, CDCl<sub>3</sub>)

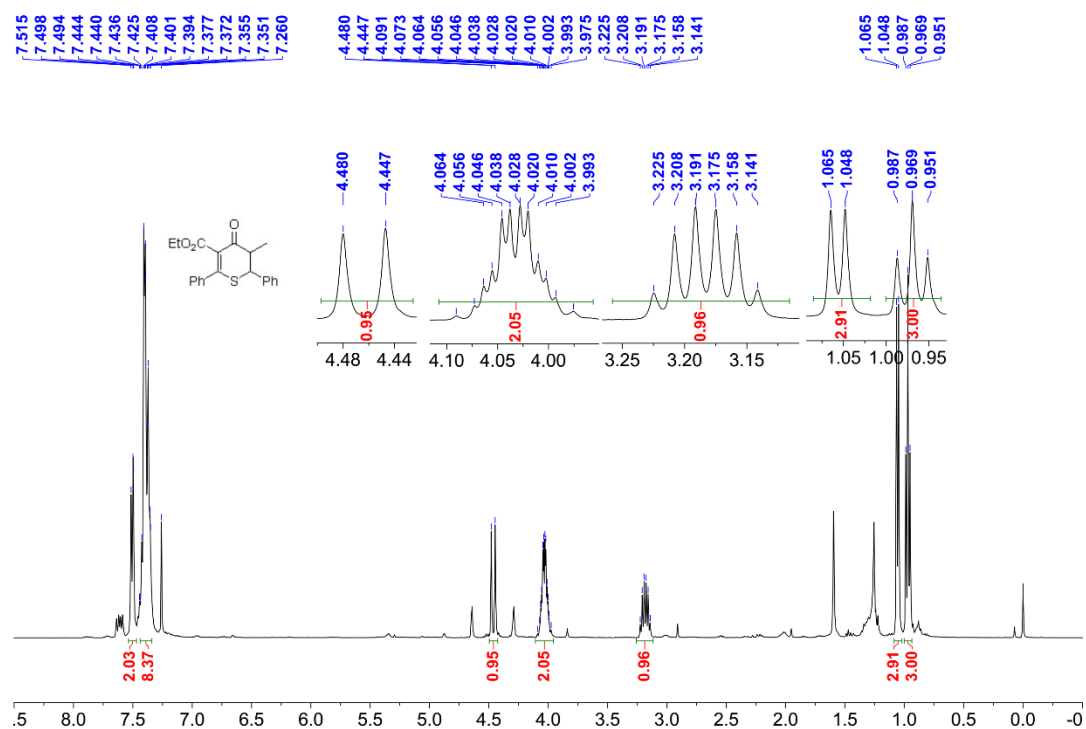

<sup>13</sup>C NMR{<sup>1</sup>H} (101 MHz, CDCl<sub>3</sub>)

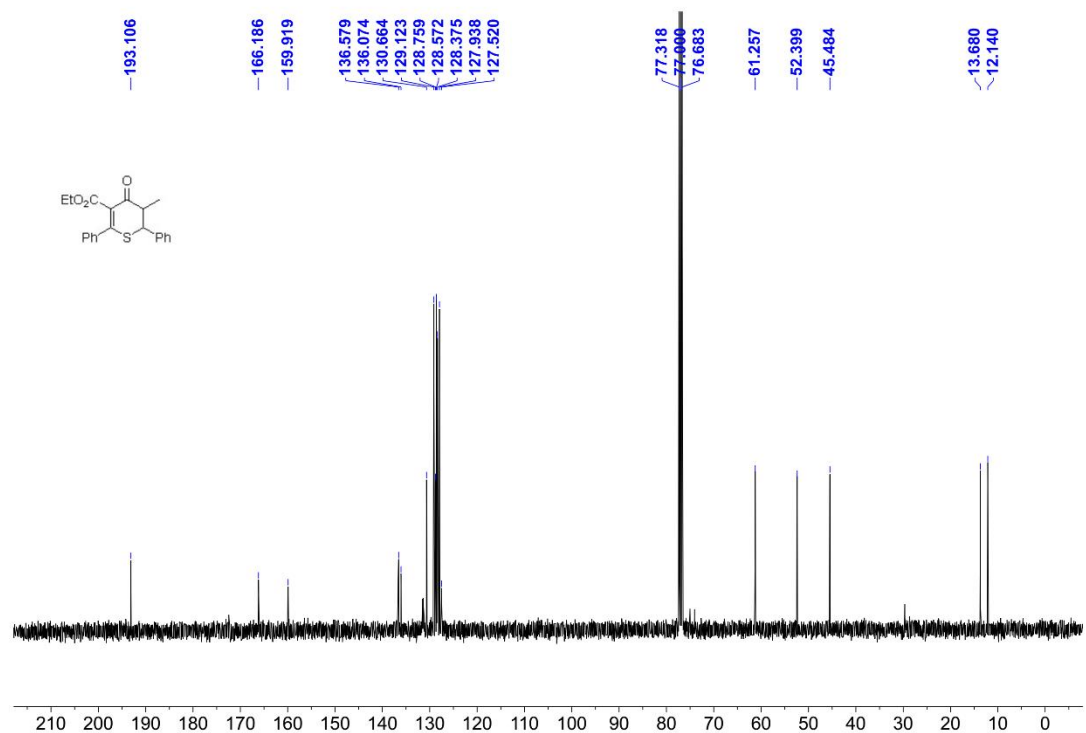

Ethyl 3-methyl-4-oxo-2,6-diphenyl-3,4-dihydro-2H-thiopyran-5-carboxylate (**3aae**, dr = 2:1)

<sup>1</sup>H NMR (400 MHz, CDCl<sub>3</sub>)

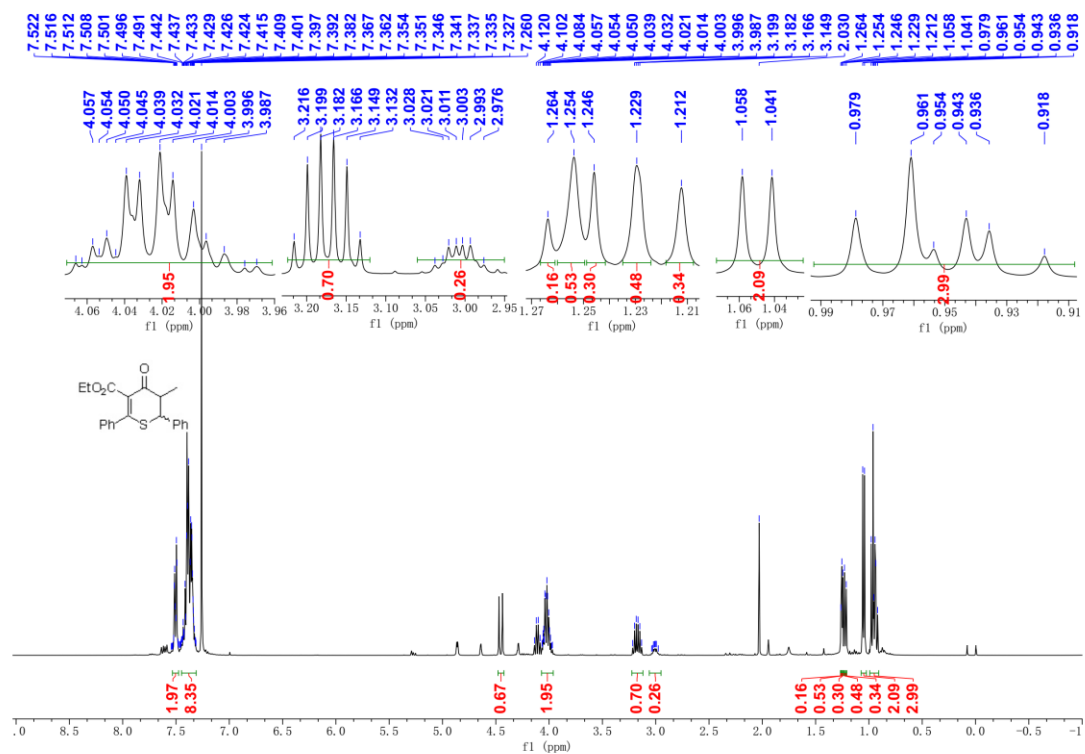

<sup>13</sup>C NMR{<sup>1</sup>H} (101 MHz, CDCl<sub>3</sub>)

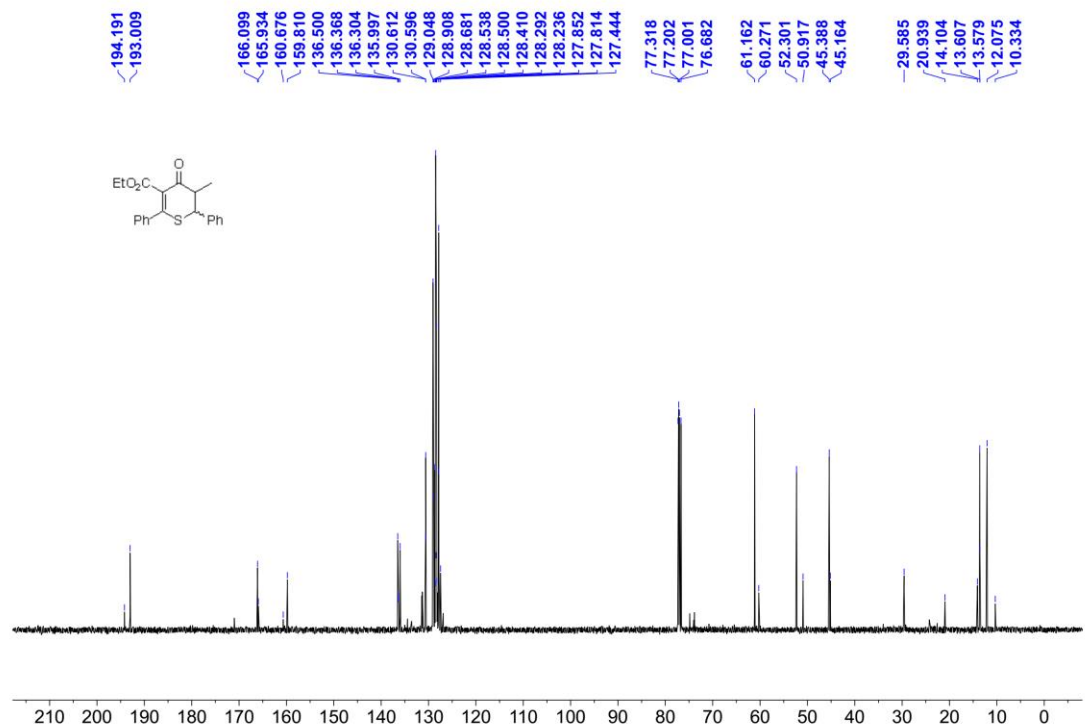

# HRMS

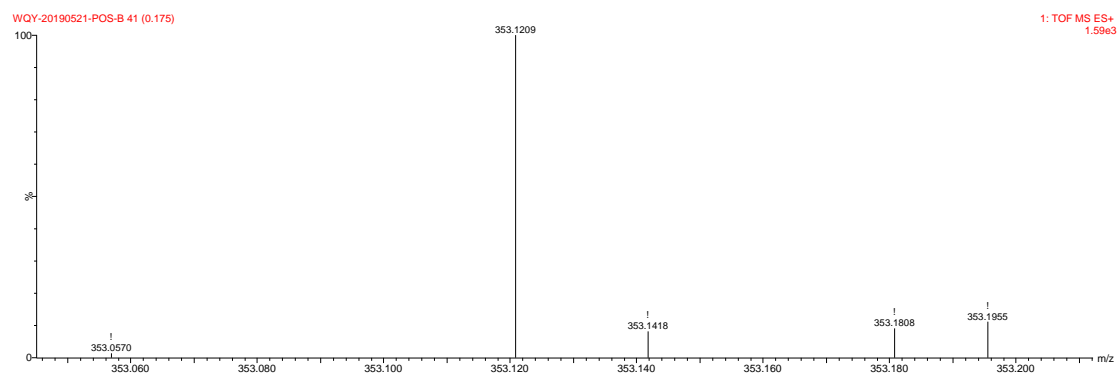

Ethyl 3-methyl-4-oxo-2,6-diphenyl-3,4-dihydro-2H-thiopyran-5-carboxylate (3aae,  
diastereomers repurified)

<sup>1</sup>H NMR (400 MHz, CDCl<sub>3</sub>)

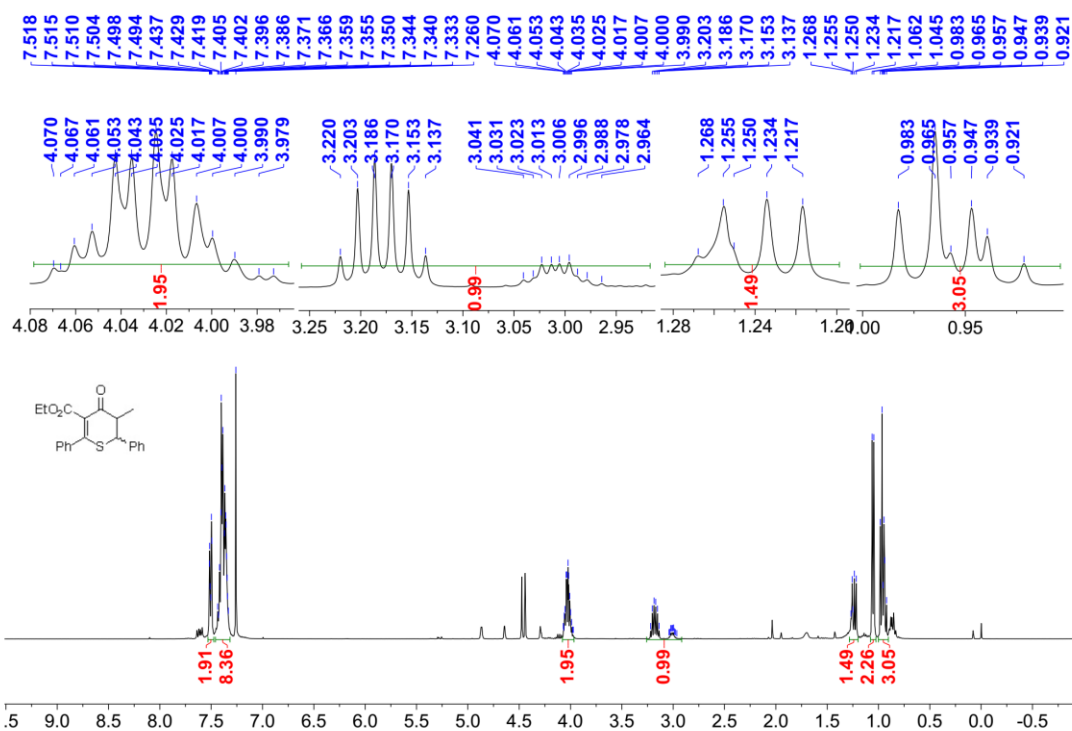

<sup>13</sup>C NMR{<sup>1</sup>H} (101 MHz, CDCl<sub>3</sub>)

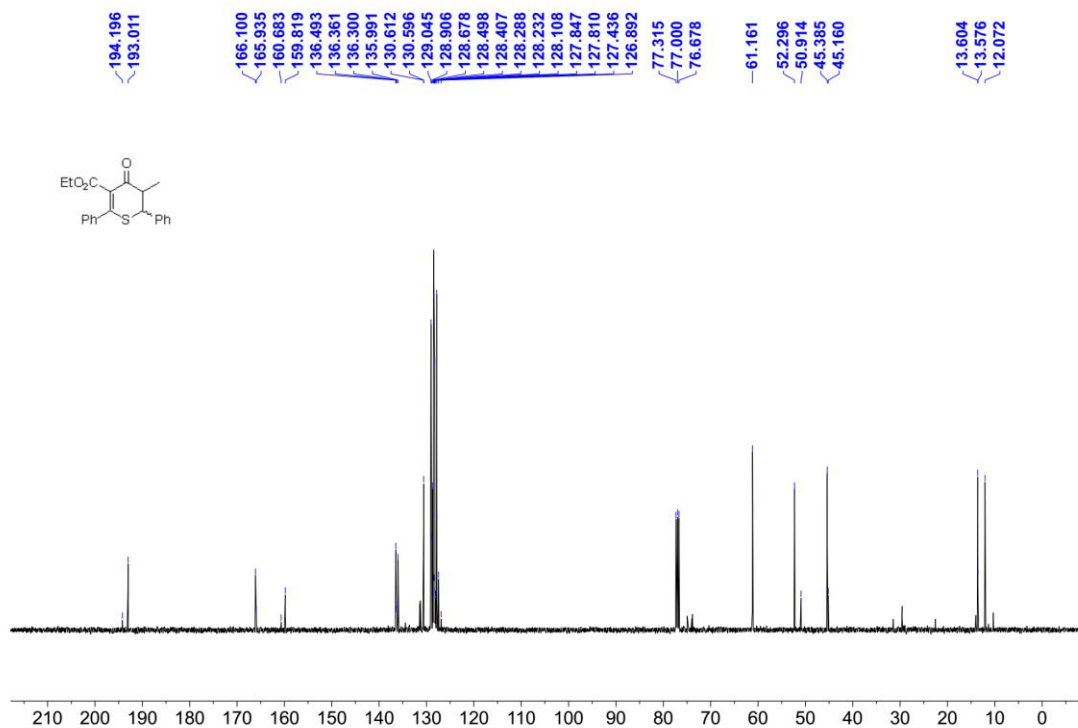

Ethyl 6-(benzo[d][1,3]dioxol-5-yl)-2,2-dimethyl-4-oxo-3,4-dihydro-2H-thiopyran-5-carboxylate  
(3ba)

<sup>1</sup>H NMR (400 MHz, CDCl<sub>3</sub>)

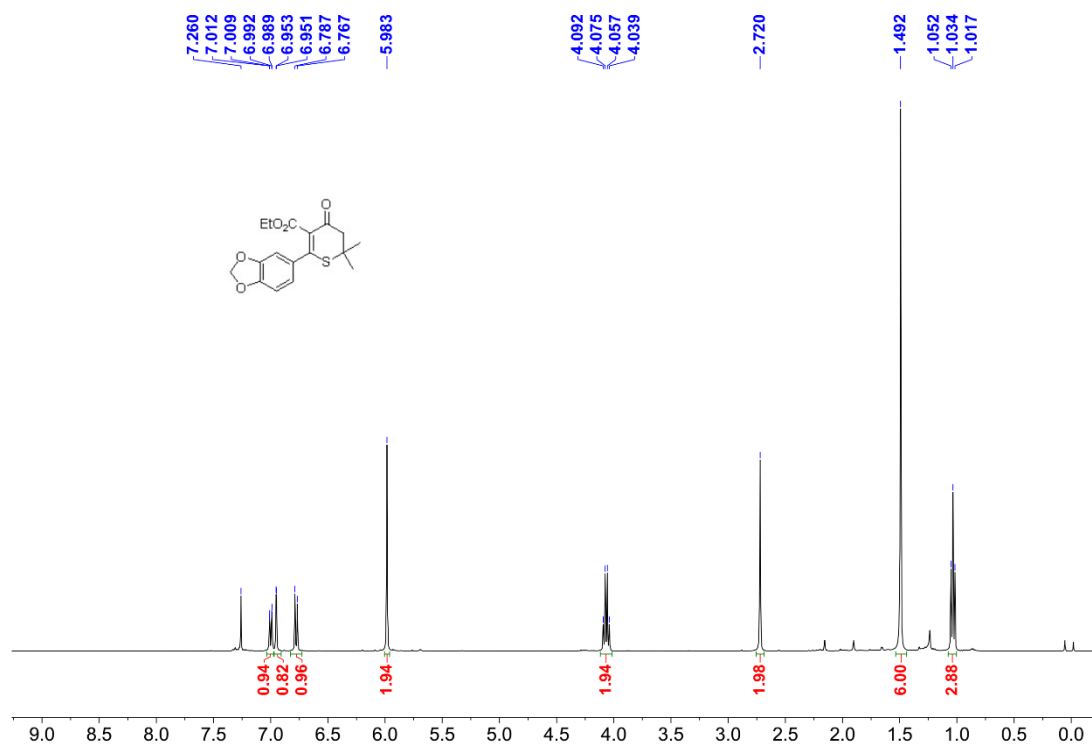

<sup>13</sup>C NMR{<sup>1</sup>H} (101 MHz, CDCl<sub>3</sub>)

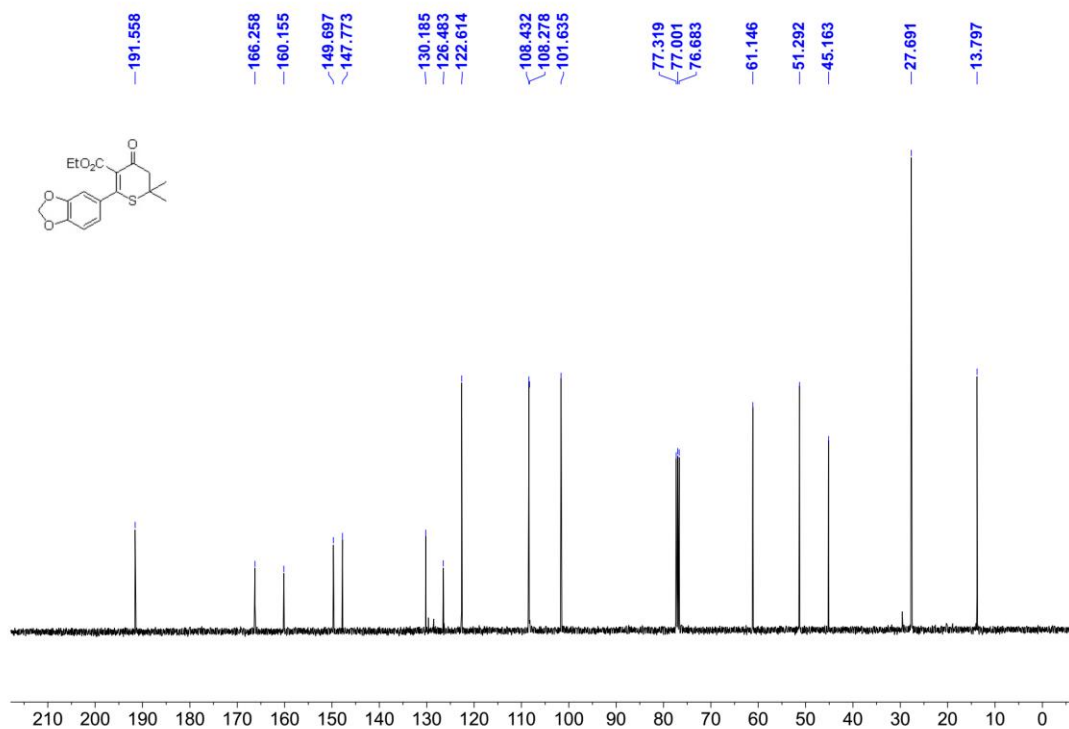



# HRMS

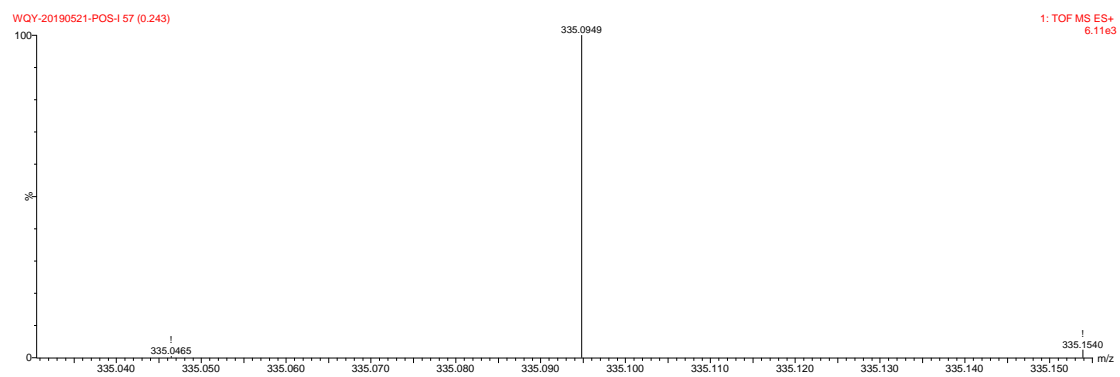

Ethyl 6-(4-methoxyphenyl)-2,2-dimethyl-4-oxo-3,4-dihydro-2H-thiopyran-5-carboxylate (**3ca**)  
<sup>1</sup>H NMR (400 MHz, CDCl<sub>3</sub>)

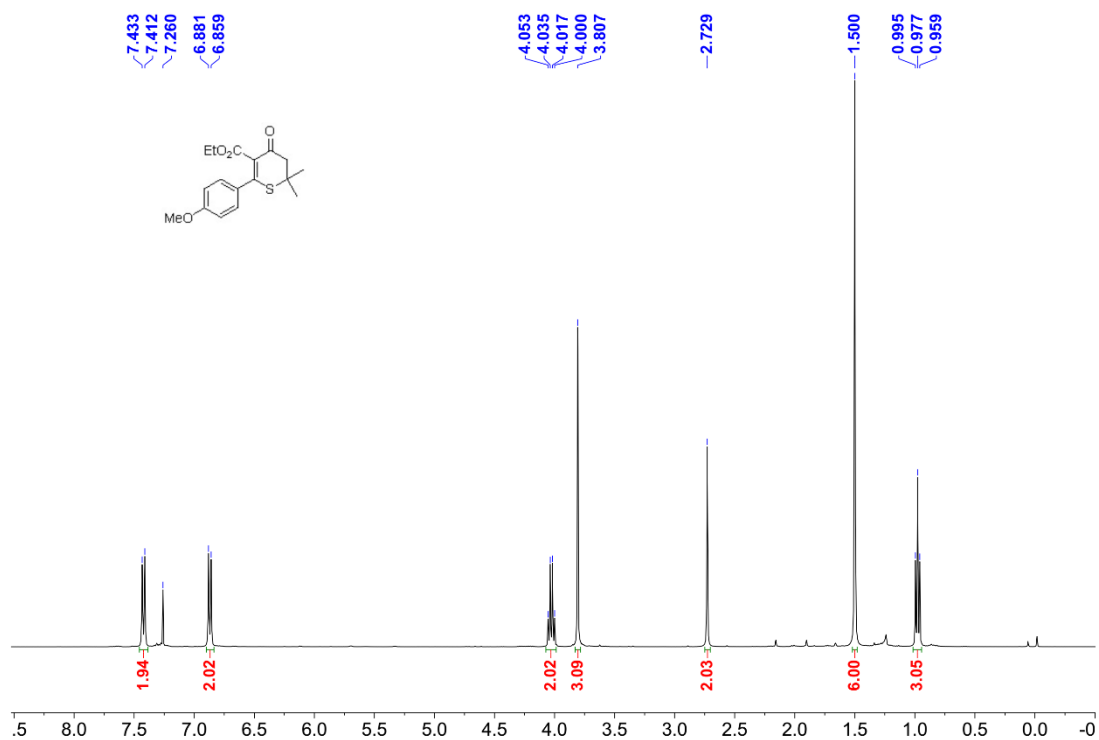

<sup>13</sup>C NMR{<sup>1</sup>H} (101 MHz, CDCl<sub>3</sub>)

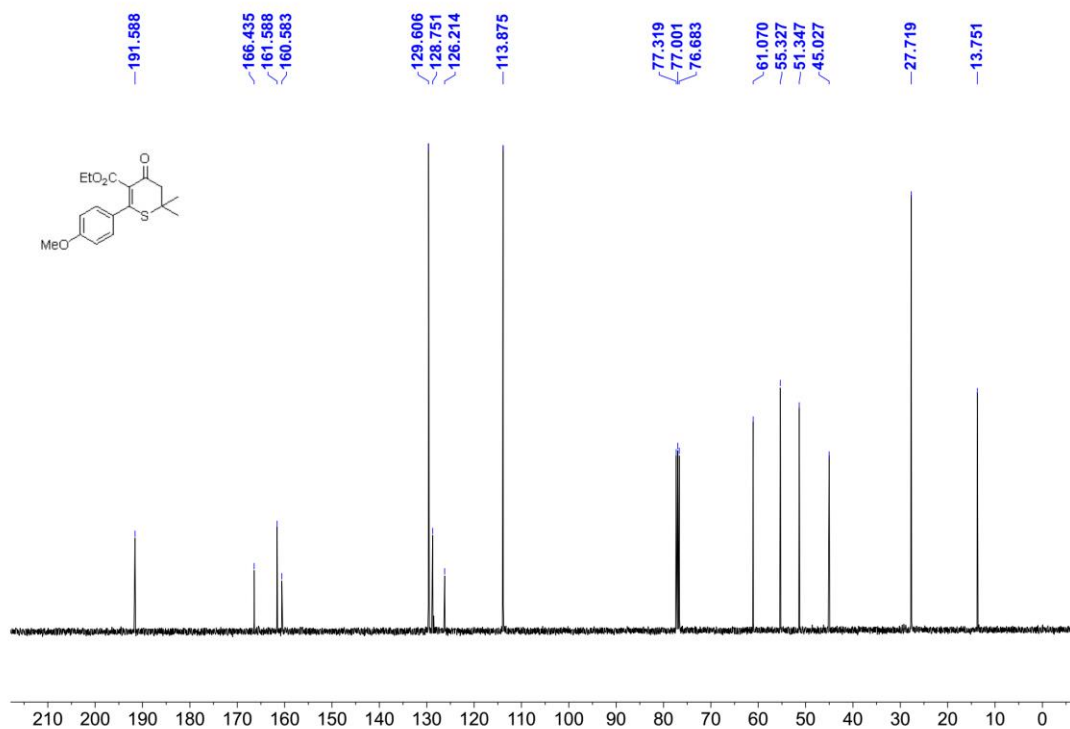

# HRMS

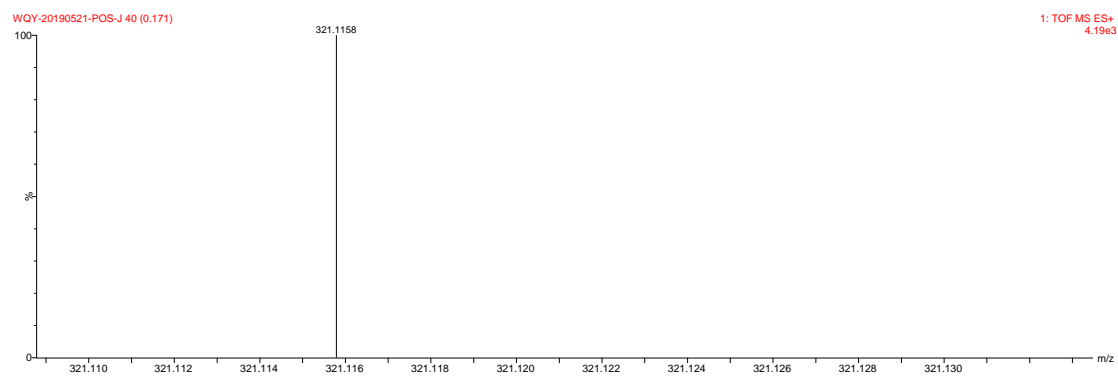

Ethyl 2,2-dimethyl-4-oxo-6-(p-tolyl)-3,4-dihydro-2H-thiopyran-5-carboxylate (**3da**)

<sup>1</sup>H NMR (400 MHz, CDCl<sub>3</sub>)

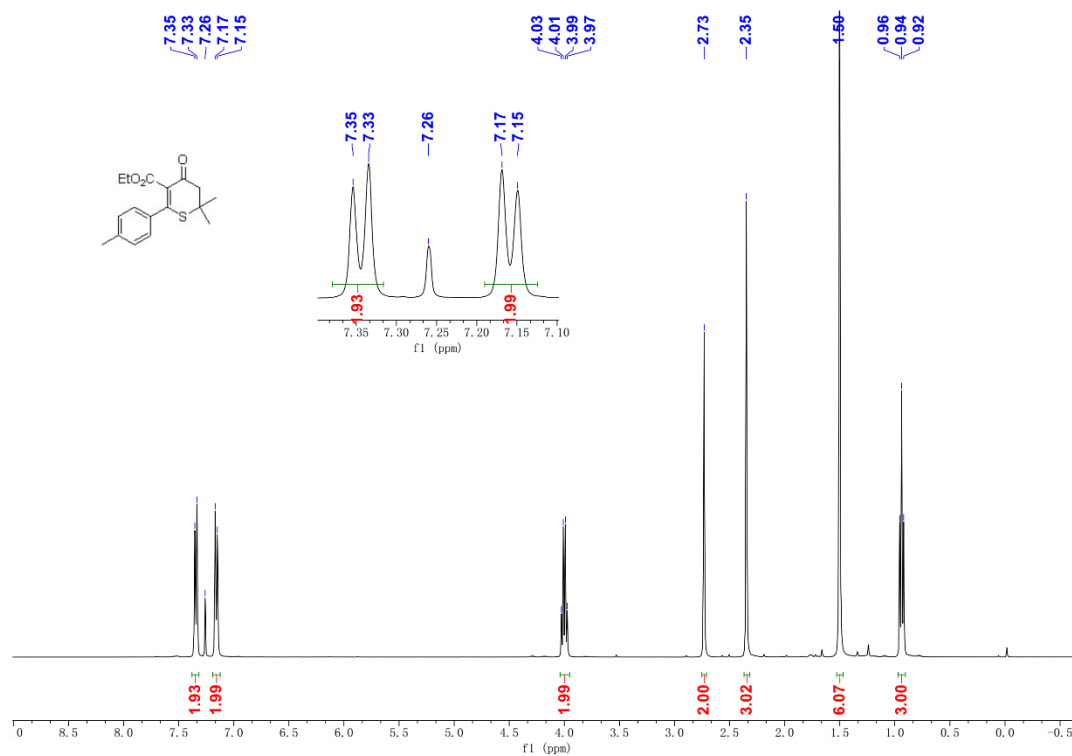

<sup>13</sup>C NMR{<sup>1</sup>H} (101 MHz, CDCl<sub>3</sub>)

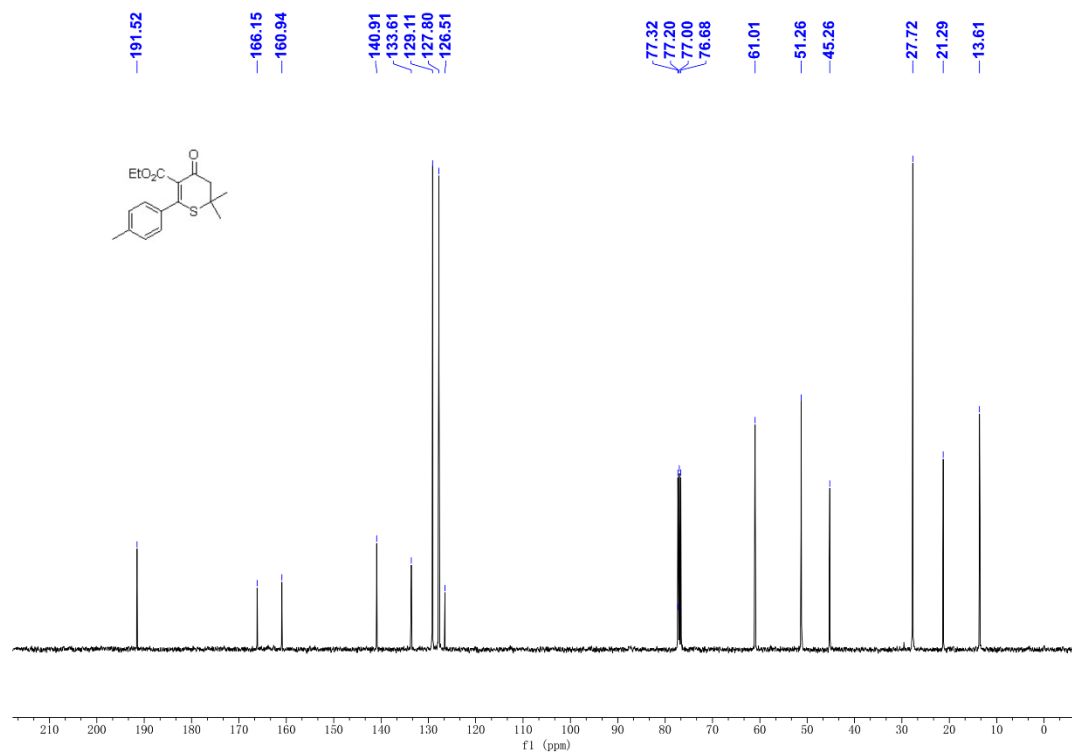

# HRMS

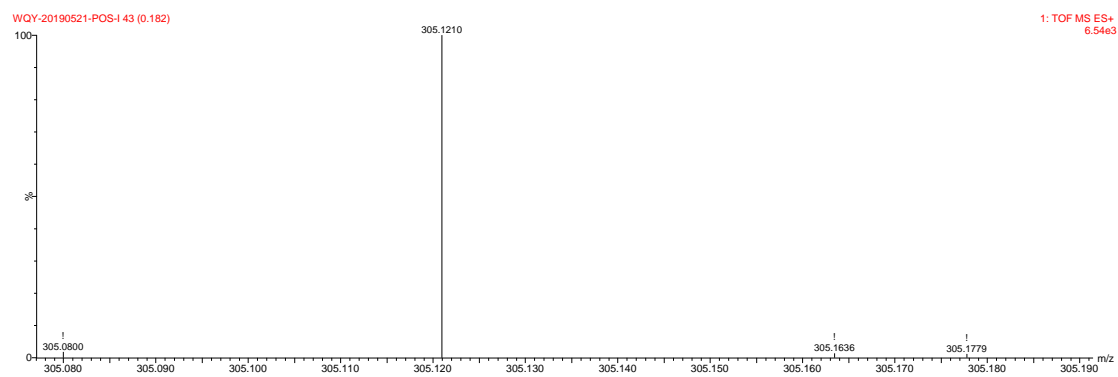

Ethyl 6-(4-fluorophenyl)-2,2-dimethyl-4-oxo-3,4-dihydro-2H-thiopyran-5-carboxylate (**3ea**)

<sup>1</sup>H NMR (400 MHz, CDCl<sub>3</sub>)

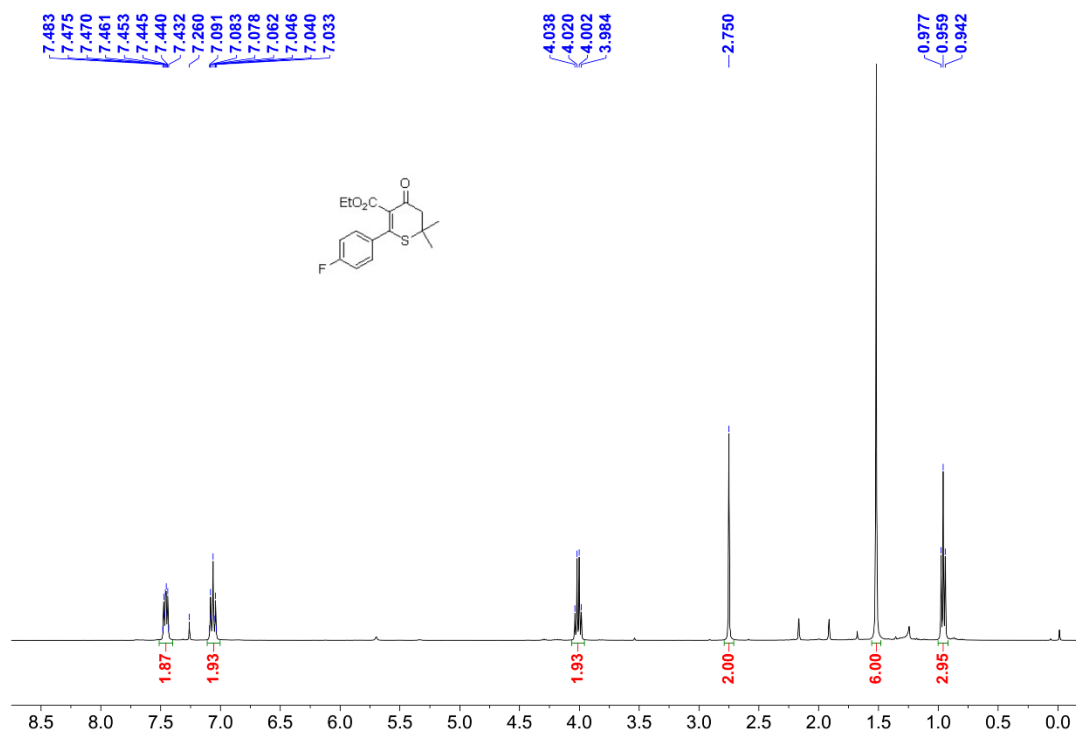

<sup>13</sup>C NMR{<sup>1</sup>H} (101 MHz, CDCl<sub>3</sub>)

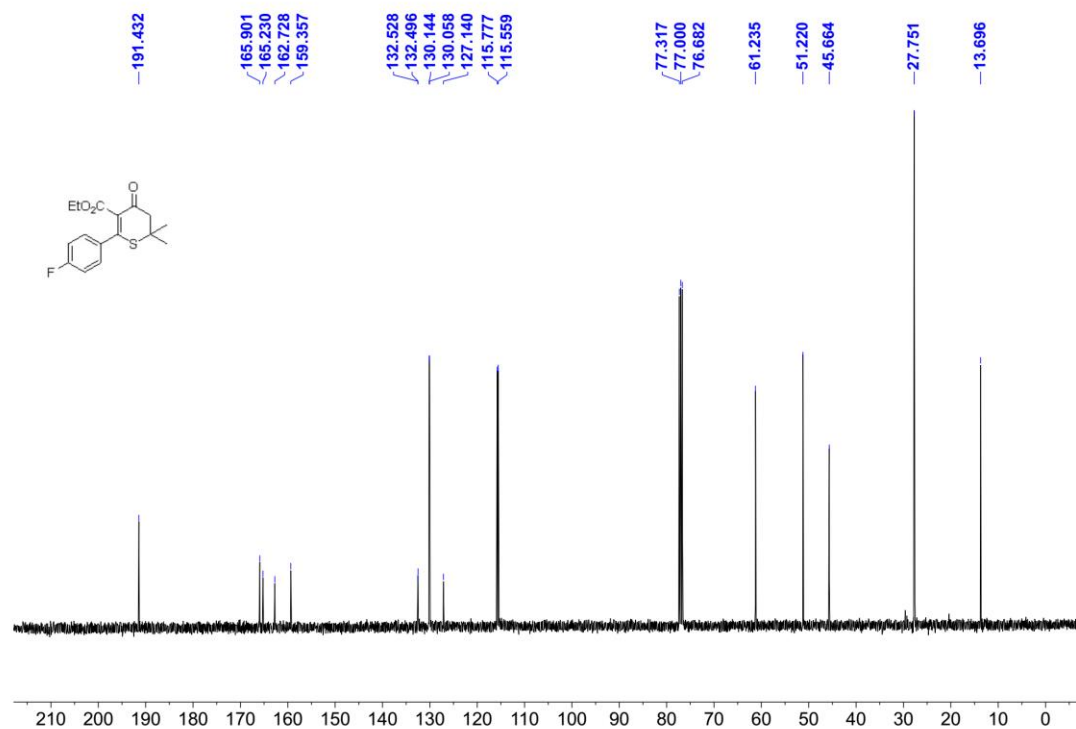

**$^{19}\text{F}$  NMR{ $^1\text{H}$  } (376 MHz,  $\text{CDCl}_3$ )**

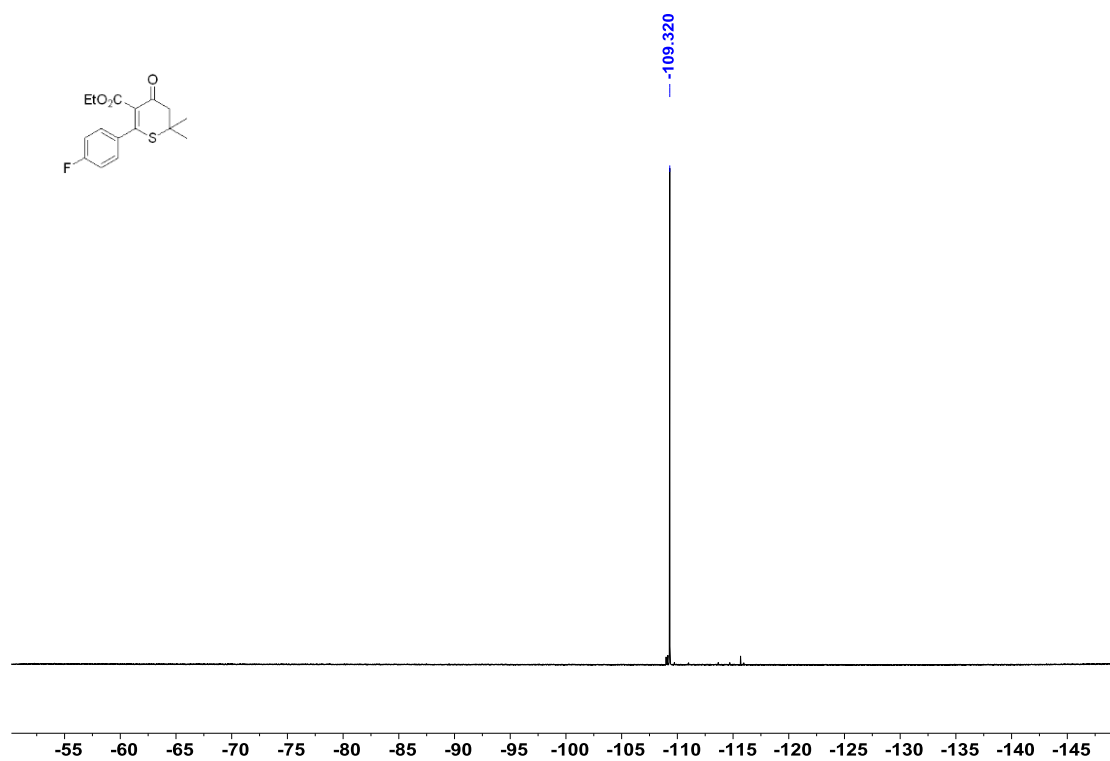

**HRMS**

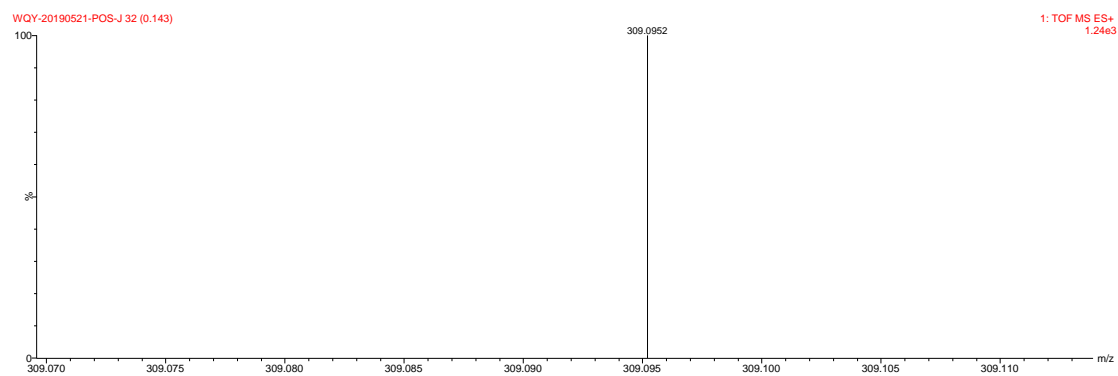

Ethyl 6-(4-chlorophenyl)-2,2-dimethyl-4-oxo-3,4-dihydro-2H-thiopyran-5-carboxylate (**3fa**)  
<sup>1</sup>H NMR (400 MHz, CDCl<sub>3</sub>)

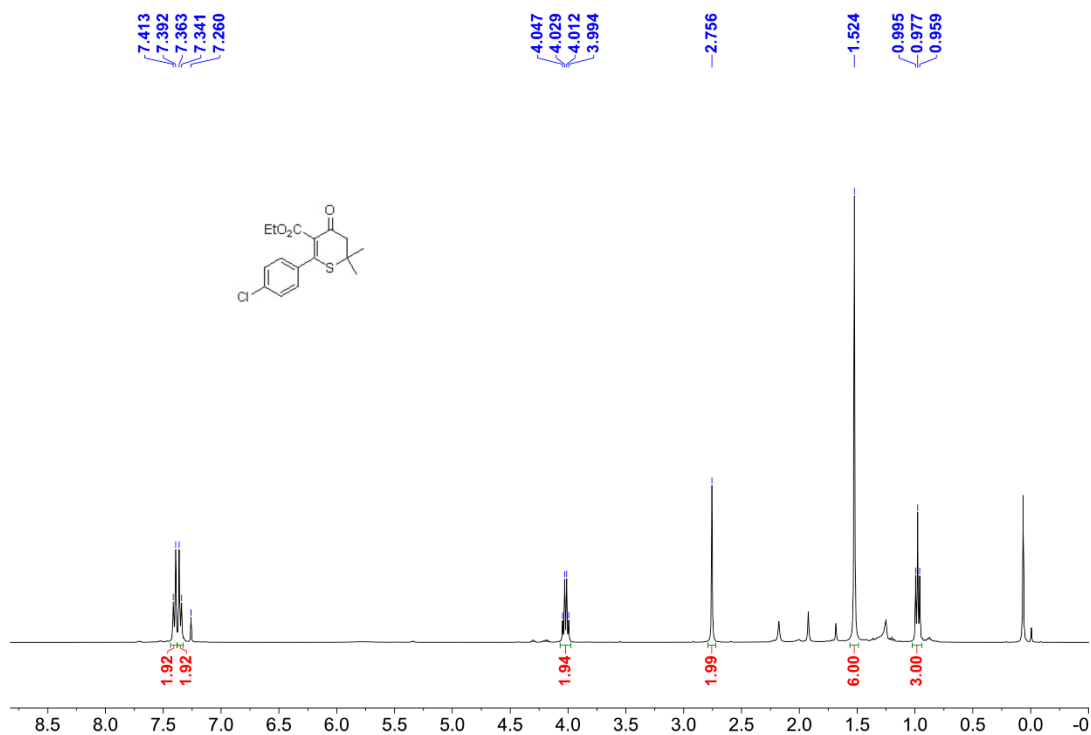

<sup>13</sup>C NMR{<sup>1</sup>H} (101 MHz, CDCl<sub>3</sub>)

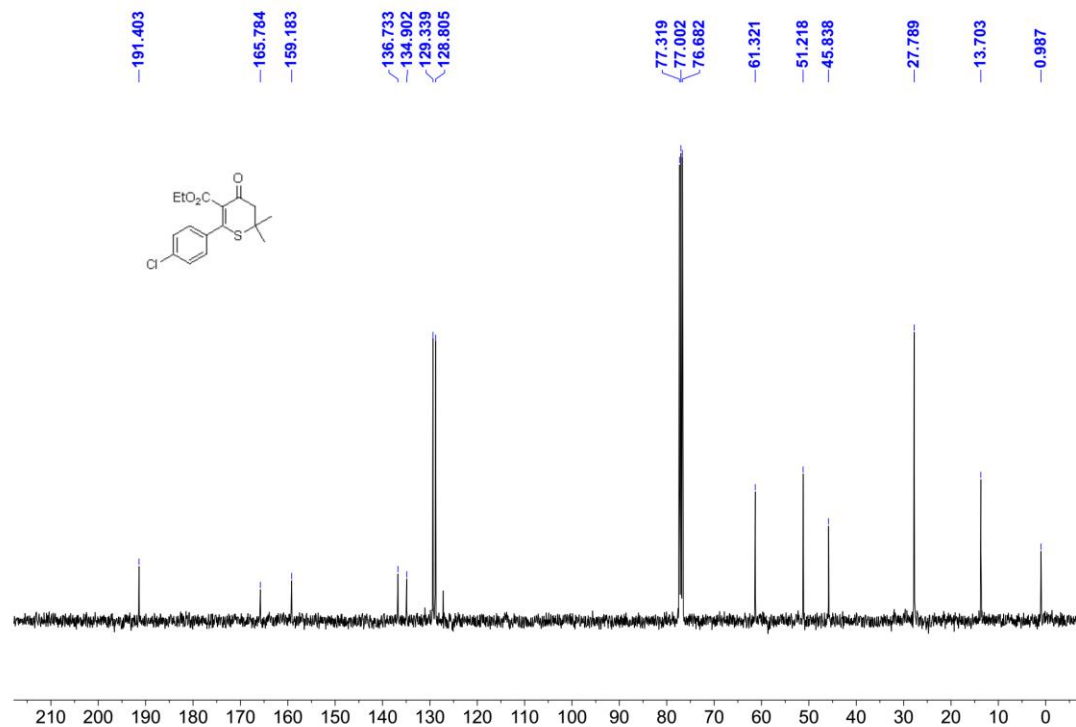



# HRMS

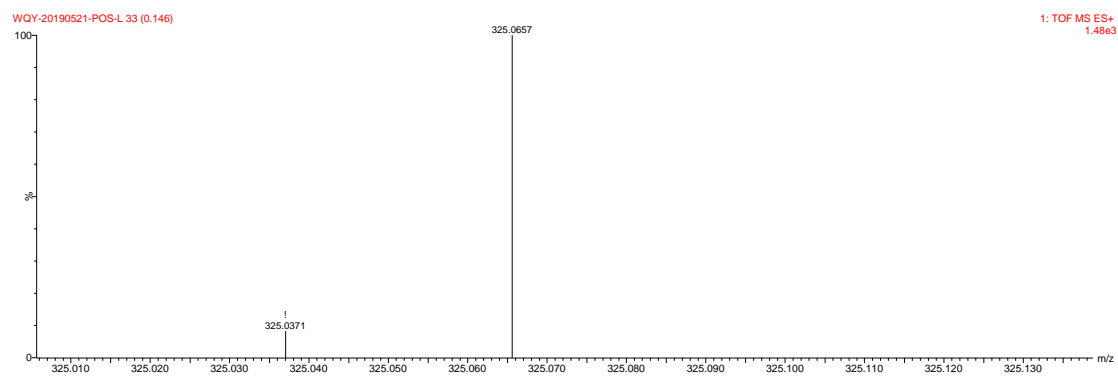

Ethyl 6-(3,4-dichlorophenyl)-2,2-dimethyl-4-oxo-3,4-dihydro-2H-thiopyran-5-carboxylate (**3ga**)  
<sup>1</sup>H NMR (400 MHz, CDCl<sub>3</sub>)

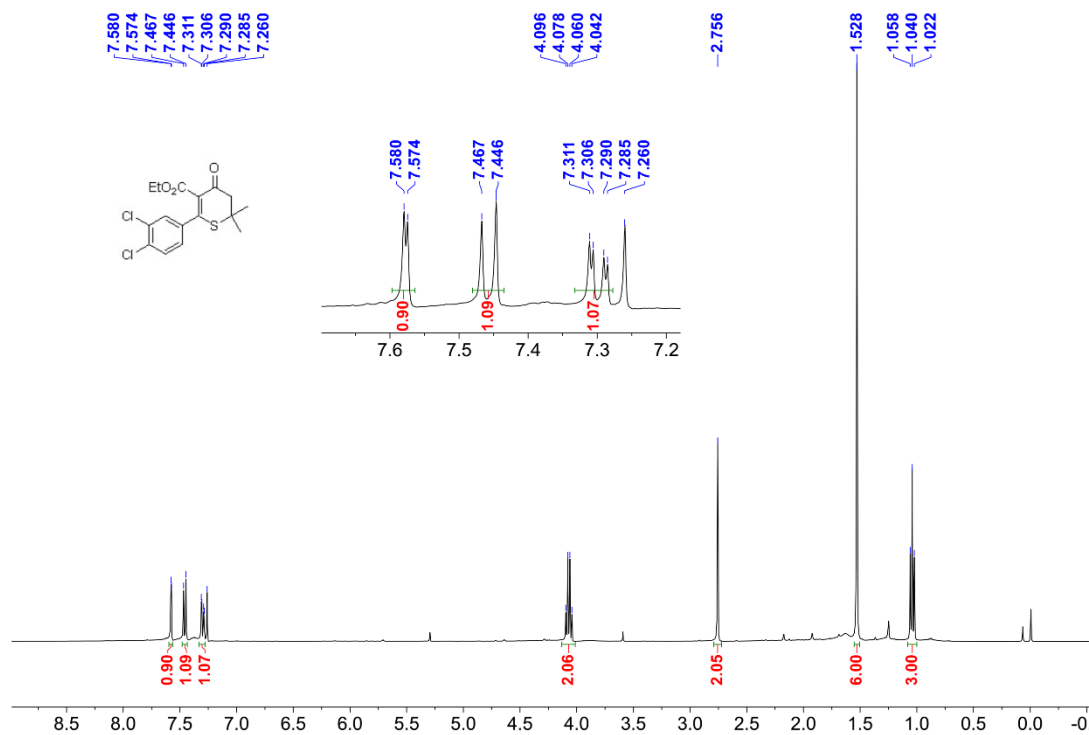

<sup>13</sup>C NMR{<sup>1</sup>H} (101 MHz, CDCl<sub>3</sub>)

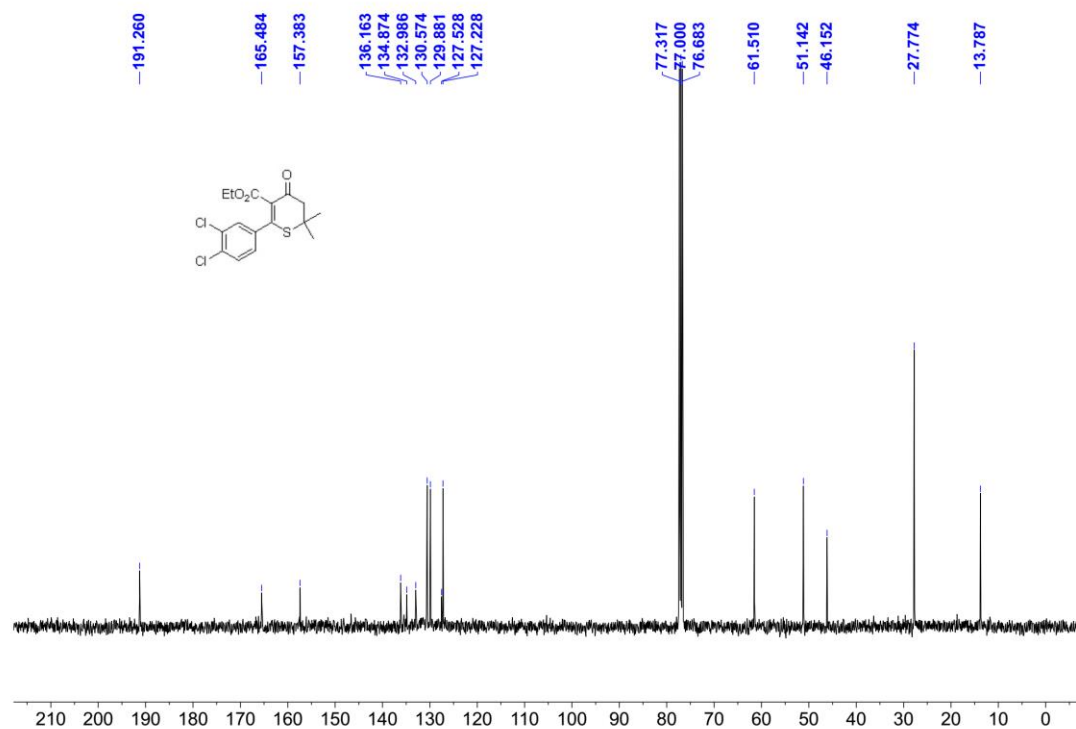

# HRMS

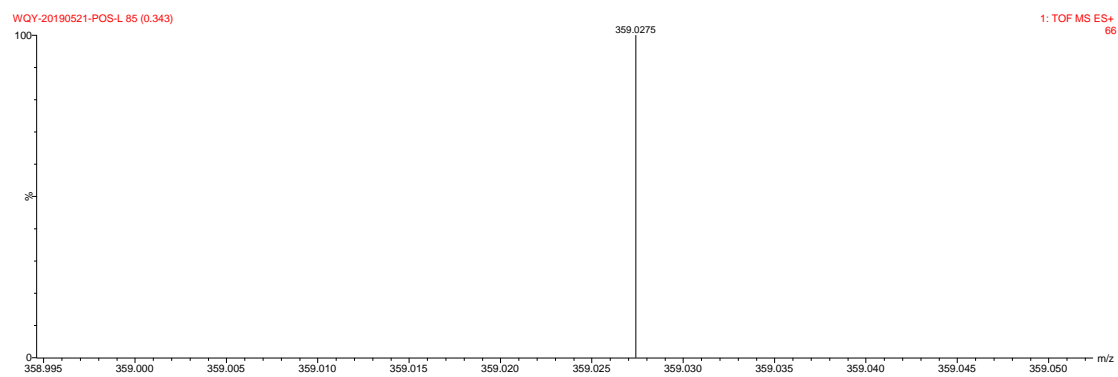

Ethyl 6-(4-iodophenyl)-2,2-dimethyl-4-oxo-3,4-dihydro-2H-thiopyran-5-carboxylate (**3ha**)

$^1\text{H}$  NMR (400 MHz,  $\text{CDCl}_3$ )

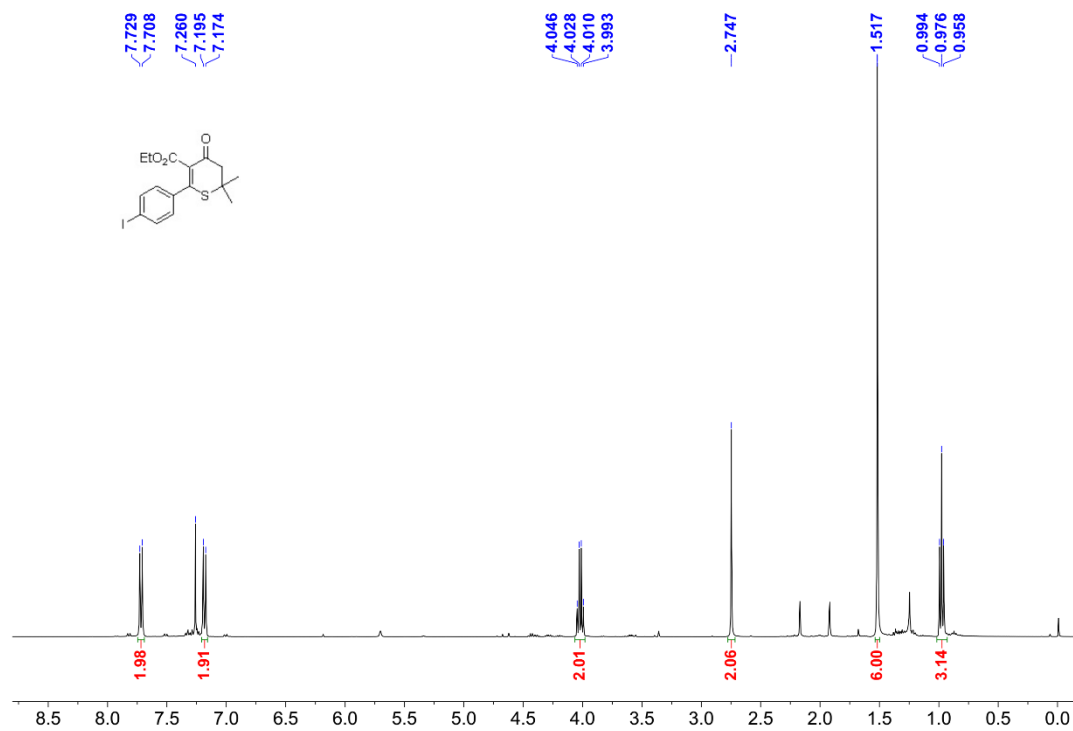

$^{13}\text{C}$  NMR{ $^1\text{H}$ } (101 MHz,  $\text{CDCl}_3$ )

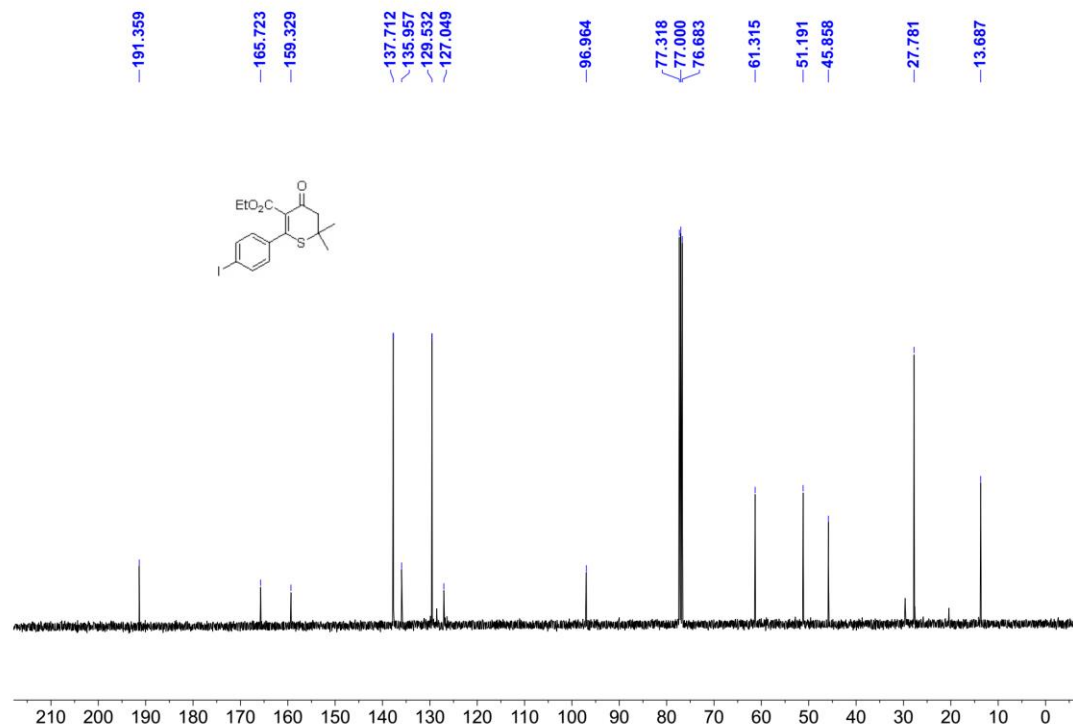

# HRMS

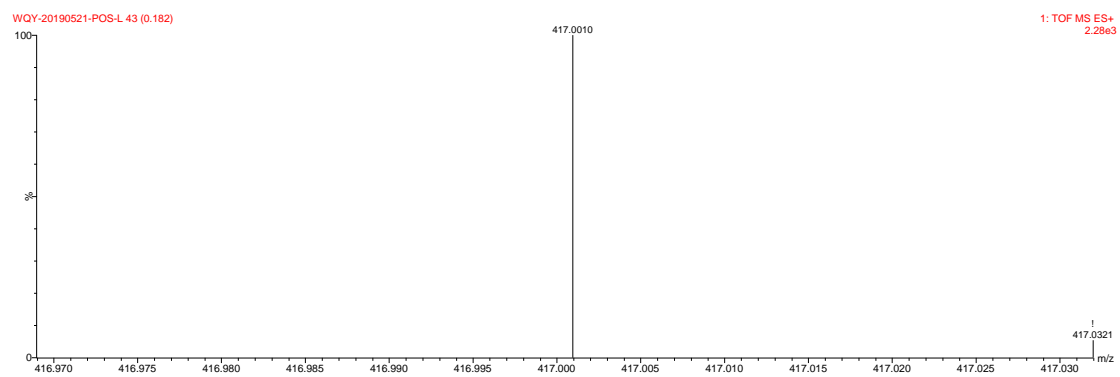

Ethyl 2,2-dimethyl-4-oxo-6-(4-(trifluoromethyl)phenyl)-3,4-dihydro-2H-thiopyran-5-carboxylate  
(3ia)

<sup>1</sup>H NMR (400 MHz, CDCl<sub>3</sub>)

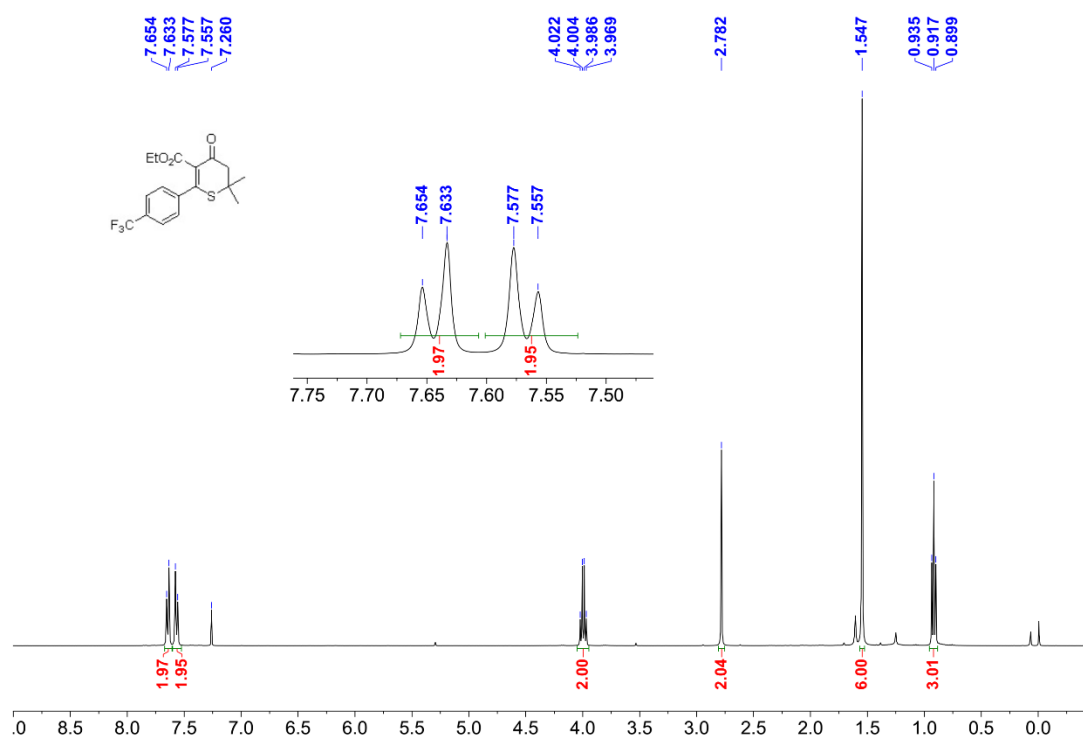

<sup>13</sup>C NMR{<sup>1</sup>H} (101 MHz, CDCl<sub>3</sub>)

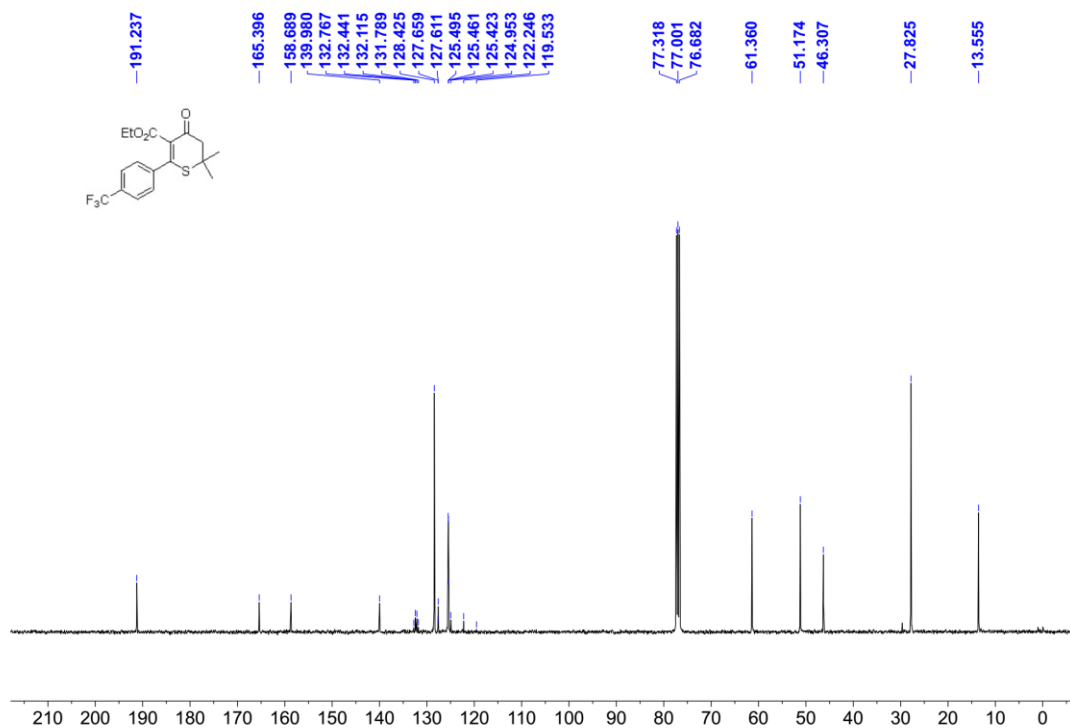

**$^{19}\text{F}$  NMR{ $^1\text{H}$  } (376 MHz,  $\text{CDCl}_3$ )**

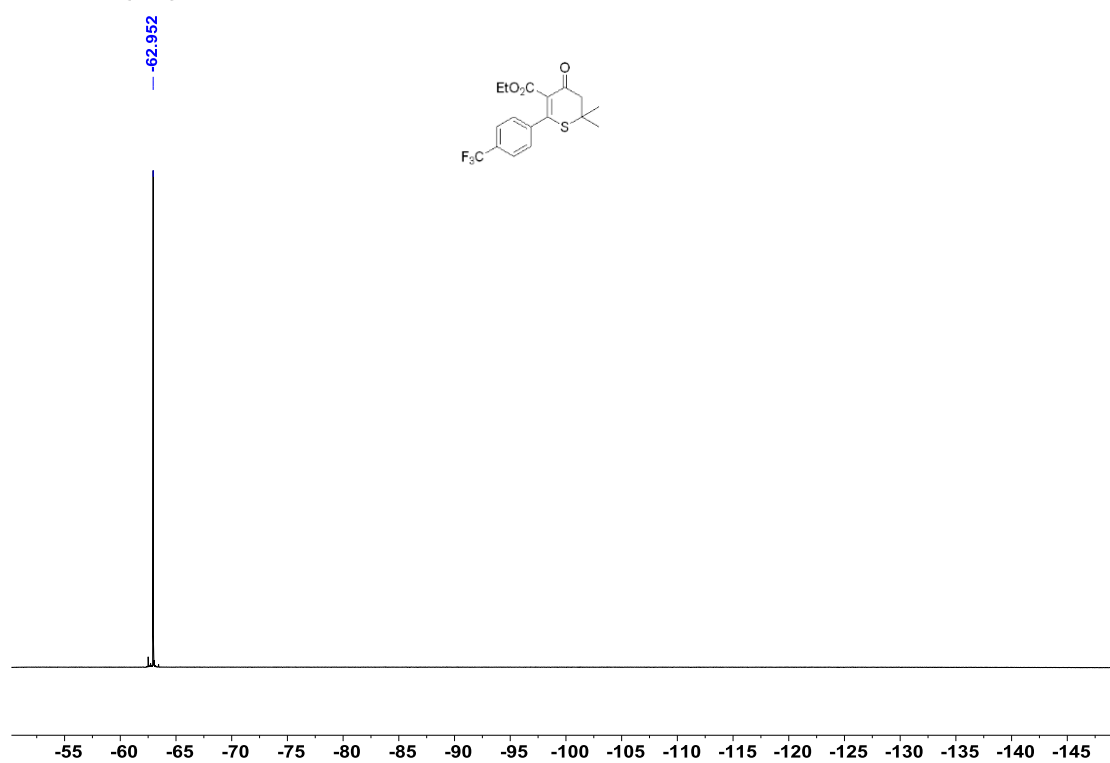

**HRMS**

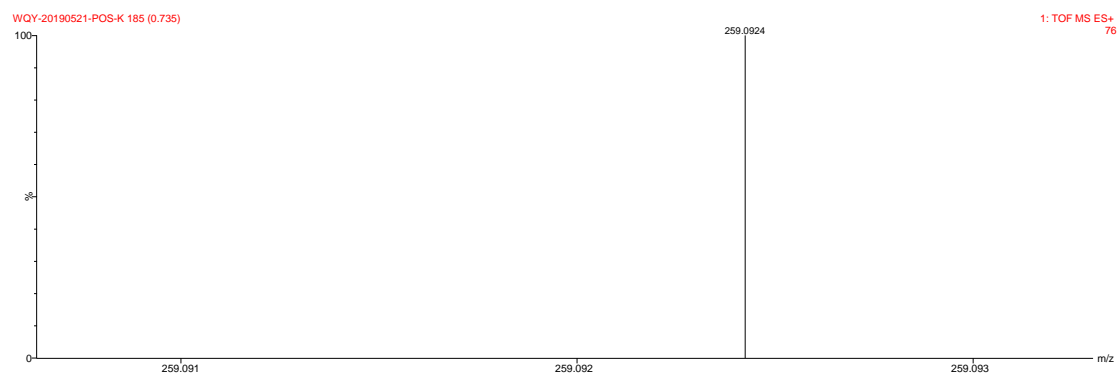

Ethyl 6-(4-cyanophenyl)-2,2-dimethyl-4-oxo-3,4-dihydro-2H-thiopyran-5-carboxylate (**3ja**)

$^1\text{H}$  NMR (400 MHz,  $\text{CDCl}_3$ )

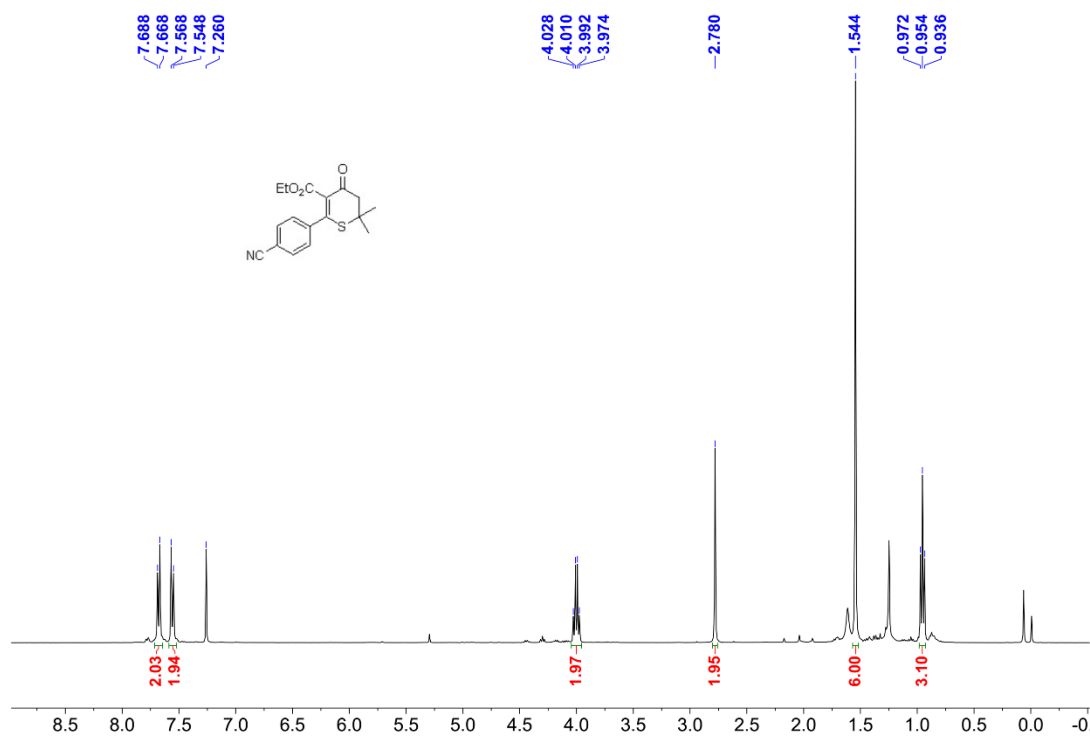

$^{13}\text{C}$  NMR{ $^1\text{H}$ } (101 MHz,  $\text{CDCl}_3$ )

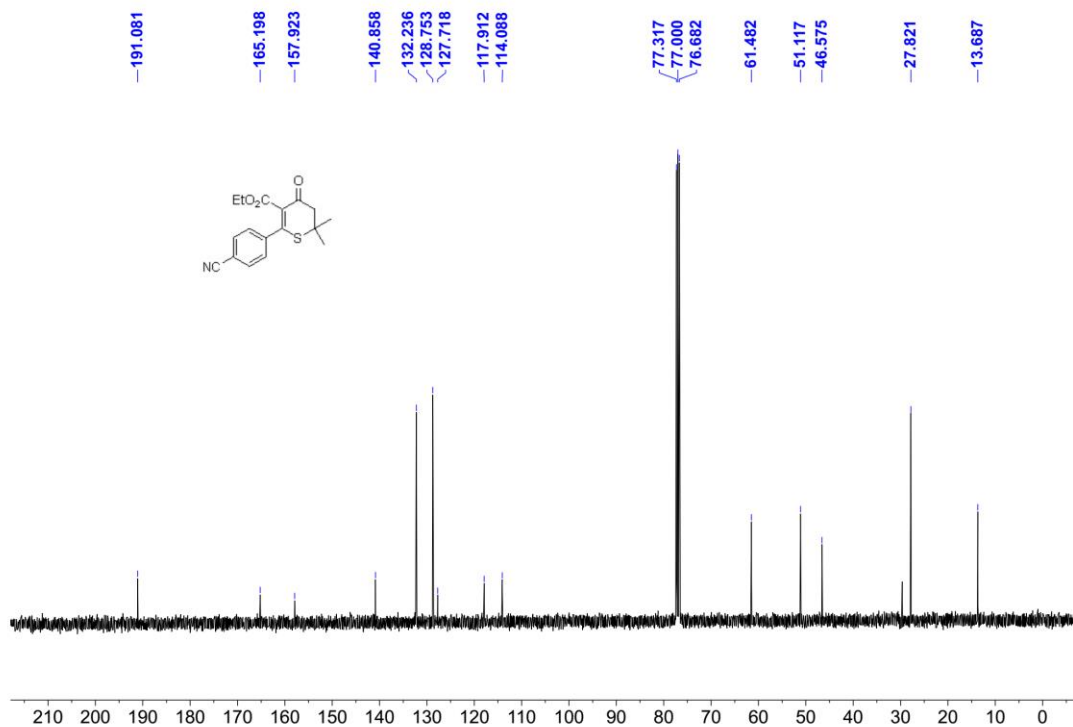



# HRMS

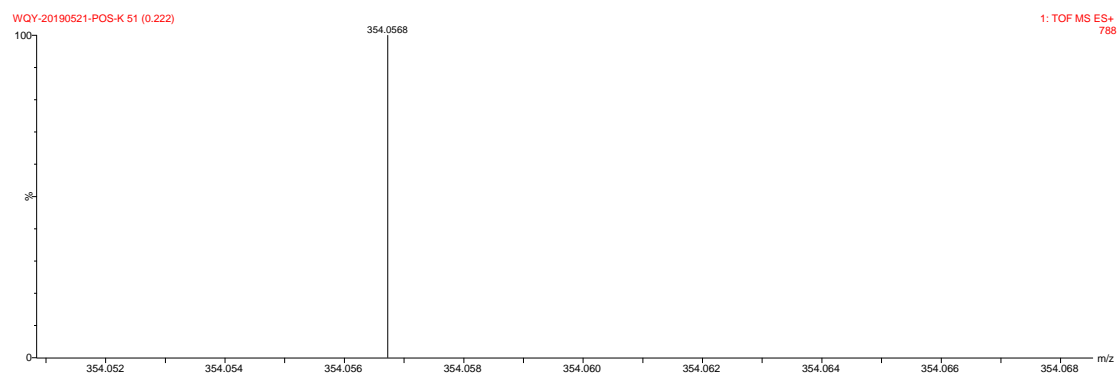

Ethyl 6-(furan-2-yl)-2,2-dimethyl-4-oxo-3,4-dihydro-2H-thiopyran-5-carboxylate (**3ka**)

<sup>1</sup>H NMR (400 MHz, CDCl<sub>3</sub>)

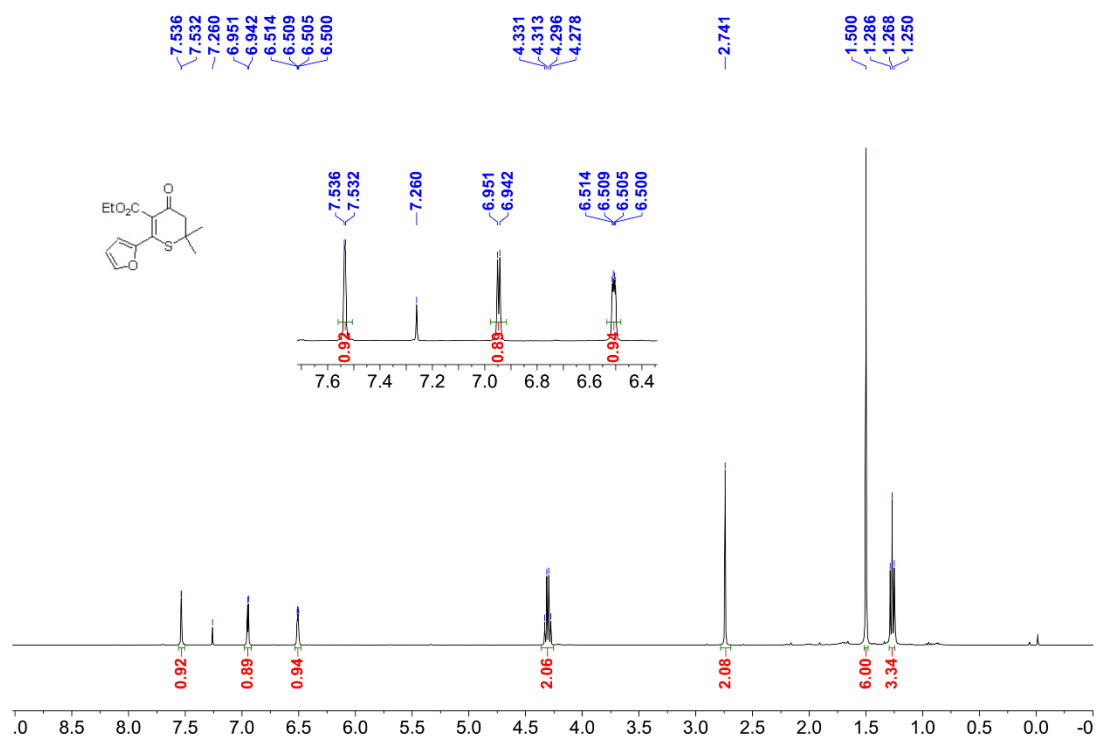

<sup>13</sup>C NMR{<sup>1</sup>H} (101 MHz, CDCl<sub>3</sub>)

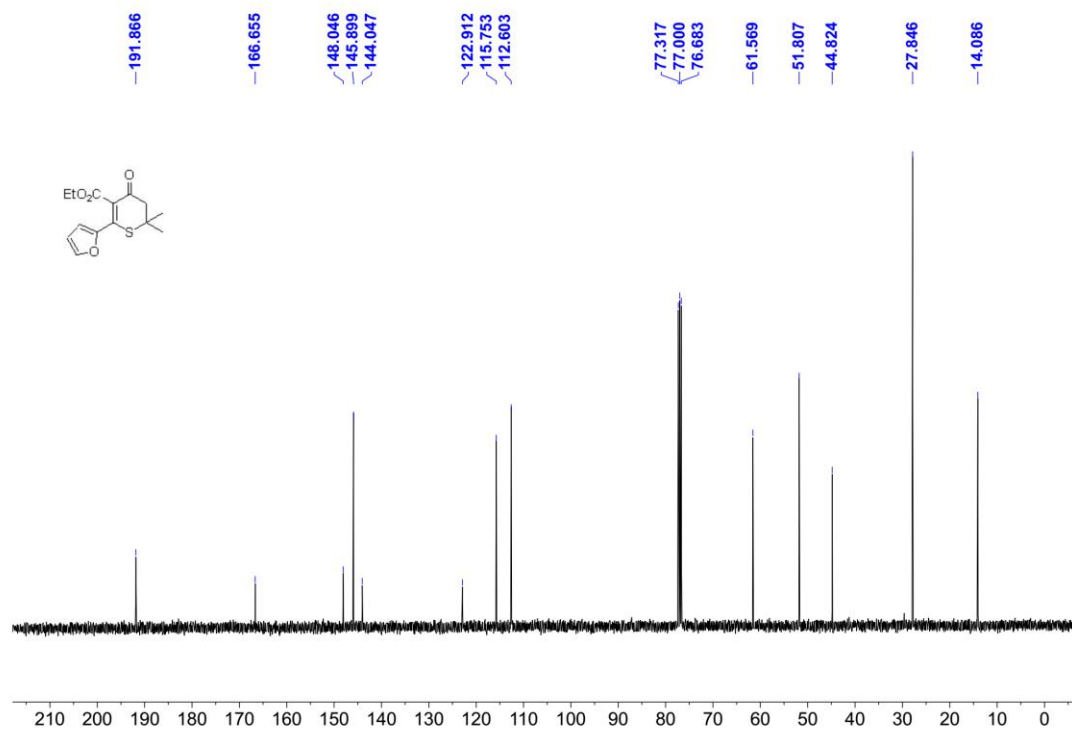

# HRMS

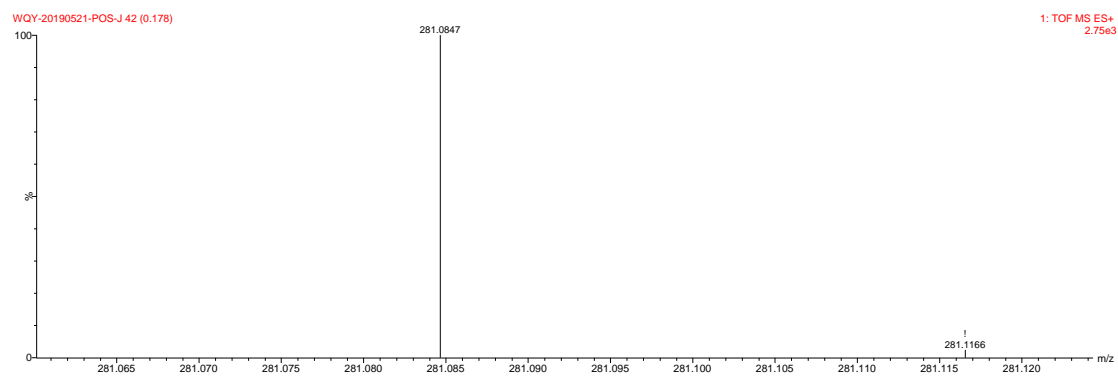

Ethyl 2,2-dimethyl-4-oxo-6-(thiophen-2-yl)-3,4-dihydro-2H-thiopyran-5-carboxylate (**3la**)

$^1\text{H}$  NMR (400 MHz,  $\text{CDCl}_3$ )

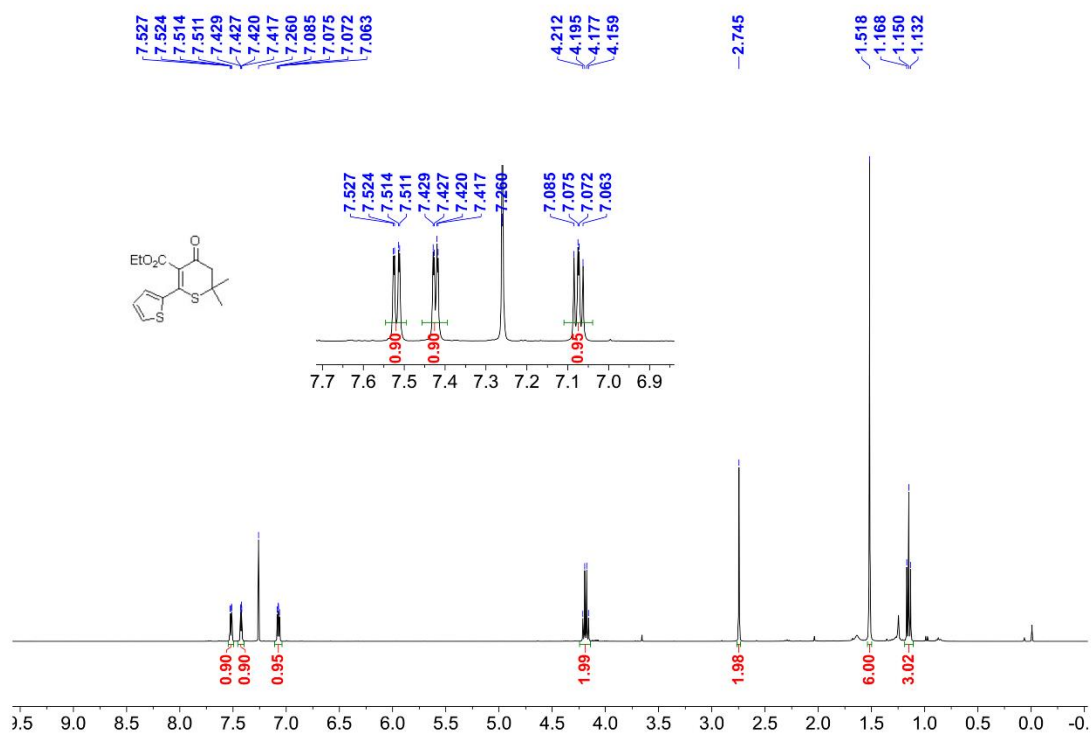

$^{13}\text{C}$  NMR ( $^1\text{H}$ ) (101 MHz,  $\text{CDCl}_3$ )

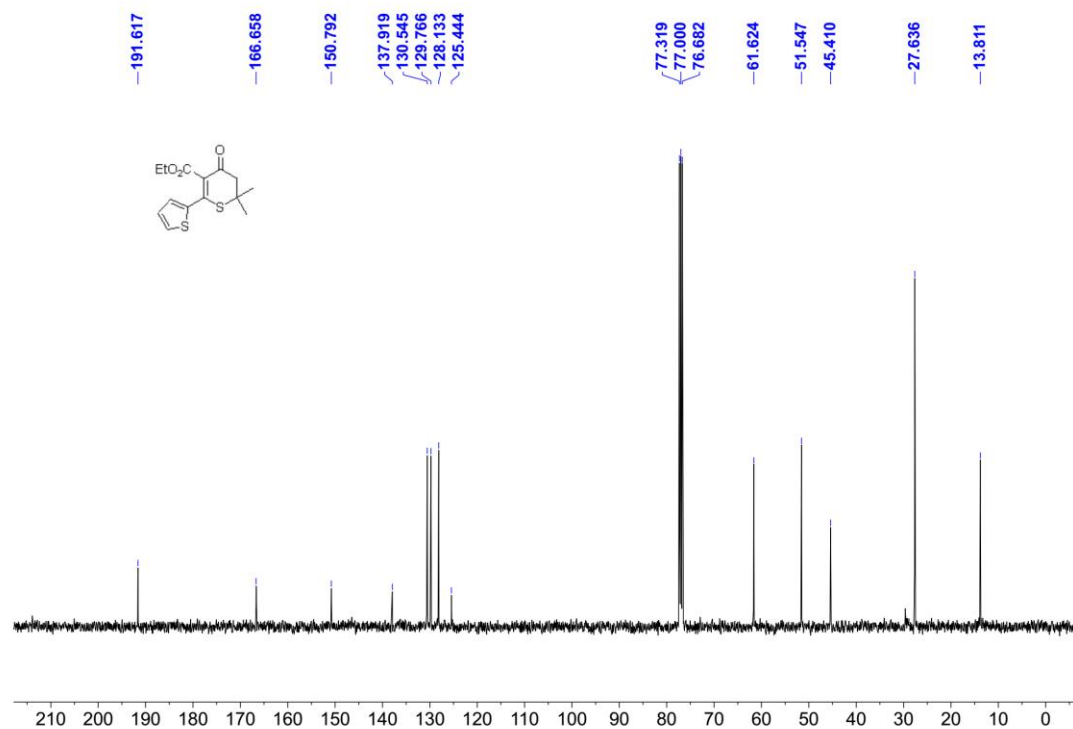

# HRMS

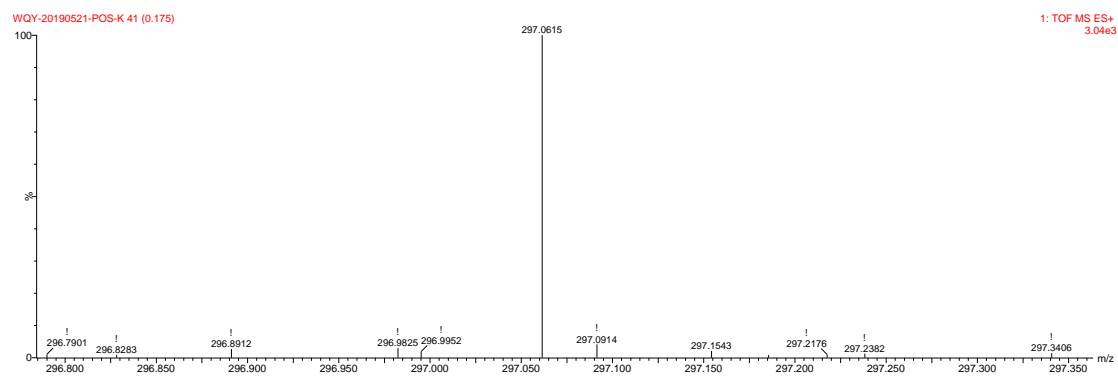

Ethyl 2,2-dimethyl-6-(naphthalen-2-yl)-4-oxo-3,4-dihydro-2H-thiopyran-5-carboxylate (**3ma**)  
<sup>1</sup>H NMR (400 MHz, CDCl<sub>3</sub>)

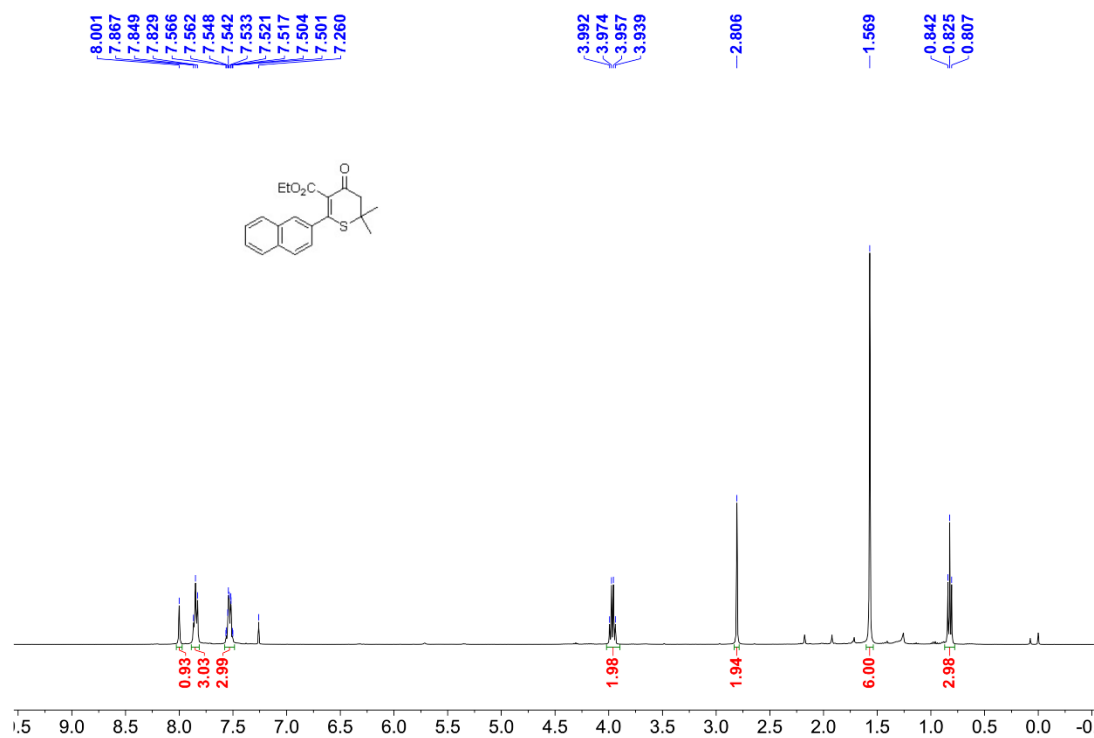

<sup>13</sup>C NMR{<sup>1</sup>H} (101 MHz, CDCl<sub>3</sub>)

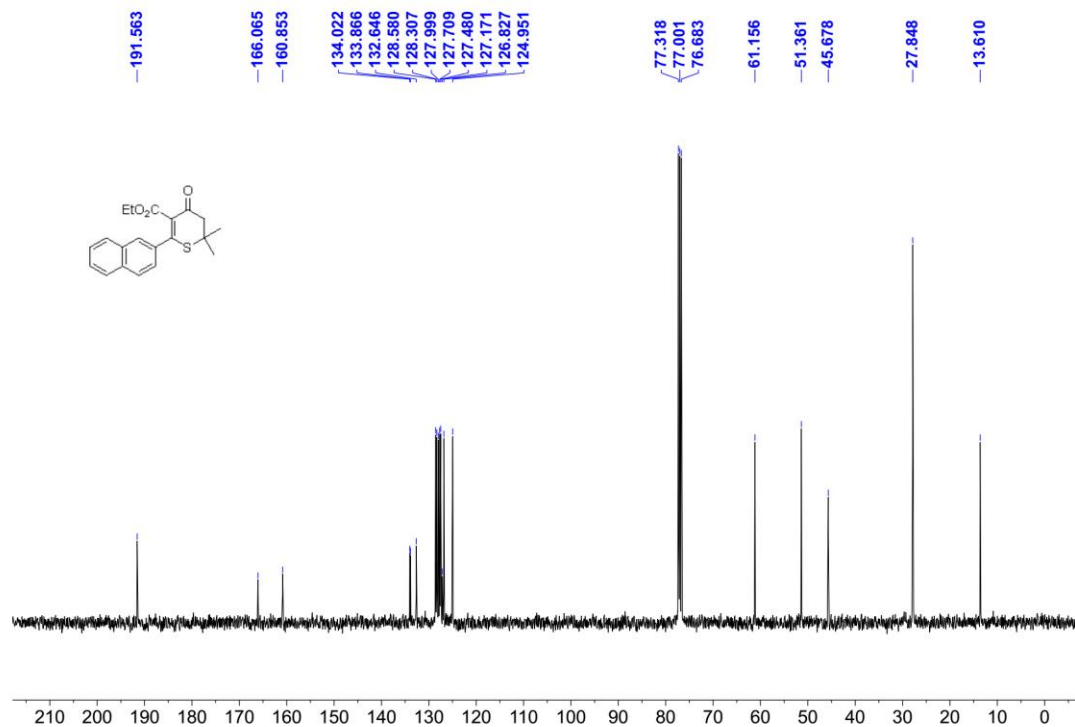

# HRMS

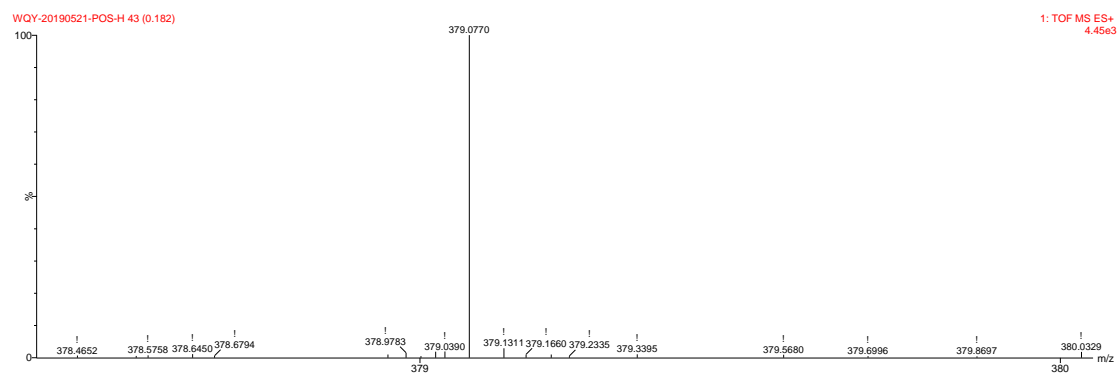

**Ethyl (10R,13S)-10,13-Dimethyl-4'-oxo-6'-phenyl-1,2,3',4',7,8,9,10,11,12,13,14,15,16-tetradecahydrospiro[cyclopenta[a]phenanthrene-17,2'-thiopyran]-5'-carboxylate (13)**  
<sup>1</sup>H MNR (400 MHz, CDCl<sub>3</sub>)

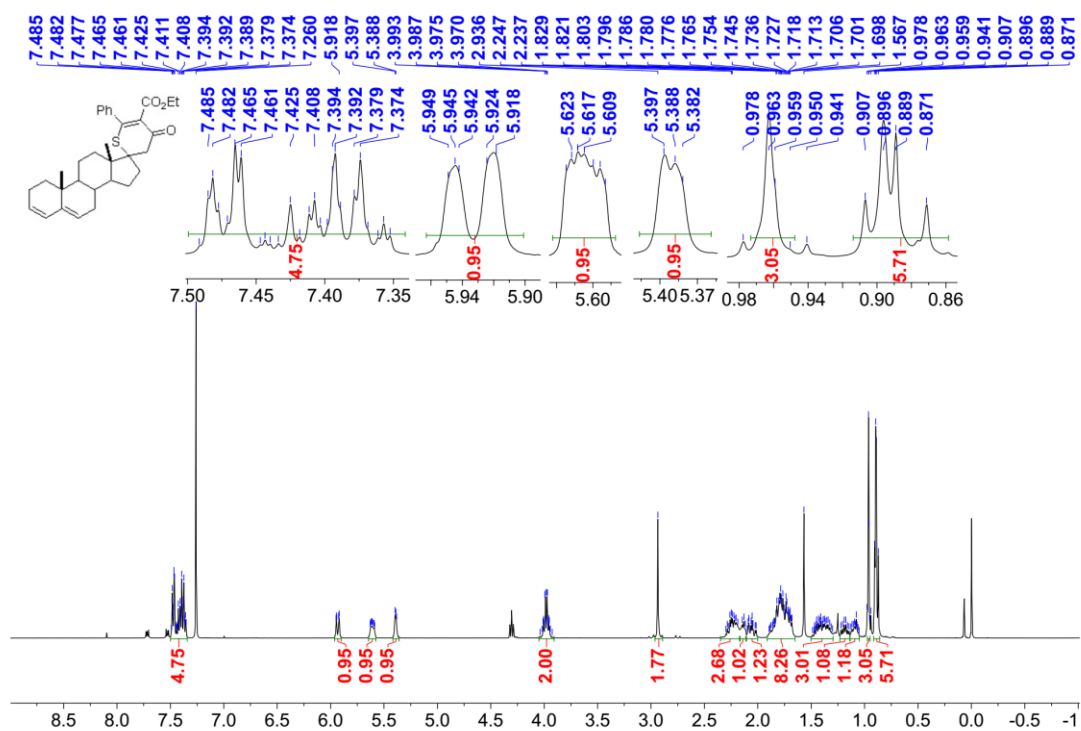

**<sup>13</sup>C NMR{<sup>1</sup>H} (101 MHz, CDCl<sub>3</sub>)**

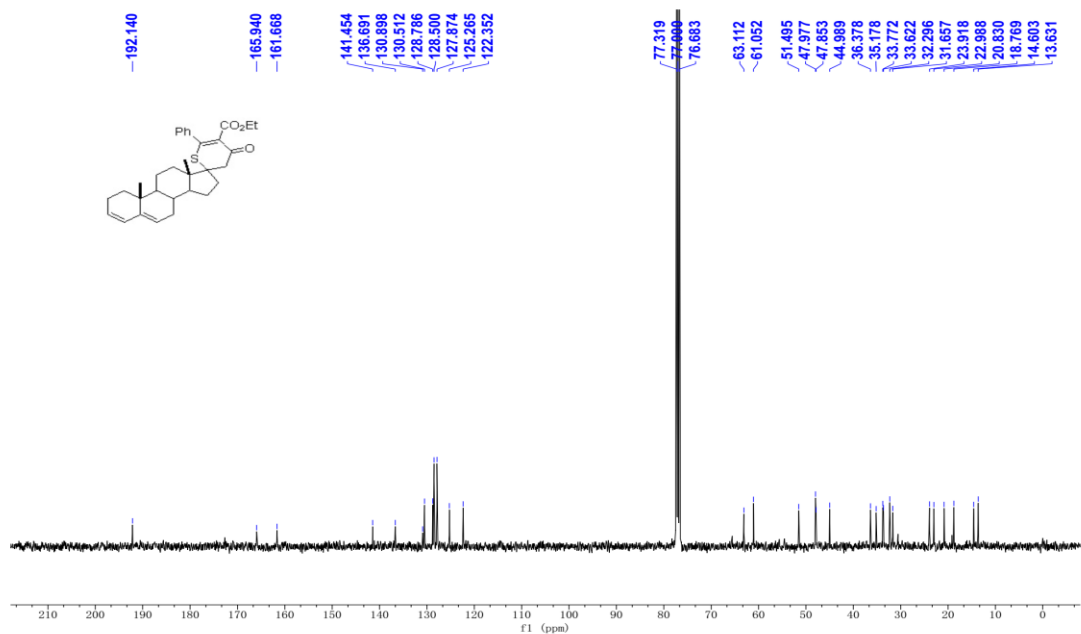



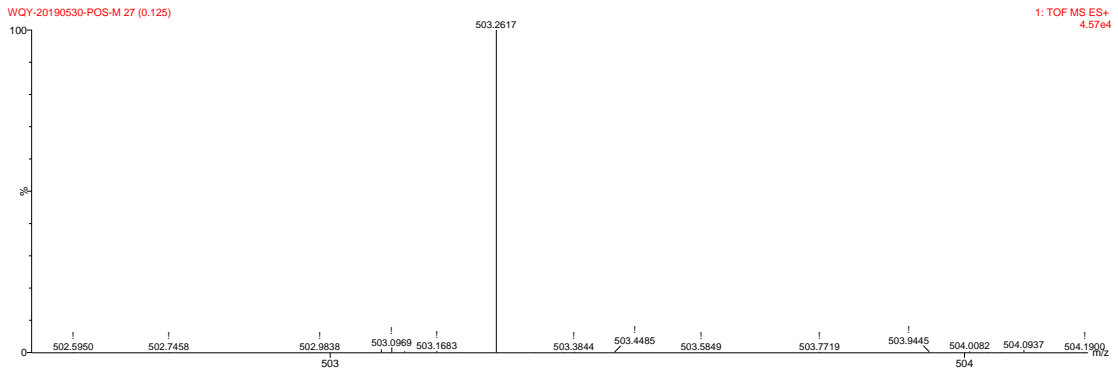

# Diethyl 2,3-Dibenzoylbut-2-enedioate (4)

<sup>1</sup>H NMR (400 MHz, CDCl<sub>3</sub>)

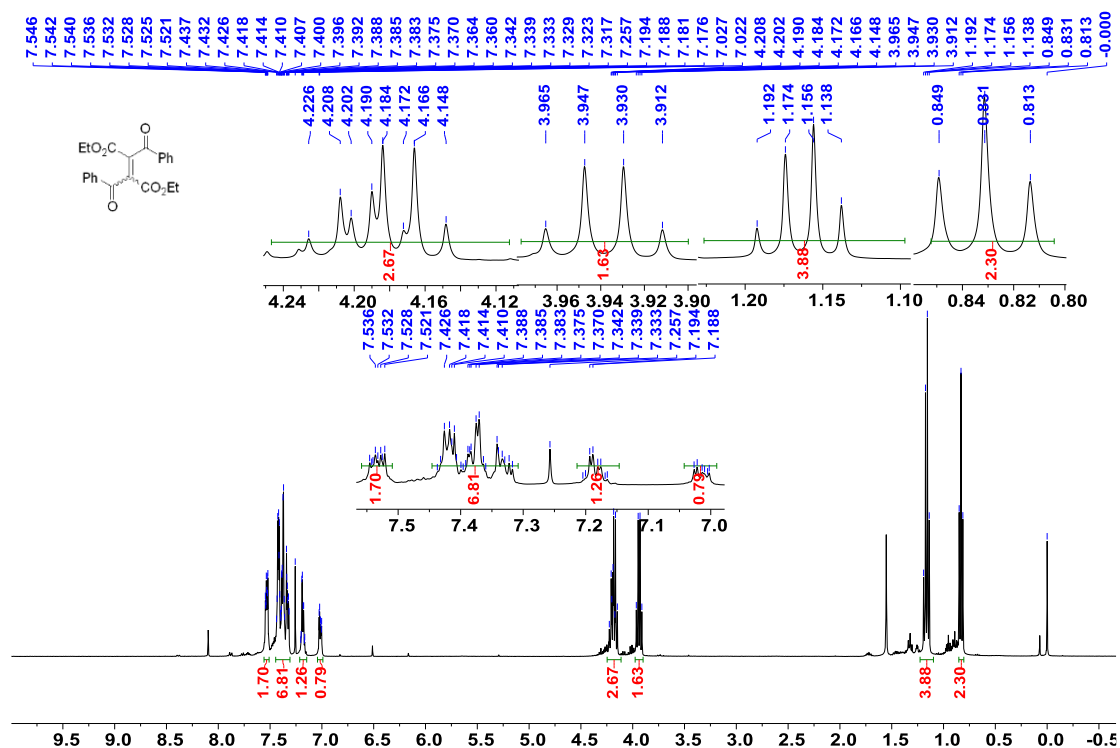

<sup>13</sup>C NMR{<sup>1</sup>H} (101 MHz, CDCl<sub>3</sub>)

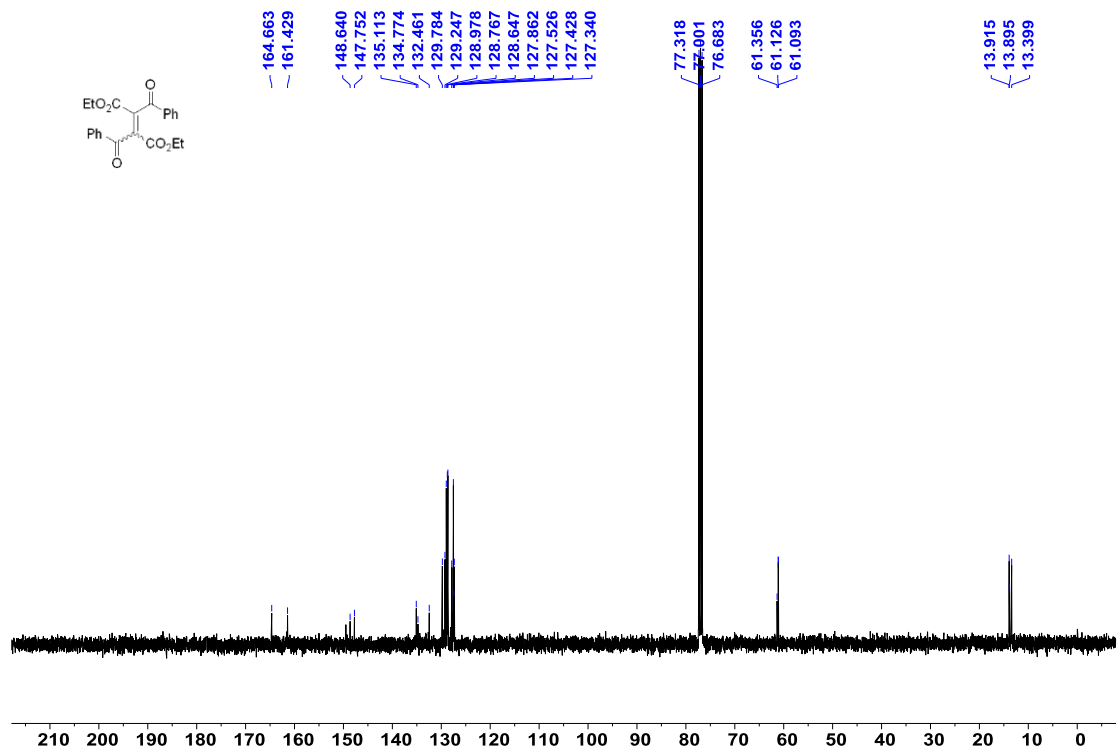

**Phosphine sulfide (5)**  
 $^1\text{H}$  NMR (400 MHz,  $\text{CDCl}_3$ )

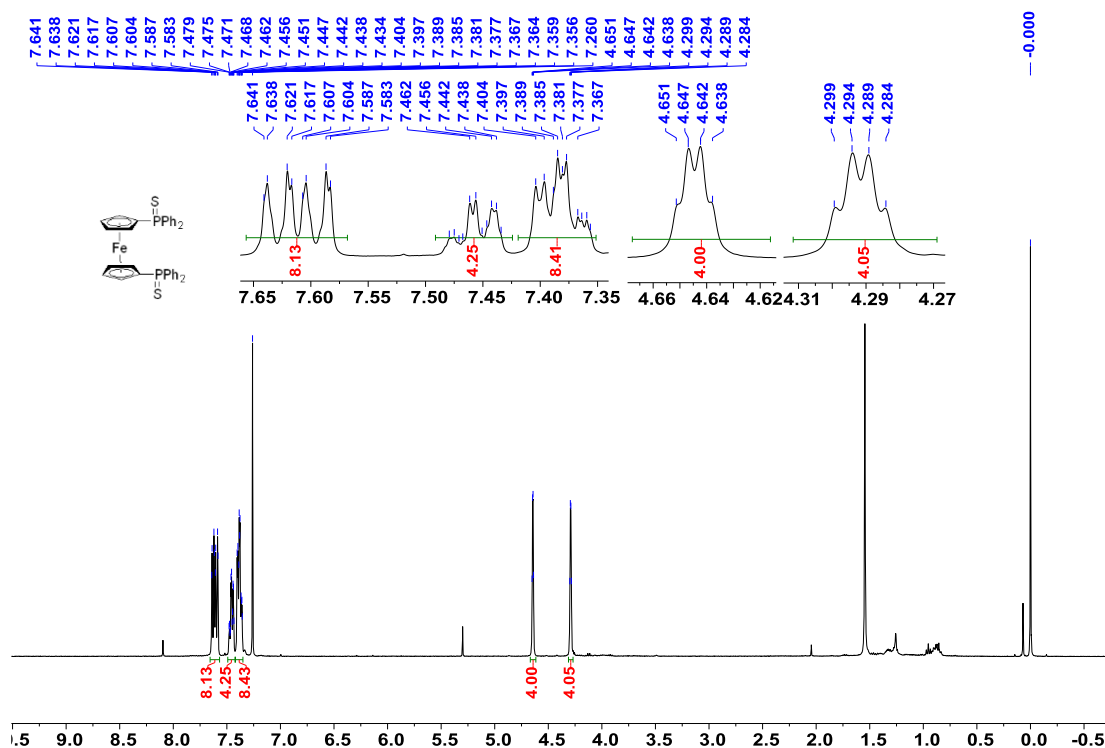

$^{13}\text{C}$  NMR ( $^1\text{H}$ ) (101 MHz,  $\text{CDCl}_3$ )

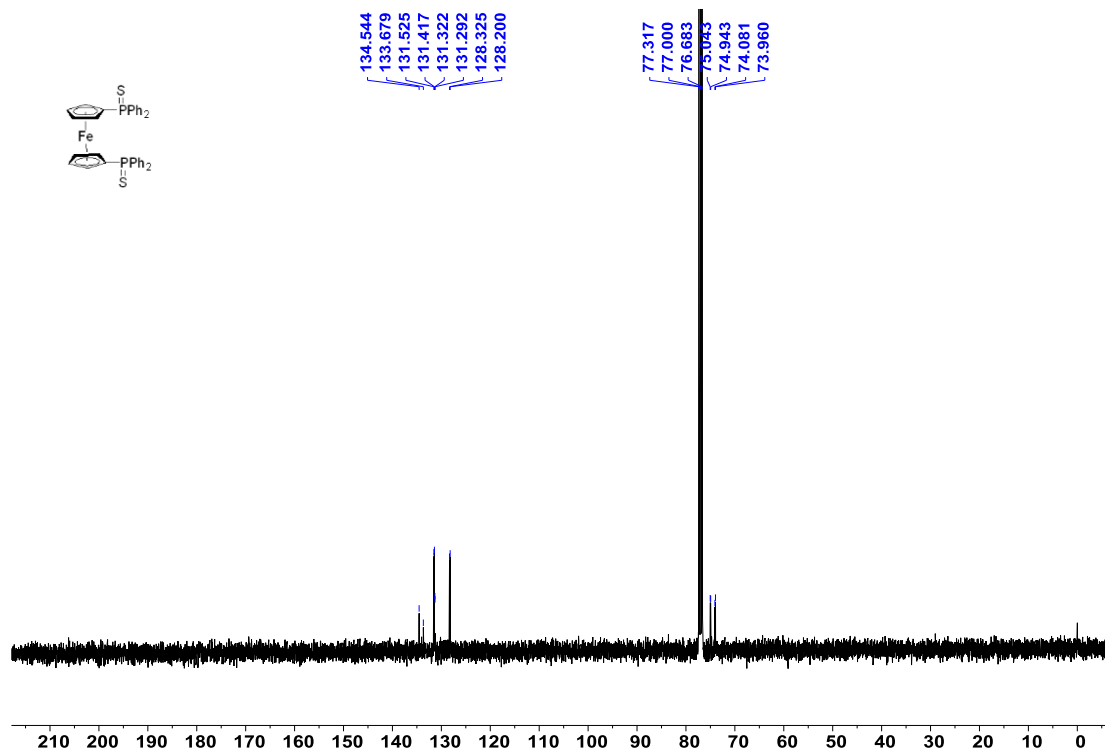

$^{31}\text{P}$  NMR ( $^1\text{H}$ ) (162 MHz,  $\text{CDCl}_3$ )

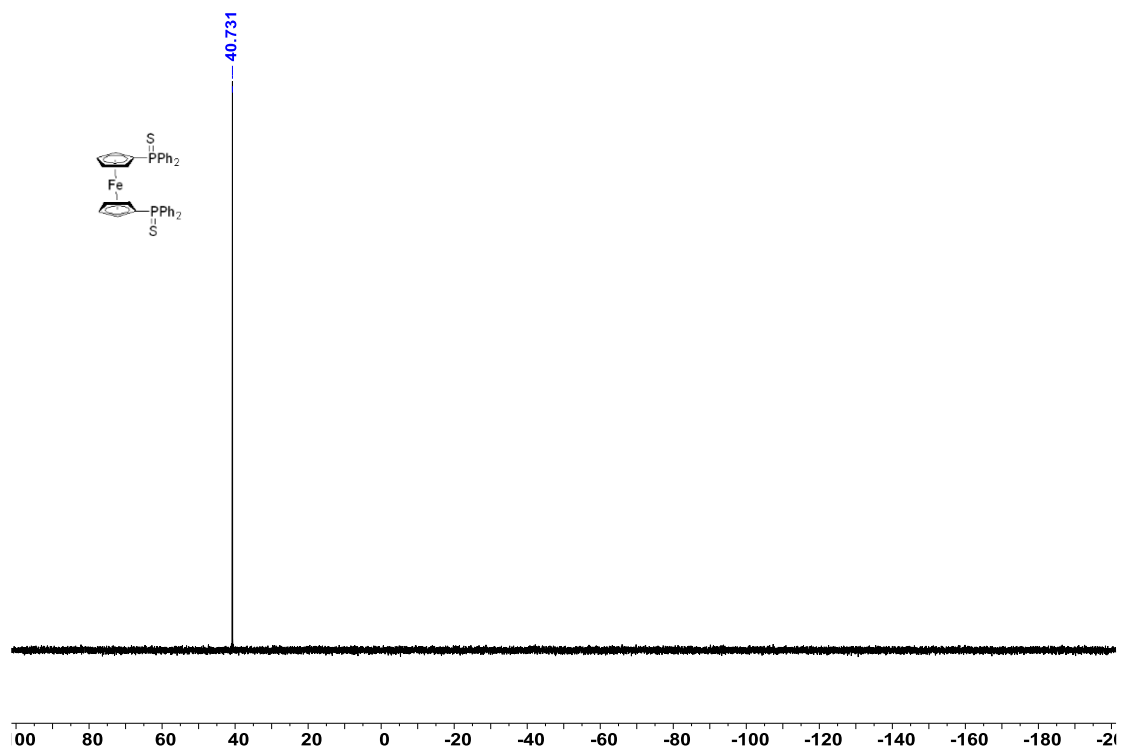

2-vinylnaphthalene (6)  
<sup>1</sup>H MNR (400 MHz, CDCl<sub>3</sub>)

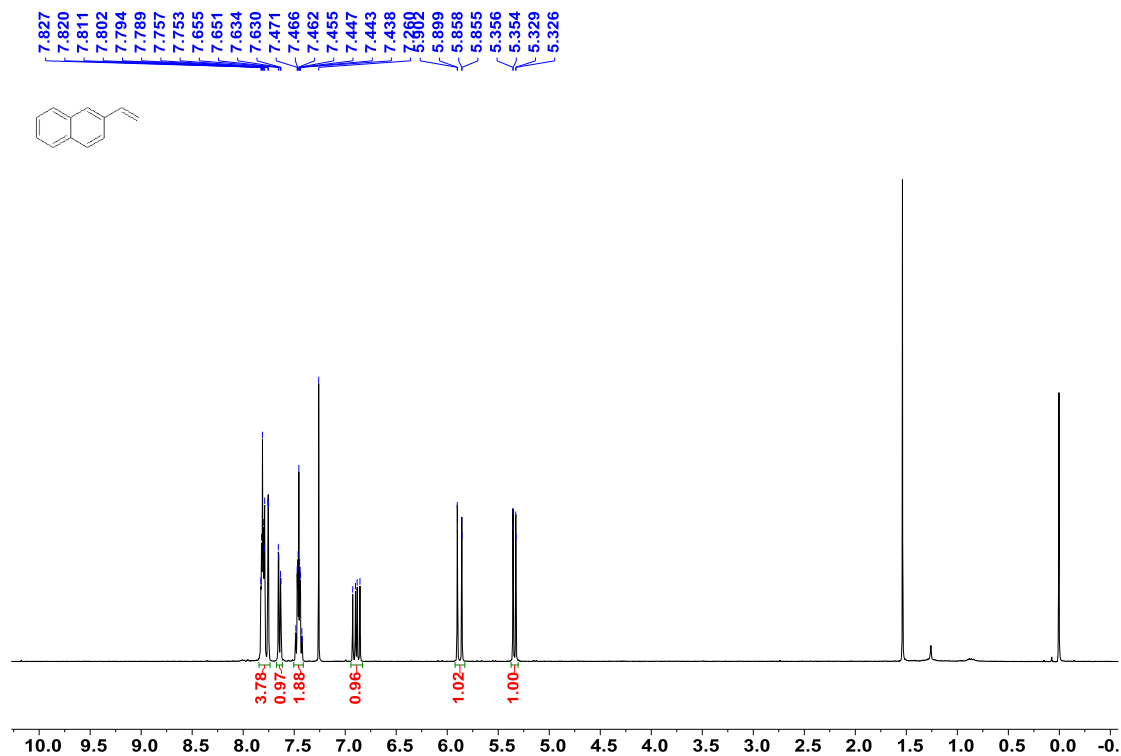

<sup>13</sup>C NMR{<sup>1</sup>H} (101 MHz, CDCl<sub>3</sub>)

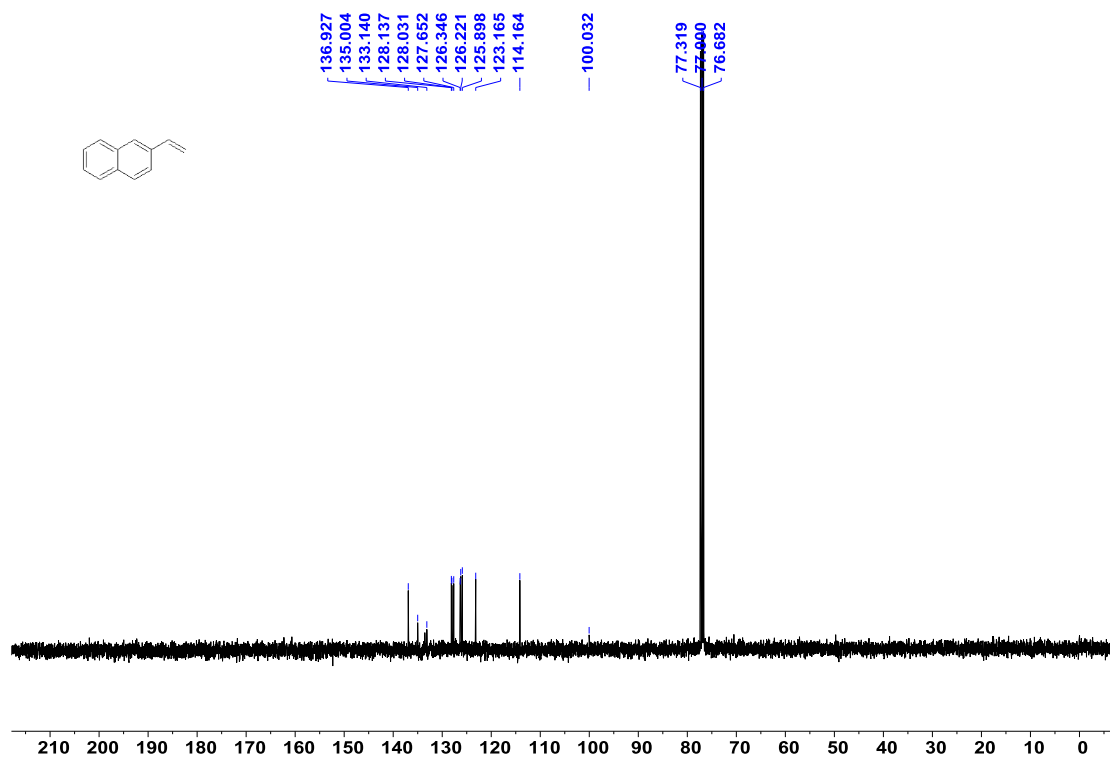

## 14. Copies of NMR Spectra of the Crude Reaction Mixtures in KIE Studies

Reaction 1

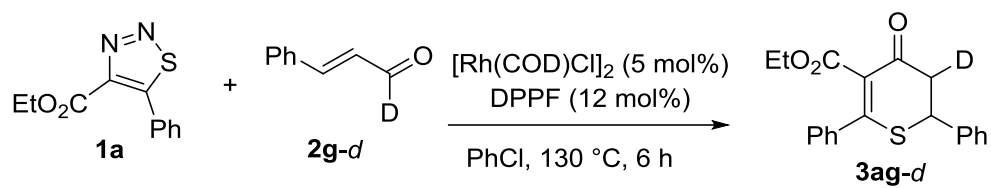

Reaction 2

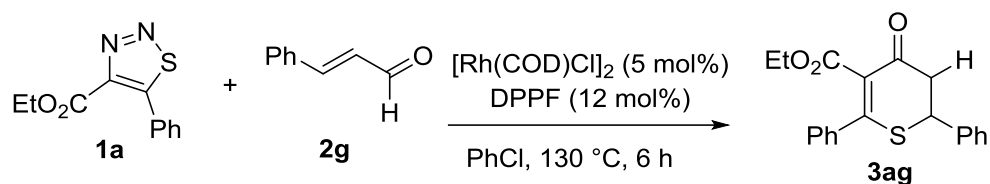

Reaction 1 (5 min)

$^1\text{H NMR}$  (400 MHz,  $\text{CDCl}_3$ )

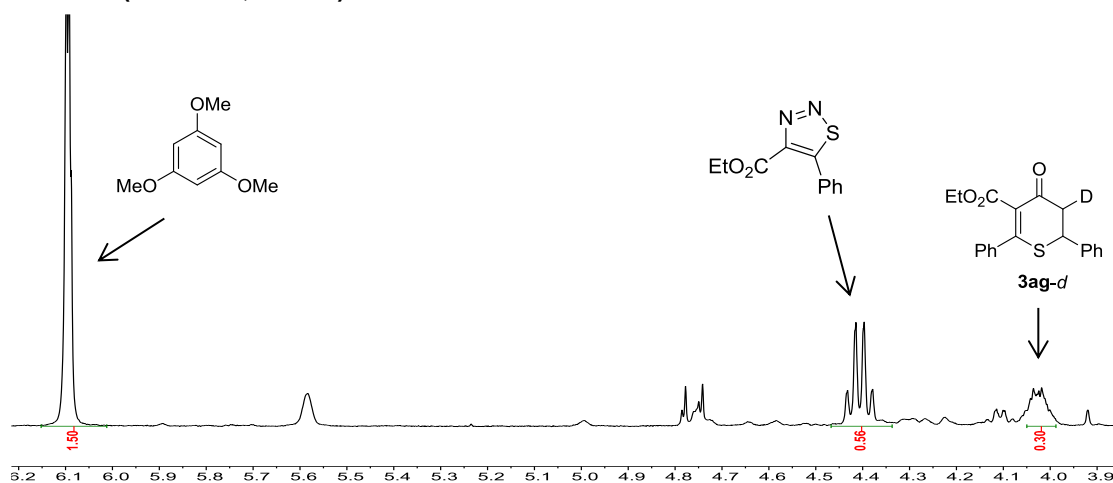

Reaction 1 (10 min)

$^1\text{H NMR}$  (400 MHz,  $\text{CDCl}_3$ )

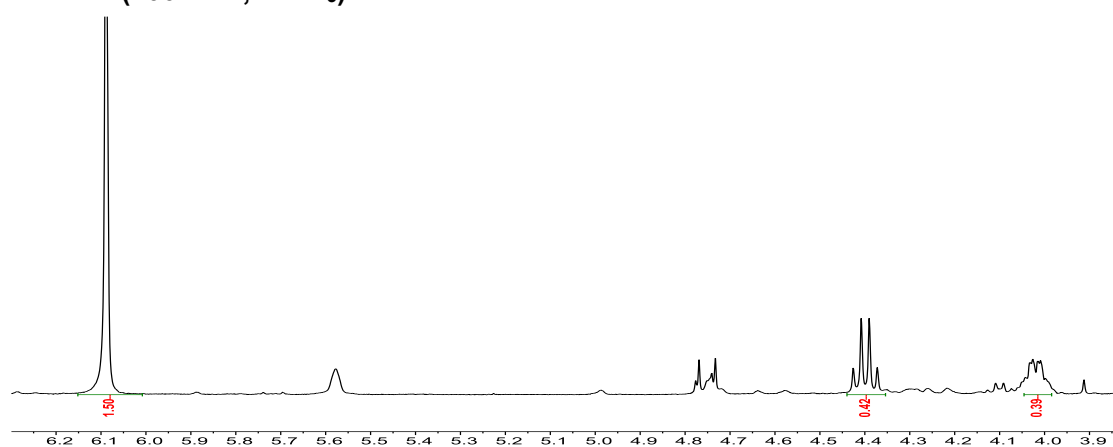

**Reaction 1 (15 min)**  
**<sup>1</sup>H MNR (400 MHz, CDCl<sub>3</sub>)**

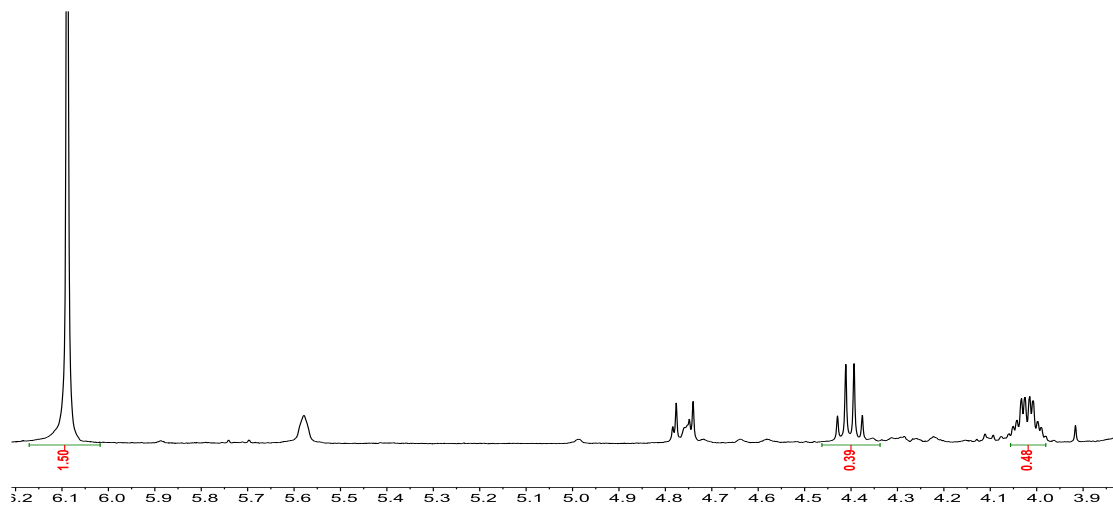

**Reaction 1 (20 min)**  
**<sup>1</sup>H MNR (400 MHz, CDCl<sub>3</sub>)**

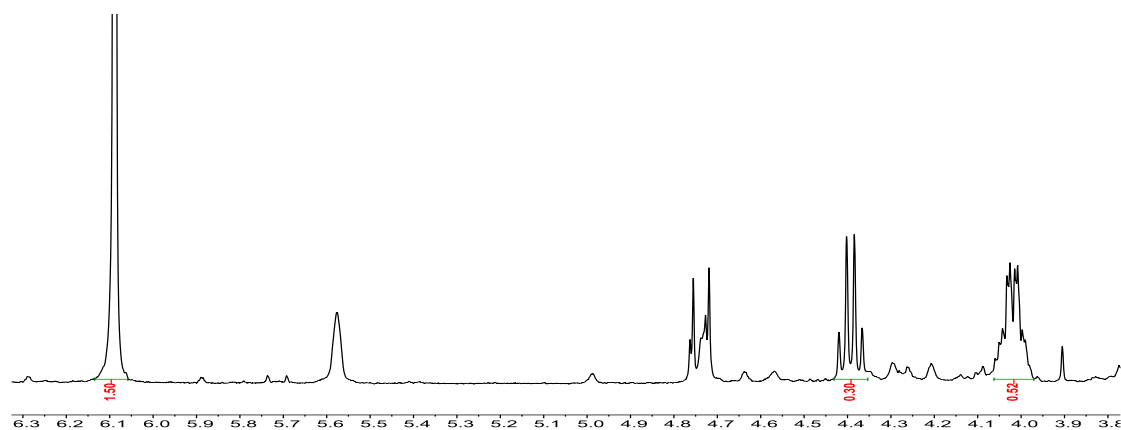

**Reaction 1 (30 min)**  
**<sup>1</sup>H MNR (400 MHz, CDCl<sub>3</sub>)**

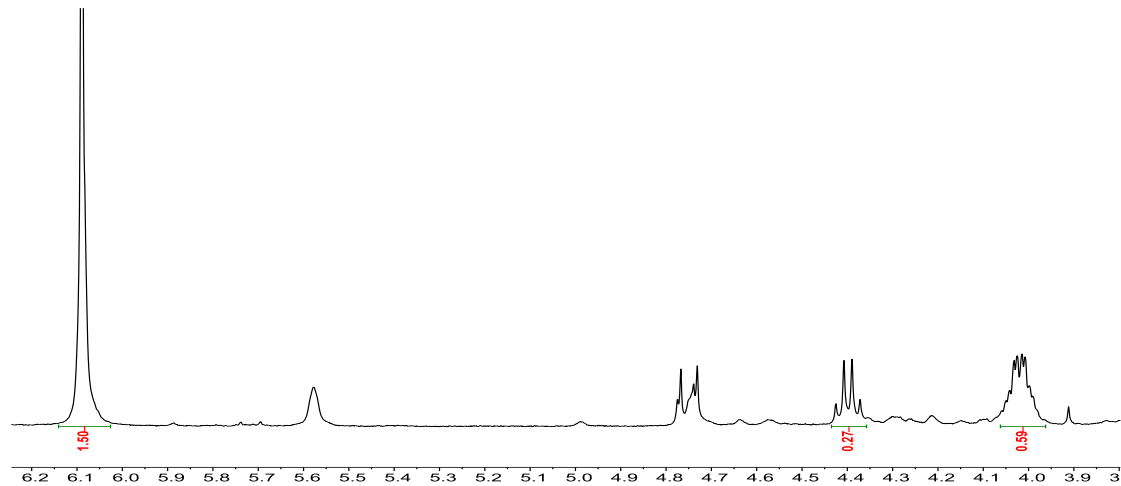

**Reaction 1 (40 min)**  
**<sup>1</sup>H MNR (400 MHz, CDCl<sub>3</sub>)**

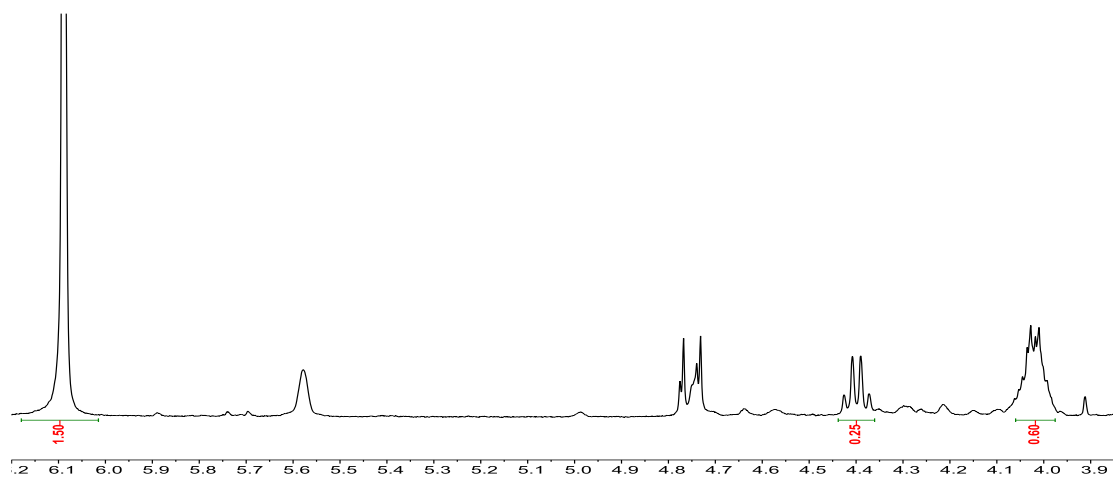

**Reaction 1 (50 min)**  
**<sup>1</sup>H MNR (400 MHz, CDCl<sub>3</sub>)**

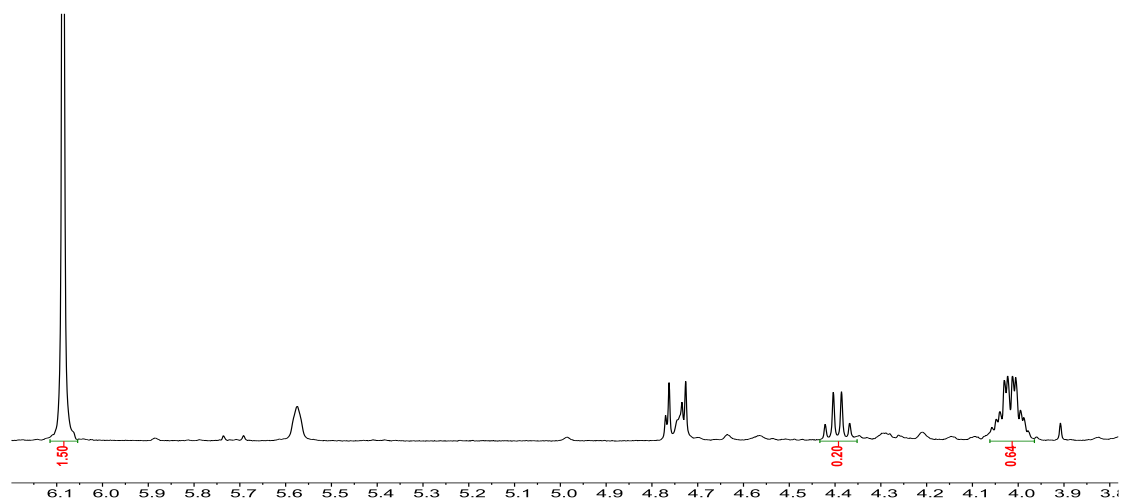

**Reaction 1 (60 min)**  
**<sup>1</sup>H MNR (400 MHz, CDCl<sub>3</sub>)**

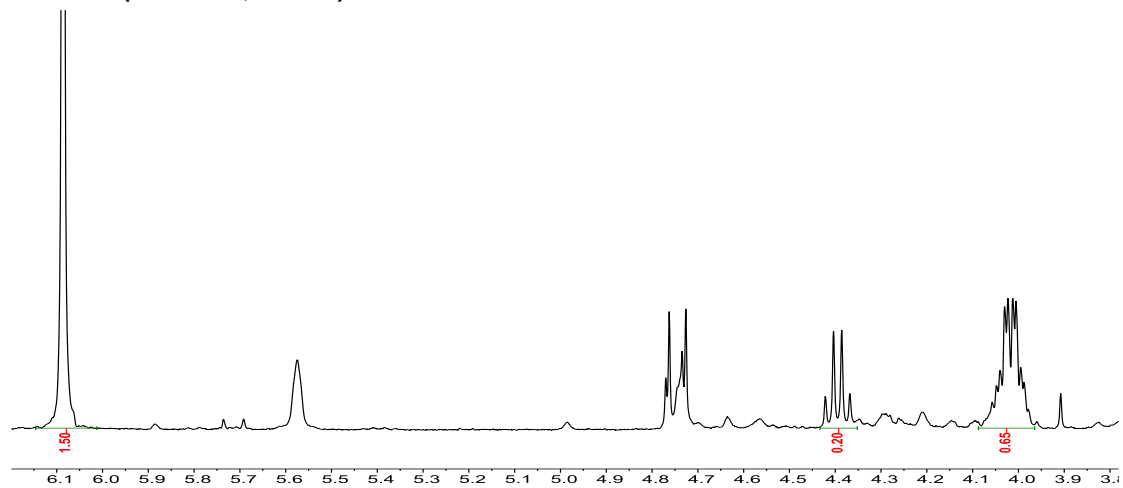



**Reaction 2 (5 min)**  
**<sup>1</sup>H MNR (400 MHz, CDCl<sub>3</sub>)**

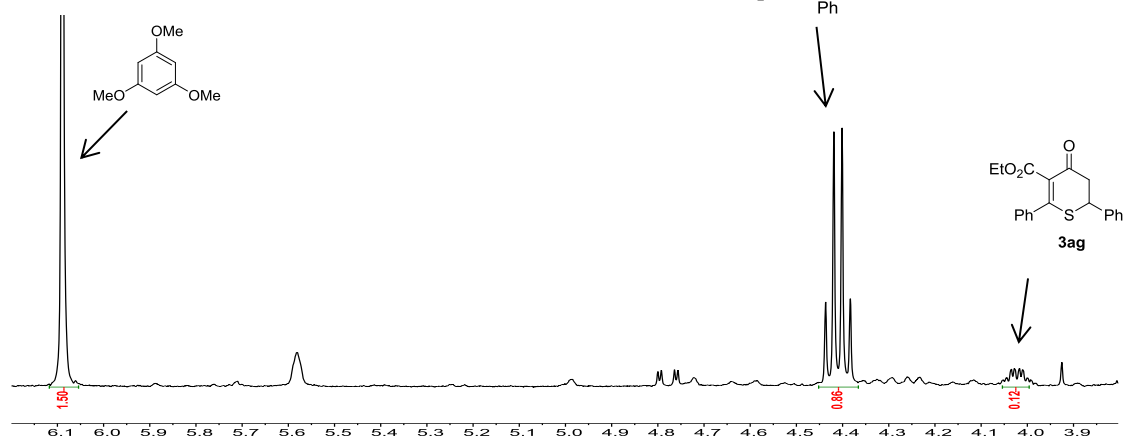

**Reaction 2 (10 min)**  
**<sup>1</sup>H MNR (400 MHz, CDCl<sub>3</sub>)**

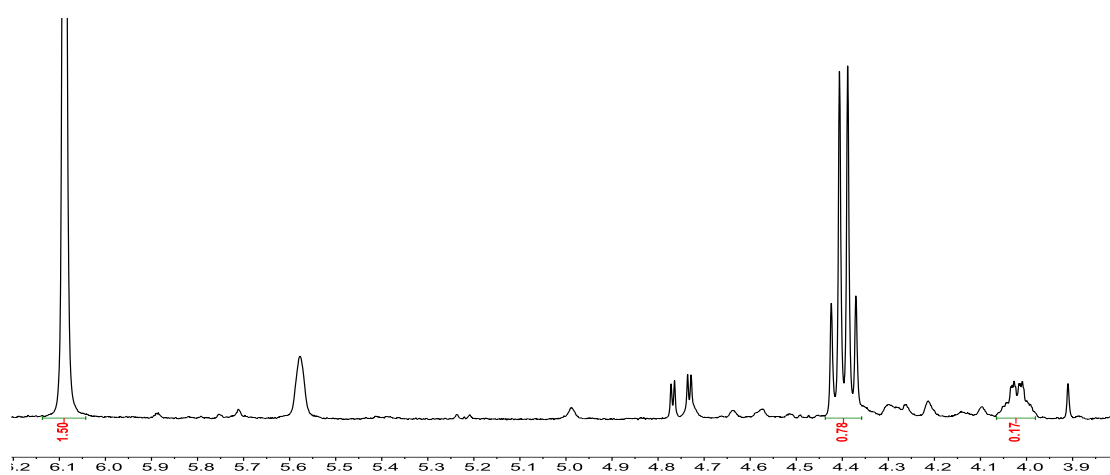

**Reaction 2 (15 min)**  
**<sup>1</sup>H MNR (400 MHz, CDCl<sub>3</sub>)**

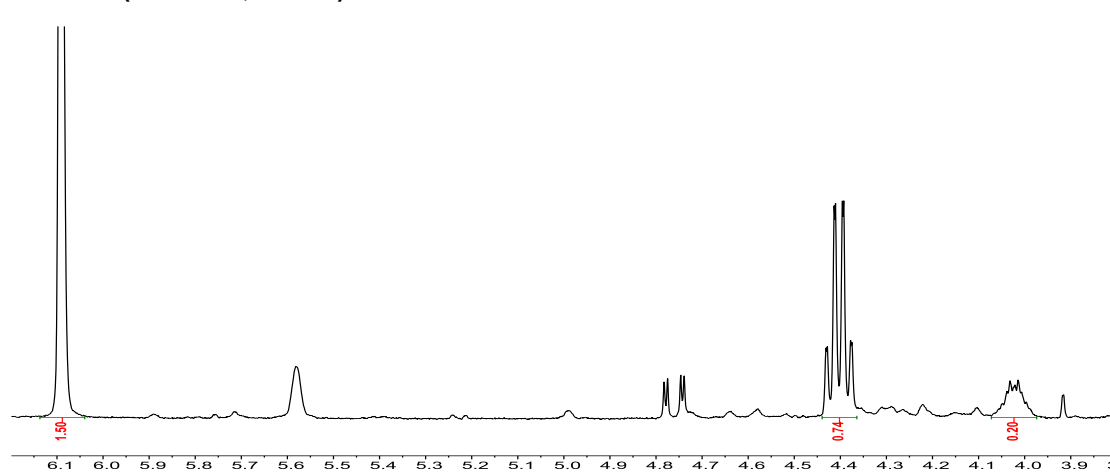

**Reaction 2 (20 min)**  
**<sup>1</sup>H MNR (400 MHz, CDCl<sub>3</sub>)**

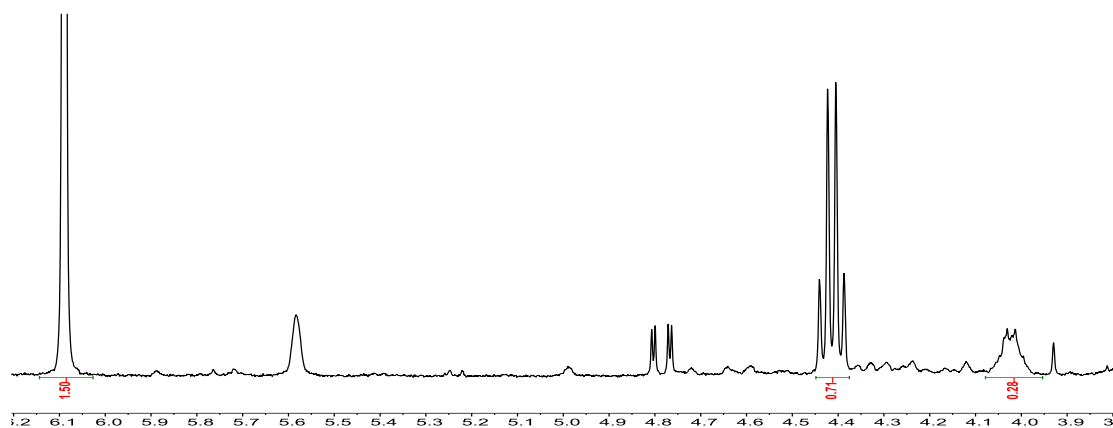

**Reaction 2 (30 min)**  
**<sup>1</sup>H MNR (400 MHz, CDCl<sub>3</sub>)**

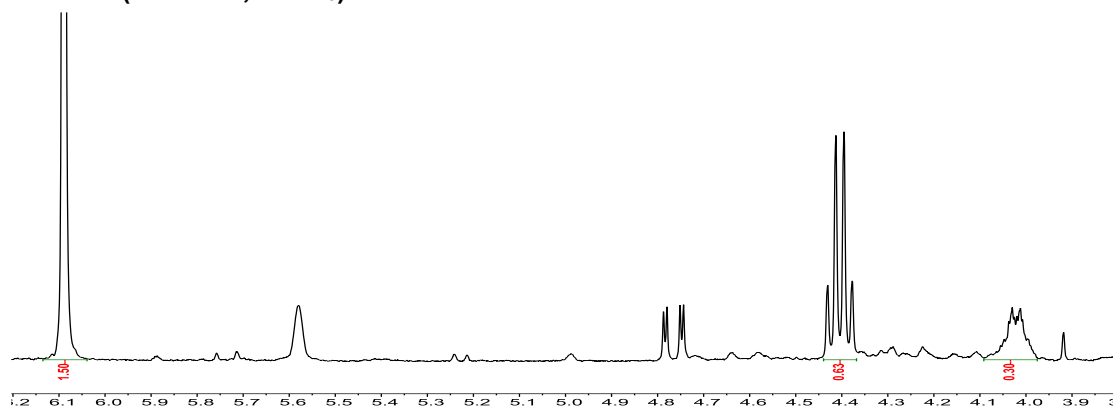

**Reaction 2 (40 min)**  
**<sup>1</sup>H MNR (400 MHz, CDCl<sub>3</sub>)**

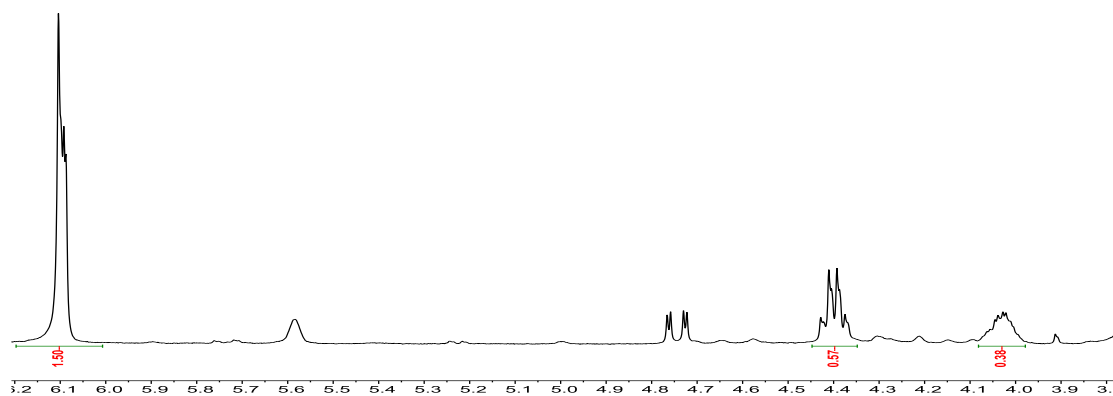

**Reaction 2 (50 min)**  
 **$^1\text{H}$  MNR (400 MHz,  $\text{CDCl}_3$ )**

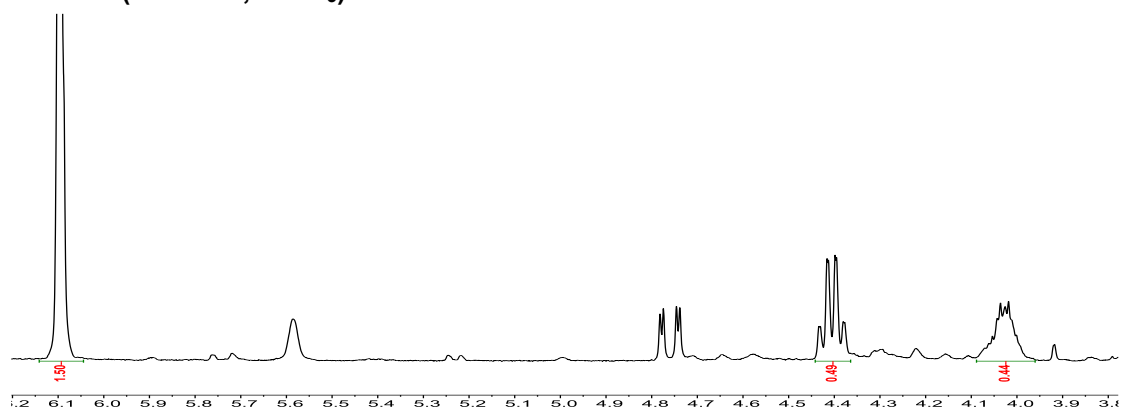

**Reaction 2 (60 min)**  
 **$^1\text{H}$  MNR (400 MHz,  $\text{CDCl}_3$ )**

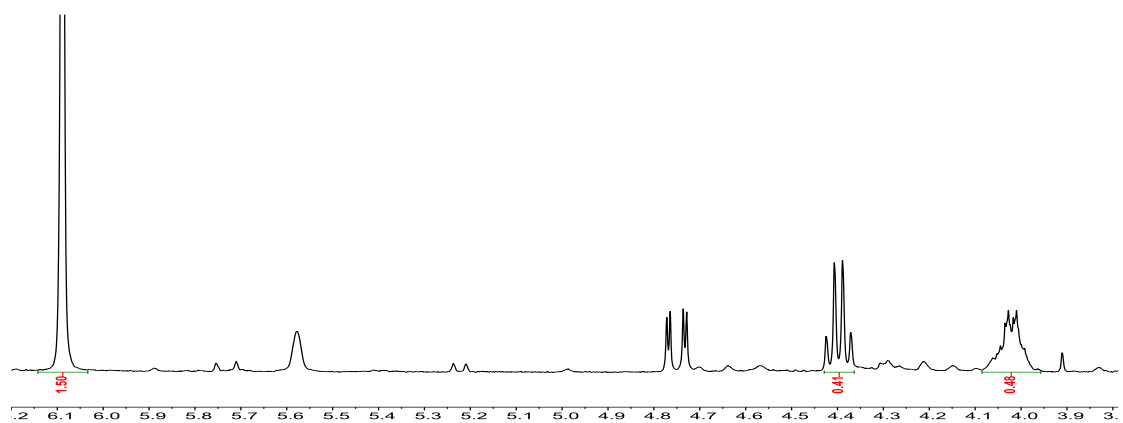

Supplement: d1ob00116g1.pdf [file d1ob00116g1.pdf]
